# Supplementary material for: Mean-Centering Does Not Alleviate Collinearity Problems in Moderated Multiple Regression Models
Source: Atypon-hosted journal article supplement (doi:10.1287/mksc.1060.0263), 2007-05-01
Supplement: mksc.1060.0263-sm-technical-appendix.pdf [file mksc.1060.0263-sm-technical-appendix.pdf]

brand extension data

| SNO | QUALITY | COMPLEM | SUBSTITU | TRANSFER | DIFFICUL | qualextn | qualsubs |    |
|-----|---------|---------|----------|----------|----------|----------|----------|----|
| 923 | 4       | 7       | 7        | 7        | 7        | 6        | 3.5      | 28 |
| 923 | 1       | 7       | 7        | 1        | 1        | 5        | 1        | 1  |
| 923 | 5       | 7       | 7        | 5        | 1        | 1        | 3.5      | 25 |
| 923 | 1       | 7       | 7        | 1        | 5        | 5        | 3        | 1  |
| 923 | 1       | 7       | 7        | 1        | 7        | 5        | 1        | 1  |
| 923 | 1       | 7       | 7        | 6        | 7        | 1        | 1        | 6  |
| 923 | 4       | 7       | 7        | 7        | 1        | 7        | 1        | 28 |
| 923 | 1       | 7       | 7        | 1        | 1        | 2        | 3        | 1  |
| 923 | 5       | 3       | 3        | 3        | 7        | 2        | 5.5      | 15 |
| 923 | 1       | 7       | 7        | 1        | 5        | 5        | 1        | 1  |
| 923 | 1       | 1       | 1        | 1        | 3        | 5        | 1        | 1  |
| 923 | 1       | 7       | 7        | 1        | 1        | 7        | 1        | 1  |
| 923 | 4       | 7       | 7        | 1        | 1        | 1        | 1        | 4  |
| 923 | 1       | 7       | 7        | 1        | 3        | 3        | 5        | 1  |
| 923 | 5       | 7       | 7        | 7        | 7        | 2        | 5        | 35 |
| 923 | 1       | 1       | 1        | 1        | 5        | 5        | 1        | 1  |
| 923 | 1       | 7       | 7        | 1        | 6        | 5        | 2.5      | 1  |
| 923 | 1       | 1       | 1        | 1        | 1        | 5        | 1        | 1  |
| 923 | 1       | 7       | 7        | 1        | 1        | 5        | 5        | 1  |
| 923 | 1       | 1       | 1        | 1        | 1        | 3        | 5        | 1  |
| 924 | 4       | 7       | 7        | 7        | 7        | 6        | 5.5      | 28 |
| 924 | 6       | 7       | 7        | 1        | 5        | 7        | 3        | 6  |
| 924 | 6       | 1       | 4        | 4        | 1        | 2        | 1        | 24 |
| 924 | 5       | 6       | 1        | 1        | 4        | 5        | 3.5      | 5  |
| 924 | 6       | 7       | 2        | 2        | 7        | 4        | 4        | 12 |
| 924 | 3       | 7       | 2        | 2        | 6        | 4        | 5.5      | 6  |
| 924 | 4       | 7       | 1        | 3        | 3        | 5        | 2.5      | 4  |
| 924 | 6       | 2       | 1        | 1        | 1        | 3        | 3        | 6  |
| 924 | 6       | 1       | 7        | 7        | 1        | 1        | 1.5      | 42 |
| 924 | 5       | 6       | 1        | 4        | 4        | 6        | 2        | 5  |
| 924 | 6       | 3       | 1        | 1        | 4        | 3        | 4        | 6  |
| 924 | 3       | 4       | 1        | 5        | 7        | 7        | 5.5      | 3  |
| 924 | 4       | 4       | 1        | 1        | 1        | 2        | 1.5      | 4  |
| 924 | 6       | 7       | 1        | 5        | 6        | 6        | 6        | 6  |
| 924 | 6       | 5       | 7        | 6        | 6        | 4        | 3        | 42 |
| 924 | 5       | 3       | 1        | 2        | 2        | 3        | 1.5      | 5  |
| 924 | 6       | 1       | 1        | 2        | 3        | 3        | 2.5      | 6  |
| 924 | 3       | 1       | 1        | 1        | 7        | 7        | 1        | 3  |
| 924 | 6       | 4       | 1        | 4        | 6        | 6        | 4.5      | 6  |
| 924 | 5       | 2       | 1        | 1        | 6        | 6        | 3.5      | 5  |
| 925 | 6       | 7       | 7        | 7        | 7        | 5        | 3        | 42 |
| 925 | 7       | 7       | 1        | 2        | 7        | 7        | 2.5      | 7  |
| 925 | 7       | 4       | 7        | 6        | 1        | 5.5      | 49       |    |
| 925 | 5       | 6       | 2        | 6        | 1        | 4        | 10       |    |
| 925 | 4       | 6       | 5        | 6        | 2        | 3        | 20       |    |
| 925 | 3       | 4       | 7        | 6        | 1        | 4.5      | 21       |    |
| 925 | 6       | 7       | 5        | 5        | 5        | 5.5      | 30       |    |
| 925 | 7       | 5       | 2        | 2        | 3        | 2.5      | 14       |    |
| 925 | 7       | 3       | 5        | 5        | 1        | 4.5      | 35       |    |
| 925 | 5       | 5       | 2        | 6        | 1        | 5.5      | 10       |    |

brand extension data

|     |   |   |   |   |   |     |    |
|-----|---|---|---|---|---|-----|----|
| 925 | 4 | 4 | 4 | 3 | 2 | 5   | 16 |
| 925 | 3 | 2 | 2 | 3 | 4 | 2.5 | 6  |
| 925 | 6 | 6 | 3 | 1 | 1 | 4.5 | 18 |
| 925 | 7 | 5 | 3 | 2 | 2 | 4.5 | 21 |
| 925 | 7 | 6 | 7 | 5 | 2 | 6   | 49 |
| 925 | 5 | 4 | 2 | 2 | 6 | 4   | 10 |
| 925 | 4 | 5 | 5 | 3 | 2 | 2.5 | 20 |
| 925 | 3 | 2 | 1 | 2 | 6 | 2.5 | 3  |
| 925 | 7 | 4 | 2 | 2 | 5 | 4   | 14 |
| 925 | 5 | 3 | 2 | 2 | 2 | 4.5 | 10 |
| 926 | 3 | 7 | 7 | 7 | 5 | 2   | 21 |
| 926 | 5 | 7 | 7 | 3 | 7 | 1   | 35 |
| 926 | 3 | 6 | 4 | 1 | 1 | 1.5 | 12 |
| 926 | 4 | 2 | 1 | 4 | 4 | 1.5 | 4  |
| 926 | 4 | 2 | 1 | 2 | 3 | 2   | 4  |
| 926 | 2 | 3 | 3 | 6 | 1 | 1.5 | 6  |
| 926 | 3 | 3 | 1 | 2 | 5 | 1.5 | 3  |
| 926 | 5 | 2 | 1 | 3 | 4 | 4   | 5  |
| 926 | 3 | 2 | 1 | 1 | 2 | 1.5 | 3  |
| 926 | 4 | 2 | 1 | 5 | 4 | 2   | 4  |
| 926 | 4 | 5 | 5 | 6 | 3 | 5   | 20 |
| 926 | 2 | 2 | 2 | 3 | 2 | 2   | 4  |
| 926 | 3 | 2 | 4 | 1 | 1 | 1.5 | 12 |
| 926 | 5 | 2 | 1 | 3 | 3 | 4   | 5  |
| 926 | 3 | 2 | 1 | 1 | 2 | 2   | 3  |
| 926 | 4 | 2 | 1 | 3 | 5 | 1   | 4  |
| 926 | 4 | 2 | 1 | 3 | 4 | 3.5 | 4  |
| 926 | 2 | 1 | 1 | 1 | 6 | 1.5 | 2  |
| 926 | 5 | 2 | 1 | 3 | 4 | 5.5 | 5  |
| 926 | 4 | 2 | 1 | 1 | 3 | 2.5 | 4  |
| 927 | 5 | 2 | 1 | 6 | 1 | 2   | 5  |
| 927 | 7 | 6 | 1 | 5 | 7 | 3.5 | 7  |
| 927 | 7 | 5 | 6 | 2 | 1 | 2.5 | 42 |
| 927 | 4 | 6 | 1 | 6 | 3 | 2.5 | 4  |
| 927 | 7 | 1 | 1 | 5 | 2 | 3   | 7  |
| 927 | 1 | 1 | 4 | 6 | 1 | 1.5 | 4  |
| 927 | 5 | 2 | 7 | 3 | 6 | 1.5 | 35 |
| 927 | 7 | 6 | 1 | 2 | 3 | 5   | 7  |
| 927 | 7 | 1 | 1 | 1 | 1 | 1.5 | 7  |
| 927 | 4 | 1 | 1 | 5 | 2 | 3.5 | 4  |
| 927 | 7 | 4 | 4 | 6 | 5 | 4.5 | 28 |
| 927 | 1 | 1 | 1 | 1 | 5 | 3.5 | 1  |
| 927 | 5 | 7 | 1 | 1 | 1 | 1.5 | 5  |
| 927 | 7 | 6 | 1 | 5 | 7 | 5.5 | 7  |
| 927 | 7 | 3 | 7 | 6 | 1 | 3   | 49 |
| 927 | 4 | 5 | 1 | 2 | 6 | 1.5 | 4  |
| 927 | 7 | 1 | 1 | 1 | 1 | 1.5 | 7  |
| 927 | 1 | 5 | 1 | 1 | 6 | 2   | 1  |
| 927 | 7 | 6 | 1 | 2 | 5 | 5   | 7  |
| 927 | 4 | 5 | 1 | 1 | 7 | 2.5 | 4  |
| 928 | 6 | 7 | 7 | 7 | 5 | 5   | 42 |

brand extension data

|     |   |   |   |   |   |     |    |
|-----|---|---|---|---|---|-----|----|
| 928 | 6 | 4 | 4 | 1 | 6 | 4   | 24 |
| 928 | 6 | 2 | 2 | 1 | 2 | 3.5 | 12 |
| 928 | 6 | 6 | 6 | 3 | 5 | 4   | 36 |
| 928 | 6 | 4 | 6 | 4 | 5 | 5.5 | 36 |
| 928 | 5 | 4 | 3 | 6 | 3 | 3.5 | 15 |
| 928 | 6 | 5 | 4 | 4 | 7 | 4   | 24 |
| 928 | 6 | 3 | 3 | 1 | 4 | 4   | 18 |
| 928 | 6 | 1 | 1 | 1 | 3 | 2.5 | 6  |
| 928 | 6 | 6 | 6 | 3 | 5 | 6   | 36 |
| 928 | 6 | 3 | 5 | 4 | 5 | 5   | 30 |
| 928 | 5 | 5 | 5 | 1 | 7 | 5   | 25 |
| 928 | 6 | 4 | 2 | 2 | 2 | 3   | 12 |
| 928 | 6 | 5 | 6 | 1 | 4 | 5.5 | 36 |
| 928 | 6 | 4 | 4 | 2 | 4 | 5   | 24 |
| 928 | 6 | 6 | 6 | 2 | 6 | 5   | 36 |
| 928 | 6 | 5 | 4 | 4 | 5 | 3.5 | 24 |
| 928 | 5 | 1 | 1 | 1 | 6 | 1   | 5  |
| 928 | 6 | 4 | 4 | 1 | 5 | 2.5 | 24 |
| 928 | 6 | 6 | 5 | 1 | 4 | 5.5 | 30 |
| 929 | 5 | 7 | 7 | 7 | 6 | 6   | 35 |
| 929 | 6 | 7 | 1 | 1 | 7 | 3   | 6  |
| 929 | 6 | 5 | 5 | 2 | 1 | 5   | 30 |
| 929 | 2 | 6 | 1 | 2 | 6 | 1   | 2  |
| 929 | 2 | 5 | 6 | 7 | 2 | 1   | 12 |
| 929 | 3 | 1 | 5 | 2 | 4 | 4.5 | 15 |
| 929 | 5 | 7 | 7 | 3 | 7 | 1   | 35 |
| 929 | 6 | 5 | 1 | 6 | 2 | 2.5 | 6  |
| 929 | 6 | 2 | 5 | 4 | 2 | 3   | 30 |
| 929 | 2 | 2 | 1 | 6 | 4 | 2   | 2  |
| 929 | 2 | 2 | 5 | 3 | 5 | 1   | 10 |
| 929 | 3 | 5 | 1 | 5 | 6 | 6   | 3  |
| 929 | 5 | 4 | 2 | 2 | 1 | 3.5 | 10 |
| 929 | 6 | 7 | 1 | 2 | 6 | 6   | 6  |
| 929 | 6 | 2 | 6 | 7 | 3 | 7   | 36 |
| 929 | 2 | 6 | 1 | 1 | 7 | 1   | 2  |
| 929 | 2 | 7 | 1 | 5 | 1 | 6   | 2  |
| 929 | 3 | 2 | 1 | 5 | 3 | 4.5 | 3  |
| 929 | 6 | 4 | 1 | 6 | 5 | 3   | 6  |
| 929 | 2 | 2 | 1 | 1 | 6 | 2   | 2  |
| 930 | 6 | 4 | 7 | 7 | 4 | 6   | 42 |
| 930 | 6 | 7 | 4 | 6 | 6 | 5   | 24 |
| 930 | 7 | 7 | 7 | 4 | 2 | 2.5 | 49 |
| 930 | 5 | 5 | 4 | 5 | 4 | 2.5 | 20 |
| 930 | 6 | 7 | 7 | 7 | 4 | 5.5 | 42 |
| 930 | 4 | 7 | 6 | 7 | 2 | 3.5 | 24 |
| 930 | 6 | 4 | 6 | 6 | 5 | 1.5 | 36 |
| 930 | 6 | 5 | 4 | 4 | 5 | 3   | 24 |
| 930 | 7 | 2 | 4 | 5 | 3 | 1   | 28 |
| 930 | 5 | 5 | 5 | 5 | 4 | 3.5 | 25 |
| 930 | 6 | 6 | 5 | 6 | 4 | 3   | 30 |
| 930 | 4 | 4 | 2 | 2 | 7 | 4.5 | 8  |

brand extension data

|     |   |   |   |   |   |     |    |
|-----|---|---|---|---|---|-----|----|
| 930 | 6 | 4 | 2 | 5 | 2 | 1   | 12 |
| 930 | 6 | 7 | 4 | 4 | 6 | 5   | 24 |
| 930 | 7 | 7 | 7 | 6 | 4 | 3.5 | 49 |
| 930 | 5 | 4 | 3 | 4 | 6 | 1   | 15 |
| 930 | 6 | 5 | 3 | 5 | 4 | 3   | 18 |
| 930 | 4 | 1 | 1 | 1 | 7 | 1   | 4  |
| 930 | 6 | 6 | 3 | 4 | 6 | 4   | 18 |
| 930 | 5 | 2 | 2 | 3 | 6 | 2.5 | 10 |
| 931 | 4 | 7 | 3 | 7 | 4 | 2.5 | 12 |
| 931 | 7 | 7 | 1 | 2 | 6 | 4.5 | 7  |
| 931 | 6 | 5 | 1 | 1 | 1 | 2   | 6  |
| 931 | 5 | 6 | 1 | 3 | 5 | 6   | 5  |
| 931 | 7 | 7 | 5 | 7 | 5 | 7   | 35 |
| 931 | 2 | 2 | 6 | 7 | 4 | 6   | 12 |
| 931 | 4 | 7 | 1 | 4 | 5 | 2   | 4  |
| 931 | 7 | 6 | 1 | 2 | 4 | 6   | 7  |
| 931 | 6 | 1 | 1 | 1 | 2 | 1   | 6  |
| 931 | 5 | 3 | 1 | 2 | 5 | 2.5 | 5  |
| 931 | 7 | 2 | 1 | 2 | 5 | 2   | 7  |
| 931 | 2 | 1 | 1 | 1 | 7 | 4.5 | 2  |
| 931 | 4 | 5 | 1 | 1 | 1 | 1.5 | 4  |
| 931 | 7 | 6 | 1 | 2 | 6 | 6   | 7  |
| 931 | 6 | 6 | 6 | 5 | 4 | 5   | 36 |
| 931 | 5 | 7 | 1 | 1 | 6 | 3   | 5  |
| 931 | 7 | 1 | 1 | 1 | 3 | 1.5 | 7  |
| 931 | 2 | 1 | 1 | 1 | 1 | 1   | 2  |
| 931 | 7 | 6 | 1 | 2 | 7 | 5.5 | 7  |
| 931 | 5 | 3 | 1 | 1 | 6 | 4.5 | 5  |
| 932 | 5 | 7 | 7 | 6 | 2 | 6   | 35 |
| 932 | 7 | 7 | 7 | 6 | 6 | 5.5 | 49 |
| 932 | 7 | 1 | 1 | 1 | 1 | 1.5 | 7  |
| 932 | 5 | 1 | 6 | 5 | 7 | 1.5 | 30 |
| 932 | 5 | 7 | 7 | 6 | 6 | 5.5 | 35 |
| 932 | 5 | 7 | 6 | 6 | 1 | 6   | 30 |
| 932 | 5 | 6 | 6 | 6 | 2 | 1.5 | 30 |
| 932 | 7 | 1 | 2 | 2 | 2 | 1.5 | 14 |
| 932 | 7 | 1 | 1 | 1 | 1 | 1.5 | 7  |
| 932 | 5 | 1 | 2 | 5 | 6 | 1.5 | 10 |
| 932 | 5 | 2 | 1 | 5 | 2 | 3.5 | 5  |
| 932 | 5 | 1 | 1 | 6 | 7 | 4   | 5  |
| 932 | 5 | 1 | 1 | 2 | 1 | 1   | 5  |
| 932 | 7 | 7 | 7 | 5 | 2 | 6   | 49 |
| 932 | 7 | 1 | 6 | 1 | 1 | 3.5 | 42 |
| 932 | 5 | 6 | 6 | 5 | 6 | 3.5 | 30 |
| 932 | 5 | 1 | 1 | 1 | 2 | 1   | 5  |
| 932 | 5 | 1 | 1 | 2 | 6 | 1   | 5  |
| 932 | 7 | 7 | 6 | 5 | 6 | 6.5 | 42 |
| 932 | 5 | 1 | 6 | 5 | 2 | 4   | 30 |
| 933 | 5 | 6 | 6 | 6 | 4 | 4.5 | 30 |
| 933 | 6 | 4 | 2 | 2 | 6 | 2   | 12 |
| 933 | 6 | 1 | 1 | 2 | 1 | 3.5 | 6  |

brand extension data

|     |   |   |   |   |   |     |    |
|-----|---|---|---|---|---|-----|----|
| 933 | 5 | 5 | 5 | 5 | 3 | 4   | 25 |
| 933 | 6 | 2 | 2 | 4 | 3 | 5   | 12 |
| 933 | 3 | 5 | 4 | 5 | 2 | 4   | 12 |
| 933 | 5 | 3 | 1 | 5 | 5 | 2.5 | 5  |
| 933 | 6 | 3 | 3 | 3 | 3 | 5   | 18 |
| 933 | 6 | 3 | 6 | 6 | 3 | 5.5 | 36 |
| 933 | 5 | 4 | 5 | 5 | 3 | 5   | 25 |
| 933 | 6 | 4 | 2 | 4 | 3 | 3.5 | 12 |
| 933 | 3 | 1 | 3 | 1 | 7 | 3   | 9  |
| 933 | 5 | 5 | 6 | 2 | 1 | 3.5 | 30 |
| 933 | 6 | 5 | 3 | 3 | 5 | 5.5 | 18 |
| 933 | 6 | 5 | 6 | 4 | 4 | 5   | 36 |
| 933 | 5 | 4 | 5 | 5 | 3 | 4   | 25 |
| 933 | 6 | 3 | 2 | 4 | 3 | 4   | 12 |
| 933 | 3 | 1 | 3 | 1 | 6 | 3   | 9  |
| 933 | 6 | 3 | 4 | 2 | 6 | 3.5 | 24 |
| 933 | 5 | 3 | 4 | 2 | 5 | 3.5 | 20 |
| 934 | 4 | 6 | 6 | 5 | 6 | 6   | 24 |
| 934 | 7 | 5 | 3 | 6 | 6 | 6   | 21 |
| 934 | 7 | 6 | 6 | 7 | 1 | 4.5 | 42 |
| 934 | 7 | 6 | 6 | 6 | 4 | 3.5 | 42 |
| 934 | 7 | 6 | 6 | 5 | 1 | 6   | 42 |
| 934 | 2 | 3 | 6 | 6 | 1 | 3   | 12 |
| 934 | 4 | 6 | 3 | 6 | 6 | 4   | 12 |
| 934 | 7 | 6 | 5 | 5 | 7 | 6   | 35 |
| 934 | 7 | 4 | 4 | 5 | 1 | 6   | 28 |
| 934 | 7 | 4 | 6 | 3 | 5 | 5   | 42 |
| 934 | 7 | 4 | 6 | 6 | 1 | 5.5 | 42 |
| 934 | 2 | 5 | 3 | 4 | 1 | 1.5 | 6  |
| 934 | 4 | 5 | 5 | 6 | 1 | 2   | 20 |
| 934 | 7 | 6 | 4 | 7 | 7 | 6.5 | 28 |
| 934 | 7 | 6 | 6 | 7 | 1 | 6   | 42 |
| 934 | 7 | 6 | 4 | 1 | 7 | 5   | 28 |
| 934 | 7 | 5 | 5 | 6 | 1 | 5   | 35 |
| 934 | 2 | 4 | 3 | 2 | 2 | 2.5 | 6  |
| 934 | 7 | 5 | 4 | 4 | 7 | 3.5 | 28 |
| 934 | 7 | 6 | 3 | 2 | 7 | 5.5 | 21 |
| 935 | 6 | 7 | 5 | 7 | 6 | 4   | 30 |
| 935 | 3 | 4 | 4 | 1 | 5 | 2.5 | 12 |
| 935 | 5 | 6 | 5 | 2 | 2 | 2.5 | 25 |
| 935 | 4 | 6 | 5 | 5 | 3 | 3   | 20 |
| 935 | 7 | 7 | 7 | 7 | 2 | 5.5 | 49 |
| 935 | 6 | 5 | 5 | 5 | 4 | 4.5 | 30 |
| 935 | 6 | 6 | 5 | 6 | 6 | 3.5 | 30 |
| 935 | 3 | 3 | 4 | 1 | 2 | 2.5 | 12 |
| 935 | 5 | 3 | 4 | 2 | 3 | 1.5 | 20 |
| 935 | 4 | 6 | 7 | 6 | 3 | 5.5 | 28 |
| 935 | 7 | 2 | 3 | 1 | 1 | 3   | 21 |
| 935 | 6 | 4 | 3 | 5 | 7 | 4.5 | 18 |
| 935 | 6 | 4 | 4 | 2 | 2 | 5   | 24 |
| 935 | 3 | 4 | 4 | 1 | 4 | 5   | 12 |

brand extension data

|     |   |   |   |   |   |     |    |
|-----|---|---|---|---|---|-----|----|
| 935 | 5 | 7 | 6 | 6 | 4 | 5   | 30 |
| 935 | 4 | 5 | 5 | 3 | 2 | 5   | 20 |
| 935 | 7 | 3 | 4 | 4 | 2 | 3   | 28 |
| 935 | 6 | 1 | 1 | 1 | 5 | 2   | 6  |
| 935 | 3 | 3 | 3 | 1 | 5 | 1.5 | 9  |
| 935 | 4 | 2 | 1 | 1 | 4 | 3.5 | 4  |
| 936 | 6 | 1 | 6 | 6 | 6 | 5   | 36 |
| 936 | 7 | 7 | 1 | 3 | 6 | 5   | 7  |
| 936 | 6 | 1 | 5 | 1 | 5 | 4   | 30 |
| 936 | 5 | 6 | 3 | 6 | 5 | 3   | 15 |
| 936 | 5 | 6 | 1 | 6 | 5 | 2.5 | 5  |
| 936 | 3 | 4 | 5 | 6 | 3 | 3.5 | 15 |
| 936 | 6 | 3 | 6 | 4 | 5 | 3.5 | 36 |
| 936 | 7 | 7 | 1 | 3 | 5 | 6   | 7  |
| 936 | 6 | 3 | 4 | 6 | 2 | 3   | 24 |
| 936 | 5 | 5 | 5 | 6 | 5 | 4.5 | 25 |
| 936 | 5 | 3 | 7 | 2 | 3 | 2   | 35 |
| 936 | 3 | 3 | 4 | 3 | 6 | 3   | 12 |
| 936 | 6 | 7 | 1 | 1 | 5 | 2   | 6  |
| 936 | 7 | 6 | 1 | 3 | 6 | 4.5 | 7  |
| 936 | 6 | 2 | 5 | 4 | 3 | 3.5 | 30 |
| 936 | 5 | 5 | 4 | 4 | 5 | 3.5 | 20 |
| 936 | 5 | 5 | 3 | 4 | 5 | 2.5 | 15 |
| 936 | 3 | 1 | 3 | 3 | 7 | 2   | 9  |
| 936 | 7 | 5 | 3 | 2 | 7 | 6   | 21 |
| 936 | 5 | 5 | 5 | 2 | 6 | 3.5 | 25 |
| 937 | 7 | 1 | 1 | 7 | 5 | 7   | 7  |
| 937 | 5 | 1 | 1 | 3 | 3 | 1   | 5  |
| 937 | 7 | 7 | 4 | 3 | 1 | 1   | 28 |
| 937 | 3 | 1 | 1 | 3 | 6 | 3   | 3  |
| 937 | 6 | 7 | 1 | 7 | 6 | 6   | 6  |
| 937 | 4 | 6 | 1 | 4 | 1 | 3.5 | 4  |
| 937 | 7 | 7 | 4 | 3 | 5 | 7   | 28 |
| 937 | 5 | 1 | 1 | 3 | 3 | 1   | 5  |
| 937 | 7 | 1 | 1 | 6 | 1 | 1   | 7  |
| 937 | 3 | 1 | 1 | 3 | 6 | 3   | 3  |
| 937 | 6 | 7 | 6 | 7 | 4 | 1   | 36 |
| 937 | 4 | 1 | 1 | 1 | 4 | 1   | 4  |
| 937 | 7 | 7 | 7 | 3 | 1 | 1   | 49 |
| 937 | 5 | 1 | 1 | 3 | 3 | 6   | 5  |
| 937 | 7 | 7 | 7 | 7 | 1 | 6   | 49 |
| 937 | 3 | 1 | 1 | 3 | 6 | 1   | 3  |
| 937 | 6 | 1 | 1 | 1 | 6 | 1   | 6  |
| 937 | 4 | 1 | 1 | 1 | 4 | 1   | 4  |
| 937 | 5 | 1 | 1 | 3 | 5 | 6   | 5  |
| 937 | 3 | 1 | 1 | 3 | 3 | 3.5 | 3  |
| 938 | 6 | 5 | 7 | 7 | 6 | 6   | 42 |
| 938 | 6 | 7 | 1 | 3 | 5 | 5   | 6  |
| 938 | 6 | 5 | 5 | 3 | 3 | 4   | 30 |
| 938 | 4 | 5 | 3 | 4 | 4 | 3.5 | 12 |
| 938 | 5 | 7 | 4 | 7 | 5 | 5.5 | 20 |

brand extension data

|     |   |   |   |   |   |     |    |
|-----|---|---|---|---|---|-----|----|
| 938 | 4 | 2 | 4 | 5 | 4 | 3   | 16 |
| 938 | 6 | 6 | 5 | 6 | 6 | 3   | 30 |
| 938 | 6 | 6 | 2 | 3 | 3 | 3   | 12 |
| 938 | 6 | 2 | 3 | 1 | 3 | 2   | 18 |
| 938 | 4 | 5 | 2 | 4 | 4 | 5   | 8  |
| 938 | 5 | 4 | 4 | 6 | 4 | 5.5 | 20 |
| 938 | 4 | 4 | 2 | 1 | 7 | 2.5 | 8  |
| 938 | 6 | 7 | 1 | 2 | 3 | 2   | 6  |
| 938 | 6 | 6 | 2 | 3 | 4 | 5   | 12 |
| 938 | 6 | 4 | 6 | 4 | 4 | 5   | 36 |
| 938 | 4 | 5 | 2 | 3 | 7 | 2   | 8  |
| 938 | 5 | 4 | 2 | 4 | 3 | 2.5 | 10 |
| 938 | 4 | 1 | 1 | 1 | 5 | 2.5 | 4  |
| 938 | 6 | 6 | 4 | 2 | 4 | 4   | 24 |
| 938 | 4 | 1 | 2 | 1 | 4 | 3.5 | 8  |
| 939 | 5 | 2 | 4 | 7 | 3 | 7   | 20 |
| 939 | 5 | 7 | 1 | 2 | 6 | 6.5 | 5  |
| 939 | 6 | 4 | 3 | 1 | 1 | 3   | 18 |
| 939 | 2 | 7 | 1 | 5 | 2 | 2.5 | 2  |
| 939 | 6 | 2 | 2 | 6 | 2 | 6   | 12 |
| 939 | 3 | 6 | 6 | 6 | 1 | 6   | 18 |
| 939 | 5 | 7 | 7 | 2 | 5 | 2.5 | 35 |
| 939 | 5 | 7 | 1 | 1 | 6 | 4.5 | 5  |
| 939 | 6 | 1 | 1 | 1 | 1 | 3   | 6  |
| 939 | 6 | 1 | 6 | 4 | 3 | 5.5 | 36 |
| 939 | 3 | 7 | 5 | 2 | 4 | 5.5 | 15 |
| 939 | 5 | 7 | 1 | 1 | 1 | 2.5 | 5  |
| 939 | 5 | 7 | 5 | 2 | 6 | 6   | 25 |
| 939 | 6 | 3 | 7 | 5 | 3 | 5.5 | 42 |
| 939 | 2 | 6 | 1 | 5 | 5 | 2.5 | 2  |
| 939 | 6 | 6 | 1 | 2 | 2 | 2.5 | 6  |
| 939 | 3 | 1 | 1 | 1 | 5 | 5.5 | 3  |
| 939 | 5 | 7 | 3 | 2 | 6 | 6   | 15 |
| 939 | 2 | 2 | 1 | 1 | 6 | 4.5 | 2  |
| 940 | 7 | 7 | 7 | 7 | 5 | 7   | 49 |
| 940 | 7 | 7 | 1 | 4 | 7 | 4.5 | 7  |
| 940 | 7 | 1 | 1 | 1 | 2 | 1.5 | 7  |
| 940 | 4 | 6 | 1 | 4 | 2 | 2   | 4  |
| 940 | 6 | 7 | 4 | 6 | 4 | 6   | 24 |
| 940 | 4 | 7 | 7 | 7 | 3 | 3.5 | 28 |
| 940 | 7 | 7 | 4 | 5 | 5 | 1   | 28 |
| 940 | 7 | 4 | 1 | 1 | 3 | 2   | 7  |
| 940 | 7 | 1 | 4 | 1 | 2 | 1   | 28 |
| 940 | 4 | 2 | 1 | 4 | 3 | 3   | 4  |
| 940 | 6 | 3 | 4 | 6 | 4 | 4   | 24 |
| 940 | 4 | 4 | 4 | 4 | 5 | 2   | 16 |
| 940 | 7 | 7 | 1 | 1 | 2 | 1   | 7  |
| 940 | 7 | 7 | 1 | 1 | 4 | 5.5 | 7  |
| 940 | 7 | 4 | 7 | 4 | 2 | 2.5 | 49 |
| 940 | 4 | 2 | 1 | 4 | 6 | 1.5 | 4  |
| 940 | 6 | 7 | 1 | 2 | 2 | 1.5 | 6  |

brand extension data

|     |   |   |   |   |   |     |    |
|-----|---|---|---|---|---|-----|----|
| 940 | 4 | 1 | 1 | 1 | 3 | 1   | 4  |
| 940 | 7 | 4 | 1 | 2 | 4 | 2.5 | 7  |
| 940 | 4 | 1 | 1 | 2 | 4 | 1   | 4  |
| 941 | 7 | 7 | 7 | 7 | 6 | 6   | 49 |
| 941 | 7 | 7 | 1 | 2 | 6 | 6.5 | 7  |
| 941 | 3 | 5 | 6 | 2 | 2 | 5   | 18 |
| 941 | 2 | 5 | 1 | 3 | 7 | 2   | 2  |
| 941 | 7 | 7 | 3 | 7 | 5 | 7   | 21 |
| 941 | 3 | 3 | 4 | 7 | 2 | 6.5 | 12 |
| 941 | 7 | 7 | 5 | 3 | 7 | 5   | 35 |
| 941 | 7 | 7 | 1 | 1 | 4 | 6   | 7  |
| 941 | 3 | 4 | 1 | 1 | 3 | 3   | 3  |
| 941 | 2 | 5 | 1 | 3 | 7 | 3   | 2  |
| 941 | 7 | 7 | 1 | 5 | 6 | 4   | 7  |
| 941 | 3 | 6 | 1 | 4 | 7 | 5.5 | 3  |
| 941 | 7 | 7 | 1 | 1 | 2 | 6   | 7  |
| 941 | 7 | 7 | 1 | 2 | 4 | 6   | 7  |
| 941 | 3 | 5 | 3 | 1 | 6 | 5   | 9  |
| 941 | 2 | 5 | 1 | 2 | 7 | 2   | 2  |
| 941 | 7 | 7 | 1 | 3 | 7 | 5.5 | 7  |
| 941 | 3 | 6 | 1 | 1 | 5 | 5   | 3  |
| 941 | 7 | 7 | 1 | 1 | 7 | 5.5 | 7  |
| 941 | 2 | 5 | 1 | 1 | 4 | 3   | 2  |
| 942 | 5 | 7 | 7 | 7 | 6 | 3.5 | 35 |
| 942 | 7 | 7 | 1 | 1 | 7 | 6   | 7  |
| 942 | 7 | 2 | 1 | 1 | 1 | 3.5 | 7  |
| 942 | 7 | 6 | 4 | 6 | 4 | 3.5 | 28 |
| 942 | 7 | 6 | 3 | 7 | 5 | 5   | 21 |
| 942 | 4 | 1 | 5 | 7 | 5 | 2   | 20 |
| 942 | 5 | 7 | 3 | 5 | 4 | 3.5 | 15 |
| 942 | 7 | 2 | 3 | 1 | 3 | 4   | 21 |
| 942 | 7 | 2 | 2 | 1 | 3 | 3.5 | 14 |
| 942 | 7 | 6 | 4 | 6 | 3 | 3.5 | 28 |
| 942 | 7 | 7 | 5 | 3 | 5 | 4.5 | 35 |
| 942 | 4 | 6 | 4 | 1 | 6 | 3.5 | 16 |
| 942 | 5 | 7 | 1 | 1 | 1 | 3.5 | 5  |
| 942 | 7 | 5 | 3 | 1 | 5 | 4.5 | 21 |
| 942 | 7 | 2 | 3 | 1 | 3 | 4.5 | 21 |
| 942 | 7 | 6 | 6 | 5 | 5 | 3.5 | 42 |
| 942 | 7 | 6 | 3 | 4 | 3 | 3   | 21 |
| 942 | 4 | 2 | 4 | 1 | 4 | 2.5 | 16 |
| 942 | 7 | 5 | 2 | 1 | 5 | 3.5 | 14 |
| 942 | 7 | 5 | 3 | 1 | 5 | 4.5 | 21 |
| 943 | 6 | 7 | 2 | 7 | 7 | 3.5 | 12 |
| 943 | 6 | 7 | 1 | 3 | 7 | 3   | 6  |
| 943 | 6 | 3 | 3 | 4 | 6 | 4.5 | 18 |
| 943 | 5 | 6 | 1 | 6 | 5 | 3   | 5  |
| 943 | 6 | 2 | 5 | 7 | 5 | 5   | 30 |
| 943 | 5 | 6 | 4 | 6 | 5 | 7   | 20 |
| 943 | 6 | 6 | 1 | 6 | 7 | 3   | 6  |
| 943 | 6 | 6 | 1 | 5 | 4 | 2.5 | 6  |

brand extension data

|     |   |   |   |   |   |     |    |
|-----|---|---|---|---|---|-----|----|
| 943 | 6 | 2 | 1 | 6 | 5 | 3   | 6  |
| 943 | 5 | 3 | 1 | 6 | 5 | 3   | 5  |
| 943 | 6 | 3 | 2 | 5 | 5 | 3.5 | 12 |
| 943 | 5 | 6 | 1 | 1 | 7 | 2   | 5  |
| 943 | 6 | 7 | 1 | 4 | 6 | 1   | 6  |
| 943 | 6 | 7 | 5 | 5 | 5 | 4   | 30 |
| 943 | 6 | 5 | 1 | 6 | 5 | 2.5 | 6  |
| 943 | 5 | 4 | 1 | 6 | 6 | 2.5 | 5  |
| 943 | 6 | 6 | 1 | 7 | 5 | 4.5 | 6  |
| 943 | 5 | 1 | 1 | 1 | 4 | 1   | 5  |
| 943 | 6 | 7 | 2 | 4 | 7 | 2.5 | 12 |
| 943 | 5 | 6 | 1 | 4 | 5 | 3   | 5  |
| 944 | 5 | 5 | 1 | 7 | 5 | 5.5 | 5  |
| 944 | 5 | 7 | 1 | 2 | 4 | 2.5 | 5  |
| 944 | 5 | 1 | 6 | 2 | 1 | 2.5 | 30 |
| 944 | 3 | 4 | 1 | 4 | 2 | 3.5 | 3  |
| 944 | 4 | 6 | 4 | 6 | 2 | 4   | 16 |
| 944 | 4 | 4 | 4 | 5 | 2 | 2   | 16 |
| 944 | 5 | 7 | 7 | 6 | 6 | 3   | 35 |
| 944 | 5 | 5 | 1 | 4 | 2 | 2.5 | 5  |
| 944 | 5 | 1 | 2 | 5 | 3 | 2   | 10 |
| 944 | 3 | 4 | 1 | 3 | 2 | 4.5 | 3  |
| 944 | 4 | 3 | 3 | 3 | 2 | 4   | 12 |
| 944 | 4 | 5 | 1 | 2 | 7 | 2.5 | 4  |
| 944 | 5 | 4 | 1 | 4 | 1 | 2   | 5  |
| 944 | 5 | 6 | 5 | 4 | 5 | 5.5 | 25 |
| 944 | 5 | 3 | 4 | 3 | 2 | 4.5 | 20 |
| 944 | 3 | 5 | 1 | 3 | 4 | 3   | 3  |
| 944 | 4 | 3 | 1 | 4 | 3 | 3.5 | 4  |
| 944 | 4 | 1 | 1 | 1 | 2 | 1   | 4  |
| 944 | 5 | 3 | 5 | 3 | 3 | 4   | 25 |
| 944 | 3 | 2 | 1 | 2 | 5 | 5   | 3  |
| 945 | 2 | 6 | 6 | 7 | 2 | 1   | 12 |
| 945 | 7 | 6 | 4 | 6 | 7 | 5   | 28 |
| 945 | 7 | 1 | 2 | 1 | 1 | 5.5 | 14 |
| 945 | 3 | 5 | 5 | 5 | 3 | 4   | 15 |
| 945 | 7 | 6 | 6 | 7 | 4 | 5.5 | 42 |
| 945 | 7 | 1 | 1 | 7 | 2 | 4   | 7  |
| 945 | 2 | 6 | 3 | 6 | 3 | 2.5 | 6  |
| 945 | 7 | 3 | 4 | 4 | 4 | 6   | 28 |
| 945 | 7 | 1 | 2 | 3 | 4 | 5.5 | 14 |
| 945 | 3 | 5 | 3 | 5 | 5 | 5   | 9  |
| 945 | 7 | 3 | 6 | 4 | 4 | 5.5 | 42 |
| 945 | 7 | 1 | 2 | 5 | 7 | 3.5 | 14 |
| 945 | 2 | 6 | 1 | 2 | 1 | 3.5 | 2  |
| 945 | 7 | 6 | 5 | 5 | 3 | 6.5 | 35 |
| 945 | 7 | 5 | 5 | 5 | 4 | 4   | 35 |
| 945 | 3 | 5 | 2 | 4 | 5 | 2   | 6  |
| 945 | 7 | 6 | 2 | 3 | 5 | 3.5 | 14 |
| 945 | 7 | 1 | 2 | 3 | 5 | 2   | 14 |
| 945 | 7 | 2 | 2 | 3 | 7 | 4.5 | 14 |

brand extension data

|     |   |   |   |   |   |     |    |
|-----|---|---|---|---|---|-----|----|
| 945 | 3 | 3 | 2 | 2 | 3 | 4   | 6  |
| 946 | 5 | 7 | 7 | 7 | 7 | 3.5 | 35 |
| 946 | 7 | 7 | 7 | 7 | 7 | 5.5 | 49 |
| 946 | 7 | 1 | 7 | 1 | 1 | 7   | 49 |
| 946 | 5 | 7 | 7 | 6 | 4 | 5   | 35 |
| 946 | 5 | 7 | 4 | 7 | 5 | 5.5 | 20 |
| 946 | 5 | 1 | 7 | 7 | 1 | 1   | 35 |
| 946 | 5 | 7 | 7 | 5 | 5 | 3   | 35 |
| 946 | 7 | 7 | 1 | 6 | 7 | 6.5 | 7  |
| 946 | 7 | 1 | 1 | 7 | 3 | 4.5 | 7  |
| 946 | 5 | 7 | 7 | 6 | 5 | 5.5 | 35 |
| 946 | 5 | 4 | 5 | 5 | 2 | 6   | 25 |
| 946 | 5 | 1 | 7 | 1 | 5 | 1   | 35 |
| 946 | 5 | 7 | 1 | 1 | 1 | 1   | 5  |
| 946 | 7 | 7 | 4 | 6 | 6 | 6   | 28 |
| 946 | 7 | 1 | 4 | 1 | 3 | 6.5 | 28 |
| 946 | 5 | 7 | 7 | 6 | 7 | 5   | 35 |
| 946 | 5 | 7 | 5 | 7 | 4 | 6.5 | 25 |
| 946 | 5 | 1 | 7 | 1 | 7 | 1   | 35 |
| 946 | 7 | 7 | 6 | 6 | 7 | 6.5 | 42 |
| 946 | 5 | 5 | 1 | 5 | 6 | 7   | 5  |
| 947 | 6 | 7 | 7 | 7 | 4 | 5   | 42 |
| 947 | 7 | 6 | 1 | 3 | 7 | 5.5 | 7  |
| 947 | 6 | 2 | 5 | 2 | 1 | 4   | 30 |
| 947 | 2 | 6 | 1 | 5 | 4 | 2.5 | 2  |
| 947 | 6 | 6 | 2 | 7 | 2 | 5   | 12 |
| 947 | 4 | 3 | 5 | 7 | 3 | 6.5 | 20 |
| 947 | 6 | 7 | 5 | 5 | 5 | 2.5 | 30 |
| 947 | 7 | 5 | 1 | 3 | 4 | 6   | 7  |
| 947 | 6 | 2 | 3 | 6 | 3 | 6   | 18 |
| 947 | 2 | 6 | 1 | 5 | 5 | 1.5 | 2  |
| 947 | 6 | 4 | 4 | 5 | 3 | 3.5 | 24 |
| 947 | 4 | 5 | 2 | 1 | 7 | 2.5 | 8  |
| 947 | 6 | 7 | 1 | 2 | 1 | 2.5 | 6  |
| 947 | 7 | 7 | 1 | 4 | 4 | 6   | 7  |
| 947 | 6 | 4 | 7 | 6 | 3 | 4.5 | 42 |
| 947 | 2 | 7 | 1 | 4 | 5 | 2.5 | 2  |
| 947 | 6 | 5 | 1 | 4 | 3 | 5.5 | 6  |
| 947 | 4 | 1 | 1 | 1 | 5 | 2   | 4  |
| 947 | 7 | 4 | 3 | 3 | 6 | 6   | 21 |
| 947 | 2 | 7 | 1 | 2 | 4 | 3   | 2  |
| 948 | 5 | 6 | 5 | 7 | 4 | 5.5 | 25 |
| 948 | 6 | 6 | 2 | 3 | 6 | 2.5 | 12 |
| 948 | 5 | 2 | 6 | 1 | 3 | 2   | 30 |
| 948 | 6 | 5 | 7 | 5 | 6 | 3   | 42 |
| 948 | 5 | 7 | 2 | 7 | 3 | 3   | 10 |
| 948 | 3 | 1 | 5 | 6 | 3 | 4   | 15 |
| 948 | 5 | 5 | 6 | 3 | 5 | 1.5 | 30 |
| 948 | 6 | 5 | 3 | 3 | 4 | 5.5 | 18 |
| 948 | 5 | 2 | 5 | 5 | 3 | 2.5 | 25 |
| 948 | 6 | 3 | 4 | 4 | 6 | 3   | 24 |

brand extension data

|     |   |   |   |   |   |     |    |
|-----|---|---|---|---|---|-----|----|
| 948 | 5 | 3 | 3 | 5 | 3 | 2   | 15 |
| 948 | 3 | 5 | 3 | 2 | 4 | 3.5 | 9  |
| 948 | 5 | 6 | 1 | 2 | 3 | 2.5 | 5  |
| 948 | 6 | 5 | 3 | 3 | 4 | 3.5 | 18 |
| 948 | 5 | 1 | 7 | 5 | 5 | 5   | 35 |
| 948 | 6 | 4 | 4 | 5 | 7 | 5   | 24 |
| 948 | 5 | 5 | 3 | 4 | 3 | 3.5 | 15 |
| 948 | 3 | 3 | 4 | 1 | 4 | 2.5 | 12 |
| 948 | 6 | 5 | 2 | 3 | 5 | 4   | 12 |
| 948 | 6 | 4 | 4 | 1 | 4 | 4   | 24 |
| 949 | 5 | 1 | 7 | 5 | 3 | 4.5 | 35 |
| 949 | 4 | 6 | 1 | 1 | 5 | 4   | 4  |
| 949 | 5 | 4 | 3 | 3 | 3 | 5.5 | 15 |
| 949 | 4 | 4 | 1 | 4 | 5 | 3   | 4  |
| 949 | 5 | 7 | 1 | 6 | 4 | 5   | 5  |
| 949 | 4 | 1 | 3 | 6 | 3 | 4   | 12 |
| 949 | 5 | 1 | 3 | 3 | 4 | 4   | 15 |
| 949 | 4 | 6 | 1 | 2 | 3 | 3.5 | 4  |
| 949 | 5 | 2 | 1 | 4 | 2 | 2   | 5  |
| 949 | 4 | 3 | 1 | 3 | 4 | 3.5 | 4  |
| 949 | 5 | 1 | 1 | 1 | 4 | 2   | 5  |
| 949 | 4 | 5 | 1 | 2 | 5 | 2   | 4  |
| 949 | 5 | 1 | 1 | 1 | 3 | 1.5 | 5  |
| 949 | 4 | 4 | 1 | 2 | 5 | 3   | 4  |
| 949 | 5 | 4 | 6 | 3 | 3 | 3.5 | 30 |
| 949 | 4 | 3 | 1 | 4 | 4 | 2   | 4  |
| 949 | 5 | 1 | 1 | 2 | 3 | 1.5 | 5  |
| 949 | 4 | 1 | 1 | 2 | 5 | 1   | 4  |
| 949 | 4 | 3 | 1 | 1 | 6 | 3.5 | 4  |
| 949 | 4 | 3 | 1 | 1 | 5 | 2.5 | 4  |
| 950 | 5 | 6 | 6 | 5 | 6 | 4   | 30 |
| 950 | 6 | 6 | 2 | 2 | 6 | 5.5 | 12 |
| 950 | 6 | 2 | 6 | 4 | 2 | 4   | 36 |
| 950 | 5 | 3 | 1 | 4 | 5 | 3   | 5  |
| 950 | 6 | 5 | 2 | 5 | 5 | 5.5 | 12 |
| 950 | 3 | 1 | 5 | 6 | 3 | 3.5 | 15 |
| 950 | 5 | 2 | 6 | 3 | 6 | 2.5 | 30 |
| 950 | 6 | 6 | 4 | 2 | 6 | 4.5 | 24 |
| 950 | 6 | 1 | 2 | 6 | 2 | 2.5 | 12 |
| 950 | 5 | 1 | 1 | 3 | 5 | 4.5 | 5  |
| 950 | 6 | 2 | 2 | 3 | 5 | 2.5 | 12 |
| 950 | 3 | 5 | 2 | 2 | 7 | 6   | 6  |
| 950 | 5 | 3 | 1 | 1 | 2 | 2   | 5  |
| 950 | 6 | 4 | 4 | 2 | 6 | 6   | 24 |
| 950 | 6 | 2 | 6 | 4 | 4 | 5.5 | 36 |
| 950 | 5 | 2 | 1 | 2 | 6 | 3.5 | 5  |
| 950 | 6 | 3 | 3 | 3 | 5 | 3.5 | 18 |
| 950 | 3 | 1 | 1 | 1 | 7 | 4   | 3  |
| 950 | 6 | 5 | 2 | 2 | 6 | 5.5 | 12 |
| 950 | 5 | 1 | 1 | 1 | 6 | 5   | 5  |
| 951 | 5 | 5 | 7 | 7 | 5 | 5.5 | 35 |

brand extension data

|     |   |   |   |   |   |     |    |
|-----|---|---|---|---|---|-----|----|
| 951 | 7 | 7 | 1 | 1 | 7 | 6.5 | 7  |
| 951 | 6 | 2 | 2 | 1 | 2 | 5   | 12 |
| 951 | 5 | 7 | 1 | 4 | 3 | 6   | 5  |
| 951 | 4 | 5 | 1 | 5 | 2 | 5.5 | 4  |
| 951 | 5 | 1 | 2 | 7 | 2 | 6   | 10 |
| 951 | 5 | 3 | 4 | 5 | 6 | 4.5 | 20 |
| 951 | 7 | 5 | 1 | 1 | 6 | 4.5 | 7  |
| 951 | 6 | 1 | 2 | 3 | 4 | 4.5 | 12 |
| 951 | 5 | 5 | 1 | 3 | 2 | 6   | 5  |
| 951 | 4 | 2 | 1 | 2 | 3 | 4.5 | 4  |
| 951 | 5 | 2 | 1 | 3 | 6 | 5.5 | 5  |
| 951 | 5 | 5 | 1 | 1 | 2 | 4   | 5  |
| 951 | 7 | 6 | 1 | 1 | 5 | 6.5 | 7  |
| 951 | 6 | 4 | 5 | 4 | 4 | 5.5 | 30 |
| 951 | 5 | 6 | 1 | 2 | 3 | 6   | 5  |
| 951 | 4 | 4 | 1 | 4 | 3 | 5   | 4  |
| 951 | 5 | 1 | 1 | 1 | 6 | 3.5 | 5  |
| 951 | 7 | 7 | 1 | 1 | 6 | 3.5 | 7  |
| 951 | 5 | 5 | 1 | 1 | 5 | 4.5 | 5  |
| 952 | 5 | 3 | 4 | 4 | 5 | 2.5 | 20 |
| 952 | 5 | 5 | 3 | 2 | 5 | 3   | 15 |
| 952 | 5 | 2 | 2 | 1 | 4 | 2.5 | 10 |
| 952 | 5 | 5 | 2 | 3 | 5 | 3.5 | 10 |
| 952 | 5 | 5 | 3 | 3 | 5 | 4   | 15 |
| 952 | 4 | 2 | 2 | 3 | 5 | 3.5 | 8  |
| 952 | 5 | 3 | 4 | 4 | 5 | 2.5 | 20 |
| 952 | 5 | 4 | 3 | 2 | 4 | 3   | 15 |
| 952 | 5 | 1 | 1 | 1 | 4 | 2   | 5  |
| 952 | 5 | 4 | 2 | 3 | 5 | 4.5 | 10 |
| 952 | 5 | 1 | 1 | 1 | 5 | 2.5 | 5  |
| 952 | 4 | 2 | 3 | 2 | 6 | 5.5 | 12 |
| 952 | 5 | 2 | 2 | 1 | 4 | 2.5 | 10 |
| 952 | 5 | 5 | 4 | 3 | 5 | 3.5 | 20 |
| 952 | 5 | 3 | 3 | 3 | 4 | 4   | 15 |
| 952 | 5 | 5 | 2 | 3 | 5 | 3.5 | 10 |
| 952 | 5 | 4 | 3 | 2 | 5 | 3.5 | 15 |
| 952 | 4 | 2 | 1 | 1 | 5 | 2   | 4  |
| 952 | 5 | 4 | 4 | 2 | 6 | 3   | 20 |
| 952 | 5 | 3 | 1 | 3 | 5 | 3.5 | 5  |
| 953 | 5 | 6 | 4 | 7 | 2 | 4.5 | 20 |
| 953 | 6 | 7 | 3 | 4 | 4 | 4   | 18 |
| 953 | 5 | 4 | 5 | 4 | 1 | 2.5 | 25 |
| 953 | 4 | 6 | 2 | 5 | 3 | 3   | 8  |
| 953 | 5 | 6 | 5 | 6 | 3 | 4.5 | 25 |
| 953 | 5 | 3 | 4 | 5 | 2 | 1.5 | 20 |
| 953 | 5 | 7 | 3 | 5 | 2 | 2.5 | 15 |
| 953 | 6 | 6 | 3 | 4 | 3 | 3.5 | 18 |
| 953 | 5 | 3 | 5 | 5 | 2 | 2.5 | 25 |
| 953 | 4 | 5 | 2 | 6 | 3 | 4.5 | 8  |
| 953 | 5 | 6 | 6 | 4 | 2 | 4   | 30 |
| 953 | 5 | 5 | 2 | 1 | 5 | 3   | 10 |

brand extension data

|     |   |   |   |   |   |     |    |
|-----|---|---|---|---|---|-----|----|
| 953 | 5 | 7 | 2 | 3 | 1 | 1.5 | 10 |
| 953 | 6 | 7 | 4 | 5 | 4 | 5.5 | 24 |
| 953 | 5 | 5 | 6 | 6 | 2 | 5.5 | 30 |
| 953 | 4 | 5 | 4 | 5 | 3 | 5.5 | 16 |
| 953 | 5 | 7 | 2 | 6 | 3 | 6   | 10 |
| 953 | 5 | 1 | 1 | 1 | 5 | 3   | 5  |
| 953 | 6 | 6 | 3 | 5 | 4 | 3.5 | 18 |
| 953 | 4 | 4 | 4 | 2 | 4 | 4.5 | 16 |
| 954 | 5 | 4 | 5 | 6 | 4 | 2.5 | 25 |
| 954 | 6 | 6 | 3 | 3 | 6 | 4   | 18 |
| 954 | 6 | 4 | 2 | 4 | 1 | 4   | 12 |
| 954 | 6 | 4 | 4 | 6 | 4 | 5.5 | 24 |
| 954 | 7 | 5 | 5 | 7 | 3 | 4.5 | 35 |
| 954 | 4 | 4 | 3 | 4 | 2 | 1.5 | 12 |
| 954 | 5 | 6 | 2 | 4 | 5 | 2   | 10 |
| 954 | 6 | 6 | 3 | 5 | 6 | 6   | 18 |
| 954 | 6 | 1 | 1 | 1 | 1 | 1   | 6  |
| 954 | 6 | 4 | 3 | 6 | 4 | 4   | 18 |
| 954 | 7 | 1 | 1 | 1 | 2 | 1   | 7  |
| 954 | 4 | 3 | 2 | 1 | 7 | 2.5 | 8  |
| 954 | 5 | 3 | 1 | 3 | 1 | 2   | 5  |
| 954 | 6 | 6 | 4 | 4 | 5 | 6.5 | 24 |
| 954 | 6 | 5 | 5 | 5 | 1 | 5   | 30 |
| 954 | 6 | 1 | 2 | 4 | 5 | 4   | 12 |
| 954 | 7 | 3 | 3 | 4 | 3 | 2.5 | 21 |
| 954 | 4 | 1 | 1 | 1 | 7 | 1   | 4  |
| 954 | 6 | 6 | 5 | 6 | 7 | 7   | 30 |
| 954 | 6 | 2 | 1 | 1 | 5 | 4   | 6  |
| 955 | 5 | 7 | 7 | 7 | 2 | 3   | 35 |
| 955 | 6 | 7 | 1 | 4 | 4 | 5.5 | 6  |
| 955 | 6 | 5 | 7 | 6 | 1 | 5.5 | 42 |
| 955 | 4 | 6 | 4 | 6 | 1 | 4   | 16 |
| 955 | 4 | 7 | 6 | 7 | 1 | 5   | 24 |
| 955 | 4 | 7 | 5 | 7 | 1 | 5   | 20 |
| 955 | 5 | 7 | 6 | 6 | 3 | 3   | 30 |
| 955 | 6 | 5 | 1 | 5 | 2 | 5   | 6  |
| 955 | 6 | 4 | 6 | 4 | 1 | 3.5 | 36 |
| 955 | 4 | 5 | 4 | 6 | 1 | 2.5 | 16 |
| 955 | 4 | 4 | 3 | 5 | 1 | 4   | 12 |
| 955 | 4 | 4 | 1 | 6 | 3 | 5   | 4  |
| 955 | 5 | 7 | 1 | 6 | 1 | 2.5 | 5  |
| 955 | 6 | 6 | 4 | 5 | 2 | 5   | 24 |
| 955 | 6 | 5 | 6 | 6 | 1 | 5   | 36 |
| 955 | 4 | 6 | 5 | 5 | 2 | 2   | 20 |
| 955 | 4 | 5 | 2 | 6 | 1 | 3   | 8  |
| 955 | 4 | 2 | 1 | 1 | 3 | 3   | 4  |
| 955 | 6 | 5 | 1 | 6 | 3 | 5   | 6  |
| 955 | 4 | 4 | 1 | 3 | 2 | 1.5 | 4  |
| 956 | 6 | 7 | 7 | 7 | 3 | 4.5 | 42 |
| 956 | 7 | 7 | 2 | 6 | 4 | 5   | 14 |
| 956 | 7 | 3 | 6 | 2 | 1 | 2.5 | 42 |

brand extension data

|     |   |   |   |   |   |     |    |
|-----|---|---|---|---|---|-----|----|
| 956 | 1 | 5 | 2 | 6 | 5 | 3   | 2  |
| 956 | 6 | 7 | 1 | 7 | 5 | 6   | 6  |
| 956 | 3 | 1 | 6 | 2 | 2 | 2   | 18 |
| 956 | 6 | 7 | 7 | 5 | 3 | 2   | 42 |
| 956 | 7 | 5 | 5 | 2 | 4 | 2   | 35 |
| 956 | 7 | 4 | 5 | 3 | 3 | 3   | 35 |
| 956 | 6 | 3 | 4 | 2 | 3 | 4   | 24 |
| 956 | 3 | 6 | 6 | 7 | 6 | 5.5 | 18 |
| 956 | 6 | 7 | 3 | 2 | 1 | 3   | 18 |
| 956 | 7 | 7 | 2 | 6 | 5 | 5   | 14 |
| 956 | 7 | 3 | 4 | 2 | 3 | 2   | 28 |
| 956 | 1 | 6 | 3 | 5 | 6 | 2.5 | 3  |
| 956 | 6 | 6 | 2 | 7 | 5 | 4.5 | 12 |
| 956 | 3 | 1 | 1 | 1 | 7 | 1   | 3  |
| 956 | 7 | 4 | 3 | 6 | 3 | 2   | 21 |
| 956 | 1 | 2 | 6 | 2 | 5 | 3.5 | 6  |
| 957 | 6 | 2 | 6 | 7 | 6 | 5.5 | 36 |
| 957 | 7 | 7 | 1 | 4 | 7 | 6   | 7  |
| 957 | 4 | 2 | 6 | 1 | 2 | 2.5 | 24 |
| 957 | 6 | 7 | 4 | 6 | 7 | 6   | 24 |
| 957 | 7 | 5 | 7 | 6 | 4 | 6.5 | 49 |
| 957 | 4 | 1 | 5 | 7 | 2 | 6   | 20 |
| 957 | 6 | 2 | 5 | 4 | 7 | 4.5 | 30 |
| 957 | 7 | 4 | 2 | 2 | 4 | 4   | 14 |
| 957 | 4 | 2 | 5 | 6 | 3 | 3.5 | 20 |
| 957 | 6 | 2 | 2 | 5 | 5 | 5.5 | 12 |
| 957 | 7 | 1 | 6 | 3 | 2 | 4   | 42 |
| 957 | 4 | 6 | 1 | 1 | 7 | 5   | 4  |
| 957 | 6 | 6 | 2 | 1 | 2 | 2   | 12 |
| 957 | 7 | 7 | 2 | 5 | 4 | 5   | 14 |
| 957 | 4 | 4 | 7 | 5 | 4 | 4.5 | 28 |
| 957 | 6 | 6 | 2 | 5 | 7 | 4.5 | 12 |
| 957 | 7 | 7 | 2 | 4 | 2 | 4   | 14 |
| 957 | 4 | 1 | 1 | 1 | 6 | 1.5 | 4  |
| 957 | 7 | 6 | 2 | 1 | 5 | 5.5 | 14 |
| 957 | 6 | 2 | 2 | 2 | 4 | 2.5 | 12 |
| 958 | 5 | 7 | 7 | 7 | 5 | 3   | 35 |
| 958 | 7 | 7 | 1 | 4 | 7 | 2.5 | 7  |
| 958 | 7 | 4 | 2 | 1 | 1 | 2   | 14 |
| 958 | 5 | 4 | 6 | 6 | 6 | 3   | 30 |
| 958 | 5 | 5 | 6 | 7 | 5 | 5   | 30 |
| 958 | 3 | 2 | 2 | 6 | 1 | 2   | 6  |
| 958 | 5 | 7 | 3 | 5 | 7 | 1   | 15 |
| 958 | 7 | 6 | 5 | 3 | 4 | 5.5 | 35 |
| 958 | 7 | 3 | 1 | 5 | 1 | 1   | 7  |
| 958 | 5 | 6 | 5 | 6 | 6 | 5   | 25 |
| 958 | 5 | 3 | 4 | 3 | 5 | 1.5 | 20 |
| 958 | 3 | 1 | 1 | 1 | 7 | 2.5 | 3  |
| 958 | 5 | 5 | 1 | 1 | 1 | 1   | 5  |
| 958 | 7 | 7 | 6 | 5 | 7 | 6   | 42 |
| 958 | 7 | 7 | 7 | 4 | 3 | 7   | 49 |

brand extension data

|     |   |   |   |   |   |     |    |
|-----|---|---|---|---|---|-----|----|
| 958 | 5 | 3 | 3 | 6 | 6 | 2   | 15 |
| 958 | 5 | 3 | 3 | 6 | 5 | 2   | 15 |
| 958 | 3 | 2 | 2 | 2 | 6 | 1   | 6  |
| 958 | 7 | 4 | 4 | 4 | 7 | 2   | 28 |
| 958 | 5 | 4 | 1 | 1 | 7 | 1   | 5  |
| 959 | 5 | 4 | 1 | 7 | 5 | 4   | 5  |
| 959 | 5 | 7 | 7 | 4 | 6 | 2   | 35 |
| 959 | 4 | 1 | 7 | 2 | 1 | 3   | 28 |
| 959 | 4 | 5 | 7 | 1 | 3 | 1.5 | 28 |
| 959 | 7 | 5 | 4 | 4 | 3 | 2   | 28 |
| 959 | 4 | 1 | 4 | 7 | 1 | 6   | 16 |
| 959 | 5 | 4 | 4 | 2 | 6 | 1.5 | 20 |
| 959 | 5 | 7 | 7 | 4 | 1 | 2   | 35 |
| 959 | 4 | 2 | 7 | 4 | 1 | 1   | 28 |
| 959 | 4 | 4 | 7 | 1 | 6 | 1   | 28 |
| 959 | 7 | 6 | 4 | 1 | 2 | 1   | 28 |
| 959 | 4 | 4 | 7 | 3 | 4 | 2.5 | 28 |
| 959 | 5 | 7 | 7 | 2 | 1 | 2.5 | 35 |
| 959 | 5 | 7 | 7 | 4 | 1 | 4.5 | 35 |
| 959 | 4 | 4 | 7 | 2 | 2 | 3.5 | 28 |
| 959 | 4 | 1 | 7 | 1 | 7 | 1.5 | 28 |
| 959 | 7 | 6 | 7 | 1 | 3 | 1   | 49 |
| 959 | 4 | 1 | 7 | 1 | 5 | 1   | 28 |
| 959 | 5 | 7 | 7 | 2 | 2 | 1   | 35 |
| 959 | 4 | 1 | 7 | 1 | 1 | 2.5 | 28 |
| 960 | 6 | 7 | 6 | 6 | 5 | 5.5 | 36 |
| 960 | 4 | 7 | 2 | 2 | 5 | 3   | 8  |
| 960 | 7 | 2 | 5 | 2 | 1 | 1.5 | 35 |
| 960 | 5 | 6 | 2 | 4 | 3 | 4.5 | 10 |
| 960 | 6 | 7 | 6 | 7 | 2 | 5.5 | 36 |
| 960 | 6 | 6 | 7 | 7 | 1 | 7   | 42 |
| 960 | 6 | 6 | 5 | 4 | 5 | 4   | 30 |
| 960 | 4 | 2 | 2 | 3 | 2 | 3   | 8  |
| 960 | 7 | 2 | 1 | 4 | 2 | 4.5 | 7  |
| 960 | 5 | 4 | 2 | 3 | 3 | 2   | 10 |
| 960 | 6 | 3 | 2 | 2 | 3 | 2   | 12 |
| 960 | 6 | 6 | 1 | 3 | 6 | 5.5 | 6  |
| 960 | 6 | 7 | 3 | 2 | 1 | 3   | 18 |
| 960 | 4 | 6 | 3 | 2 | 3 | 4.5 | 12 |
| 960 | 7 | 6 | 6 | 5 | 3 | 7   | 42 |
| 960 | 5 | 5 | 2 | 2 | 4 | 1.5 | 10 |
| 960 | 6 | 5 | 1 | 2 | 2 | 1   | 6  |
| 960 | 6 | 3 | 1 | 2 | 3 | 2   | 6  |
| 960 | 4 | 5 | 4 | 2 | 3 | 5.5 | 16 |
| 960 | 5 | 2 | 1 | 1 | 3 | 2.5 | 5  |
| 961 | 5 | 5 | 6 | 7 | 4 | 6   | 30 |
| 961 | 5 | 7 | 6 | 5 | 6 | 5   | 30 |
| 961 | 7 | 5 | 1 | 3 | 1 | 2.5 | 7  |
| 961 | 5 | 7 | 6 | 6 | 3 | 5   | 30 |
| 961 | 4 | 5 | 7 | 6 | 2 | 7   | 28 |
| 961 | 2 | 2 | 6 | 7 | 1 | 5   | 12 |

brand extension data

|     |   |   |   |   |   |     |    |
|-----|---|---|---|---|---|-----|----|
| 961 | 5 | 5 | 3 | 5 | 6 | 3   | 15 |
| 961 | 5 | 3 | 2 | 2 | 4 | 1.5 | 10 |
| 961 | 7 | 1 | 2 | 5 | 1 | 1   | 14 |
| 961 | 5 | 3 | 5 | 4 | 2 | 4   | 25 |
| 961 | 4 | 1 | 2 | 3 | 3 | 2.5 | 8  |
| 961 | 2 | 6 | 2 | 2 | 7 | 5   | 4  |
| 961 | 5 | 6 | 1 | 2 | 1 | 1   | 5  |
| 961 | 5 | 3 | 4 | 5 | 6 | 4.5 | 20 |
| 961 | 7 | 7 | 6 | 5 | 1 | 6.5 | 42 |
| 961 | 5 | 5 | 2 | 5 | 6 | 1   | 10 |
| 961 | 4 | 5 | 3 | 5 | 3 | 4   | 12 |
| 961 | 2 | 1 | 1 | 1 | 7 | 3   | 2  |
| 961 | 5 | 2 | 3 | 4 | 6 | 4.5 | 15 |
| 961 | 5 | 1 | 1 | 1 | 6 | 1.5 | 5  |
| 962 | 5 | 6 | 5 | 5 | 3 | 3.5 | 25 |
| 962 | 6 | 2 | 2 | 2 | 6 | 4   | 12 |
| 962 | 5 | 5 | 5 | 3 | 2 | 3.5 | 25 |
| 962 | 4 | 4 | 5 | 5 | 5 | 5   | 20 |
| 962 | 5 | 4 | 5 | 6 | 4 | 5   | 25 |
| 962 | 3 | 5 | 5 | 6 | 2 | 4   | 15 |
| 962 | 5 | 3 | 3 | 3 | 5 | 2.5 | 15 |
| 962 | 6 | 5 | 4 | 3 | 5 | 5   | 24 |
| 962 | 5 | 2 | 2 | 2 | 2 | 4   | 10 |
| 962 | 4 | 2 | 3 | 4 | 4 | 5   | 12 |
| 962 | 5 | 2 | 3 | 4 | 2 | 3   | 15 |
| 962 | 3 | 5 | 2 | 5 | 5 | 4.5 | 6  |
| 962 | 5 | 2 | 2 | 2 | 2 | 3   | 10 |
| 962 | 6 | 4 | 5 | 3 | 5 | 5.5 | 30 |
| 962 | 5 | 4 | 4 | 3 | 2 | 3   | 20 |
| 962 | 4 | 4 | 4 | 5 | 5 | 4   | 16 |
| 962 | 5 | 2 | 2 | 2 | 2 | 2.5 | 10 |
| 962 | 3 | 2 | 2 | 1 | 4 | 2.5 | 6  |
| 962 | 6 | 4 | 4 | 4 | 6 | 5   | 24 |
| 962 | 4 | 2 | 3 | 3 | 5 | 4.5 | 12 |
| 963 | 6 | 7 | 7 | 7 | 6 | 5.5 | 42 |
| 963 | 3 | 2 | 2 | 1 | 5 | 2.5 | 6  |
| 963 | 5 | 5 | 3 | 1 | 2 | 2.5 | 15 |
| 963 | 2 | 4 | 2 | 2 | 4 | 3.5 | 4  |
| 963 | 3 | 6 | 4 | 2 | 1 | 2.5 | 12 |
| 963 | 1 | 4 | 1 | 6 | 1 | 2   | 1  |
| 963 | 6 | 7 | 6 | 4 | 5 | 3   | 36 |
| 963 | 3 | 4 | 4 | 1 | 4 | 2.5 | 12 |
| 963 | 5 | 4 | 4 | 2 | 3 | 4.5 | 20 |
| 963 | 2 | 2 | 2 | 2 | 4 | 5   | 4  |
| 963 | 3 | 1 | 2 | 1 | 3 | 1.5 | 6  |
| 963 | 1 | 5 | 3 | 1 | 5 | 5.5 | 3  |
| 963 | 6 | 5 | 2 | 1 | 2 | 2   | 12 |
| 963 | 3 | 4 | 2 | 1 | 6 | 2.5 | 6  |
| 963 | 5 | 5 | 6 | 3 | 3 | 6   | 30 |
| 963 | 2 | 2 | 2 | 2 | 5 | 3   | 4  |
| 963 | 3 | 1 | 2 | 2 | 3 | 1.5 | 6  |

brand extension data

|     |   |   |   |   |   |     |    |
|-----|---|---|---|---|---|-----|----|
| 963 | 1 | 1 | 1 | 1 | 2 | 1   | 1  |
| 963 | 3 | 4 | 1 | 1 | 7 | 1.5 | 3  |
| 963 | 2 | 5 | 2 | 1 | 6 | 4   | 4  |
| 964 | 5 | 5 | 6 | 7 | 6 | 5.5 | 30 |
| 964 | 4 | 7 | 3 | 3 | 6 | 2   | 12 |
| 964 | 7 | 1 | 4 | 1 | 1 | 3.5 | 28 |
| 964 | 5 | 6 | 2 | 6 | 5 | 4   | 10 |
| 964 | 4 | 7 | 6 | 6 | 4 | 6.5 | 24 |
| 964 | 5 | 7 | 7 | 7 | 3 | 7   | 35 |
| 964 | 5 | 3 | 2 | 4 | 7 | 5.5 | 10 |
| 964 | 4 | 2 | 1 | 1 | 2 | 3.5 | 4  |
| 964 | 7 | 1 | 6 | 4 | 4 | 4.5 | 42 |
| 964 | 5 | 2 | 1 | 5 | 5 | 3   | 5  |
| 964 | 4 | 4 | 2 | 5 | 4 | 3.5 | 8  |
| 964 | 5 | 7 | 3 | 2 | 7 | 5.5 | 15 |
| 964 | 5 | 7 | 4 | 1 | 1 | 2.5 | 20 |
| 964 | 4 | 6 | 3 | 2 | 2 | 4   | 12 |
| 964 | 7 | 7 | 7 | 4 | 6 | 7   | 49 |
| 964 | 5 | 4 | 2 | 4 | 4 | 5   | 10 |
| 964 | 4 | 7 | 4 | 4 | 3 | 5   | 16 |
| 964 | 5 | 1 | 1 | 1 | 6 | 4   | 5  |
| 964 | 4 | 6 | 3 | 3 | 5 | 4   | 12 |
| 964 | 5 | 2 | 2 | 1 | 2 | 3.5 | 10 |
| 965 | 7 | 7 | 7 | 7 | 6 | 7   | 49 |
| 965 | 5 | 6 | 3 | 2 | 7 | 2   | 15 |
| 965 | 7 | 2 | 3 | 2 | 4 | 1.5 | 21 |
| 965 | 4 | 5 | 4 | 4 | 6 | 3.5 | 16 |
| 965 | 7 | 6 | 6 | 6 | 4 | 6   | 42 |
| 965 | 4 | 7 | 6 | 6 | 5 | 5   | 24 |
| 965 | 7 | 6 | 5 | 5 | 5 | 3.5 | 35 |
| 965 | 5 | 2 | 2 | 2 | 4 | 1   | 10 |
| 965 | 7 | 1 | 3 | 1 | 3 | 1.5 | 21 |
| 965 | 4 | 4 | 5 | 4 | 4 | 4   | 20 |
| 965 | 7 | 3 | 4 | 4 | 4 | 1.5 | 28 |
| 965 | 4 | 3 | 3 | 1 | 4 | 1   | 12 |
| 965 | 7 | 4 | 3 | 2 | 4 | 1   | 21 |
| 965 | 5 | 2 | 2 | 2 | 7 | 2   | 10 |
| 965 | 7 | 6 | 6 | 5 | 4 | 5   | 42 |
| 965 | 4 | 3 | 3 | 1 | 7 | 2   | 12 |
| 965 | 7 | 4 | 4 | 3 | 3 | 3.5 | 28 |
| 965 | 4 | 1 | 1 | 1 | 6 | 1   | 4  |
| 965 | 5 | 3 | 4 | 2 | 7 | 1.5 | 20 |
| 965 | 4 | 1 | 2 | 1 | 7 | 2   | 8  |
| 966 | 5 | 5 | 5 | 7 | 5 | 3.5 | 25 |
| 966 | 6 | 6 | 1 | 2 | 7 | 2   | 6  |
| 966 | 5 | 2 | 1 | 3 | 3 | 3.5 | 5  |
| 966 | 6 | 5 | 1 | 6 | 5 | 5.5 | 6  |
| 966 | 6 | 4 | 3 | 6 | 4 | 6   | 18 |
| 966 | 5 | 2 | 4 | 6 | 3 | 5   | 20 |
| 966 | 5 | 3 | 3 | 5 | 6 | 3   | 15 |
| 966 | 6 | 3 | 1 | 4 | 4 | 3.5 | 6  |

brand extension data

|     |   |   |   |   |   |     |    |
|-----|---|---|---|---|---|-----|----|
| 966 | 5 | 1 | 1 | 2 | 2 | 3.5 | 5  |
| 966 | 6 | 3 | 1 | 6 | 5 | 5.5 | 6  |
| 966 | 6 | 5 | 3 | 6 | 4 | 5.5 | 18 |
| 966 | 5 | 1 | 2 | 4 | 5 | 5   | 10 |
| 966 | 5 | 3 | 1 | 4 | 3 | 4.5 | 5  |
| 966 | 6 | 4 | 1 | 3 | 5 | 5   | 6  |
| 966 | 5 | 5 | 4 | 6 | 4 | 5.5 | 20 |
| 966 | 6 | 1 | 1 | 6 | 6 | 5   | 6  |
| 966 | 6 | 4 | 1 | 5 | 4 | 5.5 | 6  |
| 966 | 5 | 1 | 1 | 3 | 6 | 4   | 5  |
| 966 | 6 | 4 | 1 | 5 | 4 | 4   | 6  |
| 966 | 6 | 4 | 1 | 4 | 5 | 2.5 | 6  |
| 967 | 5 | 6 | 6 | 7 | 6 | 5.5 | 30 |
| 967 | 6 | 7 | 1 | 1 | 7 | 4   | 6  |
| 967 | 7 | 1 | 1 | 1 | 1 | 2.5 | 7  |
| 967 | 4 | 4 | 1 | 4 | 5 | 3   | 4  |
| 967 | 7 | 7 | 5 | 7 | 3 | 6   | 35 |
| 967 | 5 | 1 | 1 | 6 | 1 | 1   | 5  |
| 967 | 5 | 6 | 1 | 4 | 7 | 1   | 5  |
| 967 | 6 | 6 | 1 | 1 | 2 | 4.5 | 6  |
| 967 | 7 | 1 | 1 | 3 | 1 | 4   | 7  |
| 967 | 4 | 2 | 1 | 4 | 5 | 3.5 | 4  |
| 967 | 7 | 7 | 4 | 5 | 1 | 1   | 28 |
| 967 | 5 | 7 | 1 | 1 | 7 | 6.5 | 5  |
| 967 | 5 | 6 | 1 | 1 | 1 | 1.5 | 5  |
| 967 | 6 | 7 | 1 | 6 | 2 | 6   | 6  |
| 967 | 7 | 4 | 1 | 1 | 2 | 3.5 | 7  |
| 967 | 4 | 4 | 1 | 1 | 7 | 4   | 4  |
| 967 | 7 | 7 | 1 | 1 | 2 | 6   | 7  |
| 967 | 5 | 1 | 1 | 1 | 1 | 1   | 5  |
| 967 | 6 | 7 | 1 | 5 | 4 | 6   | 6  |
| 967 | 4 | 7 | 1 | 1 | 2 | 3   | 4  |
| 968 | 6 | 7 | 3 | 7 | 7 | 7   | 18 |
| 968 | 6 | 7 | 5 | 5 | 7 | 5   | 30 |
| 968 | 6 | 2 | 3 | 2 | 1 | 4.5 | 18 |
| 968 | 3 | 4 | 6 | 4 | 5 | 6.5 | 18 |
| 968 | 6 | 6 | 2 | 6 | 2 | 7   | 12 |
| 968 | 1 | 4 | 4 | 5 | 1 | 4   | 4  |
| 968 | 6 | 5 | 7 | 2 | 7 | 4.5 | 42 |
| 968 | 6 | 4 | 6 | 3 | 4 | 6   | 36 |
| 968 | 6 | 1 | 6 | 1 | 2 | 4   | 36 |
| 968 | 3 | 2 | 5 | 4 | 2 | 4   | 15 |
| 968 | 6 | 4 | 5 | 1 | 2 | 3.5 | 30 |
| 968 | 1 | 1 | 7 | 1 | 7 | 4.5 | 7  |
| 968 | 6 | 3 | 6 | 2 | 1 | 3   | 36 |
| 968 | 6 | 6 | 4 | 5 | 4 | 6   | 24 |
| 968 | 6 | 3 | 2 | 4 | 2 | 6   | 12 |
| 968 | 3 | 4 | 7 | 2 | 6 | 4   | 21 |
| 968 | 6 | 6 | 6 | 5 | 2 | 6   | 36 |
| 968 | 1 | 1 | 7 | 1 | 2 | 2.5 | 7  |
| 968 | 6 | 4 | 5 | 6 | 6 | 6.5 | 30 |

brand extension data

|     |   |   |   |   |   |     |    |
|-----|---|---|---|---|---|-----|----|
| 968 | 3 | 2 | 7 | 1 | 4 | 3.5 | 21 |
| 969 | 7 | 6 | 7 | 7 | 2 | 7   | 49 |
| 969 | 7 | 7 | 2 | 3 | 5 | 3.5 | 14 |
| 969 | 6 | 5 | 5 | 4 | 1 | 3.5 | 30 |
| 969 | 5 | 5 | 3 | 5 | 3 | 3.5 | 15 |
| 969 | 5 | 5 | 5 | 6 | 2 | 3   | 25 |
| 969 | 5 | 2 | 4 | 6 | 2 | 3.5 | 20 |
| 969 | 7 | 6 | 5 | 4 | 4 | 4.5 | 35 |
| 969 | 7 | 6 | 1 | 2 | 3 | 4.5 | 7  |
| 969 | 6 | 4 | 3 | 5 | 2 | 3.5 | 18 |
| 969 | 5 | 3 | 2 | 4 | 2 | 3   | 10 |
| 969 | 5 | 4 | 4 | 5 | 2 | 2.5 | 20 |
| 969 | 5 | 5 | 2 | 1 | 7 | 4   | 10 |
| 969 | 7 | 6 | 2 | 2 | 1 | 4.5 | 14 |
| 969 | 7 | 6 | 3 | 2 | 4 | 5.5 | 21 |
| 969 | 6 | 4 | 3 | 4 | 2 | 4.5 | 18 |
| 969 | 5 | 2 | 1 | 3 | 5 | 2.5 | 5  |
| 969 | 5 | 5 | 3 | 6 | 2 | 3.5 | 15 |
| 969 | 5 | 1 | 1 | 1 | 6 | 2   | 5  |
| 969 | 7 | 6 | 2 | 2 | 6 | 2.5 | 14 |
| 969 | 5 | 1 | 1 | 2 | 4 | 2   | 5  |
| 970 | 7 | 7 | 6 | 7 | 5 | 7   | 42 |
| 970 | 7 | 6 | 1 | 6 | 6 | 3.5 | 7  |
| 970 | 6 | 2 | 5 | 2 | 1 | 3   | 30 |
| 970 | 3 | 7 | 2 | 6 | 4 | 6   | 6  |
| 970 | 7 | 1 | 7 | 6 | 2 | 5.5 | 49 |
| 970 | 1 | 2 | 5 | 6 | 1 | 1   | 5  |
| 970 | 7 | 6 | 5 | 7 | 5 | 2.5 | 35 |
| 970 | 7 | 6 | 2 | 6 | 3 | 2   | 14 |
| 970 | 6 | 2 | 2 | 2 | 1 | 2   | 12 |
| 970 | 3 | 7 | 2 | 6 | 4 | 6   | 6  |
| 970 | 7 | 7 | 7 | 6 | 3 | 1   | 49 |
| 970 | 1 | 6 | 1 | 1 | 7 | 5   | 1  |
| 970 | 7 | 6 | 1 | 2 | 1 | 2.5 | 7  |
| 970 | 7 | 6 | 3 | 6 | 5 | 6   | 21 |
| 970 | 6 | 6 | 7 | 5 | 2 | 6.5 | 42 |
| 970 | 3 | 7 | 5 | 6 | 4 | 6   | 15 |
| 970 | 7 | 1 | 1 | 5 | 2 | 1.5 | 7  |
| 970 | 1 | 2 | 1 | 1 | 7 | 4.5 | 1  |
| 970 | 7 | 6 | 2 | 6 | 6 | 6   | 14 |
| 970 | 3 | 7 | 1 | 6 | 5 | 6.5 | 3  |
| 971 | 6 | 7 | 4 | 7 | 5 | 6.5 | 24 |
| 971 | 6 | 7 | 1 | 3 | 7 | 2   | 6  |
| 971 | 5 | 6 | 5 | 2 | 3 | 4   | 25 |
| 971 | 5 | 6 | 1 | 5 | 1 | 5.5 | 5  |
| 971 | 7 | 7 | 5 | 6 | 3 | 5.5 | 35 |
| 971 | 1 | 7 | 6 | 7 | 2 | 1   | 6  |
| 971 | 6 | 7 | 2 | 6 | 5 | 4   | 12 |
| 971 | 6 | 7 | 1 | 4 | 4 | 4   | 6  |
| 971 | 5 | 4 | 1 | 5 | 1 | 2.5 | 5  |
| 971 | 5 | 4 | 1 | 5 | 1 | 5.5 | 5  |

brand extension data

|     |   |   |   |   |   |     |    |
|-----|---|---|---|---|---|-----|----|
| 971 | 7 | 4 | 6 | 5 | 3 | 4   | 42 |
| 971 | 1 | 7 | 1 | 2 | 5 | 2   | 1  |
| 971 | 6 | 7 | 1 | 2 | 3 | 3   | 6  |
| 971 | 6 | 7 | 1 | 4 | 3 | 4.5 | 6  |
| 971 | 5 | 5 | 4 | 5 | 1 | 4   | 20 |
| 971 | 5 | 5 | 1 | 5 | 5 | 3.5 | 5  |
| 971 | 7 | 7 | 1 | 4 | 2 | 2.5 | 7  |
| 971 | 1 | 1 | 1 | 1 | 5 | 2   | 1  |
| 971 | 6 | 7 | 1 | 2 | 5 | 3.5 | 6  |
| 971 | 5 | 3 | 1 | 2 | 3 | 3   | 5  |
| 972 | 4 | 5 | 5 | 7 | 4 | 3.5 | 20 |
| 972 | 6 | 6 | 1 | 3 | 6 | 3.5 | 6  |
| 972 | 6 | 3 | 4 | 4 | 1 | 2   | 24 |
| 972 | 5 | 5 | 2 | 5 | 3 | 5   | 10 |
| 972 | 7 | 5 | 5 | 6 | 3 | 6   | 35 |
| 972 | 4 | 5 | 6 | 6 | 2 | 3.5 | 24 |
| 972 | 4 | 4 | 3 | 6 | 4 | 3.5 | 12 |
| 972 | 6 | 5 | 1 | 4 | 3 | 5.5 | 6  |
| 972 | 6 | 3 | 5 | 5 | 2 | 4.5 | 30 |
| 972 | 5 | 5 | 2 | 5 | 3 | 4   | 10 |
| 972 | 7 | 4 | 2 | 4 | 2 | 4   | 14 |
| 972 | 4 | 3 | 1 | 1 | 7 | 3   | 4  |
| 972 | 4 | 6 | 1 | 3 | 1 | 1.5 | 4  |
| 972 | 6 | 6 | 6 | 5 | 2 | 6   | 36 |
| 972 | 6 | 3 | 5 | 5 | 2 | 2   | 30 |
| 972 | 5 | 5 | 2 | 5 | 3 | 5   | 10 |
| 972 | 7 | 4 | 1 | 3 | 3 | 4.5 | 7  |
| 972 | 4 | 1 | 1 | 2 | 6 | 1.5 | 4  |
| 972 | 6 | 6 | 4 | 5 | 5 | 5.5 | 24 |
| 972 | 5 | 4 | 1 | 3 | 2 | 3.5 | 5  |
| 973 | 4 | 6 | 7 | 7 | 4 | 3   | 28 |
| 973 | 7 | 6 | 4 | 4 | 6 | 6   | 28 |
| 973 | 7 | 2 | 6 | 2 | 1 | 3.5 | 42 |
| 973 | 3 | 6 | 2 | 3 | 5 | 2.5 | 6  |
| 973 | 6 | 6 | 6 | 7 | 5 | 6.5 | 36 |
| 973 | 5 | 2 | 7 | 7 | 4 | 7   | 35 |
| 973 | 4 | 7 | 6 | 6 | 5 | 3.5 | 24 |
| 973 | 7 | 3 | 2 | 1 | 2 | 4   | 14 |
| 973 | 7 | 2 | 3 | 5 | 4 | 3.5 | 21 |
| 973 | 3 | 4 | 2 | 2 | 4 | 2.5 | 6  |
| 973 | 6 | 6 | 6 | 7 | 4 | 5   | 36 |
| 973 | 5 | 3 | 2 | 2 | 6 | 6   | 10 |
| 973 | 4 | 6 | 1 | 2 | 1 | 1.5 | 4  |
| 973 | 7 | 6 | 4 | 6 | 3 | 6   | 28 |
| 973 | 7 | 2 | 6 | 5 | 1 | 4   | 42 |
| 973 | 3 | 6 | 2 | 3 | 4 | 1.5 | 6  |
| 973 | 6 | 6 | 3 | 1 | 4 | 1.5 | 18 |
| 973 | 5 | 4 | 2 | 1 | 7 | 1   | 10 |
| 973 | 7 | 6 | 3 | 5 | 6 | 5   | 21 |
| 973 | 3 | 3 | 2 | 2 | 3 | 2   | 6  |
| 974 | 6 | 6 | 6 | 7 | 6 | 6.5 | 36 |

brand extension data

|     |   |   |   |   |   |     |    |
|-----|---|---|---|---|---|-----|----|
| 974 | 6 | 7 | 3 | 3 | 7 | 5   | 18 |
| 974 | 6 | 6 | 3 | 5 | 4 | 5.5 | 18 |
| 974 | 6 | 5 | 7 | 6 | 2 | 4.5 | 42 |
| 974 | 2 | 5 | 6 | 5 | 2 | 2   | 12 |
| 974 | 6 | 4 | 5 | 3 | 7 | 1.5 | 30 |
| 974 | 6 | 4 | 3 | 2 | 1 | 4   | 18 |
| 974 | 6 | 4 | 6 | 6 | 2 | 5   | 36 |
| 974 | 6 | 4 | 2 | 5 | 4 | 4   | 12 |
| 974 | 6 | 4 | 5 | 5 | 2 | 1.5 | 30 |
| 974 | 2 | 6 | 2 | 1 | 7 | 3   | 4  |
| 974 | 6 | 5 | 4 | 3 | 2 | 1.5 | 24 |
| 974 | 6 | 5 | 4 | 4 | 2 | 4   | 24 |
| 974 | 6 | 6 | 6 | 5 | 3 | 4   | 36 |
| 974 | 6 | 6 | 3 | 2 | 6 | 3   | 18 |
| 974 | 6 | 6 | 5 | 6 | 4 | 3   | 30 |
| 974 | 2 | 1 | 1 | 2 | 2 | 3   | 2  |
| 974 | 6 | 3 | 2 | 3 | 6 | 1.5 | 12 |
| 974 | 6 | 5 | 3 | 4 | 2 | 2.5 | 18 |
| 975 | 5 | 4 | 7 | 7 | 3 | 3.5 | 35 |
| 975 | 6 | 3 | 4 | 5 | 5 | 5   | 24 |
| 975 | 5 | 3 | 2 | 2 | 2 | 2.5 | 10 |
| 975 | 4 | 5 | 6 | 6 | 3 | 3   | 24 |
| 975 | 4 | 6 | 7 | 7 | 3 | 5   | 28 |
| 975 | 3 | 7 | 7 | 7 | 3 | 2   | 21 |
| 975 | 5 | 5 | 5 | 6 | 3 | 2.5 | 25 |
| 975 | 6 | 5 | 3 | 4 | 5 | 5   | 18 |
| 975 | 5 | 4 | 6 | 7 | 2 | 3   | 30 |
| 975 | 4 | 5 | 7 | 6 | 2 | 4   | 28 |
| 975 | 4 | 7 | 6 | 7 | 4 | 3.5 | 24 |
| 975 | 3 | 1 | 3 | 6 | 4 | 2   | 9  |
| 975 | 5 | 2 | 2 | 2 | 2 | 1   | 10 |
| 975 | 6 | 4 | 2 | 2 | 6 | 5   | 12 |
| 975 | 5 | 6 | 4 | 5 | 2 | 3.5 | 20 |
| 975 | 4 | 3 | 5 | 5 | 3 | 4   | 20 |
| 975 | 4 | 5 | 2 | 5 | 2 | 3   | 8  |
| 975 | 3 | 2 | 1 | 1 | 5 | 1.5 | 3  |
| 975 | 6 | 6 | 5 | 2 | 7 | 5   | 30 |
| 975 | 4 | 1 | 1 | 1 | 6 | 5.5 | 4  |
| 976 | 7 | 6 | 5 | 7 | 5 | 6.5 | 35 |
| 976 | 4 | 4 | 1 | 3 | 5 | 4   | 4  |
| 976 | 6 | 2 | 3 | 2 | 3 | 4   | 18 |
| 976 | 5 | 5 | 1 | 5 | 6 | 4.5 | 5  |
| 976 | 6 | 7 | 3 | 7 | 5 | 5.5 | 18 |
| 976 | 4 | 6 | 4 | 7 | 4 | 6   | 16 |
| 976 | 7 | 5 | 4 | 5 | 6 | 3.5 | 28 |
| 976 | 4 | 3 | 1 | 3 | 5 | 4   | 4  |
| 976 | 6 | 1 | 1 | 4 | 5 | 3.5 | 6  |
| 976 | 5 | 4 | 1 | 4 | 5 | 4   | 5  |
| 976 | 6 | 3 | 2 | 5 | 5 | 4.5 | 12 |
| 976 | 4 | 4 | 1 | 3 | 6 | 5.5 | 4  |
| 976 | 7 | 3 | 1 | 1 | 3 | 3.5 | 7  |

brand extension data

|     |   |   |   |   |   |     |    |
|-----|---|---|---|---|---|-----|----|
| 976 | 4 | 5 | 2 | 3 | 5 | 4.5 | 8  |
| 976 | 6 | 3 | 4 | 5 | 4 | 4.5 | 24 |
| 976 | 5 | 5 | 1 | 4 | 6 | 3   | 5  |
| 976 | 6 | 3 | 1 | 4 | 5 | 4.5 | 6  |
| 976 | 4 | 1 | 1 | 1 | 5 | 2.5 | 4  |
| 976 | 4 | 6 | 1 | 2 | 6 | 2.5 | 4  |
| 976 | 5 | 2 | 1 | 1 | 5 | 6   | 5  |
| 977 | 7 | 7 | 6 | 7 | 5 | 6   | 42 |
| 977 | 7 | 4 | 1 | 1 | 7 | 1   | 7  |
| 977 | 3 | 2 | 5 | 3 | 4 | 1   | 15 |
| 977 | 6 | 6 | 1 | 5 | 4 | 5.5 | 6  |
| 977 | 7 | 7 | 5 | 6 | 5 | 3.5 | 35 |
| 977 | 5 | 5 | 5 | 6 | 1 | 2   | 25 |
| 977 | 7 | 7 | 6 | 6 | 6 | 1.5 | 42 |
| 977 | 7 | 4 | 2 | 1 | 3 | 2   | 14 |
| 977 | 3 | 1 | 1 | 3 | 1 | 1   | 3  |
| 977 | 6 | 5 | 1 | 5 | 4 | 5   | 6  |
| 977 | 7 | 1 | 2 | 2 | 3 | 2   | 14 |
| 977 | 5 | 1 | 2 | 1 | 7 | 4.5 | 10 |
| 977 | 7 | 6 | 2 | 1 | 4 | 2   | 14 |
| 977 | 7 | 5 | 3 | 1 | 5 | 3   | 21 |
| 977 | 3 | 2 | 7 | 5 | 2 | 2.5 | 21 |
| 977 | 6 | 4 | 2 | 3 | 4 | 4   | 12 |
| 977 | 7 | 6 | 6 | 3 | 3 | 2   | 42 |
| 977 | 5 | 1 | 1 | 1 | 7 | 1.5 | 5  |
| 977 | 7 | 5 | 2 | 2 | 7 | 2   | 14 |
| 977 | 6 | 6 | 1 | 1 | 5 | 1.5 | 6  |
| 978 | 6 | 6 | 7 | 7 | 5 | 5.5 | 42 |
| 978 | 7 | 7 | 2 | 2 | 7 | 3.5 | 14 |
| 978 | 5 | 2 | 4 | 2 | 1 | 3   | 20 |
| 978 | 5 | 5 | 4 | 5 | 4 | 3   | 20 |
| 978 | 5 | 6 | 6 | 5 | 4 | 5   | 30 |
| 978 | 3 | 6 | 3 | 6 | 2 | 3.5 | 9  |
| 978 | 6 | 5 | 4 | 5 | 5 | 3   | 24 |
| 978 | 7 | 5 | 4 | 2 | 3 | 4   | 28 |
| 978 | 5 | 2 | 3 | 3 | 2 | 3   | 15 |
| 978 | 5 | 3 | 3 | 5 | 3 | 3   | 15 |
| 978 | 5 | 4 | 2 | 3 | 4 | 2.5 | 10 |
| 978 | 3 | 5 | 2 | 1 | 7 | 3.5 | 6  |
| 978 | 6 | 7 | 2 | 3 | 1 | 2.5 | 12 |
| 978 | 7 | 6 | 3 | 2 | 3 | 6   | 21 |
| 978 | 5 | 4 | 5 | 4 | 3 | 5   | 25 |
| 978 | 5 | 4 | 4 | 4 | 4 | 5   | 20 |
| 978 | 5 | 3 | 2 | 4 | 4 | 2.5 | 10 |
| 978 | 3 | 2 | 1 | 4 | 6 | 2   | 3  |
| 978 | 7 | 4 | 4 | 2 | 4 | 4   | 28 |
| 978 | 5 | 2 | 2 | 2 | 3 | 3.5 | 10 |
| 979 | 6 | 4 | 6 | 7 | 6 | 5   | 36 |
| 979 | 4 | 7 | 1 | 1 | 6 | 4.5 | 4  |
| 979 | 5 | 4 | 2 | 1 | 1 | 3.5 | 10 |
| 979 | 4 | 6 | 2 | 5 | 5 | 3.5 | 8  |

brand extension data

|     |   |   |   |   |   |     |    |
|-----|---|---|---|---|---|-----|----|
| 979 | 5 | 5 | 2 | 6 | 3 | 4.5 | 10 |
| 979 | 4 | 1 | 1 | 2 | 1 | 1   | 4  |
| 979 | 6 | 3 | 5 | 7 | 6 | 3.5 | 30 |
| 979 | 4 | 7 | 1 | 1 | 3 | 6   | 4  |
| 979 | 5 | 4 | 3 | 6 | 4 | 5.5 | 15 |
| 979 | 4 | 5 | 1 | 5 | 5 | 4.5 | 4  |
| 979 | 5 | 4 | 1 | 4 | 3 | 3   | 5  |
| 979 | 4 | 1 | 1 | 2 | 4 | 2.5 | 4  |
| 979 | 6 | 6 | 1 | 1 | 1 | 1   | 6  |
| 979 | 4 | 7 | 2 | 4 | 3 | 4   | 8  |
| 979 | 5 | 3 | 4 | 5 | 3 | 4.5 | 20 |
| 979 | 4 | 6 | 2 | 5 | 5 | 4   | 8  |
| 979 | 5 | 7 | 1 | 3 | 3 | 5   | 5  |
| 979 | 4 | 1 | 1 | 2 | 4 | 4   | 4  |
| 979 | 4 | 7 | 2 | 2 | 5 | 4   | 8  |
| 979 | 4 | 6 | 1 | 3 | 3 | 4.5 | 4  |
| 980 | 7 | 5 | 2 | 7 | 7 | 4.5 | 14 |
| 980 | 4 | 5 | 2 | 2 | 5 | 2.5 | 8  |
| 980 | 6 | 1 | 6 | 3 | 3 | 5.5 | 36 |
| 980 | 4 | 4 | 4 | 7 | 5 | 2   | 16 |
| 980 | 6 | 2 | 6 | 7 | 4 | 3   | 36 |
| 980 | 1 | 2 | 2 | 7 | 3 | 1   | 2  |
| 980 | 7 | 5 | 6 | 5 | 7 | 4   | 42 |
| 980 | 4 | 1 | 3 | 2 | 4 | 2   | 12 |
| 980 | 6 | 2 | 1 | 6 | 6 | 6.5 | 6  |
| 980 | 4 | 4 | 4 | 7 | 5 | 2   | 16 |
| 980 | 6 | 4 | 4 | 4 | 4 | 6.5 | 24 |
| 980 | 1 | 7 | 4 | 2 | 4 | 1   | 4  |
| 980 | 7 | 5 | 1 | 2 | 3 | 5.5 | 7  |
| 980 | 4 | 2 | 6 | 2 | 3 | 2.5 | 24 |
| 980 | 6 | 2 | 3 | 6 | 6 | 7   | 18 |
| 980 | 4 | 6 | 6 | 5 | 5 | 2   | 24 |
| 980 | 6 | 7 | 1 | 4 | 4 | 2.5 | 6  |
| 980 | 1 | 3 | 6 | 4 | 5 | 1.5 | 6  |
| 980 | 4 | 3 | 4 | 2 | 5 | 2.5 | 16 |
| 980 | 4 | 1 | 4 | 2 | 3 | 2.5 | 16 |
| 981 | 6 | 7 | 4 | 6 | 6 | 6.5 | 24 |
| 981 | 5 | 7 | 3 | 6 | 7 | 5   | 15 |
| 981 | 6 | 7 | 7 | 4 | 3 | 4   | 42 |
| 981 | 5 | 7 | 6 | 6 | 4 | 4.5 | 30 |
| 981 | 6 | 7 | 5 | 7 | 4 | 3.5 | 30 |
| 981 | 4 | 5 | 3 | 5 | 4 | 2.5 | 12 |
| 981 | 6 | 7 | 6 | 6 | 6 | 5   | 36 |
| 981 | 5 | 7 | 5 | 5 | 3 | 4   | 25 |
| 981 | 6 | 4 | 4 | 7 | 2 | 4.5 | 24 |
| 981 | 5 | 7 | 4 | 6 | 4 | 6.5 | 20 |
| 981 | 6 | 7 | 5 | 7 | 5 | 7   | 30 |
| 981 | 4 | 7 | 6 | 3 | 7 | 2.5 | 24 |
| 981 | 6 | 7 | 3 | 5 | 3 | 5.5 | 18 |
| 981 | 5 | 7 | 5 | 4 | 5 | 6   | 25 |
| 981 | 6 | 4 | 7 | 7 | 5 | 7   | 42 |

brand extension data

|     |   |   |   |   |   |     |    |
|-----|---|---|---|---|---|-----|----|
| 981 | 5 | 6 | 3 | 6 | 4 | 6.5 | 15 |
| 981 | 6 | 7 | 5 | 6 | 3 | 6   | 30 |
| 981 | 4 | 5 | 3 | 1 | 6 | 5   | 12 |
| 981 | 5 | 7 | 6 | 6 | 6 | 6   | 30 |
| 981 | 5 | 7 | 2 | 2 | 5 | 6   | 10 |
| 982 | 6 | 3 | 1 | 5 | 4 | 6.5 | 6  |
| 982 | 7 | 5 | 2 | 7 | 6 | 4   | 14 |
| 982 | 5 | 4 | 2 | 2 | 2 | 4.5 | 10 |
| 982 | 5 | 5 | 3 | 6 | 6 | 6.5 | 15 |
| 982 | 5 | 7 | 7 | 7 | 3 | 7   | 35 |
| 982 | 2 | 5 | 4 | 4 | 3 | 1.5 | 8  |
| 982 | 6 | 3 | 1 | 4 | 4 | 3   | 6  |
| 982 | 7 | 5 | 4 | 7 | 6 | 6.5 | 28 |
| 982 | 5 | 1 | 2 | 1 | 2 | 2.5 | 10 |
| 982 | 5 | 5 | 3 | 6 | 6 | 5.5 | 15 |
| 982 | 5 | 7 | 6 | 7 | 4 | 6.5 | 30 |
| 982 | 2 | 1 | 1 | 1 | 5 | 3   | 2  |
| 982 | 6 | 3 | 2 | 3 | 2 | 3   | 12 |
| 982 | 7 | 6 | 2 | 7 | 7 | 6.5 | 14 |
| 982 | 5 | 5 | 6 | 6 | 2 | 3   | 30 |
| 982 | 5 | 2 | 3 | 2 | 6 | 5   | 15 |
| 982 | 5 | 5 | 2 | 5 | 3 | 5.5 | 10 |
| 982 | 2 | 3 | 2 | 1 | 4 | 3   | 4  |
| 982 | 7 | 7 | 6 | 7 | 7 | 7   | 42 |
| 982 | 5 | 3 | 1 | 3 | 7 | 6   | 5  |
| 983 | 5 | 4 | 6 | 5 | 3 | 5   | 30 |
| 983 | 7 | 7 | 1 | 3 | 6 | 1.5 | 7  |
| 983 | 6 | 1 | 6 | 4 | 2 | 3   | 36 |
| 983 | 3 | 7 | 3 | 6 | 6 | 2.5 | 9  |
| 983 | 5 | 2 | 7 | 7 | 4 | 4.5 | 35 |
| 983 | 3 | 6 | 6 | 7 | 1 | 1   | 18 |
| 983 | 5 | 2 | 7 | 2 | 5 | 4.5 | 35 |
| 983 | 7 | 7 | 3 | 1 | 3 | 4.5 | 21 |
| 983 | 6 | 1 | 2 | 2 | 2 | 2.5 | 12 |
| 983 | 3 | 5 | 1 | 3 | 2 | 1.5 | 3  |
| 983 | 5 | 5 | 3 | 3 | 3 | 1   | 15 |
| 983 | 3 | 7 | 1 | 2 | 6 | 1.5 | 3  |
| 983 | 5 | 7 | 1 | 1 | 2 | 1   | 5  |
| 983 | 7 | 7 | 2 | 2 | 4 | 5.5 | 14 |
| 983 | 6 | 5 | 7 | 4 | 3 | 6.5 | 42 |
| 983 | 3 | 7 | 5 | 5 | 7 | 3   | 15 |
| 983 | 5 | 7 | 2 | 5 | 3 | 3   | 10 |
| 983 | 3 | 3 | 1 | 1 | 3 | 2.5 | 3  |
| 983 | 7 | 6 | 5 | 1 | 6 | 6   | 35 |
| 983 | 3 | 6 | 1 | 1 | 4 | 2.5 | 3  |
| 984 | 5 | 7 | 7 | 7 | 4 | 3   | 35 |
| 984 | 4 | 5 | 1 | 1 | 7 | 1.5 | 4  |
| 984 | 5 | 3 | 4 | 5 | 1 | 1   | 20 |
| 984 | 7 | 6 | 5 | 6 | 3 | 1   | 35 |
| 984 | 5 | 7 | 5 | 7 | 2 | 3.5 | 25 |
| 984 | 4 | 1 | 1 | 1 | 2 | 1   | 4  |

brand extension data

|     |   |   |   |   |   |     |    |
|-----|---|---|---|---|---|-----|----|
| 984 | 5 | 5 | 4 | 6 | 6 | 4   | 20 |
| 984 | 4 | 6 | 1 | 1 | 4 | 2.5 | 4  |
| 984 | 5 | 1 | 2 | 5 | 2 | 3   | 10 |
| 984 | 7 | 2 | 2 | 3 | 3 | 1   | 14 |
| 984 | 5 | 2 | 1 | 2 | 1 | 4   | 5  |
| 984 | 4 | 7 | 4 | 1 | 7 | 5.5 | 16 |
| 984 | 5 | 5 | 1 | 1 | 1 | 2   | 5  |
| 984 | 4 | 7 | 1 | 5 | 3 | 4.5 | 4  |
| 984 | 5 | 5 | 6 | 6 | 3 | 5   | 30 |
| 984 | 7 | 7 | 1 | 4 | 3 | 2.5 | 7  |
| 984 | 5 | 6 | 1 | 5 | 3 | 2   | 5  |
| 984 | 4 | 1 | 1 | 1 | 7 | 1   | 4  |
| 984 | 4 | 7 | 5 | 4 | 7 | 4   | 20 |
| 984 | 7 | 3 | 1 | 2 | 3 | 2   | 7  |
| 985 | 7 | 4 | 7 | 7 | 6 | 5.5 | 49 |
| 985 | 7 | 6 | 2 | 5 | 6 | 6   | 14 |
| 985 | 7 | 3 | 5 | 3 | 2 | 3.5 | 35 |
| 985 | 5 | 5 | 2 | 6 | 3 | 3.5 | 10 |
| 985 | 7 | 7 | 4 | 6 | 2 | 4   | 28 |
| 985 | 1 | 4 | 2 | 4 | 1 | 2   | 2  |
| 985 | 7 | 6 | 5 | 5 | 7 | 4.5 | 35 |
| 985 | 7 | 5 | 2 | 4 | 4 | 3   | 14 |
| 985 | 7 | 3 | 4 | 3 | 2 | 4   | 28 |
| 985 | 5 | 5 | 3 | 6 | 3 | 4   | 15 |
| 985 | 7 | 6 | 6 | 6 | 2 | 4.5 | 42 |
| 985 | 1 | 2 | 2 | 2 | 3 | 2.5 | 2  |
| 985 | 7 | 7 | 2 | 3 | 2 | 3   | 14 |
| 985 | 7 | 6 | 4 | 3 | 4 | 5   | 28 |
| 985 | 7 | 4 | 6 | 6 | 3 | 6   | 42 |
| 985 | 5 | 6 | 1 | 3 | 3 | 3   | 5  |
| 985 | 7 | 6 | 2 | 4 | 3 | 3   | 14 |
| 985 | 1 | 5 | 5 | 7 | 4 | 5   | 5  |
| 985 | 7 | 6 | 5 | 6 | 7 | 4   | 35 |
| 985 | 5 | 3 | 1 | 3 | 4 | 2.5 | 5  |
| 986 | 5 | 6 | 6 | 7 | 6 | 7   | 30 |
| 986 | 7 | 7 | 2 | 1 | 7 | 2.5 | 14 |
| 986 | 6 | 3 | 3 | 3 | 1 | 1   | 18 |
| 986 | 6 | 5 | 4 | 4 | 4 | 2.5 | 24 |
| 986 | 6 | 5 | 5 | 7 | 3 | 5.5 | 30 |
| 986 | 2 | 6 | 2 | 5 | 1 | 3   | 4  |
| 986 | 5 | 5 | 7 | 4 | 6 | 4   | 35 |
| 986 | 7 | 7 | 5 | 2 | 4 | 4   | 35 |
| 986 | 6 | 1 | 2 | 5 | 2 | 2   | 12 |
| 986 | 6 | 2 | 4 | 4 | 3 | 4   | 24 |
| 986 | 6 | 4 | 3 | 6 | 2 | 6   | 18 |
| 986 | 2 | 6 | 1 | 5 | 7 | 5.5 | 2  |
| 986 | 5 | 4 | 2 | 1 | 1 | 1   | 10 |
| 986 | 7 | 7 | 3 | 5 | 7 | 6   | 21 |
| 986 | 6 | 4 | 4 | 5 | 4 | 5.5 | 24 |
| 986 | 6 | 2 | 4 | 4 | 3 | 3   | 24 |
| 986 | 6 | 7 | 3 | 2 | 1 | 2.5 | 18 |

brand extension data

|     |   |   |   |   |   |     |    |
|-----|---|---|---|---|---|-----|----|
| 986 | 2 | 1 | 1 | 3 | 7 | 1.5 | 2  |
| 986 | 7 | 5 | 5 | 3 | 2 | 4   | 35 |
| 986 | 6 | 2 | 2 | 2 | 7 | 3   | 12 |
| 987 | 7 | 1 | 7 | 6 | 2 | 3.5 | 49 |
| 987 | 6 | 3 | 1 | 3 | 6 | 3   | 6  |
| 987 | 6 | 6 | 3 | 3 | 2 | 1.5 | 18 |
| 987 | 5 | 5 | 1 | 4 | 2 | 4.5 | 5  |
| 987 | 5 | 7 | 6 | 5 | 3 | 6   | 30 |
| 987 | 3 | 1 | 3 | 4 | 1 | 1.5 | 9  |
| 987 | 7 | 1 | 4 | 6 | 2 | 3   | 28 |
| 987 | 6 | 5 | 2 | 6 | 3 | 5   | 12 |
| 987 | 6 | 2 | 1 | 1 | 2 | 1   | 6  |
| 987 | 5 | 5 | 1 | 2 | 2 | 4.5 | 5  |
| 987 | 5 | 5 | 4 | 2 | 2 | 1   | 20 |
| 987 | 3 | 1 | 1 | 1 | 2 | 1   | 3  |
| 987 | 7 | 1 | 1 | 1 | 2 | 1   | 7  |
| 987 | 6 | 5 | 4 | 5 | 4 | 6   | 24 |
| 987 | 6 | 7 | 5 | 6 | 2 | 5.5 | 30 |
| 987 | 5 | 3 | 1 | 3 | 3 | 4.5 | 5  |
| 987 | 5 | 2 | 2 | 1 | 2 | 2.5 | 10 |
| 987 | 3 | 1 | 1 | 1 | 1 | 1   | 3  |
| 987 | 6 | 5 | 3 | 3 | 6 | 5.5 | 18 |
| 987 | 5 | 1 | 1 | 2 | 4 | 5   | 5  |
| 988 | 5 | 6 | 5 | 7 | 5 | 5.5 | 25 |
| 988 | 5 | 6 | 2 | 1 | 5 | 3.5 | 10 |
| 988 | 5 | 6 | 3 | 3 | 1 | 1.5 | 15 |
| 988 | 3 | 5 | 3 | 5 | 5 | 4   | 9  |
| 988 | 4 | 5 | 5 | 5 | 5 | 4   | 20 |
| 988 | 4 | 2 | 4 | 7 | 2 | 6   | 16 |
| 988 | 5 | 6 | 5 | 5 | 5 | 4   | 25 |
| 988 | 5 | 6 | 2 | 2 | 4 | 4.5 | 10 |
| 988 | 5 | 2 | 4 | 6 | 4 | 4   | 20 |
| 988 | 3 | 5 | 2 | 5 | 5 | 3.5 | 6  |
| 988 | 4 | 3 | 7 | 3 | 6 | 3.5 | 28 |
| 988 | 4 | 4 | 2 | 2 | 7 | 3   | 8  |
| 988 | 5 | 6 | 4 | 3 | 1 | 1   | 20 |
| 988 | 5 | 6 | 2 | 2 | 5 | 5   | 10 |
| 988 | 5 | 5 | 5 | 5 | 5 | 5.5 | 25 |
| 988 | 3 | 5 | 3 | 5 | 7 | 4   | 9  |
| 988 | 4 | 5 | 2 | 4 | 4 | 3   | 8  |
| 988 | 4 | 2 | 1 | 2 | 4 | 2   | 4  |
| 988 | 5 | 6 | 2 | 2 | 5 | 2.5 | 10 |
| 988 | 3 | 4 | 1 | 2 | 5 | 2   | 3  |
| 989 | 6 | 6 | 7 | 7 | 6 | 6   | 42 |
| 989 | 6 | 7 | 1 | 1 | 7 | 2   | 6  |
| 989 | 7 | 2 | 6 | 2 | 2 | 4.5 | 42 |
| 989 | 2 | 1 | 1 | 5 | 5 | 2.5 | 2  |
| 989 | 5 | 7 | 3 | 6 | 1 | 5.5 | 15 |
| 989 | 1 | 7 | 4 | 7 | 5 | 5   | 4  |
| 989 | 6 | 5 | 5 | 4 | 7 | 3.5 | 30 |
| 989 | 6 | 3 | 1 | 1 | 1 | 2.5 | 6  |

brand extension data

|     |   |   |   |   |   |     |    |
|-----|---|---|---|---|---|-----|----|
| 989 | 7 | 1 | 3 | 3 | 5 | 5.5 | 21 |
| 989 | 2 | 5 | 1 | 3 | 2 | 2   | 2  |
| 989 | 5 | 1 | 2 | 5 | 1 | 4.5 | 10 |
| 989 | 1 | 7 | 1 | 2 | 7 | 6.5 | 1  |
| 989 | 6 | 6 | 1 | 1 | 2 | 2.5 | 6  |
| 989 | 6 | 5 | 1 | 5 | 3 | 3.5 | 6  |
| 989 | 7 | 6 | 7 | 4 | 4 | 7   | 49 |
| 989 | 2 | 4 | 1 | 6 | 6 | 5.5 | 2  |
| 989 | 5 | 2 | 1 | 4 | 4 | 4   | 5  |
| 989 | 1 | 1 | 1 | 1 | 3 | 4   | 1  |
| 989 | 6 | 6 | 1 | 5 | 6 | 5   | 6  |
| 989 | 2 | 1 | 1 | 1 | 3 | 3.5 | 2  |
| 990 | 6 | 5 | 5 | 7 | 4 | 5.5 | 30 |
| 990 | 6 | 6 | 1 | 3 | 5 | 3   | 6  |
| 990 | 6 | 2 | 3 | 4 | 1 | 4   | 18 |
| 990 | 5 | 4 | 3 | 5 | 3 | 4   | 15 |
| 990 | 5 | 2 | 6 | 6 | 3 | 2.5 | 30 |
| 990 | 3 | 2 | 5 | 6 | 2 | 1.5 | 15 |
| 990 | 6 | 4 | 5 | 4 | 5 | 3.5 | 30 |
| 990 | 6 | 3 | 2 | 4 | 4 | 5   | 12 |
| 990 | 6 | 1 | 3 | 4 | 2 | 4   | 18 |
| 990 | 5 | 4 | 3 | 4 | 3 | 3.5 | 15 |
| 990 | 5 | 2 | 6 | 5 | 2 | 4.5 | 30 |
| 990 | 3 | 3 | 1 | 2 | 4 | 4   | 3  |
| 990 | 6 | 6 | 3 | 3 | 1 | 2.5 | 18 |
| 990 | 6 | 4 | 2 | 3 | 4 | 5   | 12 |
| 990 | 6 | 5 | 5 | 6 | 2 | 6.5 | 30 |
| 990 | 5 | 5 | 2 | 5 | 3 | 3.5 | 10 |
| 990 | 5 | 6 | 2 | 4 | 3 | 2   | 10 |
| 990 | 3 | 3 | 1 | 1 | 4 | 1.5 | 3  |
| 990 | 6 | 4 | 2 | 2 | 4 | 4.5 | 12 |
| 990 | 5 | 4 | 2 | 2 | 4 | 2.5 | 10 |
| 991 | 5 | 7 | 6 | 1 | 6 | 2   | 30 |
| 991 | 6 | 1 | 1 | 2 | 1 | 1.5 | 6  |
| 991 | 6 | 7 | 7 | 6 | 5 | 3.5 | 42 |
| 991 | 2 | 7 | 7 | 6 | 6 | 2   | 14 |
| 991 | 3 | 7 | 5 | 5 | 2 | 1.5 | 15 |
| 991 | 6 | 2 | 4 | 7 | 1 | 2   | 24 |
| 991 | 5 | 3 | 3 | 1 | 2 | 1.5 | 15 |
| 991 | 6 | 1 | 3 | 6 | 1 | 4   | 18 |
| 991 | 6 | 6 | 3 | 6 | 6 | 4   | 18 |
| 991 | 2 | 5 | 6 | 3 | 2 | 2   | 12 |
| 991 | 3 | 5 | 1 | 2 | 1 | 6.5 | 3  |
| 991 | 6 | 7 | 2 | 1 | 1 | 2   | 12 |
| 991 | 5 | 7 | 7 | 5 | 3 | 4.5 | 35 |
| 991 | 6 | 5 | 6 | 4 | 2 | 5   | 36 |
| 991 | 6 | 7 | 4 | 5 | 7 | 7   | 24 |
| 991 | 2 | 6 | 2 | 6 | 2 | 4   | 4  |
| 991 | 3 | 1 | 1 | 1 | 6 | 1   | 3  |
| 991 | 5 | 3 | 4 | 4 | 7 | 3.5 | 20 |
| 991 | 6 | 6 | 1 | 7 | 3 | 7   | 6  |

brand extension data

|     |   |   |   |   |   |     |    |
|-----|---|---|---|---|---|-----|----|
| 992 | 6 | 7 | 4 | 7 | 7 | 2   | 24 |
| 992 | 7 | 5 | 2 | 1 | 7 | 4.5 | 14 |
| 992 | 7 | 3 | 5 | 1 | 2 | 2.5 | 35 |
| 992 | 7 | 1 | 1 | 4 | 7 | 4.5 | 7  |
| 992 | 7 | 7 | 1 | 7 | 3 | 3   | 7  |
| 992 | 7 | 2 | 5 | 7 | 3 | 4.5 | 35 |
| 992 | 6 | 7 | 7 | 4 | 7 | 3   | 42 |
| 992 | 7 | 5 | 4 | 1 | 5 | 5.5 | 28 |
| 992 | 7 | 2 | 1 | 4 | 4 | 5.5 | 7  |
| 992 | 7 | 7 | 1 | 4 | 7 | 4.5 | 7  |
| 992 | 7 | 2 | 1 | 5 | 7 | 1   | 7  |
| 992 | 7 | 7 | 1 | 1 | 7 | 5   | 7  |
| 992 | 6 | 7 | 4 | 1 | 2 | 1   | 24 |
| 992 | 7 | 7 | 1 | 1 | 4 | 6   | 7  |
| 992 | 7 | 6 | 6 | 4 | 5 | 6   | 42 |
| 992 | 7 | 7 | 1 | 5 | 7 | 5   | 7  |
| 992 | 7 | 7 | 1 | 4 | 5 | 1   | 7  |
| 992 | 7 | 1 | 1 | 1 | 7 | 2.5 | 7  |
| 992 | 7 | 7 | 1 | 1 | 7 | 3.5 | 7  |
| 992 | 7 | 2 | 1 | 1 | 4 | 5   | 7  |
| 993 | 5 | 1 | 6 | 7 | 1 | 2   | 30 |
| 993 | 5 | 6 | 2 | 6 | 5 | 3.5 | 10 |
| 993 | 6 | 6 | 1 | 2 | 1 | 2   | 6  |
| 993 | 4 | 7 | 2 | 6 | 3 | 5   | 8  |
| 993 | 7 | 4 | 5 | 7 | 1 | 6   | 35 |
| 993 | 6 | 6 | 6 | 7 | 1 | 2.5 | 36 |
| 993 | 5 | 1 | 2 | 7 | 1 | 2   | 10 |
| 993 | 5 | 6 | 3 | 6 | 2 | 2   | 15 |
| 993 | 6 | 6 | 1 | 1 | 1 | 2   | 6  |
| 993 | 4 | 6 | 2 | 6 | 3 | 5.5 | 8  |
| 993 | 7 | 4 | 5 | 7 | 1 | 4.5 | 35 |
| 993 | 6 | 3 | 1 | 6 | 6 | 3   | 6  |
| 993 | 5 | 5 | 2 | 2 | 1 | 1.5 | 10 |
| 993 | 5 | 6 | 3 | 6 | 1 | 5   | 15 |
| 993 | 6 | 4 | 4 | 7 | 2 | 5   | 24 |
| 993 | 4 | 6 | 3 | 6 | 3 | 3   | 12 |
| 993 | 7 | 6 | 1 | 5 | 1 | 2   | 7  |
| 993 | 6 | 7 | 1 | 2 | 5 | 1   | 6  |
| 993 | 5 | 6 | 3 | 6 | 1 | 4   | 15 |
| 993 | 4 | 6 | 1 | 6 | 1 | 2.5 | 4  |
| 994 | 4 | 7 | 7 | 7 | 4 | 3.5 | 28 |
| 994 | 5 | 7 | 2 | 1 | 4 | 3   | 10 |
| 994 | 3 | 2 | 6 | 2 | 1 | 2   | 18 |
| 994 | 3 | 4 | 2 | 3 | 3 | 3   | 6  |
| 994 | 3 | 7 | 4 | 5 | 3 | 4   | 12 |
| 994 | 3 | 1 | 4 | 4 | 1 | 2   | 12 |
| 994 | 4 | 7 | 7 | 3 | 5 | 2   | 28 |
| 994 | 5 | 3 | 2 | 1 | 2 | 2   | 10 |
| 994 | 3 | 2 | 6 | 2 | 4 | 2   | 18 |
| 994 | 3 | 3 | 2 | 2 | 3 | 2   | 6  |
| 994 | 3 | 4 | 4 | 3 | 2 | 4.5 | 12 |

brand extension data

|     |   |   |   |   |   |     |    |
|-----|---|---|---|---|---|-----|----|
| 994 | 3 | 3 | 3 | 3 | 7 | 5   | 9  |
| 994 | 4 | 7 | 2 | 3 | 1 | 2   | 8  |
| 994 | 5 | 6 | 2 | 1 | 4 | 4   | 10 |
| 994 | 3 | 2 | 6 | 2 | 5 | 2   | 18 |
| 994 | 3 | 5 | 2 | 2 | 4 | 2   | 6  |
| 994 | 3 | 6 | 2 | 3 | 2 | 2   | 6  |
| 994 | 3 | 1 | 2 | 2 | 3 | 1   | 6  |
| 994 | 5 | 3 | 2 | 2 | 4 | 2.5 | 10 |
| 994 | 3 | 5 | 2 | 2 | 4 | 1.5 | 6  |
| 995 | 6 | 6 | 6 | 7 | 6 | 4   | 36 |
| 995 | 6 | 6 | 1 | 1 | 6 | 5.5 | 6  |
| 995 | 6 | 2 | 5 | 1 | 1 | 4   | 30 |
| 995 | 6 | 5 | 1 | 2 | 4 | 3   | 6  |
| 995 | 6 | 6 | 3 | 2 | 5 | 4.5 | 18 |
| 995 | 4 | 1 | 7 | 6 | 2 | 4.5 | 28 |
| 995 | 6 | 6 | 5 | 4 | 6 | 5   | 30 |
| 995 | 6 | 4 | 1 | 1 | 5 | 5   | 6  |
| 995 | 6 | 2 | 3 | 2 | 5 | 5.5 | 18 |
| 995 | 6 | 5 | 1 | 2 | 4 | 4.5 | 6  |
| 995 | 6 | 4 | 3 | 1 | 3 | 5   | 18 |
| 995 | 4 | 6 | 1 | 1 | 4 | 4   | 4  |
| 995 | 6 | 6 | 1 | 1 | 1 | 4   | 6  |
| 995 | 6 | 6 | 1 | 1 | 6 | 5.5 | 6  |
| 995 | 6 | 2 | 6 | 1 | 5 | 5.5 | 36 |
| 995 | 6 | 1 | 1 | 2 | 5 | 3   | 6  |
| 995 | 6 | 1 | 1 | 2 | 3 | 3   | 6  |
| 995 | 4 | 1 | 1 | 1 | 3 | 5   | 4  |
| 995 | 6 | 4 | 1 | 1 | 7 | 5.5 | 6  |
| 995 | 6 | 1 | 1 | 1 | 6 | 4   | 6  |
| 996 | 7 | 7 | 4 | 7 | 5 | 6   | 28 |
| 996 | 7 | 7 | 1 | 3 | 6 | 5.5 | 7  |
| 996 | 4 | 2 | 4 | 1 | 3 | 2   | 16 |
| 996 | 4 | 1 | 1 | 5 | 3 | 4   | 4  |
| 996 | 6 | 7 | 3 | 7 | 5 | 5.5 | 18 |
| 996 | 4 | 1 | 3 | 7 | 1 | 5.5 | 12 |
| 996 | 7 | 7 | 7 | 5 | 6 | 2   | 49 |
| 996 | 7 | 4 | 1 | 5 | 3 | 5.5 | 7  |
| 996 | 4 | 1 | 1 | 1 | 3 | 1.5 | 4  |
| 996 | 4 | 1 | 1 | 4 | 3 | 2.5 | 4  |
| 996 | 6 | 6 | 6 | 5 | 3 | 1   | 36 |
| 996 | 4 | 3 | 1 | 1 | 7 | 1   | 4  |
| 996 | 7 | 7 | 1 | 1 | 3 | 1   | 7  |
| 996 | 7 | 7 | 1 | 5 | 5 | 6.5 | 7  |
| 996 | 4 | 2 | 5 | 2 | 2 | 2   | 20 |
| 996 | 4 | 1 | 1 | 3 | 5 | 1.5 | 4  |
| 996 | 6 | 6 | 1 | 3 | 2 | 4.5 | 6  |
| 996 | 4 | 1 | 1 | 1 | 6 | 3.5 | 4  |
| 996 | 7 | 4 | 1 | 3 | 5 | 3   | 7  |
| 996 | 4 | 3 | 1 | 2 | 5 | 1   | 4  |
| 997 | 2 | 2 | 2 | 7 | 3 | 1   | 4  |
| 997 | 4 | 1 | 5 | 2 | 1 | 2.5 | 20 |

brand extension data

|      |   |   |   |   |   |     |    |
|------|---|---|---|---|---|-----|----|
| 997  | 6 | 6 | 2 | 6 | 2 | 6.5 | 12 |
| 997  | 1 | 2 | 3 | 7 | 1 | 3.5 | 3  |
| 997  | 2 | 5 | 5 | 5 | 3 | 1   | 10 |
| 997  | 5 | 6 | 4 | 4 | 2 | 3.5 | 20 |
| 997  | 4 | 2 | 2 | 5 | 3 | 1.5 | 8  |
| 997  | 6 | 2 | 4 | 3 | 4 | 1.5 | 24 |
| 997  | 1 | 4 | 1 | 4 | 6 | 4.5 | 1  |
| 997  | 2 | 4 | 2 | 2 | 1 | 1   | 4  |
| 997  | 5 | 6 | 3 | 3 | 5 | 5   | 15 |
| 997  | 4 | 1 | 7 | 3 | 2 | 1.5 | 28 |
| 997  | 6 | 1 | 4 | 2 | 2 | 2   | 24 |
| 997  | 1 | 1 | 1 | 1 | 3 | 2.5 | 1  |
| 997  | 5 | 5 | 5 | 1 | 6 | 3.5 | 25 |
| 998  | 7 | 6 | 3 | 6 | 5 | 7   | 21 |
| 998  | 4 | 5 | 1 | 6 | 5 | 3   | 4  |
| 998  | 7 | 5 | 1 | 3 | 1 | 2.5 | 7  |
| 998  | 5 | 4 | 1 | 5 | 4 | 3.5 | 5  |
| 998  | 6 | 7 | 5 | 7 | 5 | 6   | 30 |
| 998  | 4 | 4 | 1 | 7 | 2 | 2   | 4  |
| 998  | 7 | 7 | 1 | 5 | 7 | 4.5 | 7  |
| 998  | 4 | 2 | 1 | 3 | 4 | 2.5 | 4  |
| 998  | 7 | 3 | 2 | 6 | 4 | 5.5 | 14 |
| 998  | 5 | 4 | 1 | 5 | 5 | 5.5 | 5  |
| 998  | 6 | 6 | 5 | 6 | 3 | 2.5 | 30 |
| 998  | 4 | 3 | 1 | 4 | 2 | 2   | 4  |
| 998  | 7 | 6 | 1 | 2 | 1 | 1.5 | 7  |
| 998  | 4 | 5 | 3 | 5 | 3 | 5   | 12 |
| 998  | 7 | 3 | 4 | 5 | 4 | 4   | 28 |
| 998  | 5 | 3 | 1 | 1 | 6 | 1   | 5  |
| 998  | 6 | 5 | 1 | 6 | 3 | 2.5 | 6  |
| 998  | 4 | 2 | 1 | 1 | 1 | 1   | 4  |
| 998  | 4 | 2 | 1 | 3 | 3 | 3.5 | 4  |
| 998  | 5 | 3 | 1 | 1 | 3 | 2   | 5  |
| 999  | 5 | 7 | 1 | 1 | 6 | 5.5 | 5  |
| 999  | 6 | 7 | 4 | 5 | 2 | 5.5 | 24 |
| 999  | 4 | 7 | 1 | 6 | 4 | 6.5 | 4  |
| 999  | 4 | 6 | 1 | 7 | 3 | 2.5 | 4  |
| 999  | 2 | 7 | 7 | 7 | 2 | 3   | 14 |
| 999  | 5 | 2 | 1 | 3 | 5 | 2   | 5  |
| 999  | 6 | 4 | 2 | 5 | 2 | 2.5 | 12 |
| 999  | 4 | 1 | 1 | 5 | 4 | 7   | 4  |
| 999  | 4 | 4 | 4 | 5 | 2 | 1   | 16 |
| 999  | 2 | 1 | 1 | 1 | 7 | 2.5 | 2  |
| 999  | 5 | 4 | 3 | 3 | 6 | 4   | 15 |
| 999  | 6 | 7 | 6 | 5 | 2 | 6.5 | 36 |
| 999  | 4 | 5 | 1 | 3 | 7 | 4.5 | 4  |
| 999  | 4 | 1 | 1 | 4 | 3 | 1   | 4  |
| 999  | 2 | 3 | 3 | 1 | 5 | 2.5 | 6  |
| 999  | 5 | 2 | 4 | 3 | 5 | 2.5 | 20 |
| 999  | 4 | 1 | 1 | 1 | 6 | 4   | 4  |
| 1000 | 6 | 6 | 7 | 6 | 1 | 6   | 42 |

brand extension data

|      |   |   |   |   |   |     |    |
|------|---|---|---|---|---|-----|----|
| 1000 | 6 | 7 | 3 | 2 | 7 | 5.5 | 18 |
| 1000 | 6 | 3 | 2 | 2 | 1 | 4   | 12 |
| 1000 | 5 | 4 | 3 | 4 | 1 | 2.5 | 15 |
| 1000 | 6 | 6 | 6 | 5 | 1 | 4.5 | 36 |
| 1000 | 1 | 6 | 6 | 7 | 1 | 1   | 6  |
| 1000 | 6 | 6 | 4 | 3 | 1 | 4.5 | 24 |
| 1000 | 6 | 4 | 4 | 2 | 1 | 3.5 | 24 |
| 1000 | 6 | 3 | 3 | 5 | 1 | 5   | 18 |
| 1000 | 5 | 4 | 3 | 4 | 1 | 3.5 | 15 |
| 1000 | 6 | 3 | 5 | 5 | 1 | 3.5 | 30 |
| 1000 | 1 | 4 | 2 | 2 | 4 | 1   | 2  |
| 1000 | 6 | 6 | 3 | 2 | 1 | 3   | 18 |
| 1000 | 6 | 6 | 5 | 2 | 1 | 5   | 30 |
| 1000 | 6 | 6 | 5 | 6 | 1 | 6.5 | 30 |
| 1000 | 5 | 2 | 2 | 3 | 1 | 2.5 | 10 |
| 1000 | 6 | 6 | 3 | 3 | 1 | 3   | 18 |
| 1000 | 1 | 1 | 1 | 1 | 4 | 1   | 1  |
| 1000 | 6 | 3 | 2 | 2 | 1 | 2.5 | 12 |
| 1000 | 5 | 2 | 2 | 2 | 1 | 4.5 | 10 |
| 1001 | 7 | 7 | 6 | 7 | 7 | 6.5 | 42 |
| 1001 | 7 | 7 | 1 | 1 | 7 | 1   | 7  |
| 1001 | 7 | 1 | 1 | 1 | 6 | 1   | 7  |
| 1001 | 4 | 7 | 3 | 2 | 7 | 1.5 | 12 |
| 1001 | 7 | 4 | 7 | 7 | 3 | 7   | 49 |
| 1001 | 7 | 1 | 2 | 5 | 1 | 2.5 | 14 |
| 1001 | 7 | 3 | 1 | 3 | 7 | 1   | 7  |
| 1001 | 7 | 2 | 1 | 1 | 4 | 2.5 | 7  |
| 1001 | 7 | 1 | 1 | 1 | 1 | 1.5 | 7  |
| 1001 | 4 | 1 | 1 | 3 | 5 | 5   | 4  |
| 1001 | 7 | 1 | 2 | 5 | 1 | 3   | 14 |
| 1001 | 7 | 1 | 1 | 5 | 2 | 2   | 7  |
| 1001 | 7 | 6 | 1 | 1 | 6 | 1   | 7  |
| 1001 | 7 | 5 | 1 | 2 | 4 | 5   | 7  |
| 1001 | 7 | 1 | 5 | 6 | 2 | 6.5 | 35 |
| 1001 | 4 | 1 | 1 | 1 | 7 | 3.5 | 4  |
| 1001 | 7 | 1 | 1 | 2 | 1 | 1.5 | 7  |
| 1001 | 7 | 1 | 1 | 1 | 6 | 1   | 7  |
| 1001 | 7 | 4 | 1 | 2 | 7 | 2   | 7  |
| 1001 | 4 | 1 | 1 | 1 | 4 | 1   | 4  |
| 1002 | 5 | 5 | 7 | 7 | 5 | 4.5 | 35 |
| 1002 | 7 | 7 | 1 | 5 | 7 | 5   | 7  |
| 1002 | 6 | 3 | 7 | 4 | 1 | 3   | 42 |
| 1002 | 5 | 6 | 5 | 7 | 5 | 5   | 25 |
| 1002 | 6 | 7 | 6 | 7 | 5 | 7   | 36 |
| 1002 | 4 | 1 | 5 | 7 | 2 | 4.5 | 20 |
| 1002 | 5 | 6 | 5 | 5 | 5 | 2.5 | 25 |
| 1002 | 7 | 7 | 5 | 2 | 5 | 2.5 | 35 |
| 1002 | 6 | 2 | 6 | 6 | 3 | 6   | 36 |
| 1002 | 5 | 6 | 5 | 7 | 5 | 6   | 25 |
| 1002 | 6 | 6 | 6 | 5 | 5 | 6   | 36 |
| 1002 | 4 | 5 | 1 | 4 | 7 | 7   | 4  |

brand extension data

|      |   |   |   |   |   |     |    |
|------|---|---|---|---|---|-----|----|
| 1002 | 5 | 7 | 1 | 5 | 1 | 2   | 5  |
| 1002 | 7 | 7 | 5 | 2 | 4 | 6   | 35 |
| 1002 | 6 | 2 | 7 | 6 | 4 | 5.5 | 42 |
| 1002 | 5 | 6 | 5 | 7 | 5 | 5   | 25 |
| 1002 | 6 | 4 | 2 | 5 | 5 | 3.5 | 12 |
| 1002 | 4 | 1 | 1 | 1 | 7 | 1.5 | 4  |
| 1002 | 7 | 5 | 4 | 2 | 5 | 3.5 | 28 |
| 1002 | 5 | 6 | 2 | 2 | 4 | 5.5 | 10 |
| 1003 | 4 | 1 | 1 | 7 | 1 | 2   | 4  |
| 1003 | 6 | 6 | 1 | 1 | 4 | 3.5 | 6  |
| 1003 | 7 | 1 | 5 | 1 | 1 | 5.5 | 35 |
| 1003 | 4 | 7 | 3 | 5 | 1 | 4   | 12 |
| 1003 | 7 | 7 | 4 | 7 | 1 | 5   | 28 |
| 1003 | 6 | 1 | 1 | 7 | 2 | 7   | 6  |
| 1003 | 4 | 1 | 1 | 5 | 1 | 1.5 | 4  |
| 1003 | 6 | 2 | 1 | 1 | 1 | 2.5 | 6  |
| 1003 | 7 | 1 | 3 | 7 | 1 | 3.5 | 21 |
| 1003 | 4 | 2 | 1 | 4 | 1 | 3.5 | 4  |
| 1003 | 7 | 7 | 3 | 7 | 1 | 3   | 21 |
| 1003 | 6 | 7 | 1 | 1 | 7 | 7   | 6  |
| 1003 | 4 | 2 | 1 | 1 | 1 | 1   | 4  |
| 1003 | 6 | 6 | 1 | 1 | 2 | 6.5 | 6  |
| 1003 | 7 | 5 | 6 | 2 | 1 | 6   | 42 |
| 1003 | 4 | 4 | 1 | 1 | 1 | 1.5 | 4  |
| 1003 | 7 | 6 | 1 | 3 | 1 | 6   | 7  |
| 1003 | 6 | 1 | 1 | 2 | 6 | 1.5 | 6  |
| 1003 | 6 | 4 | 2 | 1 | 4 | 1.5 | 12 |
| 1003 | 4 | 1 | 1 | 1 | 2 | 4.5 | 4  |
| 1004 | 6 | 6 | 7 | 7 | 6 | 6   | 42 |
| 1004 | 7 | 6 | 2 | 4 | 7 | 2.5 | 14 |
| 1004 | 6 | 2 | 6 | 3 | 1 | 3   | 36 |
| 1004 | 4 | 6 | 1 | 6 | 5 | 5.5 | 4  |
| 1004 | 6 | 6 | 7 | 6 | 5 | 5   | 42 |
| 1004 | 3 | 2 | 3 | 6 | 2 | 6.5 | 9  |
| 1004 | 6 | 7 | 7 | 2 | 7 | 2   | 42 |
| 1004 | 7 | 7 | 5 | 5 | 4 | 4.5 | 35 |
| 1004 | 6 | 2 | 4 | 5 | 2 | 5   | 24 |
| 1004 | 4 | 6 | 2 | 5 | 4 | 3   | 8  |
| 1004 | 6 | 5 | 6 | 4 | 3 | 4.5 | 36 |
| 1004 | 3 | 6 | 1 | 2 | 6 | 1   | 3  |
| 1004 | 6 | 7 | 3 | 1 | 1 | 4.5 | 18 |
| 1004 | 7 | 5 | 5 | 6 | 5 | 6   | 35 |
| 1004 | 6 | 3 | 7 | 7 | 3 | 7   | 42 |
| 1004 | 4 | 1 | 3 | 2 | 6 | 4   | 12 |
| 1004 | 6 | 6 | 1 | 2 | 3 | 4.5 | 6  |
| 1004 | 3 | 1 | 1 | 1 | 7 | 1   | 3  |
| 1004 | 7 | 6 | 4 | 4 | 7 | 3   | 28 |
| 1004 | 4 | 1 | 1 | 1 | 5 | 1.5 | 4  |
| 1005 | 7 | 5 | 3 | 7 | 3 | 4   | 21 |
| 1005 | 5 | 5 | 1 | 2 | 5 | 4   | 5  |
| 1005 | 6 | 3 | 3 | 4 | 1 | 2.5 | 18 |

brand extension data

|      |   |   |   |   |   |     |    |
|------|---|---|---|---|---|-----|----|
| 1005 | 4 | 5 | 2 | 6 | 4 | 5   | 8  |
| 1005 | 3 | 5 | 5 | 5 | 2 | 3.5 | 15 |
| 1005 | 4 | 1 | 6 | 6 | 1 | 3.5 | 24 |
| 1005 | 7 | 5 | 1 | 6 | 5 | 2.5 | 7  |
| 1005 | 5 | 6 | 3 | 2 | 2 | 2   | 15 |
| 1005 | 6 | 2 | 4 | 6 | 2 | 2   | 24 |
| 1005 | 4 | 2 | 2 | 6 | 3 | 5   | 8  |
| 1005 | 3 | 2 | 3 | 3 | 2 | 2.5 | 9  |
| 1005 | 4 | 5 | 4 | 1 | 7 | 2.5 | 16 |
| 1005 | 7 | 5 | 1 | 3 | 1 | 3   | 7  |
| 1005 | 5 | 6 | 4 | 2 | 3 | 5   | 20 |
| 1005 | 6 | 2 | 5 | 4 | 2 | 2   | 30 |
| 1005 | 4 | 4 | 2 | 5 | 4 | 2.5 | 8  |
| 1005 | 3 | 4 | 3 | 5 | 2 | 3   | 9  |
| 1005 | 4 | 2 | 2 | 1 | 4 | 1.5 | 8  |
| 1005 | 5 | 5 | 3 | 3 | 5 | 3   | 15 |
| 1005 | 4 | 3 | 2 | 2 | 3 | 4.5 | 8  |
| 1006 | 4 | 3 | 5 | 6 | 5 | 2.5 | 20 |
| 1006 | 5 | 5 | 1 | 3 | 7 | 3   | 5  |
| 1006 | 5 | 4 | 4 | 2 | 1 | 1.5 | 20 |
| 1006 | 3 | 6 | 4 | 6 | 5 | 3   | 12 |
| 1006 | 6 | 6 | 6 | 7 | 5 | 5.5 | 36 |
| 1006 | 2 | 2 | 5 | 4 | 1 | 1   | 10 |
| 1006 | 4 | 4 | 1 | 6 | 5 | 5   | 4  |
| 1006 | 5 | 4 | 1 | 3 | 5 | 2.5 | 5  |
| 1006 | 5 | 4 | 5 | 6 | 2 | 4.5 | 25 |
| 1006 | 3 | 5 | 3 | 6 | 5 | 4.5 | 9  |
| 1006 | 6 | 4 | 6 | 5 | 5 | 4.5 | 36 |
| 1006 | 2 | 6 | 1 | 2 | 7 | 1   | 2  |
| 1006 | 4 | 4 | 1 | 2 | 1 | 1   | 4  |
| 1006 | 5 | 5 | 3 | 3 | 3 | 3   | 15 |
| 1006 | 5 | 4 | 4 | 4 | 2 | 3   | 20 |
| 1006 | 3 | 5 | 2 | 5 | 7 | 1.5 | 6  |
| 1006 | 6 | 6 | 4 | 5 | 4 | 3.5 | 24 |
| 1006 | 2 | 2 | 1 | 2 | 6 | 1   | 2  |
| 1006 | 5 | 5 | 3 | 3 | 6 | 2.5 | 15 |
| 1006 | 3 | 5 | 3 | 3 | 3 | 2.5 | 9  |
| 1007 | 6 | 7 | 5 | 6 | 4 | 6.5 | 30 |
| 1007 | 6 | 7 | 1 | 2 | 6 | 5   | 6  |
| 1007 | 6 | 4 | 3 | 2 | 2 | 3   | 18 |
| 1007 | 6 | 5 | 2 | 6 | 6 | 3.5 | 12 |
| 1007 | 6 | 5 | 3 | 7 | 6 | 6   | 18 |
| 1007 | 3 | 2 | 3 | 6 | 2 | 2   | 9  |
| 1007 | 6 | 7 | 3 | 5 | 4 | 5.5 | 18 |
| 1007 | 6 | 6 | 1 | 3 | 5 | 4   | 6  |
| 1007 | 6 | 2 | 1 | 2 | 2 | 2   | 6  |
| 1007 | 6 | 3 | 2 | 6 | 6 | 5   | 12 |
| 1007 | 6 | 3 | 2 | 4 | 4 | 3.5 | 12 |
| 1007 | 3 | 6 | 1 | 1 | 6 | 2.5 | 3  |
| 1007 | 6 | 7 | 2 | 2 | 2 | 1   | 12 |
| 1007 | 6 | 7 | 3 | 2 | 5 | 5.5 | 18 |

brand extension data

|      |   |   |   |   |   |     |    |
|------|---|---|---|---|---|-----|----|
| 1007 | 6 | 2 | 3 | 2 | 2 | 2.5 | 18 |
| 1007 | 6 | 2 | 1 | 6 | 6 | 4   | 6  |
| 1007 | 6 | 1 | 1 | 2 | 5 | 2   | 6  |
| 1007 | 3 | 1 | 1 | 1 | 4 | 1   | 3  |
| 1007 | 6 | 6 | 3 | 3 | 6 | 6   | 18 |
| 1007 | 6 | 2 | 1 | 4 | 5 | 6   | 6  |
| 1008 | 5 | 6 | 6 | 7 | 3 | 5   | 30 |
| 1008 | 6 | 6 | 1 | 3 | 5 | 4   | 6  |
| 1008 | 4 | 4 | 4 | 3 | 6 | 3   | 16 |
| 1008 | 4 | 5 | 1 | 4 | 6 | 2   | 4  |
| 1008 | 5 | 6 | 3 | 7 | 3 | 5   | 15 |
| 1008 | 3 | 2 | 3 | 7 | 1 | 3   | 9  |
| 1008 | 5 | 6 | 6 | 4 | 6 | 2.5 | 30 |
| 1008 | 6 | 5 | 1 | 1 | 6 | 2.5 | 6  |
| 1008 | 4 | 2 | 2 | 3 | 2 | 3   | 8  |
| 1008 | 4 | 5 | 1 | 3 | 4 | 3   | 4  |
| 1008 | 5 | 4 | 2 | 4 | 3 | 1.5 | 10 |
| 1008 | 3 | 2 | 1 | 5 | 4 | 5   | 3  |
| 1008 | 5 | 5 | 3 | 2 | 6 | 4.5 | 15 |
| 1008 | 6 | 6 | 3 | 3 | 7 | 5   | 18 |
| 1008 | 4 | 5 | 6 | 3 | 2 | 5   | 24 |
| 1008 | 4 | 5 | 1 | 3 | 6 | 2.5 | 4  |
| 1008 | 5 | 1 | 1 | 1 | 3 | 2   | 5  |
| 1008 | 3 | 1 | 1 | 1 | 5 | 1   | 3  |
| 1008 | 6 | 2 | 1 | 1 | 2 | 3   | 6  |
| 1008 | 4 | 5 | 1 | 1 | 7 | 2.5 | 4  |
| 1009 | 7 | 6 | 7 | 7 | 3 | 6   | 49 |
| 1009 | 5 | 2 | 1 | 2 | 6 | 3.5 | 5  |
| 1009 | 6 | 2 | 4 | 3 | 2 | 3.5 | 24 |
| 1009 | 4 | 2 | 5 | 4 | 5 | 4.5 | 20 |
| 1009 | 5 | 7 | 7 | 6 | 3 | 5.5 | 35 |
| 1009 | 2 | 6 | 6 | 7 | 1 | 2.5 | 12 |
| 1009 | 7 | 6 | 1 | 2 | 7 | 4.5 | 7  |
| 1009 | 6 | 5 | 5 | 5 | 3 | 5   | 30 |
| 1009 | 4 | 4 | 5 | 2 | 5 | 6.5 | 20 |
| 1009 | 5 | 3 | 6 | 5 | 2 | 5   | 30 |
| 1009 | 2 | 5 | 2 | 1 | 5 | 4   | 4  |
| 1009 | 7 | 1 | 1 | 2 | 2 | 1.5 | 7  |
| 1009 | 5 | 6 | 5 | 3 | 6 | 2.5 | 25 |
| 1009 | 6 | 6 | 6 | 6 | 2 | 5.5 | 36 |
| 1009 | 4 | 5 | 4 | 4 | 6 | 4.5 | 16 |
| 1009 | 5 | 2 | 5 | 2 | 2 | 4   | 25 |
| 1009 | 2 | 1 | 1 | 1 | 6 | 2   | 2  |
| 1009 | 5 | 5 | 2 | 2 | 6 | 3   | 10 |
| 1009 | 4 | 1 | 1 | 1 | 6 | 3   | 4  |
| 1010 | 5 | 2 | 6 | 7 | 3 | 3.5 | 30 |
| 1010 | 7 | 7 | 6 | 2 | 7 | 6   | 42 |
| 1010 | 7 | 4 | 5 | 2 | 2 | 5   | 35 |
| 1010 | 2 | 7 | 2 | 3 | 4 | 2.5 | 4  |
| 1010 | 6 | 7 | 5 | 5 | 4 | 5   | 30 |
| 1010 | 4 | 1 | 1 | 7 | 2 | 1.5 | 4  |

brand extension data

|      |   |   |   |   |   |     |    |
|------|---|---|---|---|---|-----|----|
| 1010 | 5 | 6 | 1 | 3 | 7 | 1   | 5  |
| 1010 | 7 | 5 | 4 | 2 | 3 | 4.5 | 28 |
| 1010 | 7 | 2 | 7 | 5 | 4 | 6   | 49 |
| 1010 | 2 | 6 | 2 | 3 | 4 | 2.5 | 4  |
| 1010 | 6 | 2 | 2 | 1 | 4 | 2.5 | 12 |
| 1010 | 4 | 1 | 1 | 7 | 4 | 2   | 4  |
| 1010 | 5 | 6 | 4 | 3 | 2 | 3.5 | 20 |
| 1010 | 7 | 7 | 4 | 2 | 4 | 6   | 28 |
| 1010 | 7 | 6 | 7 | 3 | 4 | 6   | 49 |
| 1010 | 2 | 6 | 2 | 1 | 5 | 2.5 | 4  |
| 1010 | 6 | 7 | 2 | 3 | 4 | 3   | 12 |
| 1010 | 4 | 1 | 1 | 1 | 3 | 1.5 | 4  |
| 1010 | 7 | 5 | 6 | 1 | 6 | 5   | 42 |
| 1010 | 2 | 2 | 2 | 1 | 4 | 3.5 | 4  |
| 1011 | 7 | 7 | 7 | 7 | 7 | 4   | 49 |
| 1011 | 7 | 7 | 7 | 1 | 2 | 6.5 | 49 |
| 1011 | 7 | 1 | 1 | 1 | 3 | 1   | 7  |
| 1011 | 3 | 1 | 1 | 1 | 6 | 1   | 3  |
| 1011 | 7 | 7 | 5 | 4 | 7 | 3   | 35 |
| 1011 | 1 | 1 | 1 | 1 | 1 | 1   | 1  |
| 1011 | 7 | 7 | 7 | 1 | 7 | 3   | 49 |
| 1011 | 7 | 7 | 1 | 1 | 1 | 7   | 7  |
| 1011 | 7 | 1 | 1 | 1 | 7 | 1   | 7  |
| 1011 | 3 | 1 | 1 | 1 | 7 | 4.5 | 3  |
| 1011 | 7 | 7 | 6 | 1 | 7 | 6   | 42 |
| 1011 | 1 | 1 | 1 | 1 | 1 | 4   | 1  |
| 1011 | 7 | 7 | 1 | 1 | 3 | 1   | 7  |
| 1011 | 7 | 7 | 1 | 1 | 3 | 6   | 7  |
| 1011 | 7 | 4 | 5 | 4 | 4 | 7   | 35 |
| 1011 | 3 | 1 | 1 | 1 | 7 | 1   | 3  |
| 1011 | 7 | 1 | 1 | 1 | 7 | 1   | 7  |
| 1011 | 1 | 1 | 1 | 1 | 1 | 1   | 1  |
| 1011 | 7 | 4 | 1 | 1 | 7 | 6.5 | 7  |
| 1011 | 3 | 1 | 1 | 1 | 3 | 5   | 3  |
| 1012 | 6 | 4 | 6 | 7 | 1 | 5.5 | 36 |
| 1012 | 5 | 4 | 1 | 2 | 5 | 4   | 5  |
| 1012 | 7 | 3 | 5 | 4 | 1 | 4.5 | 35 |
| 1012 | 5 | 5 | 3 | 7 | 3 | 3   | 15 |
| 1012 | 4 | 6 | 4 | 7 | 5 | 3.5 | 16 |
| 1012 | 5 | 1 | 3 | 6 | 2 | 4.5 | 15 |
| 1012 | 6 | 6 | 6 | 4 | 3 | 3   | 36 |
| 1012 | 5 | 1 | 3 | 3 | 2 | 2.5 | 15 |
| 1012 | 7 | 1 | 5 | 6 | 3 | 2.5 | 35 |
| 1012 | 5 | 1 | 1 | 4 | 2 | 4   | 5  |
| 1012 | 4 | 1 | 1 | 3 | 5 | 3   | 4  |
| 1012 | 5 | 1 | 1 | 1 | 1 | 2.5 | 5  |
| 1012 | 6 | 7 | 2 | 5 | 1 | 4.5 | 12 |
| 1012 | 5 | 4 | 1 | 1 | 4 | 4.5 | 5  |
| 1012 | 7 | 6 | 4 | 6 | 3 | 5.5 | 28 |
| 1012 | 5 | 1 | 1 | 3 | 6 | 3   | 5  |
| 1012 | 4 | 4 | 1 | 6 | 3 | 5.5 | 4  |

brand extension data

|      |   |   |   |   |   |     |    |
|------|---|---|---|---|---|-----|----|
| 1012 | 5 | 1 | 1 | 1 | 1 | 1   | 5  |
| 1012 | 5 | 1 | 4 | 3 | 4 | 2   | 20 |
| 1012 | 5 | 1 | 1 | 1 | 4 | 2   | 5  |
| 1013 | 6 | 7 | 6 | 7 | 6 | 5.5 | 36 |
| 1013 | 7 | 7 | 1 | 6 | 6 | 5   | 7  |
| 1013 | 6 | 6 | 2 | 4 | 1 | 5.5 | 12 |
| 1013 | 4 | 2 | 2 | 5 | 4 | 4   | 8  |
| 1013 | 6 | 6 | 5 | 7 | 4 | 6   | 30 |
| 1013 | 2 | 6 | 5 | 6 | 4 | 3   | 10 |
| 1013 | 6 | 7 | 6 | 6 | 6 | 1.5 | 36 |
| 1013 | 7 | 2 | 2 | 3 | 1 | 2.5 | 14 |
| 1013 | 6 | 1 | 6 | 2 | 3 | 2   | 36 |
| 1013 | 4 | 2 | 2 | 5 | 4 | 4.5 | 8  |
| 1013 | 6 | 2 | 5 | 1 | 3 | 1.5 | 30 |
| 1013 | 2 | 6 | 1 | 6 | 6 | 3   | 2  |
| 1013 | 6 | 7 | 1 | 2 | 1 | 3   | 6  |
| 1013 | 7 | 5 | 2 | 3 | 2 | 5.5 | 14 |
| 1013 | 6 | 6 | 6 | 6 | 3 | 6.5 | 36 |
| 1013 | 4 | 2 | 2 | 2 | 5 | 2   | 8  |
| 1013 | 6 | 2 | 2 | 2 | 4 | 2.5 | 12 |
| 1013 | 2 | 5 | 1 | 5 | 4 | 2.5 | 2  |
| 1013 | 7 | 5 | 2 | 5 | 5 | 4.5 | 14 |
| 1013 | 4 | 2 | 2 | 2 | 2 | 3   | 8  |
| 1014 | 6 | 6 | 5 | 7 | 4 | 4   | 30 |
| 1014 | 4 | 6 | 1 | 2 | 5 | 1.5 | 4  |
| 1014 | 4 | 2 | 4 | 1 | 1 | 2   | 16 |
| 1014 | 5 | 4 | 3 | 3 | 4 | 3.5 | 15 |
| 1014 | 3 | 6 | 7 | 6 | 2 | 6   | 21 |
| 1014 | 3 | 2 | 7 | 6 | 2 | 3   | 21 |
| 1014 | 6 | 3 | 2 | 4 | 6 | 1.5 | 12 |
| 1014 | 4 | 2 | 1 | 2 | 4 | 2.5 | 4  |
| 1014 | 4 | 1 | 2 | 2 | 3 | 1.5 | 8  |
| 1014 | 5 | 1 | 2 | 4 | 3 | 5   | 10 |
| 1014 | 3 | 4 | 4 | 6 | 3 | 3.5 | 12 |
| 1014 | 3 | 1 | 2 | 2 | 4 | 2   | 6  |
| 1014 | 6 | 6 | 1 | 2 | 1 | 2.5 | 6  |
| 1014 | 4 | 5 | 1 | 1 | 4 | 5.5 | 4  |
| 1014 | 4 | 1 | 5 | 2 | 2 | 3   | 20 |
| 1014 | 5 | 4 | 3 | 4 | 3 | 2   | 15 |
| 1014 | 3 | 5 | 2 | 4 | 2 | 4   | 6  |
| 1014 | 3 | 1 | 1 | 1 | 6 | 1   | 3  |
| 1014 | 4 | 2 | 2 | 1 | 6 | 2   | 8  |
| 1014 | 5 | 4 | 1 | 1 | 4 | 5   | 5  |
| 1015 | 6 | 6 | 6 | 6 | 2 | 2   | 36 |
| 1015 | 6 | 6 | 6 | 1 | 7 | 2   | 36 |
| 1015 | 5 | 2 | 1 | 2 | 2 | 4   | 5  |
| 1015 | 4 | 5 | 3 | 4 | 3 | 4   | 12 |
| 1015 | 4 | 7 | 6 | 7 | 3 | 4   | 24 |
| 1015 | 3 | 2 | 2 | 6 | 2 | 3   | 6  |
| 1015 | 6 | 6 | 6 | 1 | 6 | 1.5 | 36 |
| 1015 | 6 | 5 | 2 | 4 | 5 | 4.5 | 12 |

brand extension data

|      |   |   |   |   |   |     |    |
|------|---|---|---|---|---|-----|----|
| 1015 | 5 | 2 | 1 | 1 | 1 | 2   | 5  |
| 1015 | 4 | 5 | 3 | 4 | 3 | 4.5 | 12 |
| 1015 | 4 | 6 | 6 | 6 | 3 | 5.5 | 24 |
| 1015 | 3 | 2 | 2 | 2 | 4 | 4   | 6  |
| 1015 | 6 | 6 | 6 | 2 | 2 | 1.5 | 36 |
| 1015 | 6 | 5 | 5 | 6 | 5 | 5.5 | 30 |
| 1015 | 5 | 6 | 6 | 6 | 2 | 5   | 30 |
| 1015 | 4 | 4 | 3 | 2 | 6 | 2   | 12 |
| 1015 | 4 | 4 | 4 | 4 | 3 | 4.5 | 16 |
| 1015 | 3 | 1 | 1 | 1 | 4 | 2   | 3  |
| 1015 | 6 | 5 | 2 | 5 | 6 | 5   | 12 |
| 1015 | 4 | 1 | 1 | 2 | 5 | 2.5 | 4  |
| 1016 | 6 | 7 | 7 | 7 | 6 | 4   | 42 |
| 1016 | 6 | 7 | 1 | 1 | 6 | 2.5 | 6  |
| 1016 | 5 | 1 | 1 | 1 | 2 | 1   | 5  |
| 1016 | 4 | 3 | 2 | 1 | 4 | 2.5 | 8  |
| 1016 | 6 | 7 | 3 | 6 | 5 | 5.5 | 18 |
| 1016 | 4 | 5 | 5 | 6 | 3 | 2   | 20 |
| 1016 | 6 | 5 | 5 | 4 | 7 | 2.5 | 30 |
| 1016 | 6 | 5 | 2 | 5 | 3 | 4.5 | 12 |
| 1016 | 5 | 1 | 1 | 2 | 2 | 1   | 5  |
| 1016 | 4 | 1 | 2 | 1 | 3 | 3   | 8  |
| 1016 | 6 | 5 | 2 | 2 | 4 | 2   | 12 |
| 1016 | 4 | 7 | 1 | 1 | 6 | 1   | 4  |
| 1016 | 6 | 5 | 3 | 2 | 2 | 1   | 18 |
| 1016 | 6 | 6 | 2 | 2 | 4 | 5   | 12 |
| 1016 | 5 | 2 | 2 | 2 | 2 | 2.5 | 10 |
| 1016 | 4 | 1 | 1 | 1 | 5 | 1.5 | 4  |
| 1016 | 6 | 2 | 1 | 2 | 3 | 1   | 6  |
| 1016 | 4 | 1 | 1 | 1 | 6 | 1   | 4  |
| 1016 | 6 | 4 | 2 | 1 | 5 | 2.5 | 12 |
| 1016 | 4 | 1 | 1 | 1 | 4 | 2.5 | 4  |
| 1017 | 6 | 4 | 6 | 6 | 4 | 5   | 36 |
| 1017 | 6 | 5 | 3 | 1 | 6 | 5   | 18 |
| 1017 | 6 | 2 | 4 | 2 | 2 | 2.5 | 24 |
| 1017 | 6 | 2 | 1 | 1 | 4 | 3.5 | 6  |
| 1017 | 5 | 5 | 5 | 6 | 4 | 5.5 | 25 |
| 1017 | 3 | 6 | 6 | 6 | 1 | 5   | 18 |
| 1017 | 6 | 5 | 5 | 4 | 5 | 3.5 | 30 |
| 1017 | 6 | 3 | 1 | 1 | 2 | 2   | 6  |
| 1017 | 6 | 1 | 1 | 2 | 1 | 2   | 6  |
| 1017 | 6 | 4 | 1 | 1 | 4 | 3   | 6  |
| 1017 | 5 | 5 | 5 | 6 | 2 | 5.5 | 25 |
| 1017 | 3 | 1 | 1 | 1 | 3 | 3.5 | 3  |
| 1017 | 6 | 1 | 1 | 1 | 2 | 1.5 | 6  |
| 1017 | 6 | 4 | 1 | 1 | 2 | 6   | 6  |
| 1017 | 6 | 4 | 4 | 4 | 2 | 4   | 24 |
| 1017 | 6 | 4 | 1 | 1 | 4 | 1.5 | 6  |
| 1017 | 5 | 1 | 2 | 3 | 3 | 2   | 10 |
| 1017 | 3 | 1 | 1 | 1 | 1 | 2   | 3  |
| 1017 | 6 | 1 | 1 | 1 | 7 | 1.5 | 6  |

brand extension data

|      |   |   |   |   |   |     |    |
|------|---|---|---|---|---|-----|----|
| 1017 | 6 | 3 | 1 | 1 | 2 | 3.5 | 6  |
| 1018 | 6 | 5 | 5 | 6 | 4 | 6   | 30 |
| 1018 | 7 | 7 | 2 | 6 | 7 | 7   | 14 |
| 1018 | 6 | 1 | 1 | 2 | 4 | 3.5 | 6  |
| 1018 | 4 | 6 | 4 | 5 | 5 | 4.5 | 16 |
| 1018 | 7 | 4 | 7 | 7 | 5 | 5.5 | 49 |
| 1018 | 2 | 1 | 2 | 4 | 2 | 2   | 4  |
| 1018 | 6 | 5 | 5 | 2 | 5 | 3.5 | 30 |
| 1018 | 7 | 3 | 1 | 2 | 5 | 4   | 7  |
| 1018 | 6 | 1 | 1 | 4 | 3 | 4   | 6  |
| 1018 | 4 | 4 | 4 | 4 | 5 | 4   | 16 |
| 1018 | 7 | 4 | 7 | 7 | 6 | 6   | 49 |
| 1018 | 2 | 1 | 2 | 1 | 6 | 4   | 4  |
| 1018 | 6 | 7 | 2 | 2 | 4 | 4   | 12 |
| 1018 | 7 | 7 | 1 | 5 | 6 | 6   | 7  |
| 1018 | 6 | 4 | 3 | 4 | 3 | 5.5 | 18 |
| 1018 | 4 | 6 | 4 | 6 | 6 | 5   | 16 |
| 1018 | 7 | 6 | 2 | 4 | 5 | 4   | 14 |
| 1018 | 2 | 1 | 2 | 1 | 6 | 3.5 | 4  |
| 1018 | 7 | 4 | 1 | 2 | 7 | 6   | 7  |
| 1018 | 4 | 4 | 1 | 3 | 6 | 4.5 | 4  |
| 1019 | 7 | 7 | 7 | 7 | 6 | 6.5 | 49 |
| 1019 | 7 | 7 | 1 | 1 | 7 | 6.5 | 7  |
| 1019 | 7 | 7 | 7 | 2 | 4 | 5   | 49 |
| 1019 | 1 | 7 | 1 | 3 | 2 | 1   | 1  |
| 1019 | 7 | 6 | 5 | 7 | 3 | 6.5 | 35 |
| 1019 | 2 | 1 | 3 | 7 | 1 | 3   | 6  |
| 1019 | 7 | 7 | 4 | 2 | 6 | 4   | 28 |
| 1019 | 7 | 7 | 1 | 2 | 3 | 6.5 | 7  |
| 1019 | 7 | 7 | 4 | 4 | 4 | 3.5 | 28 |
| 1019 | 1 | 4 | 1 | 2 | 2 | 1   | 1  |
| 1019 | 7 | 3 | 5 | 6 | 3 | 1.5 | 35 |
| 1019 | 2 | 4 | 3 | 2 | 1 | 4.5 | 6  |
| 1019 | 7 | 7 | 1 | 1 | 4 | 4.5 | 7  |
| 1019 | 7 | 7 | 1 | 2 | 4 | 6.5 | 7  |
| 1019 | 7 | 7 | 6 | 4 | 4 | 6.5 | 42 |
| 1019 | 1 | 6 | 1 | 3 | 3 | 1   | 1  |
| 1019 | 7 | 3 | 1 | 4 | 2 | 4   | 7  |
| 1019 | 2 | 2 | 1 | 1 | 5 | 3   | 2  |
| 1019 | 7 | 7 | 1 | 2 | 6 | 6.5 | 7  |
| 1019 | 1 | 5 | 1 | 1 | 4 | 1   | 1  |
| 1020 | 5 | 2 | 6 | 7 | 4 | 3.5 | 30 |
| 1020 | 5 | 7 | 1 | 1 | 7 | 2.5 | 5  |
| 1020 | 5 | 2 | 6 | 2 | 2 | 5   | 30 |
| 1020 | 4 | 7 | 3 | 4 | 3 | 2.5 | 12 |
| 1020 | 5 | 6 | 5 | 7 | 3 | 5   | 25 |
| 1020 | 5 | 2 | 5 | 7 | 4 | 6   | 25 |
| 1020 | 5 | 4 | 5 | 4 | 6 | 2   | 25 |
| 1020 | 5 | 4 | 2 | 3 | 4 | 3   | 10 |
| 1020 | 5 | 1 | 3 | 5 | 2 | 2.5 | 15 |
| 1020 | 4 | 4 | 3 | 4 | 3 | 5   | 12 |

brand extension data

|      |   |   |   |   |   |     |    |
|------|---|---|---|---|---|-----|----|
| 1020 | 5 | 6 | 3 | 4 | 2 | 3.5 | 15 |
| 1020 | 5 | 2 | 1 | 1 | 6 | 1.5 | 5  |
| 1020 | 5 | 7 | 2 | 2 | 2 | 3.5 | 10 |
| 1020 | 5 | 6 | 4 | 2 | 2 | 5.5 | 20 |
| 1020 | 5 | 5 | 7 | 5 | 2 | 6.5 | 35 |
| 1020 | 4 | 3 | 1 | 3 | 3 | 1   | 4  |
| 1020 | 5 | 5 | 3 | 7 | 4 | 5   | 15 |
| 1020 | 5 | 2 | 1 | 1 | 7 | 1.5 | 5  |
| 1020 | 5 | 5 | 4 | 3 | 7 | 5   | 20 |
| 1020 | 4 | 3 | 1 | 3 | 2 | 5.5 | 4  |
| 1021 | 7 | 5 | 7 | 7 | 6 | 6.5 | 49 |
| 1021 | 7 | 6 | 2 | 1 | 5 | 4.5 | 14 |
| 1021 | 6 | 3 | 5 | 2 | 1 | 5   | 30 |
| 1021 | 5 | 4 | 3 | 4 | 3 | 5   | 15 |
| 1021 | 6 | 3 | 4 | 4 | 4 | 5   | 24 |
| 1021 | 3 | 2 | 3 | 6 | 2 | 4   | 9  |
| 1021 | 7 | 5 | 6 | 4 | 7 | 2   | 42 |
| 1021 | 7 | 6 | 3 | 1 | 2 | 3.5 | 21 |
| 1021 | 6 | 2 | 3 | 3 | 2 | 2.5 | 18 |
| 1021 | 5 | 3 | 3 | 3 | 3 | 5   | 15 |
| 1021 | 6 | 3 | 4 | 4 | 3 | 2.5 | 24 |
| 1021 | 3 | 5 | 2 | 1 | 6 | 3.5 | 6  |
| 1021 | 7 | 5 | 2 | 1 | 1 | 4.5 | 14 |
| 1021 | 7 | 6 | 3 | 1 | 3 | 5.5 | 21 |
| 1021 | 6 | 3 | 5 | 4 | 3 | 4.5 | 30 |
| 1021 | 5 | 4 | 2 | 3 | 3 | 2.5 | 10 |
| 1021 | 6 | 4 | 3 | 3 | 3 | 2.5 | 18 |
| 1021 | 3 | 3 | 1 | 1 | 3 | 2.5 | 3  |
| 1021 | 7 | 6 | 2 | 1 | 4 | 2.5 | 14 |
| 1021 | 5 | 4 | 1 | 2 | 3 | 4   | 5  |
| 1022 | 5 | 7 | 7 | 7 | 3 | 5   | 35 |
| 1022 | 5 | 7 | 2 | 3 | 4 | 5.5 | 10 |
| 1022 | 7 | 7 | 7 | 3 | 1 | 6.5 | 49 |
| 1022 | 5 | 7 | 4 | 6 | 3 | 5.5 | 20 |
| 1022 | 5 | 7 | 2 | 7 | 3 | 5   | 10 |
| 1022 | 1 | 1 | 2 | 6 | 2 | 1   | 2  |
| 1022 | 5 | 7 | 4 | 5 | 3 | 3   | 20 |
| 1022 | 5 | 7 | 2 | 3 | 2 | 4   | 10 |
| 1022 | 7 | 4 | 1 | 5 | 3 | 5   | 7  |
| 1022 | 5 | 3 | 3 | 6 | 3 | 5.5 | 15 |
| 1022 | 5 | 7 | 2 | 2 | 3 | 3.5 | 10 |
| 1022 | 1 | 6 | 2 | 1 | 7 | 1.5 | 2  |
| 1022 | 5 | 7 | 3 | 3 | 1 | 2   | 15 |
| 1022 | 5 | 7 | 3 | 2 | 4 | 5.5 | 15 |
| 1022 | 7 | 7 | 6 | 4 | 3 | 7   | 42 |
| 1022 | 5 | 7 | 6 | 5 | 4 | 6   | 30 |
| 1022 | 5 | 7 | 2 | 4 | 4 | 5.5 | 10 |
| 1022 | 1 | 6 | 2 | 3 | 4 | 1   | 2  |
| 1022 | 5 | 7 | 4 | 3 | 5 | 5.5 | 20 |
| 1022 | 5 | 5 | 4 | 1 | 4 | 5.5 | 20 |
| 1023 | 6 | 5 | 4 | 7 | 2 | 6   | 24 |

brand extension data

|      |   |   |   |   |   |     |    |
|------|---|---|---|---|---|-----|----|
| 1023 | 7 | 7 | 1 | 1 | 5 | 6.5 | 7  |
| 1023 | 6 | 2 | 3 | 1 | 1 | 5   | 18 |
| 1023 | 4 | 7 | 2 | 5 | 3 | 6   | 8  |
| 1023 | 2 | 2 | 6 | 6 | 2 | 4.5 | 12 |
| 1023 | 1 | 1 | 6 | 7 | 2 | 2.5 | 6  |
| 1023 | 6 | 5 | 3 | 6 | 3 | 1.5 | 18 |
| 1023 | 7 | 6 | 1 | 2 | 5 | 2.5 | 7  |
| 1023 | 6 | 1 | 5 | 5 | 2 | 5   | 30 |
| 1023 | 4 | 7 | 2 | 4 | 4 | 6   | 8  |
| 1023 | 2 | 3 | 3 | 3 | 2 | 6   | 6  |
| 1023 | 1 | 1 | 1 | 1 | 6 | 3.5 | 1  |
| 1023 | 6 | 7 | 1 | 2 | 1 | 2.5 | 6  |
| 1023 | 7 | 7 | 1 | 3 | 6 | 5.5 | 7  |
| 1023 | 6 | 6 | 7 | 5 | 3 | 6.5 | 42 |
| 1023 | 4 | 7 | 2 | 5 | 5 | 3.5 | 8  |
| 1023 | 2 | 5 | 1 | 2 | 2 | 3.5 | 2  |
| 1023 | 1 | 1 | 1 | 1 | 6 | 3   | 1  |
| 1023 | 7 | 6 | 1 | 2 | 5 | 6   | 7  |
| 1023 | 4 | 7 | 1 | 1 | 6 | 5   | 4  |
| 1024 | 5 | 5 | 3 | 7 | 6 | 3   | 15 |
| 1024 | 5 | 7 | 1 | 1 | 7 | 2   | 5  |
| 1024 | 6 | 4 | 3 | 2 | 4 | 1.5 | 18 |
| 1024 | 4 | 5 | 1 | 4 | 4 | 1   | 4  |
| 1024 | 7 | 6 | 2 | 6 | 4 | 4   | 14 |
| 1024 | 3 | 3 | 3 | 7 | 1 | 1   | 9  |
| 1024 | 5 | 6 | 3 | 5 | 6 | 1.5 | 15 |
| 1024 | 5 | 6 | 2 | 4 | 5 | 3.5 | 10 |
| 1024 | 6 | 3 | 1 | 3 | 2 | 4   | 6  |
| 1024 | 4 | 6 | 1 | 4 | 4 | 4   | 4  |
| 1024 | 7 | 1 | 1 | 2 | 1 | 1   | 7  |
| 1024 | 3 | 5 | 1 | 2 | 5 | 5.5 | 3  |
| 1024 | 5 | 6 | 1 | 2 | 4 | 1   | 5  |
| 1024 | 5 | 7 | 2 | 5 | 6 | 5.5 | 10 |
| 1024 | 6 | 1 | 1 | 3 | 1 | 1.5 | 6  |
| 1024 | 4 | 6 | 1 | 3 | 4 | 3.5 | 4  |
| 1024 | 7 | 7 | 1 | 4 | 3 | 3.5 | 7  |
| 1024 | 3 | 2 | 1 | 2 | 6 | 1.5 | 3  |
| 1024 | 5 | 7 | 2 | 2 | 7 | 4.5 | 10 |
| 1024 | 4 | 6 | 1 | 2 | 6 | 3   | 4  |
| 1025 | 7 | 7 | 6 | 6 | 2 | 5.5 | 42 |
| 1025 | 7 | 5 | 1 | 2 | 4 | 5   | 7  |
| 1025 | 7 | 3 | 3 | 2 | 2 | 3   | 21 |
| 1025 | 5 | 5 | 1 | 5 | 2 | 6   | 5  |
| 1025 | 5 | 4 | 3 | 3 | 2 | 6   | 15 |
| 1025 | 4 | 2 | 2 | 1 | 2 | 5.5 | 8  |
| 1025 | 7 | 7 | 3 | 2 | 2 | 2   | 21 |
| 1025 | 7 | 5 | 1 | 2 | 3 | 6   | 7  |
| 1025 | 7 | 1 | 1 | 2 | 1 | 1   | 7  |
| 1025 | 5 | 5 | 1 | 5 | 2 | 7   | 5  |
| 1025 | 5 | 4 | 3 | 3 | 2 | 1   | 15 |
| 1025 | 4 | 5 | 1 | 1 | 5 | 6.5 | 4  |

brand extension data

|      |   |   |   |   |   |     |    |
|------|---|---|---|---|---|-----|----|
| 1025 | 7 | 5 | 1 | 2 | 2 | 1   | 7  |
| 1025 | 7 | 5 | 1 | 2 | 4 | 5   | 7  |
| 1025 | 7 | 4 | 5 | 2 | 3 | 5   | 35 |
| 1025 | 5 | 5 | 1 | 5 | 2 | 5.5 | 5  |
| 1025 | 5 | 4 | 1 | 1 | 2 | 3   | 5  |
| 1025 | 4 | 2 | 1 | 1 | 4 | 1   | 4  |
| 1025 | 7 | 5 | 1 | 2 | 4 | 6   | 7  |
| 1025 | 5 | 5 | 1 | 1 | 4 | 6   | 5  |
| 1026 | 6 | 7 | 3 | 7 | 5 | 6   | 18 |
| 1026 | 5 | 6 | 1 | 2 | 7 | 4   | 5  |
| 1026 | 6 | 1 | 7 | 4 | 1 | 2.5 | 42 |
| 1026 | 4 | 4 | 1 | 3 | 7 | 2.5 | 4  |
| 1026 | 4 | 4 | 3 | 6 | 4 | 6   | 12 |
| 1026 | 1 | 7 | 6 | 5 | 1 | 1   | 6  |
| 1026 | 6 | 1 | 3 | 1 | 7 | 4   | 18 |
| 1026 | 5 | 6 | 4 | 6 | 6 | 4   | 20 |
| 1026 | 6 | 1 | 3 | 4 | 3 | 3   | 18 |
| 1026 | 4 | 4 | 1 | 4 | 5 | 3.5 | 4  |
| 1026 | 4 | 5 | 3 | 5 | 2 | 4.5 | 12 |
| 1026 | 1 | 7 | 2 | 2 | 4 | 1   | 2  |
| 1026 | 6 | 1 | 1 | 1 | 1 | 1   | 6  |
| 1026 | 5 | 6 | 4 | 6 | 6 | 5   | 20 |
| 1026 | 6 | 4 | 6 | 4 | 3 | 3.5 | 36 |
| 1026 | 4 | 1 | 1 | 1 | 7 | 1.5 | 4  |
| 1026 | 4 | 4 | 1 | 4 | 1 | 5.5 | 4  |
| 1026 | 1 | 1 | 2 | 1 | 1 | 1   | 2  |
| 1026 | 5 | 6 | 6 | 4 | 7 | 5   | 30 |
| 1026 | 4 | 3 | 1 | 2 | 6 | 4.5 | 4  |
| 1027 | 6 | 7 | 7 | 7 | 6 | 5.5 | 42 |
| 1027 | 6 | 6 | 1 | 2 | 5 | 5.5 | 6  |
| 1027 | 6 | 5 | 2 | 2 | 1 | 2   | 12 |
| 1027 | 2 | 6 | 2 | 4 | 4 | 2.5 | 4  |
| 1027 | 6 | 7 | 3 | 6 | 4 | 5   | 18 |
| 1027 | 1 | 4 | 5 | 7 | 2 | 3.5 | 5  |
| 1027 | 6 | 7 | 7 | 5 | 6 | 5   | 42 |
| 1027 | 6 | 4 | 1 | 2 | 5 | 3.5 | 6  |
| 1027 | 6 | 3 | 2 | 3 | 2 | 3   | 12 |
| 1027 | 2 | 5 | 2 | 4 | 4 | 3.5 | 4  |
| 1027 | 6 | 7 | 3 | 6 | 4 | 3.5 | 18 |
| 1027 | 1 | 5 | 1 | 2 | 6 | 4   | 1  |
| 1027 | 6 | 1 | 1 | 1 | 1 | 1.5 | 6  |
| 1027 | 6 | 5 | 2 | 2 | 4 | 6   | 12 |
| 1027 | 6 | 6 | 5 | 3 | 3 | 5   | 30 |
| 1027 | 2 | 5 | 2 | 5 | 4 | 3.5 | 4  |
| 1027 | 6 | 5 | 1 | 2 | 4 | 2   | 6  |
| 1027 | 1 | 1 | 1 | 1 | 5 | 1.5 | 1  |
| 1027 | 6 | 4 | 2 | 2 | 5 | 2.5 | 12 |
| 1027 | 2 | 2 | 1 | 1 | 4 | 2.5 | 2  |
| 1028 | 5 | 7 | 7 | 7 | 3 | 3.5 | 35 |
| 1028 | 6 | 6 | 5 | 4 | 6 | 5   | 30 |
| 1028 | 5 | 5 | 5 | 5 | 2 | 2.5 | 25 |

brand extension data

|      |   |   |   |   |   |     |    |
|------|---|---|---|---|---|-----|----|
| 1028 | 5 | 6 | 6 | 5 | 4 | 4.5 | 30 |
| 1028 | 6 | 6 | 6 | 6 | 2 | 3   | 36 |
| 1028 | 3 | 5 | 6 | 6 | 3 | 1.5 | 18 |
| 1028 | 5 | 6 | 4 | 5 | 4 | 2   | 20 |
| 1028 | 6 | 7 | 2 | 4 | 4 | 3.5 | 12 |
| 1028 | 5 | 2 | 2 | 3 | 3 | 2.5 | 10 |
| 1028 | 5 | 5 | 3 | 5 | 3 | 5   | 15 |
| 1028 | 6 | 5 | 4 | 4 | 3 | 1   | 24 |
| 1028 | 3 | 5 | 3 | 4 | 4 | 3.5 | 9  |
| 1028 | 5 | 6 | 1 | 3 | 2 | 1   | 5  |
| 1028 | 6 | 7 | 4 | 3 | 6 | 5.5 | 24 |
| 1028 | 5 | 6 | 6 | 4 | 3 | 4   | 30 |
| 1028 | 5 | 6 | 2 | 4 | 4 | 4   | 10 |
| 1028 | 6 | 5 | 1 | 4 | 2 | 2.5 | 6  |
| 1028 | 3 | 2 | 1 | 2 | 4 | 1   | 3  |
| 1028 | 6 | 6 | 3 | 2 | 7 | 4   | 18 |
| 1028 | 5 | 6 | 2 | 4 | 6 | 4.5 | 10 |
| 1    | 3 | 6 | 4 | 6 | 2 | 2.5 | 12 |
| 1    | 3 | 6 | 1 | 6 | 4 | 5   | 3  |
| 1    | 3 | 3 | 1 | 5 | 4 | 3.5 | 3  |
| 1    | 5 | 2 | 4 | 4 | 6 | 3   | 20 |
| 1    | 5 | 6 | 6 | 6 | 5 | 5.5 | 30 |
| 1    | 5 | 5 | 2 | 3 | 3 | 4   | 10 |
| 1    | 6 | 4 | 2 | 6 | 3 | 6   | 12 |
| 1    | 6 | 4 | 2 | 4 | 5 | 4.5 | 12 |
| 1    | 6 | 4 | 2 | 3 | 6 | 3.5 | 12 |
| 2    | 7 | 1 | 3 | 3 | 2 | 5.5 | 21 |
| 2    | 7 | 2 | 4 | 3 | 2 | 6.5 | 28 |
| 2    | 7 | 6 | 6 | 7 | 2 | 6.5 | 42 |
| 2    | 3 | 2 | 2 | 5 | 3 | 5   | 6  |
| 2    | 3 | 2 | 1 | 2 | 4 | 3   | 3  |
| 2    | 3 | 3 | 2 | 3 | 3 | 3   | 6  |
| 2    | 7 | 7 | 5 | 6 | 4 | 6   | 35 |
| 2    | 7 | 2 | 3 | 5 | 3 | 3.5 | 21 |
| 2    | 7 | 2 | 2 | 5 | 3 | 3.5 | 14 |
| 3    | 6 | 1 | 6 | 6 | 3 | 6   | 36 |
| 3    | 6 | 7 | 4 | 2 | 6 | 2.5 | 24 |
| 3    | 6 | 5 | 4 | 5 | 4 | 6   | 24 |
| 3    | 6 | 1 | 2 | 4 | 5 | 1.5 | 12 |
| 3    | 6 | 1 | 6 | 6 | 5 | 5   | 36 |
| 3    | 6 | 6 | 4 | 4 | 5 | 2   | 24 |
| 3    | 7 | 6 | 5 | 6 | 5 | 6   | 35 |
| 3    | 7 | 6 | 5 | 5 | 5 | 6   | 35 |
| 3    | 7 | 6 | 5 | 6 | 5 | 5   | 35 |
| 4    | 4 | 5 | 5 | 1 | 1 | 2.5 | 20 |
| 4    | 4 | 2 | 1 | 1 | 1 | 1.5 | 4  |
| 4    | 4 | 1 | 1 | 1 | 1 | 4.5 | 4  |
| 4    | 4 | 1 | 1 | 1 | 2 | 2.5 | 4  |
| 4    | 4 | 1 | 1 | 1 | 2 | 2.5 | 4  |
| 4    | 4 | 1 | 2 | 1 | 1 | 3   | 8  |
| 4    | 5 | 1 | 1 | 1 | 1 | 1   | 5  |

brand extension data

|    |   |   |   |   |   |     |    |
|----|---|---|---|---|---|-----|----|
| 4  | 5 | 1 | 1 | 1 | 1 | 1   | 5  |
| 4  | 5 | 4 | 3 | 3 | 2 | 4.5 | 15 |
| 5  | 3 | 4 | 4 | 6 | 2 | 5   | 12 |
| 5  | 3 | 5 | 2 | 3 | 6 | 4   | 6  |
| 5  | 3 | 2 | 1 | 2 | 6 | 2   | 3  |
| 5  | 5 | 5 | 4 | 3 | 5 | 3.5 | 20 |
| 5  | 5 | 7 | 5 | 5 | 3 | 4   | 25 |
| 5  | 5 | 2 | 1 | 2 | 4 | 3   | 5  |
| 5  | 5 | 4 | 3 | 3 | 4 | 3   | 15 |
| 5  | 5 | 4 | 3 | 3 | 4 | 3.5 | 15 |
| 5  | 5 | 2 | 2 | 3 | 6 | 2.5 | 10 |
| 6  | 4 | 7 | 1 | 7 | 4 | 3   | 4  |
| 6  | 4 | 5 | 1 | 4 | 6 | 3   | 4  |
| 6  | 4 | 2 | 1 | 5 | 5 | 2.5 | 4  |
| 6  | 4 | 6 | 1 | 5 | 5 | 2.5 | 4  |
| 6  | 4 | 6 | 4 | 5 | 5 | 5   | 16 |
| 6  | 4 | 2 | 1 | 3 | 4 | 2.5 | 4  |
| 6  | 6 | 1 | 1 | 4 | 4 | 2.5 | 6  |
| 6  | 6 | 3 | 1 | 2 | 3 | 2.5 | 6  |
| 6  | 6 | 3 | 1 | 6 | 6 | 6   | 6  |
| 7  | 4 | 2 | 3 | 4 | 4 | 4.5 | 12 |
| 7  | 4 | 5 | 2 | 6 | 6 | 4.5 | 8  |
| 7  | 4 | 2 | 1 | 2 | 5 | 3   | 4  |
| 7  | 6 | 2 | 3 | 3 | 5 | 3   | 18 |
| 7  | 6 | 6 | 7 | 6 | 6 | 5.5 | 42 |
| 7  | 6 | 6 | 1 | 3 | 4 | 4   | 6  |
| 7  | 6 | 4 | 1 | 6 | 5 | 4.5 | 6  |
| 7  | 6 | 3 | 2 | 2 | 7 | 2.5 | 12 |
| 7  | 6 | 1 | 2 | 2 | 7 | 3.5 | 12 |
| 8  | 5 | 6 | 1 | 5 | 3 | 6   | 5  |
| 8  | 5 | 1 | 1 | 2 | 2 | 1   | 5  |
| 8  | 5 | 1 | 1 | 2 | 5 | 1   | 5  |
| 8  | 5 | 1 | 1 | 4 | 2 | 3   | 5  |
| 8  | 5 | 1 | 4 | 5 | 4 | 4.5 | 20 |
| 8  | 5 | 1 | 1 | 2 | 2 | 1.5 | 5  |
| 8  | 6 | 1 | 1 | 3 | 2 | 1   | 6  |
| 8  | 6 | 1 | 1 | 3 | 2 | 1   | 6  |
| 8  | 6 | 1 | 1 | 3 | 2 | 2.5 | 6  |
| 9  | 6 | 7 | 6 | 7 | 5 | 6   | 36 |
| 9  | 6 | 1 | 1 | 2 | 6 | 2.5 | 6  |
| 9  | 6 | 1 | 1 | 1 | 7 | 2   | 6  |
| 9  | 5 | 3 | 1 | 2 | 6 | 2   | 5  |
| 9  | 5 | 5 | 1 | 2 | 7 | 2.5 | 5  |
| 9  | 5 | 6 | 1 | 2 | 6 | 2.5 | 5  |
| 10 | 7 | 1 | 4 | 5 | 2 | 3.5 | 28 |
| 10 | 7 | 6 | 4 | 7 | 6 | 5   | 28 |
| 10 | 7 | 2 | 1 | 3 | 3 | 1.5 | 7  |
| 10 | 3 | 1 | 3 | 2 | 5 | 1.5 | 9  |
| 10 | 3 | 6 | 7 | 7 | 6 | 4   | 21 |
| 10 | 3 | 7 | 1 | 3 | 2 | 4   | 3  |
| 10 | 5 | 4 | 1 | 7 | 5 | 5.5 | 5  |

brand extension data

|    |   |   |   |   |   |     |    |
|----|---|---|---|---|---|-----|----|
| 10 | 5 | 4 | 1 | 2 | 4 | 2.5 | 5  |
| 10 | 5 | 5 | 3 | 4 | 7 | 2   | 15 |
| 11 | 4 | 5 | 5 | 6 | 4 | 3.5 | 20 |
| 11 | 4 | 6 | 1 | 5 | 6 | 5   | 4  |
| 11 | 4 | 1 | 1 | 4 | 4 | 3   | 4  |
| 11 | 5 | 1 | 1 | 6 | 4 | 3   | 5  |
| 11 | 5 | 1 | 1 | 6 | 4 | 3   | 5  |
| 11 | 5 | 5 | 1 | 4 | 4 | 3   | 5  |
| 11 | 6 | 5 | 1 | 4 | 4 | 4.5 | 6  |
| 11 | 6 | 5 | 1 | 5 | 4 | 5.5 | 6  |
| 11 | 6 | 5 | 1 | 6 | 4 | 6   | 6  |
| 12 | 5 | 7 | 6 | 2 | 5 | 5   | 30 |
| 12 | 5 | 6 | 1 | 6 | 7 | 6   | 5  |
| 12 | 5 | 2 | 1 | 1 | 7 | 3   | 5  |
| 12 | 6 | 2 | 5 | 5 | 6 | 3   | 30 |
| 12 | 6 | 2 | 6 | 7 | 4 | 5.5 | 36 |
| 12 | 6 | 5 | 1 | 1 | 5 | 1.5 | 6  |
| 12 | 7 | 6 | 1 | 3 | 5 | 4   | 7  |
| 12 | 7 | 6 | 1 | 4 | 7 | 6   | 7  |
| 12 | 7 | 2 | 1 | 6 | 6 | 7   | 7  |
| 13 | 3 | 6 | 5 | 5 | 2 | 4   | 15 |
| 13 | 3 | 4 | 3 | 3 | 6 | 2.5 | 9  |
| 13 | 3 | 1 | 1 | 1 | 4 | 4   | 3  |
| 13 | 6 | 5 | 6 | 4 | 5 | 5   | 36 |
| 13 | 6 | 6 | 7 | 7 | 5 | 5   | 42 |
| 13 | 6 | 5 | 2 | 2 | 2 | 5   | 12 |
| 13 | 7 | 4 | 4 | 6 | 3 | 5   | 28 |
| 13 | 7 | 6 | 4 | 4 | 4 | 5.5 | 28 |
| 13 | 7 | 1 | 1 | 3 | 7 | 6   | 7  |
| 14 | 6 | 5 | 4 | 4 | 4 | 4.5 | 24 |
| 14 | 6 | 3 | 1 | 3 | 3 | 4   | 6  |
| 14 | 6 | 7 | 6 | 4 | 4 | 6   | 36 |
| 14 | 6 | 7 | 7 | 6 | 4 | 4.5 | 42 |
| 14 | 6 | 2 | 2 | 1 | 4 | 2.5 | 12 |
| 14 | 6 | 4 | 4 | 4 | 5 | 1.5 | 24 |
| 14 | 6 | 7 | 7 | 3 | 3 | 3.5 | 42 |
| 14 | 6 | 6 | 5 | 1 | 4 | 3.5 | 30 |
| 14 | 6 | 3 | 3 | 1 | 4 | 2.5 | 18 |
| 15 | 5 | 1 | 1 | 7 | 5 | 3   | 5  |
| 15 | 5 | 5 | 3 | 1 | 3 | 2   | 15 |
| 15 | 5 | 2 | 6 | 5 | 5 | 3.5 | 30 |
| 15 | 5 | 2 | 1 | 7 | 5 | 4.5 | 5  |
| 15 | 5 | 2 | 1 | 2 | 3 | 3.5 | 5  |
| 15 | 5 | 2 | 1 | 2 | 5 | 2   | 5  |
| 15 | 6 | 7 | 5 | 7 | 4 | 5   | 30 |
| 15 | 6 | 5 | 6 | 5 | 4 | 5   | 36 |
| 15 | 6 | 4 | 1 | 7 | 4 | 4   | 6  |
| 16 | 6 | 1 | 1 | 5 | 4 | 5   | 6  |
| 16 | 6 | 1 | 1 | 2 | 3 | 3.5 | 6  |
| 16 | 6 | 5 | 3 | 6 | 5 | 6.5 | 18 |
| 16 | 6 | 2 | 1 | 5 | 3 | 4   | 6  |

brand extension data

|    |   |   |   |   |   |     |    |
|----|---|---|---|---|---|-----|----|
| 16 | 6 | 5 | 1 | 2 | 2 | 2.5 | 6  |
| 16 | 6 | 6 | 1 | 4 | 4 | 6   | 6  |
| 16 | 5 | 7 | 3 | 6 | 5 | 5.5 | 15 |
| 16 | 5 | 5 | 2 | 4 | 5 | 3   | 10 |
| 16 | 5 | 4 | 1 | 3 | 4 | 5   | 5  |
| 17 | 6 | 1 | 1 | 6 | 6 | 2.5 | 6  |
| 17 | 6 | 1 | 3 | 4 | 4 | 3.5 | 18 |
| 17 | 6 | 2 | 3 | 5 | 6 | 5.5 | 18 |
| 17 | 6 | 3 | 1 | 6 | 4 | 4.5 | 6  |
| 17 | 6 | 1 | 1 | 4 | 3 | 6   | 6  |
| 17 | 6 | 3 | 1 | 4 | 3 | 6   | 6  |
| 17 | 6 | 6 | 1 | 6 | 6 | 5   | 6  |
| 17 | 6 | 5 | 1 | 6 | 6 | 6   | 6  |
| 17 | 6 | 1 | 1 | 4 | 5 | 2.5 | 6  |
| 18 | 5 | 2 | 1 | 6 | 2 | 3   | 5  |
| 18 | 5 | 2 | 1 | 3 | 2 | 2.5 | 5  |
| 18 | 5 | 3 | 1 | 3 | 3 | 4.5 | 5  |
| 18 | 5 | 3 | 1 | 4 | 3 | 3   | 5  |
| 18 | 5 | 4 | 1 | 1 | 4 | 3.5 | 5  |
| 18 | 5 | 5 | 1 | 2 | 3 | 2.5 | 5  |
| 18 | 6 | 5 | 3 | 4 | 2 | 6   | 18 |
| 18 | 6 | 3 | 1 | 2 | 4 | 3   | 6  |
| 18 | 6 | 3 | 1 | 3 | 3 | 3   | 6  |
| 19 | 6 | 1 | 1 | 3 | 2 | 1.5 | 6  |
| 19 | 6 | 1 | 1 | 1 | 2 | 2   | 6  |
| 19 | 6 | 1 | 5 | 5 | 4 | 5.5 | 30 |
| 19 | 3 | 2 | 1 | 4 | 4 | 3   | 3  |
| 19 | 3 | 2 | 1 | 1 | 5 | 2   | 3  |
| 19 | 3 | 1 | 1 | 2 | 5 | 2   | 3  |
| 19 | 5 | 4 | 1 | 3 | 3 | 4.5 | 5  |
| 19 | 5 | 1 | 1 | 2 | 4 | 3   | 5  |
| 19 | 5 | 1 | 1 | 5 | 5 | 3   | 5  |
| 20 | 7 | 5 | 4 | 5 | 4 | 6   | 28 |
| 20 | 7 | 2 | 2 | 4 | 2 | 4   | 14 |
| 20 | 7 | 2 | 1 | 6 | 3 | 5   | 7  |
| 20 | 5 | 3 | 2 | 5 | 5 | 4.5 | 10 |
| 20 | 5 | 1 | 1 | 3 | 6 | 3.5 | 5  |
| 20 | 5 | 1 | 2 | 5 | 4 | 4   | 10 |
| 20 | 6 | 6 | 6 | 7 | 4 | 6   | 36 |
| 20 | 6 | 3 | 3 | 3 | 5 | 5   | 18 |
| 20 | 6 | 4 | 2 | 4 | 4 | 4.5 | 12 |
| 21 | 2 | 6 | 4 | 6 | 3 | 2.5 | 8  |
| 21 | 2 | 5 | 1 | 2 | 6 | 2.5 | 2  |
| 21 | 2 | 2 | 1 | 1 | 5 | 2   | 2  |
| 21 | 5 | 5 | 7 | 4 | 3 | 6   | 35 |
| 21 | 5 | 6 | 7 | 6 | 3 | 5.5 | 35 |
| 21 | 5 | 4 | 1 | 2 | 3 | 2   | 5  |
| 21 | 5 | 4 | 1 | 5 | 5 | 4   | 5  |
| 21 | 5 | 4 | 1 | 3 | 6 | 4   | 5  |
| 21 | 5 | 3 | 1 | 3 | 5 | 3.5 | 5  |
| 22 | 3 | 4 | 4 | 6 | 2 | 2   | 12 |

brand extension data

|    |   |   |   |   |   |     |    |
|----|---|---|---|---|---|-----|----|
| 22 | 3 | 1 | 1 | 4 | 4 | 1   | 3  |
| 22 | 3 | 1 | 1 | 1 | 4 | 1   | 3  |
| 22 | 6 | 1 | 3 | 6 | 5 | 3.5 | 18 |
| 22 | 6 | 2 | 6 | 6 | 5 | 5.5 | 36 |
| 22 | 6 | 2 | 1 | 1 | 3 | 1   | 6  |
| 22 | 6 | 2 | 1 | 2 | 5 | 2   | 6  |
| 22 | 6 | 2 | 1 | 2 | 5 | 2   | 6  |
| 22 | 6 | 2 | 1 | 5 | 5 | 3   | 6  |
| 23 | 2 | 5 | 2 | 5 | 3 | 5   | 4  |
| 23 | 2 | 2 | 2 | 2 | 6 | 1.5 | 4  |
| 23 | 2 | 2 | 2 | 5 | 4 | 4.5 | 4  |
| 23 | 5 | 4 | 4 | 5 | 5 | 5.5 | 20 |
| 23 | 5 | 4 | 6 | 5 | 5 | 5.5 | 30 |
| 23 | 5 | 2 | 2 | 3 | 2 | 4.5 | 10 |
| 23 | 5 | 5 | 2 | 5 | 4 | 5   | 10 |
| 23 | 5 | 5 | 2 | 5 | 5 | 5   | 10 |
| 23 | 5 | 5 | 2 | 5 | 7 | 5   | 10 |
| 24 | 7 | 1 | 1 | 2 | 4 | 1   | 7  |
| 24 | 7 | 1 | 1 | 1 | 4 | 1   | 7  |
| 24 | 7 | 3 | 5 | 3 | 5 | 3.5 | 35 |
| 24 | 7 | 1 | 1 | 3 | 4 | 1   | 7  |
| 24 | 7 | 2 | 1 | 1 | 4 | 2   | 7  |
| 24 | 7 | 1 | 1 | 2 | 4 | 1   | 7  |
| 24 | 5 | 7 | 4 | 4 | 5 | 4.5 | 20 |
| 24 | 5 | 5 | 3 | 3 | 4 | 2.5 | 15 |
| 24 | 5 | 1 | 1 | 2 | 4 | 1   | 5  |
| 25 | 7 | 1 | 1 | 7 | 1 | 3.5 | 7  |
| 25 | 7 | 1 | 1 | 1 | 1 | 3.5 | 7  |
| 25 | 7 | 7 | 7 | 4 | 4 | 6.5 | 49 |
| 25 | 6 | 6 | 1 | 6 | 3 | 6   | 6  |
| 25 | 6 | 1 | 1 | 1 | 4 | 3   | 6  |
| 25 | 6 | 5 | 1 | 5 | 4 | 3.5 | 6  |
| 25 | 6 | 7 | 6 | 6 | 2 | 6.5 | 36 |
| 25 | 6 | 2 | 5 | 3 | 3 | 3   | 30 |
| 25 | 6 | 4 | 1 | 3 | 2 | 4.5 | 6  |
| 26 | 4 | 1 | 1 | 4 | 3 | 3   | 4  |
| 26 | 4 | 5 | 1 | 1 | 6 | 1   | 4  |
| 26 | 4 | 1 | 1 | 1 | 5 | 1.5 | 4  |
| 26 | 6 | 2 | 2 | 3 | 5 | 2.5 | 12 |
| 26 | 6 | 4 | 3 | 4 | 4 | 4.5 | 18 |
| 26 | 6 | 1 | 1 | 1 | 5 | 1.5 | 6  |
| 26 | 7 | 5 | 1 | 6 | 5 | 4.5 | 7  |
| 26 | 7 | 4 | 1 | 5 | 4 | 3   | 7  |
| 26 | 7 | 1 | 1 | 2 | 3 | 1   | 7  |
| 27 | 5 | 7 | 6 | 7 | 5 | 5.5 | 30 |
| 27 | 5 | 5 | 1 | 5 | 5 | 5   | 5  |
| 27 | 5 | 1 | 1 | 3 | 6 | 2.5 | 5  |
| 27 | 6 | 5 | 7 | 5 | 6 | 5.5 | 42 |
| 27 | 6 | 5 | 5 | 7 | 5 | 5   | 30 |
| 27 | 6 | 2 | 1 | 2 | 1 | 2   | 6  |
| 27 | 6 | 1 | 1 | 5 | 4 | 3   | 6  |

brand extension data

|     |   |   |   |   |   |     |    |
|-----|---|---|---|---|---|-----|----|
| 27  | 6 | 1 | 1 | 2 | 5 | 2.5 | 6  |
| 27  | 6 | 1 | 1 | 1 | 7 | 2.5 | 6  |
| 28  | 4 | 4 | 6 | 6 | 3 | 4.5 | 24 |
| 28  | 4 | 4 | 1 | 3 | 6 | 4.5 | 4  |
| 28  | 4 | 1 | 1 | 1 | 6 | 2   | 4  |
| 28  | 7 | 2 | 6 | 3 | 4 | 5.5 | 42 |
| 28  | 7 | 5 | 7 | 6 | 3 | 5   | 49 |
| 28  | 7 | 3 | 1 | 1 | 1 | 2   | 7  |
| 28  | 6 | 5 | 1 | 3 | 2 | 4   | 6  |
| 28  | 6 | 5 | 1 | 1 | 5 | 4   | 6  |
| 28  | 6 | 2 | 1 | 2 | 6 | 2.5 | 6  |
| 29  | 3 | 7 | 5 | 7 | 1 | 5.5 | 15 |
| 29  | 3 | 5 | 1 | 1 | 6 | 4   | 3  |
| 29  | 3 | 1 | 1 | 5 | 4 | 3   | 3  |
| 29  | 7 | 5 | 6 | 4 | 3 | 3.5 | 42 |
| 29  | 7 | 5 | 7 | 7 | 2 | 4   | 49 |
| 29  | 7 | 2 | 1 | 1 | 6 | 4   | 7  |
| 29  | 7 | 3 | 1 | 4 | 3 | 4   | 7  |
| 29  | 7 | 2 | 1 | 2 | 6 | 3.5 | 7  |
| 29  | 7 | 1 | 1 | 1 | 6 | 5   | 7  |
| 101 | 5 | 5 | 5 | 4 | 4 | 5.5 | 25 |
| 101 | 5 | 5 | 2 | 6 | 5 | 6   | 10 |
| 101 | 5 | 5 | 2 | 6 | 5 | 6   | 10 |
| 101 | 6 | 3 | 3 | 4 | 4 | 4.5 | 18 |
| 101 | 6 | 5 | 5 | 6 | 5 | 5.5 | 30 |
| 101 | 6 | 1 | 1 | 2 | 3 | 2.5 | 6  |
| 101 | 5 | 5 | 2 | 4 | 3 | 4.5 | 10 |
| 101 | 5 | 5 | 2 | 4 | 3 | 4   | 10 |
| 101 | 5 | 5 | 2 | 5 | 4 | 4.5 | 10 |
| 102 | 5 | 1 | 1 | 2 | 3 | 3.5 | 5  |
| 102 | 5 | 1 | 1 | 2 | 7 | 4   | 5  |
| 102 | 5 | 1 | 1 | 6 | 3 | 3.5 | 5  |
| 102 | 5 | 4 | 2 | 6 | 2 | 3.5 | 10 |
| 102 | 5 | 4 | 1 | 6 | 2 | 1   | 5  |
| 102 | 5 | 2 | 1 | 2 | 3 | 2.5 | 5  |
| 102 | 5 | 1 | 1 | 3 | 3 | 1.5 | 5  |
| 102 | 5 | 1 | 1 | 3 | 5 | 3   | 5  |
| 102 | 5 | 2 | 1 | 5 | 5 | 3.5 | 5  |
| 103 | 1 | 1 | 1 | 1 | 1 | 1   | 1  |
| 103 | 1 | 1 | 1 | 1 | 1 | 1   | 1  |
| 103 | 1 | 1 | 1 | 1 | 1 | 2   | 1  |
| 103 | 4 | 1 | 1 | 1 | 1 | 1   | 4  |
| 103 | 4 | 1 | 1 | 1 | 1 | 2.5 | 4  |
| 103 | 4 | 1 | 1 | 1 | 1 | 1   | 4  |
| 103 | 5 | 4 | 1 | 5 | 1 | 5   | 5  |
| 103 | 5 | 1 | 1 | 2 | 1 | 2   | 5  |
| 103 | 5 | 1 | 1 | 1 | 1 | 1.5 | 5  |
| 104 | 5 | 1 | 1 | 4 | 2 | 4   | 5  |
| 104 | 5 | 5 | 1 | 6 | 5 | 5.5 | 5  |
| 104 | 5 | 1 | 1 | 3 | 3 | 3   | 5  |
| 104 | 5 | 3 | 4 | 4 | 3 | 3.5 | 20 |

brand extension data

|     |   |   |   |   |   |     |    |
|-----|---|---|---|---|---|-----|----|
| 104 | 5 | 6 | 6 | 6 | 5 | 5.5 | 30 |
| 104 | 5 | 1 | 1 | 2 | 2 | 2   | 5  |
| 104 | 6 | 5 | 4 | 5 | 3 | 4.5 | 24 |
| 104 | 6 | 5 | 4 | 5 | 3 | 4   | 24 |
| 104 | 6 | 7 | 4 | 6 | 5 | 5.5 | 24 |
| 105 | 5 | 7 | 4 | 5 | 3 | 3   | 20 |
| 105 | 5 | 4 | 1 | 2 | 5 | 1   | 5  |
| 105 | 5 | 2 | 1 | 1 | 5 | 1   | 5  |
| 105 | 4 | 1 | 6 | 5 | 5 | 2.5 | 24 |
| 105 | 4 | 1 | 1 | 6 | 5 | 2   | 4  |
| 105 | 4 | 3 | 1 | 1 | 3 | 1   | 4  |
| 105 | 5 | 1 | 1 | 2 | 2 | 1   | 5  |
| 105 | 5 | 1 | 1 | 2 | 4 | 2   | 5  |
| 105 | 5 | 1 | 1 | 2 | 6 | 3   | 5  |
| 106 | 5 | 1 | 2 | 3 | 2 | 3.5 | 10 |
| 106 | 5 | 5 | 1 | 3 | 6 | 4.5 | 5  |
| 106 | 5 | 4 | 1 | 6 | 3 | 5.5 | 5  |
| 106 | 5 | 3 | 3 | 5 | 5 | 3   | 15 |
| 106 | 5 | 5 | 6 | 6 | 5 | 5.5 | 30 |
| 106 | 5 | 5 | 2 | 3 | 2 | 3   | 10 |
| 106 | 6 | 5 | 1 | 6 | 3 | 5.5 | 6  |
| 106 | 6 | 5 | 1 | 3 | 6 | 3.5 | 6  |
| 106 | 6 | 5 | 1 | 4 | 4 | 3   | 6  |
| 107 | 6 | 5 | 1 | 6 | 3 | 4   | 6  |
| 107 | 6 | 6 | 1 | 5 | 5 | 5.5 | 6  |
| 107 | 6 | 2 | 1 | 5 | 4 | 5   | 6  |
| 107 | 5 | 1 | 1 | 4 | 6 | 2.5 | 5  |
| 107 | 5 | 2 | 4 | 6 | 3 | 4   | 20 |
| 107 | 5 | 2 | 1 | 3 | 2 | 1.5 | 5  |
| 107 | 6 | 2 | 1 | 5 | 3 | 4   | 6  |
| 107 | 6 | 2 | 1 | 3 | 4 | 4   | 6  |
| 107 | 6 | 1 | 1 | 2 | 5 | 3.5 | 6  |
| 108 | 4 | 1 | 2 | 5 | 2 | 3   | 8  |
| 108 | 5 | 2 | 1 | 2 | 3 | 5   | 5  |
| 108 | 5 | 1 | 1 | 3 | 5 | 3   | 5  |
| 108 | 5 | 1 | 1 | 1 | 7 | 1   | 5  |
| 109 | 3 | 7 | 3 | 5 | 2 | 4.5 | 9  |
| 109 | 3 | 5 | 1 | 4 | 5 | 5   | 3  |
| 109 | 3 | 2 | 1 | 3 | 5 | 4   | 3  |
| 109 | 5 | 1 | 1 | 3 | 6 | 2.5 | 5  |
| 109 | 5 | 3 | 2 | 6 | 6 | 5   | 10 |
| 109 | 5 | 5 | 1 | 3 | 4 | 3.5 | 5  |
| 109 | 5 | 5 | 1 | 5 | 4 | 4   | 5  |
| 109 | 5 | 6 | 1 | 2 | 7 | 3   | 5  |
| 109 | 5 | 1 | 1 | 2 | 5 | 3   | 5  |
| 110 | 4 | 5 | 2 | 5 | 3 | 4.5 | 8  |
| 110 | 4 | 5 | 1 | 4 | 5 | 4.5 | 4  |
| 110 | 4 | 2 | 1 | 2 | 3 | 4.5 | 4  |
| 110 | 2 | 2 | 1 | 5 | 3 | 2.5 | 2  |
| 110 | 2 | 2 | 6 | 6 | 3 | 2.5 | 12 |
| 110 | 2 | 4 | 1 | 2 | 3 | 2.5 | 2  |

brand extension data

|     |   |   |   |   |   |     |    |
|-----|---|---|---|---|---|-----|----|
| 110 | 6 | 2 | 1 | 5 | 3 | 3.5 | 6  |
| 110 | 6 | 2 | 1 | 2 | 5 | 3.5 | 6  |
| 110 | 6 | 5 | 1 | 3 | 3 | 4.5 | 6  |
| 111 | 2 | 5 | 5 | 3 | 3 | 3.5 | 10 |
| 111 | 2 | 3 | 1 | 2 | 4 | 3   | 2  |
| 111 | 2 | 3 | 1 | 3 | 4 | 2.5 | 2  |
| 111 | 5 | 1 | 5 | 3 | 6 | 4.5 | 25 |
| 111 | 5 | 5 | 7 | 6 | 5 | 5.5 | 35 |
| 111 | 5 | 1 | 1 | 2 | 3 | 2   | 5  |
| 111 | 5 | 2 | 1 | 4 | 5 | 4.5 | 5  |
| 111 | 5 | 5 | 1 | 2 | 6 | 3.5 | 5  |
| 111 | 5 | 2 | 4 | 3 | 5 | 4   | 20 |
| 112 | 7 | 6 | 1 | 5 | 2 | 5.5 | 7  |
| 112 | 7 | 4 | 6 | 1 | 2 | 5.5 | 42 |
| 112 | 7 | 4 | 6 | 2 | 4 | 5.5 | 42 |
| 112 | 7 | 7 | 1 | 5 | 2 | 5.5 | 7  |
| 112 | 7 | 7 | 1 | 1 | 6 | 5.5 | 7  |
| 112 | 7 | 7 | 1 | 4 | 2 | 6.5 | 7  |
| 112 | 7 | 7 | 3 | 6 | 2 | 7   | 21 |
| 112 | 7 | 7 | 5 | 3 | 2 | 4.5 | 35 |
| 112 | 7 | 7 | 1 | 3 | 2 | 4.5 | 7  |
| 113 | 7 | 1 | 1 | 2 | 4 | 1.5 | 7  |
| 113 | 7 | 6 | 3 | 2 | 3 | 3.5 | 21 |
| 113 | 7 | 6 | 4 | 3 | 5 | 5.5 | 28 |
| 113 | 5 | 3 | 1 | 5 | 5 | 1   | 5  |
| 113 | 5 | 1 | 1 | 2 | 3 | 1   | 5  |
| 113 | 5 | 1 | 1 | 3 | 6 | 1   | 5  |
| 113 | 6 | 7 | 3 | 6 | 5 | 5.5 | 18 |
| 113 | 6 | 3 | 3 | 3 | 5 | 5   | 18 |
| 113 | 6 | 5 | 1 | 6 | 5 | 2   | 6  |
| 114 | 4 | 1 | 1 | 6 | 5 | 3.5 | 4  |
| 114 | 4 | 1 | 1 | 2 | 1 | 3   | 4  |
| 114 | 4 | 2 | 1 | 4 | 5 | 3.5 | 4  |
| 114 | 3 | 1 | 1 | 2 | 5 | 3.5 | 3  |
| 114 | 3 | 1 | 1 | 7 | 7 | 4   | 3  |
| 114 | 3 | 1 | 1 | 5 | 7 | 4   | 3  |
| 114 | 2 | 4 | 3 | 5 | 4 | 4   | 6  |
| 114 | 2 | 5 | 4 | 5 | 6 | 4   | 8  |
| 114 | 2 | 1 | 1 | 2 | 7 | 3.5 | 2  |
| 115 | 7 | 1 | 1 | 3 | 4 | 3.5 | 7  |
| 115 | 7 | 1 | 1 | 3 | 3 | 3   | 7  |
| 115 | 7 | 5 | 7 | 5 | 5 | 6.5 | 49 |
| 115 | 6 | 1 | 1 | 2 | 6 | 2.5 | 6  |
| 115 | 6 | 5 | 1 | 1 | 7 | 1   | 6  |
| 115 | 6 | 1 | 1 | 3 | 6 | 1   | 6  |
| 115 | 5 | 7 | 6 | 7 | 3 | 5.5 | 30 |
| 115 | 5 | 6 | 6 | 5 | 4 | 5.5 | 30 |
| 115 | 5 | 1 | 1 | 3 | 2 | 2.5 | 5  |
| 116 | 6 | 3 | 2 | 5 | 4 | 3.5 | 12 |
| 116 | 6 | 2 | 1 | 2 | 3 | 2.5 | 6  |
| 116 | 6 | 4 | 3 | 5 | 4 | 3   | 18 |

brand extension data

|     |   |   |   |   |   |     |    |
|-----|---|---|---|---|---|-----|----|
| 116 | 5 | 3 | 1 | 5 | 5 | 4   | 5  |
| 116 | 5 | 5 | 1 | 2 | 5 | 5.5 | 5  |
| 116 | 5 | 3 | 1 | 3 | 6 | 2.5 | 5  |
| 116 | 5 | 4 | 5 | 4 | 4 | 4.5 | 25 |
| 116 | 5 | 1 | 4 | 5 | 4 | 2.5 | 20 |
| 116 | 5 | 1 | 1 | 5 | 4 | 2.5 | 5  |
| 117 | 6 | 1 | 1 | 4 | 2 | 3   | 6  |
| 117 | 6 | 1 | 1 | 4 | 2 | 3.5 | 6  |
| 117 | 6 | 4 | 6 | 6 | 3 | 5.5 | 36 |
| 117 | 5 | 1 | 1 | 3 | 5 | 4   | 5  |
| 117 | 5 | 1 | 1 | 2 | 1 | 3   | 5  |
| 117 | 5 | 1 | 1 | 4 | 4 | 2   | 5  |
| 117 | 4 | 6 | 3 | 5 | 2 | 3.5 | 12 |
| 117 | 4 | 5 | 2 | 3 | 2 | 3   | 8  |
| 117 | 4 | 4 | 1 | 4 | 2 | 4   | 4  |
| 118 | 7 | 5 | 2 | 5 | 3 | 5   | 14 |
| 118 | 7 | 5 | 2 | 5 | 3 | 5.5 | 14 |
| 118 | 7 | 5 | 2 | 5 | 3 | 5   | 14 |
| 118 | 5 | 4 | 6 | 5 | 3 | 3   | 30 |
| 118 | 5 | 2 | 6 | 3 | 2 | 4   | 30 |
| 118 | 5 | 4 | 6 | 5 | 3 | 2.5 | 30 |
| 118 | 5 | 5 | 6 | 5 | 3 | 5.5 | 30 |
| 118 | 5 | 5 | 6 | 3 | 3 | 6   | 30 |
| 118 | 5 | 3 | 6 | 5 | 3 | 5.5 | 30 |
| 119 | 4 | 1 | 1 | 5 | 2 | 1   | 4  |
| 119 | 4 | 1 | 1 | 1 | 1 | 1   | 4  |
| 119 | 4 | 3 | 1 | 5 | 1 | 3   | 4  |
| 119 | 4 | 4 | 1 | 5 | 1 | 3.5 | 4  |
| 119 | 4 | 4 | 1 | 1 | 2 | 2.5 | 4  |
| 119 | 4 | 2 | 1 | 2 | 3 | 1.5 | 4  |
| 119 | 6 | 6 | 3 | 4 | 1 | 4.5 | 18 |
| 119 | 6 | 4 | 2 | 2 | 3 | 3.5 | 12 |
| 119 | 6 | 2 | 1 | 2 | 1 | 2.5 | 6  |
| 120 | 6 | 2 | 1 | 5 | 4 | 2.5 | 6  |
| 120 | 6 | 4 | 5 | 2 | 3 | 4   | 30 |
| 120 | 6 | 6 | 6 | 3 | 4 | 7   | 36 |
| 120 | 6 | 2 | 1 | 6 | 4 | 4   | 6  |
| 120 | 6 | 6 | 1 | 1 | 4 | 2.5 | 6  |
| 120 | 6 | 5 | 1 | 3 | 5 | 2.5 | 6  |
| 120 | 6 | 6 | 4 | 5 | 4 | 6   | 24 |
| 120 | 6 | 2 | 3 | 2 | 4 | 4.5 | 18 |
| 120 | 6 | 6 | 1 | 3 | 4 | 2   | 6  |
| 201 | 6 | 1 | 1 | 5 | 5 | 3.5 | 6  |
| 201 | 6 | 5 | 1 | 5 | 6 | 3.5 | 6  |
| 201 | 6 | 1 | 1 | 1 | 2 | 2   | 6  |
| 201 | 5 | 1 | 5 | 2 | 3 | 1.5 | 25 |
| 201 | 5 | 1 | 5 | 7 | 3 | 3   | 25 |
| 201 | 5 | 4 | 3 | 2 | 1 | 3   | 15 |
| 201 | 7 | 3 | 1 | 3 | 2 | 3   | 7  |
| 201 | 7 | 3 | 1 | 1 | 5 | 2.5 | 7  |
| 201 | 7 | 3 | 4 | 4 | 4 | 5   | 28 |

brand extension data

|     |   |   |   |   |   |     |    |
|-----|---|---|---|---|---|-----|----|
| 202 | 3 | 7 | 1 | 7 | 1 | 4   | 3  |
| 202 | 3 | 7 | 1 | 1 | 6 | 1.5 | 3  |
| 202 | 3 | 1 | 1 | 1 | 1 | 1   | 3  |
| 202 | 7 | 1 | 1 | 6 | 4 | 4   | 7  |
| 202 | 7 | 1 | 6 | 7 | 5 | 5   | 42 |
| 202 | 7 | 6 | 1 | 1 | 1 | 1   | 7  |
| 202 | 7 | 6 | 6 | 5 | 5 | 4   | 42 |
| 202 | 7 | 6 | 6 | 2 | 7 | 5   | 42 |
| 202 | 7 | 1 | 1 | 7 | 6 | 6.5 | 7  |
| 203 | 3 | 5 | 4 | 6 | 3 | 2.5 | 12 |
| 203 | 3 | 2 | 1 | 4 | 3 | 2.5 | 3  |
| 203 | 3 | 1 | 1 | 2 | 2 | 1.5 | 3  |
| 203 | 4 | 1 | 5 | 3 | 6 | 3   | 20 |
| 203 | 4 | 1 | 5 | 6 | 5 | 3.5 | 20 |
| 203 | 4 | 1 | 2 | 2 | 2 | 1.5 | 8  |
| 203 | 5 | 5 | 1 | 3 | 4 | 4   | 5  |
| 203 | 5 | 5 | 1 | 3 | 6 | 4   | 5  |
| 203 | 5 | 5 | 1 | 3 | 6 | 5   | 5  |
| 204 | 4 | 7 | 6 | 6 | 4 | 3.5 | 24 |
| 204 | 4 | 7 | 2 | 3 | 6 | 4   | 8  |
| 204 | 4 | 1 | 1 | 1 | 7 | 3   | 4  |
| 204 | 6 | 1 | 6 | 6 | 5 | 5.5 | 36 |
| 204 | 6 | 7 | 7 | 7 | 2 | 6   | 42 |
| 204 | 6 | 4 | 2 | 2 | 7 | 1.5 | 12 |
| 204 | 6 | 2 | 2 | 2 | 6 | 4   | 12 |
| 204 | 6 | 5 | 1 | 4 | 6 | 4   | 6  |
| 204 | 6 | 7 | 3 | 6 | 6 | 5.5 | 18 |
| 205 | 7 | 1 | 1 | 5 | 5 | 1.5 | 7  |
| 205 | 7 | 4 | 2 | 2 | 4 | 2.5 | 14 |
| 205 | 7 | 5 | 7 | 4 | 3 | 3.5 | 49 |
| 205 | 7 | 6 | 7 | 6 | 5 | 5.5 | 49 |
| 205 | 7 | 1 | 1 | 1 | 7 | 1.5 | 7  |
| 205 | 7 | 3 | 3 | 3 | 6 | 1.5 | 21 |
| 205 | 4 | 7 | 6 | 5 | 5 | 5   | 24 |
| 205 | 4 | 5 | 4 | 4 | 3 | 3.5 | 16 |
| 205 | 4 | 2 | 1 | 3 | 5 | 2.5 | 4  |
| 206 | 7 | 1 | 1 | 1 | 2 | 2   | 7  |
| 206 | 7 | 1 | 1 | 1 | 3 | 2.5 | 7  |
| 206 | 7 | 5 | 6 | 6 | 6 | 6.5 | 42 |
| 206 | 6 | 1 | 1 | 1 | 3 | 2.5 | 6  |
| 206 | 6 | 1 | 1 | 1 | 3 | 2.5 | 6  |
| 206 | 6 | 1 | 1 | 2 | 3 | 2.5 | 6  |
| 206 | 6 | 7 | 2 | 7 | 6 | 6   | 12 |
| 206 | 6 | 2 | 1 | 5 | 3 | 2.5 | 6  |
| 206 | 6 | 1 | 1 | 1 | 2 | 2   | 6  |
| 207 | 6 | 2 | 1 | 5 | 5 | 5.5 | 6  |
| 207 | 6 | 4 | 7 | 3 | 1 | 4   | 42 |
| 207 | 6 | 6 | 7 | 6 | 3 | 6   | 42 |
| 207 | 2 | 1 | 1 | 4 | 5 | 2.5 | 2  |
| 207 | 2 | 1 | 1 | 3 | 3 | 3   | 2  |
| 207 | 2 | 1 | 1 | 4 | 6 | 2.5 | 2  |

brand extension data

|     |   |   |   |   |   |     |    |
|-----|---|---|---|---|---|-----|----|
| 207 | 4 | 5 | 7 | 3 | 5 | 5   | 28 |
| 207 | 4 | 5 | 7 | 5 | 6 | 5.5 | 28 |
| 207 | 4 | 1 | 1 | 1 | 3 | 1.5 | 4  |
| 208 | 1 | 1 | 1 | 7 | 1 | 1   | 1  |
| 208 | 1 | 1 | 1 | 4 | 5 | 4   | 1  |
| 208 | 1 | 1 | 1 | 1 | 6 | 1   | 1  |
| 208 | 6 | 1 | 5 | 4 | 4 | 3   | 30 |
| 208 | 6 | 1 | 5 | 6 | 4 | 2   | 30 |
| 208 | 6 | 1 | 1 | 1 | 3 | 1   | 6  |
| 208 | 6 | 3 | 1 | 4 | 2 | 2.5 | 6  |
| 208 | 6 | 4 | 1 | 4 | 2 | 2.5 | 6  |
| 208 | 6 | 5 | 1 | 7 | 5 | 5.5 | 6  |
| 209 | 4 | 1 | 5 | 6 | 2 | 4   | 20 |
| 209 | 4 | 1 | 1 | 5 | 4 | 2.5 | 4  |
| 209 | 4 | 1 | 1 | 2 | 6 | 2   | 4  |
| 209 | 5 | 2 | 3 | 5 | 6 | 3.5 | 15 |
| 209 | 5 | 5 | 7 | 7 | 2 | 5.5 | 35 |
| 209 | 5 | 3 | 2 | 4 | 5 | 3.5 | 10 |
| 209 | 5 | 2 | 1 | 2 | 4 | 3   | 5  |
| 209 | 5 | 2 | 1 | 3 | 6 | 2.5 | 5  |
| 209 | 5 | 2 | 1 | 5 | 5 | 4.5 | 5  |
| 210 | 2 | 4 | 2 | 4 | 1 | 3.5 | 4  |
| 210 | 2 | 4 | 1 | 4 | 3 | 1.5 | 2  |
| 210 | 2 | 1 | 1 | 1 | 7 | 1   | 2  |
| 210 | 5 | 3 | 1 | 1 | 6 | 1.5 | 5  |
| 210 | 5 | 7 | 7 | 7 | 6 | 5.5 | 35 |
| 210 | 5 | 1 | 1 | 1 | 2 | 1   | 5  |
| 210 | 6 | 1 | 1 | 3 | 2 | 3   | 6  |
| 210 | 6 | 1 | 1 | 1 | 6 | 2   | 6  |
| 210 | 6 | 1 | 1 | 1 | 6 | 3   | 6  |
| 211 | 4 | 1 | 1 | 4 | 2 | 2.5 | 4  |
| 211 | 4 | 3 | 1 | 2 | 7 | 2.5 | 4  |
| 211 | 4 | 1 | 1 | 2 | 2 | 2.5 | 4  |
| 211 | 5 | 2 | 5 | 6 | 5 | 4   | 25 |
| 211 | 5 | 5 | 6 | 7 | 5 | 4.5 | 30 |
| 211 | 5 | 2 | 1 | 2 | 2 | 2.5 | 5  |
| 211 | 6 | 1 | 1 | 4 | 1 | 1.5 | 6  |
| 211 | 6 | 1 | 1 | 3 | 2 | 1.5 | 6  |
| 211 | 6 | 1 | 1 | 5 | 6 | 3   | 6  |
| 212 | 7 | 1 | 1 | 5 | 2 | 2   | 7  |
| 212 | 7 | 4 | 1 | 2 | 4 | 4   | 7  |
| 212 | 7 | 6 | 4 | 5 | 6 | 5.5 | 28 |
| 212 | 5 | 2 | 1 | 5 | 5 | 5.5 | 5  |
| 212 | 5 | 2 | 1 | 2 | 7 | 2.5 | 5  |
| 212 | 5 | 3 | 1 | 4 | 6 | 2   | 5  |
| 212 | 6 | 7 | 6 | 7 | 5 | 6   | 36 |
| 212 | 6 | 5 | 6 | 6 | 6 | 5   | 36 |
| 212 | 6 | 5 | 2 | 3 | 5 | 2   | 12 |
| 213 | 7 | 1 | 1 | 1 | 2 | 3   | 7  |
| 213 | 7 | 7 | 4 | 5 | 3 | 6   | 28 |
| 213 | 7 | 7 | 6 | 7 | 4 | 6.5 | 42 |

brand extension data

|     |   |   |   |   |   |     |    |
|-----|---|---|---|---|---|-----|----|
| 213 | 4 | 4 | 1 | 5 | 6 | 5.5 | 4  |
| 213 | 4 | 2 | 1 | 2 | 3 | 3   | 4  |
| 213 | 4 | 1 | 1 | 1 | 7 | 2   | 4  |
| 213 | 6 | 7 | 5 | 7 | 5 | 6.5 | 30 |
| 213 | 6 | 7 | 5 | 4 | 2 | 5.5 | 30 |
| 213 | 6 | 1 | 1 | 1 | 3 | 3.5 | 6  |
| 214 | 6 | 2 | 2 | 6 | 5 | 4   | 12 |
| 214 | 6 | 6 | 6 | 3 | 4 | 4   | 36 |
| 214 | 6 | 5 | 5 | 4 | 4 | 3   | 30 |
| 214 | 5 | 5 | 2 | 3 | 6 | 4.5 | 10 |
| 214 | 5 | 6 | 2 | 1 | 3 | 4   | 10 |
| 214 | 5 | 5 | 1 | 2 | 3 | 1.5 | 5  |
| 214 | 5 | 6 | 5 | 5 | 5 | 5.5 | 25 |
| 214 | 5 | 2 | 4 | 2 | 4 | 2.5 | 20 |
| 214 | 5 | 2 | 1 | 2 | 6 | 1   | 5  |
| 215 | 7 | 1 | 1 | 3 | 2 | 1.5 | 7  |
| 215 | 7 | 1 | 3 | 1 | 1 | 4   | 21 |
| 215 | 7 | 2 | 6 | 5 | 2 | 6   | 42 |
| 215 | 5 | 5 | 3 | 5 | 4 | 4   | 15 |
| 215 | 5 | 5 | 5 | 2 | 2 | 3.5 | 25 |
| 215 | 5 | 5 | 3 | 4 | 4 | 3   | 15 |
| 215 | 5 | 6 | 6 | 5 | 3 | 5.5 | 30 |
| 215 | 5 | 5 | 2 | 5 | 4 | 2.5 | 10 |
| 215 | 5 | 6 | 4 | 2 | 3 | 4   | 20 |
| 216 | 7 | 1 | 1 | 2 | 5 | 1.5 | 7  |
| 216 | 7 | 1 | 1 | 3 | 3 | 3   | 7  |
| 216 | 7 | 5 | 1 | 6 | 4 | 6   | 7  |
| 216 | 4 | 4 | 1 | 3 | 4 | 4   | 4  |
| 216 | 4 | 4 | 1 | 3 | 4 | 3.5 | 4  |
| 216 | 4 | 1 | 1 | 1 | 6 | 1.5 | 4  |
| 216 | 5 | 6 | 1 | 5 | 5 | 5   | 5  |
| 216 | 5 | 4 | 1 | 3 | 5 | 3   | 5  |
| 216 | 5 | 1 | 1 | 2 | 3 | 1   | 5  |
| 217 | 7 | 4 | 2 | 6 | 5 | 2   | 14 |
| 217 | 7 | 1 | 3 | 1 | 3 | 2   | 21 |
| 217 | 7 | 7 | 6 | 6 | 5 | 6   | 42 |
| 217 | 6 | 6 | 4 | 6 | 6 | 3.5 | 24 |
| 217 | 6 | 5 | 4 | 2 | 3 | 4   | 24 |
| 217 | 6 | 5 | 4 | 5 | 7 | 4.5 | 24 |
| 217 | 6 | 7 | 5 | 6 | 6 | 5   | 30 |
| 217 | 6 | 6 | 5 | 4 | 5 | 5   | 30 |
| 217 | 6 | 2 | 1 | 6 | 5 | 1.5 | 6  |
| 218 | 7 | 1 | 1 | 3 | 3 | 1   | 7  |
| 218 | 7 | 2 | 1 | 1 | 2 | 1.5 | 7  |
| 218 | 7 | 6 | 6 | 5 | 4 | 5.5 | 42 |
| 218 | 7 | 6 | 5 | 6 | 4 | 6   | 35 |
| 218 | 7 | 2 | 1 | 1 | 6 | 1   | 7  |
| 218 | 7 | 2 | 2 | 2 | 6 | 1.5 | 14 |
| 218 | 7 | 7 | 7 | 6 | 4 | 6.5 | 49 |
| 218 | 7 | 2 | 2 | 2 | 4 | 1.5 | 14 |
| 218 | 7 | 5 | 6 | 5 | 4 | 6   | 42 |

brand extension data

|     |   |   |   |   |   |     |    |
|-----|---|---|---|---|---|-----|----|
| 219 | 2 | 7 | 2 | 7 | 2 | 2   | 4  |
| 219 | 2 | 4 | 1 | 6 | 4 | 3   | 2  |
| 219 | 2 | 2 | 1 | 5 | 5 | 1   | 2  |
| 219 | 4 | 1 | 1 | 3 | 6 | 2   | 4  |
| 219 | 4 | 5 | 3 | 7 | 4 | 4   | 12 |
| 219 | 4 | 5 | 1 | 5 | 2 | 2   | 4  |
| 219 | 2 | 1 | 1 | 3 | 3 | 1.5 | 2  |
| 219 | 2 | 1 | 1 | 3 | 6 | 1.5 | 2  |
| 219 | 2 | 3 | 1 | 6 | 5 | 1.5 | 2  |
| 220 | 1 | 1 | 4 | 6 | 2 | 3.5 | 4  |
| 220 | 1 | 4 | 1 | 3 | 7 | 4   | 1  |
| 220 | 1 | 2 | 1 | 4 | 5 | 5   | 1  |
| 220 | 6 | 1 | 3 | 6 | 5 | 4.5 | 18 |
| 220 | 6 | 2 | 4 | 6 | 5 | 5.5 | 24 |
| 220 | 6 | 1 | 1 | 1 | 2 | 1.5 | 6  |
| 220 | 6 | 3 | 1 | 2 | 5 | 4   | 6  |
| 220 | 6 | 3 | 1 | 2 | 6 | 4.5 | 6  |
| 220 | 6 | 1 | 1 | 2 | 5 | 4   | 6  |
| 221 | 4 | 1 | 1 | 1 | 3 | 2.5 | 4  |
| 221 | 4 | 2 | 1 | 5 | 2 | 3.5 | 4  |
| 221 | 4 | 5 | 1 | 1 | 4 | 3   | 4  |
| 221 | 6 | 1 | 4 | 4 | 4 | 2.5 | 24 |
| 221 | 6 | 1 | 2 | 6 | 5 | 5.5 | 12 |
| 221 | 6 | 5 | 1 | 1 | 3 | 3.5 | 6  |
| 221 | 5 | 4 | 1 | 5 | 3 | 4.5 | 5  |
| 221 | 5 | 4 | 1 | 2 | 5 | 4.5 | 5  |
| 221 | 5 | 2 | 1 | 1 | 6 | 3.5 | 5  |
| 222 | 7 | 1 | 1 | 3 | 3 | 5   | 7  |
| 222 | 7 | 1 | 6 | 4 | 3 | 5   | 42 |
| 222 | 7 | 1 | 6 | 6 | 3 | 7   | 42 |
| 222 | 5 | 1 | 1 | 6 | 6 | 5.5 | 5  |
| 222 | 5 | 1 | 1 | 1 | 3 | 1   | 5  |
| 222 | 5 | 1 | 1 | 6 | 6 | 5   | 5  |
| 222 | 7 | 7 | 6 | 7 | 6 | 7   | 42 |
| 222 | 7 | 5 | 5 | 5 | 4 | 3.5 | 35 |
| 222 | 7 | 1 | 1 | 3 | 3 | 2.5 | 7  |
| 223 | 7 | 1 | 1 | 4 | 5 | 2.5 | 7  |
| 223 | 7 | 1 | 1 | 3 | 3 | 3   | 7  |
| 223 | 7 | 5 | 1 | 5 | 4 | 4.5 | 7  |
| 223 | 7 | 1 | 1 | 5 | 4 | 3   | 7  |
| 223 | 7 | 4 | 1 | 3 | 3 | 2   | 7  |
| 223 | 7 | 6 | 1 | 4 | 6 | 2.5 | 7  |
| 223 | 6 | 7 | 4 | 7 | 5 | 6.5 | 24 |
| 223 | 6 | 5 | 3 | 6 | 4 | 5.5 | 18 |
| 223 | 6 | 1 | 1 | 2 | 3 | 2   | 6  |
| 224 | 6 | 1 | 1 | 1 | 3 | 2.5 | 6  |
| 224 | 6 | 4 | 1 | 2 | 5 | 2.5 | 6  |
| 224 | 6 | 6 | 6 | 6 | 5 | 6.5 | 36 |
| 224 | 4 | 4 | 4 | 5 | 5 | 3   | 16 |
| 224 | 4 | 1 | 2 | 1 | 3 | 1   | 8  |
| 224 | 4 | 1 | 1 | 1 | 4 | 1   | 4  |

brand extension data

|     |   |   |   |   |   |     |    |
|-----|---|---|---|---|---|-----|----|
| 224 | 5 | 7 | 7 | 6 | 6 | 5   | 35 |
| 224 | 5 | 5 | 4 | 2 | 3 | 2.5 | 20 |
| 224 | 5 | 2 | 1 | 4 | 4 | 1.5 | 5  |
| 225 | 2 | 6 | 6 | 7 | 1 | 2   | 12 |
| 225 | 2 | 1 | 1 | 5 | 5 | 2   | 2  |
| 225 | 2 | 1 | 1 | 1 | 5 | 2   | 2  |
| 225 | 6 | 6 | 2 | 4 | 2 | 5   | 12 |
| 225 | 6 | 3 | 2 | 2 | 6 | 5   | 12 |
| 225 | 6 | 2 | 2 | 2 | 6 | 3.5 | 12 |
| 226 | 6 | 6 | 1 | 2 | 4 | 3.5 | 6  |
| 226 | 6 | 1 | 1 | 5 | 6 | 5.5 | 6  |
| 226 | 6 | 1 | 1 | 5 | 5 | 6.5 | 6  |
| 226 | 7 | 1 | 1 | 4 | 6 | 7   | 7  |
| 226 | 7 | 1 | 1 | 7 | 5 | 4   | 7  |
| 226 | 7 | 1 | 1 | 1 | 3 | 4   | 7  |
| 226 | 6 | 1 | 1 | 5 | 4 | 3.5 | 6  |
| 226 | 6 | 1 | 1 | 4 | 7 | 2.5 | 6  |
| 226 | 6 | 1 | 1 | 3 | 6 | 3   | 6  |
| 227 | 1 | 4 | 5 | 7 | 3 | 1.5 | 5  |
| 227 | 1 | 1 | 1 | 3 | 6 | 3.5 | 1  |
| 227 | 1 | 4 | 4 | 1 | 5 | 4   | 4  |
| 227 | 4 | 1 | 1 | 4 | 4 | 2.5 | 4  |
| 227 | 4 | 4 | 7 | 7 | 4 | 3   | 28 |
| 227 | 4 | 6 | 7 | 4 | 2 | 4   | 28 |
| 227 | 7 | 1 | 1 | 4 | 3 | 2   | 7  |
| 227 | 7 | 1 | 1 | 1 | 4 | 1.5 | 7  |
| 227 | 7 | 4 | 5 | 4 | 6 | 4   | 35 |
| 228 | 3 | 1 | 1 | 1 | 1 | 1   | 3  |
| 228 | 3 | 1 | 1 | 1 | 7 | 1   | 3  |
| 228 | 3 | 1 | 1 | 1 | 4 | 2.5 | 3  |
| 228 | 4 | 1 | 5 | 4 | 5 | 3.5 | 20 |
| 228 | 4 | 1 | 1 | 5 | 5 | 2   | 4  |
| 228 | 4 | 1 | 1 | 1 | 7 | 1   | 4  |
| 228 | 6 | 1 | 1 | 1 | 4 | 2.5 | 6  |
| 228 | 6 | 5 | 1 | 1 | 6 | 4.5 | 6  |
| 228 | 6 | 5 | 1 | 2 | 6 | 5   | 6  |
| 229 | 6 | 6 | 1 | 7 | 5 | 5   | 6  |
| 229 | 6 | 2 | 1 | 5 | 3 | 6.5 | 6  |
| 229 | 6 | 4 | 1 | 5 | 3 | 6.5 | 6  |
| 229 | 4 | 4 | 1 | 7 | 6 | 4.5 | 4  |
| 229 | 4 | 2 | 1 | 3 | 4 | 2   | 4  |
| 229 | 4 | 6 | 1 | 5 | 6 | 2   | 4  |
| 229 | 7 | 7 | 3 | 7 | 7 | 7   | 21 |
| 229 | 7 | 7 | 3 | 6 | 6 | 6   | 21 |
| 229 | 7 | 6 | 1 | 5 | 6 | 5.5 | 7  |
| 230 | 6 | 1 | 1 | 5 | 3 | 3.5 | 6  |
| 230 | 6 | 2 | 1 | 3 | 5 | 3   | 6  |
| 230 | 6 | 6 | 7 | 3 | 6 | 3.5 | 42 |
| 230 | 6 | 6 | 2 | 5 | 3 | 5   | 12 |
| 230 | 6 | 5 | 1 | 4 | 6 | 4.5 | 6  |
| 230 | 6 | 6 | 6 | 4 | 4 | 3.5 | 36 |

brand extension data

|     |   |   |   |   |   |     |    |
|-----|---|---|---|---|---|-----|----|
| 230 | 5 | 6 | 6 | 3 | 4 | 4.5 | 30 |
| 230 | 5 | 3 | 5 | 3 | 4 | 4   | 25 |
| 230 | 5 | 6 | 2 | 4 | 3 | 4.5 | 10 |
| 231 | 7 | 1 | 1 | 4 | 3 | 1   | 7  |
| 231 | 7 | 1 | 1 | 4 | 3 | 2   | 7  |
| 231 | 7 | 6 | 7 | 6 | 3 | 6.5 | 49 |
| 231 | 6 | 1 | 1 | 6 | 5 | 6.5 | 6  |
| 231 | 6 | 1 | 1 | 1 | 6 | 3.5 | 6  |
| 231 | 6 | 1 | 1 | 5 | 6 | 2.5 | 6  |
| 231 | 6 | 6 | 5 | 3 | 3 | 6.5 | 30 |
| 231 | 6 | 2 | 2 | 2 | 3 | 6   | 12 |
| 231 | 6 | 7 | 1 | 1 | 3 | 3   | 6  |
| 232 | 7 | 1 | 1 | 6 | 4 | 5   | 7  |
| 232 | 7 | 1 | 2 | 2 | 5 | 4   | 14 |
| 232 | 7 | 1 | 5 | 5 | 4 | 6.5 | 35 |
| 232 | 5 | 3 | 1 | 6 | 3 | 3.5 | 5  |
| 232 | 5 | 4 | 1 | 1 | 5 | 3   | 5  |
| 232 | 5 | 5 | 1 | 2 | 7 | 3   | 5  |
| 232 | 7 | 7 | 1 | 6 | 3 | 6.5 | 7  |
| 232 | 7 | 4 | 1 | 2 | 5 | 3.5 | 7  |
| 232 | 7 | 1 | 1 | 7 | 3 | 2.5 | 7  |
| 233 | 7 | 1 | 1 | 5 | 5 | 5   | 7  |
| 233 | 7 | 4 | 7 | 3 | 3 | 3.5 | 49 |
| 233 | 7 | 5 | 7 | 3 | 4 | 6.5 | 49 |
| 233 | 5 | 6 | 1 | 5 | 5 | 3   | 5  |
| 233 | 5 | 6 | 1 | 1 | 6 | 3   | 5  |
| 233 | 5 | 4 | 1 | 5 | 6 | 1   | 5  |
| 233 | 6 | 7 | 1 | 5 | 4 | 6.5 | 6  |
| 233 | 6 | 6 | 4 | 5 | 4 | 6.5 | 24 |
| 233 | 6 | 6 | 1 | 2 | 4 | 2.5 | 6  |
| 234 | 6 | 1 | 1 | 2 | 5 | 1.5 | 6  |
| 234 | 6 | 4 | 5 | 2 | 2 | 3.5 | 30 |
| 234 | 6 | 6 | 6 | 6 | 5 | 5.5 | 36 |
| 234 | 6 | 3 | 1 | 3 | 6 | 4   | 6  |
| 234 | 6 | 2 | 1 | 1 | 2 | 1.5 | 6  |
| 234 | 6 | 1 | 1 | 1 | 6 | 1   | 6  |
| 234 | 6 | 7 | 6 | 6 | 5 | 6.5 | 36 |
| 234 | 6 | 5 | 3 | 4 | 3 | 4.5 | 18 |
| 234 | 6 | 2 | 1 | 2 | 2 | 3.5 | 6  |
| 235 | 6 | 2 | 1 | 2 | 5 | 3   | 6  |
| 235 | 6 | 1 | 1 | 5 | 3 | 4.5 | 6  |
| 235 | 6 | 5 | 5 | 6 | 5 | 5.5 | 30 |
| 235 | 5 | 2 | 1 | 5 | 6 | 2.5 | 5  |
| 235 | 5 | 1 | 1 | 2 | 6 | 2   | 5  |
| 235 | 5 | 3 | 1 | 4 | 4 | 3.5 | 5  |
| 235 | 4 | 1 | 1 | 7 | 5 | 2.5 | 4  |
| 235 | 4 | 2 | 1 | 3 | 4 | 3.5 | 4  |
| 235 | 4 | 1 | 1 | 3 | 5 | 1.5 | 4  |
| 236 | 3 | 5 | 1 | 6 | 2 | 3.5 | 3  |
| 236 | 3 | 1 | 1 | 2 | 6 | 1   | 3  |
| 236 | 3 | 4 | 1 | 2 | 6 | 4.5 | 3  |

brand extension data

|     |   |   |   |   |   |     |    |
|-----|---|---|---|---|---|-----|----|
| 236 | 6 | 1 | 1 | 3 | 6 | 1   | 6  |
| 236 | 6 | 6 | 4 | 7 | 2 | 4.5 | 24 |
| 236 | 6 | 1 | 1 | 1 | 7 | 1.5 | 6  |
| 236 | 6 | 3 | 2 | 4 | 5 | 4   | 12 |
| 236 | 6 | 6 | 2 | 6 | 4 | 5.5 | 12 |
| 236 | 6 | 4 | 2 | 5 | 4 | 4   | 12 |
| 237 | 4 | 1 | 1 | 5 | 3 | 4   | 4  |
| 237 | 4 | 1 | 1 | 2 | 3 | 4   | 4  |
| 237 | 4 | 5 | 1 | 5 | 4 | 4   | 4  |
| 237 | 6 | 5 | 4 | 5 | 4 | 5   | 24 |
| 237 | 6 | 2 | 1 | 1 | 5 | 3.5 | 6  |
| 237 | 6 | 6 | 5 | 5 | 7 | 5.5 | 30 |
| 237 | 5 | 7 | 5 | 5 | 6 | 4.5 | 25 |
| 237 | 5 | 5 | 5 | 4 | 4 | 4   | 25 |
| 237 | 5 | 5 | 1 | 1 | 3 | 3.5 | 5  |
| 238 | 1 | 7 | 5 | 7 | 2 | 2   | 5  |
| 238 | 1 | 4 | 1 | 2 | 3 | 4   | 1  |
| 238 | 1 | 2 | 1 | 1 | 3 | 4.5 | 1  |
| 238 | 3 | 3 | 5 | 6 | 6 | 4   | 15 |
| 238 | 3 | 6 | 6 | 7 | 6 | 3.5 | 18 |
| 238 | 3 | 5 | 1 | 3 | 1 | 3.5 | 3  |
| 238 | 6 | 6 | 1 | 5 | 2 | 4.5 | 6  |
| 238 | 6 | 7 | 1 | 2 | 4 | 5   | 6  |
| 238 | 6 | 7 | 1 | 3 | 5 | 6.5 | 6  |
| 239 | 6 | 1 | 1 | 1 | 5 | 1.5 | 6  |
| 239 | 6 | 3 | 3 | 3 | 1 | 4.5 | 18 |
| 239 | 6 | 6 | 7 | 7 | 5 | 7   | 42 |
| 239 | 5 | 3 | 1 | 4 | 7 | 3.5 | 5  |
| 239 | 5 | 4 | 1 | 1 | 2 | 1   | 5  |
| 239 | 5 | 1 | 1 | 3 | 6 | 1.5 | 5  |
| 239 | 4 | 7 | 5 | 6 | 7 | 5   | 20 |
| 239 | 4 | 5 | 3 | 4 | 7 | 4.5 | 12 |
| 239 | 4 | 3 | 1 | 1 | 7 | 1.5 | 4  |
| 240 | 7 | 1 | 1 | 1 | 6 | 1   | 7  |
| 240 | 7 | 7 | 5 | 5 | 6 | 7   | 35 |
| 240 | 7 | 6 | 7 | 7 | 1 | 7   | 49 |
| 240 | 5 | 1 | 1 | 4 | 7 | 3.5 | 5  |
| 240 | 5 | 1 | 1 | 1 | 3 | 1.5 | 5  |
| 240 | 5 | 1 | 1 | 2 | 7 | 1   | 5  |
| 240 | 6 | 7 | 7 | 7 | 7 | 3.5 | 42 |
| 240 | 6 | 7 | 6 | 4 | 3 | 1   | 36 |
| 240 | 6 | 4 | 1 | 2 | 2 | 2.5 | 6  |
| 241 | 7 | 1 | 1 | 1 | 6 | 1   | 7  |
| 241 | 7 | 4 | 6 | 4 | 6 | 5   | 42 |
| 241 | 7 | 7 | 6 | 7 | 6 | 7   | 42 |
| 241 | 7 | 5 | 1 | 6 | 6 | 5   | 7  |
| 241 | 7 | 3 | 1 | 1 | 3 | 6   | 7  |
| 241 | 7 | 1 | 1 | 3 | 6 | 1   | 7  |
| 241 | 5 | 7 | 6 | 7 | 6 | 6   | 30 |
| 241 | 5 | 7 | 6 | 4 | 6 | 2   | 30 |
| 241 | 5 | 4 | 1 | 2 | 6 | 6   | 5  |

brand extension data

|     |   |   |   |   |   |     |    |
|-----|---|---|---|---|---|-----|----|
| 242 | 7 | 1 | 1 | 3 | 5 | 3   | 7  |
| 242 | 7 | 6 | 3 | 6 | 5 | 6.5 | 21 |
| 242 | 7 | 6 | 7 | 7 | 6 | 7   | 49 |
| 242 | 5 | 6 | 1 | 6 | 6 | 5.5 | 5  |
| 242 | 5 | 2 | 1 | 3 | 3 | 2.5 | 5  |
| 242 | 5 | 1 | 1 | 1 | 4 | 1.5 | 5  |
| 242 | 6 | 7 | 6 | 6 | 4 | 6   | 36 |
| 242 | 6 | 6 | 6 | 6 | 6 | 6   | 36 |
| 242 | 6 | 1 | 1 | 2 | 2 | 1   | 6  |
| 301 | 6 | 2 | 1 | 6 | 5 | 2.5 | 6  |
| 301 | 6 | 2 | 1 | 2 | 2 | 2.5 | 6  |
| 301 | 6 | 6 | 4 | 5 | 5 | 5   | 24 |
| 301 | 6 | 5 | 1 | 6 | 3 | 4.5 | 6  |
| 301 | 6 | 1 | 1 | 1 | 4 | 2.5 | 6  |
| 301 | 6 | 1 | 1 | 4 | 6 | 2   | 6  |
| 301 | 6 | 6 | 4 | 5 | 3 | 5   | 24 |
| 301 | 6 | 4 | 2 | 2 | 4 | 4   | 12 |
| 301 | 6 | 1 | 1 | 4 | 3 | 1.5 | 6  |
| 302 | 7 | 1 | 1 | 4 | 3 | 3   | 7  |
| 302 | 7 | 1 | 1 | 4 | 3 | 4   | 7  |
| 302 | 7 | 7 | 7 | 7 | 3 | 7   | 49 |
| 302 | 5 | 2 | 1 | 3 | 4 | 3.5 | 5  |
| 302 | 5 | 3 | 1 | 1 | 6 | 6   | 5  |
| 302 | 5 | 3 | 1 | 1 | 5 | 1   | 5  |
| 302 | 7 | 7 | 7 | 7 | 4 | 7   | 49 |
| 302 | 7 | 7 | 7 | 6 | 4 | 7   | 49 |
| 302 | 7 | 2 | 1 | 2 | 4 | 6   | 7  |
| 303 | 7 | 1 | 1 | 3 | 4 | 4   | 7  |
| 303 | 7 | 4 | 2 | 3 | 3 | 5.5 | 14 |
| 303 | 7 | 5 | 7 | 4 | 4 | 6.5 | 49 |
| 303 | 3 | 3 | 7 | 4 | 4 | 4   | 21 |
| 303 | 3 | 2 | 1 | 2 | 3 | 2   | 3  |
| 303 | 3 | 2 | 1 | 2 | 5 | 1.5 | 3  |
| 303 | 4 | 4 | 1 | 5 | 4 | 4   | 4  |
| 303 | 4 | 4 | 6 | 4 | 4 | 4   | 24 |
| 303 | 4 | 4 | 1 | 4 | 4 | 4   | 4  |
| 304 | 7 | 1 | 1 | 5 | 4 | 3   | 7  |
| 304 | 7 | 4 | 5 | 5 | 2 | 6   | 35 |
| 304 | 7 | 5 | 6 | 5 | 2 | 6.5 | 42 |
| 304 | 5 | 6 | 1 | 4 | 3 | 5.5 | 5  |
| 304 | 5 | 5 | 1 | 5 | 4 | 4.5 | 5  |
| 304 | 5 | 3 | 1 | 4 | 4 | 3.5 | 5  |
| 304 | 5 | 2 | 3 | 5 | 3 | 3.5 | 15 |
| 304 | 5 | 5 | 6 | 5 | 4 | 5.5 | 30 |
| 304 | 5 | 5 | 4 | 6 | 4 | 4   | 20 |
| 305 | 6 | 1 | 1 | 4 | 3 | 5   | 6  |
| 305 | 6 | 1 | 1 | 1 | 2 | 5.5 | 6  |
| 305 | 6 | 3 | 3 | 1 | 3 | 6   | 18 |
| 305 | 5 | 2 | 1 | 3 | 4 | 5   | 5  |
| 305 | 5 | 2 | 1 | 1 | 5 | 4.5 | 5  |
| 305 | 5 | 2 | 1 | 1 | 6 | 2   | 5  |

brand extension data

|     |   |   |   |   |   |     |    |
|-----|---|---|---|---|---|-----|----|
| 305 | 4 | 5 | 1 | 5 | 3 | 5   | 4  |
| 305 | 4 | 5 | 1 | 5 | 3 | 5   | 4  |
| 305 | 4 | 1 | 1 | 1 | 4 | 2.5 | 4  |
| 306 | 5 | 1 | 1 | 2 | 2 | 2.5 | 5  |
| 306 | 5 | 6 | 5 | 3 | 2 | 4.5 | 25 |
| 306 | 5 | 4 | 7 | 5 | 4 | 6   | 35 |
| 306 | 3 | 3 | 1 | 2 | 4 | 1.5 | 3  |
| 306 | 3 | 1 | 1 | 1 | 1 | 1   | 3  |
| 306 | 3 | 1 | 1 | 2 | 5 | 1   | 3  |
| 306 | 5 | 7 | 5 | 7 | 3 | 5.5 | 25 |
| 306 | 5 | 4 | 4 | 4 | 2 | 4.5 | 20 |
| 306 | 5 | 4 | 1 | 5 | 3 | 4   | 5  |
| 307 | 6 | 1 | 1 | 4 | 5 | 4   | 6  |
| 307 | 6 | 1 | 1 | 1 | 2 | 1.5 | 6  |
| 307 | 6 | 5 | 4 | 6 | 5 | 6   | 24 |
| 307 | 4 | 2 | 1 | 5 | 4 | 2   | 4  |
| 307 | 4 | 1 | 1 | 1 | 7 | 1   | 4  |
| 307 | 4 | 1 | 1 | 1 | 7 | 1   | 4  |
| 307 | 5 | 6 | 1 | 6 | 4 | 5   | 5  |
| 307 | 5 | 2 | 1 | 4 | 6 | 2.5 | 5  |
| 307 | 5 | 1 | 1 | 1 | 6 | 1.5 | 5  |
| 308 | 6 | 1 | 1 | 4 | 4 | 3   | 6  |
| 308 | 6 | 1 | 3 | 4 | 2 | 4   | 18 |
| 308 | 6 | 4 | 6 | 6 | 5 | 6   | 36 |
| 308 | 5 | 1 | 1 | 5 | 3 | 4   | 5  |
| 308 | 5 | 3 | 2 | 3 | 5 | 3   | 10 |
| 308 | 5 | 2 | 1 | 3 | 4 | 3   | 5  |
| 308 | 4 | 6 | 4 | 5 | 3 | 5   | 16 |
| 308 | 4 | 4 | 2 | 3 | 3 | 4   | 8  |
| 308 | 4 | 1 | 1 | 3 | 3 | 2   | 4  |
| 309 | 7 | 1 | 1 | 1 | 1 | 2.5 | 7  |
| 309 | 7 | 1 | 1 | 1 | 3 | 5.5 | 7  |
| 309 | 7 | 6 | 6 | 7 | 6 | 7   | 42 |
| 309 | 5 | 1 | 1 | 5 | 5 | 3   | 5  |
| 309 | 5 | 3 | 1 | 2 | 5 | 3   | 5  |
| 309 | 5 | 1 | 1 | 1 | 6 | 1   | 5  |
| 309 | 5 | 5 | 6 | 6 | 4 | 5   | 30 |
| 309 | 5 | 6 | 6 | 5 | 5 | 6   | 30 |
| 309 | 5 | 1 | 1 | 1 | 4 | 1   | 5  |
| 310 | 7 | 1 | 1 | 2 | 4 | 1   | 7  |
| 310 | 7 | 1 | 2 | 5 | 2 | 3.5 | 14 |
| 310 | 7 | 5 | 4 | 7 | 6 | 7   | 28 |
| 310 | 5 | 6 | 1 | 5 | 5 | 4.5 | 5  |
| 310 | 5 | 2 | 1 | 2 | 3 | 1.5 | 5  |
| 310 | 5 | 1 | 1 | 1 | 4 | 1   | 5  |
| 310 | 6 | 7 | 5 | 7 | 4 | 6.5 | 30 |
| 310 | 6 | 5 | 6 | 6 | 3 | 6   | 36 |
| 310 | 6 | 1 | 1 | 3 | 2 | 1   | 6  |
| 311 | 4 | 1 | 1 | 4 | 5 | 4.5 | 4  |
| 311 | 4 | 5 | 5 | 4 | 4 | 4.5 | 20 |
| 311 | 4 | 5 | 5 | 5 | 4 | 4   | 20 |

brand extension data

|     |   |   |   |   |   |     |    |
|-----|---|---|---|---|---|-----|----|
| 311 | 1 | 3 | 1 | 3 | 4 | 2   | 1  |
| 311 | 1 | 6 | 1 | 2 | 5 | 2   | 1  |
| 311 | 1 | 5 | 1 | 2 | 5 | 2.5 | 1  |
| 311 | 3 | 7 | 4 | 6 | 4 | 4.5 | 12 |
| 311 | 3 | 5 | 4 | 6 | 4 | 4.5 | 12 |
| 311 | 3 | 3 | 1 | 5 | 5 | 3.5 | 3  |
| 312 | 7 | 1 | 1 | 2 | 4 | 3   | 7  |
| 312 | 7 | 1 | 1 | 2 | 2 | 3   | 7  |
| 312 | 7 | 2 | 3 | 4 | 5 | 5.5 | 21 |
| 312 | 6 | 2 | 1 | 6 | 7 | 6.5 | 6  |
| 312 | 6 | 1 | 1 | 2 | 2 | 3   | 6  |
| 312 | 6 | 1 | 1 | 1 | 5 | 1.5 | 6  |
| 312 | 5 | 6 | 1 | 6 | 5 | 5   | 5  |
| 312 | 5 | 3 | 1 | 6 | 5 | 6   | 5  |
| 312 | 5 | 1 | 1 | 3 | 4 | 1.5 | 5  |
| 313 | 7 | 1 | 1 | 4 | 2 | 3   | 7  |
| 313 | 7 | 3 | 1 | 4 | 2 | 5   | 7  |
| 313 | 7 | 4 | 7 | 6 | 2 | 6.5 | 49 |
| 313 | 5 | 5 | 1 | 4 | 5 | 3.5 | 5  |
| 313 | 5 | 6 | 1 | 2 | 3 | 4   | 5  |
| 313 | 5 | 5 | 1 | 3 | 5 | 2   | 5  |
| 313 | 4 | 4 | 4 | 5 | 5 | 4   | 16 |
| 313 | 4 | 3 | 4 | 4 | 3 | 3   | 16 |
| 313 | 4 | 6 | 1 | 3 | 4 | 2   | 4  |
| 314 | 6 | 1 | 1 | 2 | 4 | 3   | 6  |
| 314 | 6 | 5 | 1 | 3 | 4 | 4   | 6  |
| 314 | 6 | 6 | 5 | 6 | 6 | 6   | 30 |
| 314 | 6 | 5 | 1 | 2 | 4 | 2   | 6  |
| 314 | 6 | 5 | 1 | 1 | 7 | 1   | 6  |
| 314 | 6 | 1 | 1 | 2 | 5 | 2   | 6  |
| 314 | 5 | 7 | 4 | 6 | 4 | 5.5 | 20 |
| 314 | 5 | 4 | 5 | 6 | 4 | 5   | 25 |
| 314 | 5 | 1 | 1 | 2 | 2 | 1.5 | 5  |
| 315 | 6 | 1 | 1 | 2 | 2 | 3   | 6  |
| 315 | 6 | 1 | 1 | 2 | 2 | 3.5 | 6  |
| 315 | 6 | 1 | 1 | 4 | 2 | 4.5 | 6  |
| 315 | 6 | 1 | 1 | 6 | 4 | 6   | 6  |
| 315 | 6 | 1 | 1 | 1 | 2 | 4   | 6  |
| 315 | 6 | 1 | 1 | 4 | 2 | 3   | 6  |
| 315 | 5 | 5 | 4 | 6 | 2 | 5   | 20 |
| 315 | 5 | 4 | 1 | 6 | 2 | 4.5 | 5  |
| 315 | 5 | 1 | 1 | 1 | 5 | 3   | 5  |
| 316 | 7 | 1 | 1 | 3 | 6 | 2   | 7  |
| 316 | 7 | 1 | 1 | 1 | 1 | 2.5 | 7  |
| 316 | 7 | 4 | 1 | 6 | 6 | 6.5 | 7  |
| 316 | 7 | 5 | 1 | 4 | 5 | 6.5 | 7  |
| 316 | 7 | 3 | 1 | 3 | 6 | 4   | 7  |
| 316 | 7 | 1 | 1 | 2 | 3 | 1   | 7  |
| 316 | 6 | 5 | 1 | 5 | 3 | 6   | 6  |
| 316 | 6 | 2 | 1 | 5 | 6 | 4   | 6  |
| 316 | 6 | 1 | 1 | 3 | 5 | 3   | 6  |

brand extension data

|     |   |   |   |   |   |     |    |
|-----|---|---|---|---|---|-----|----|
| 317 | 4 | 1 | 5 | 7 | 2 | 5   | 20 |
| 317 | 4 | 7 | 1 | 3 | 7 | 5   | 4  |
| 317 | 4 | 4 | 1 | 2 | 5 | 5   | 4  |
| 317 | 7 | 1 | 1 | 1 | 7 | 1   | 7  |
| 317 | 7 | 5 | 7 | 7 | 7 | 5   | 49 |
| 317 | 7 | 2 | 2 | 2 | 3 | 4.5 | 14 |
| 317 | 7 | 1 | 1 | 3 | 5 | 3   | 7  |
| 317 | 7 | 1 | 1 | 1 | 7 | 2   | 7  |
| 317 | 7 | 1 | 1 | 5 | 5 | 2.5 | 7  |
| 318 | 4 | 1 | 2 | 6 | 3 | 4   | 8  |
| 318 | 4 | 1 | 4 | 6 | 3 | 4   | 16 |
| 318 | 4 | 6 | 6 | 6 | 4 | 2.5 | 24 |
| 318 | 6 | 3 | 1 | 5 | 2 | 3   | 6  |
| 318 | 6 | 3 | 1 | 1 | 6 | 2.5 | 6  |
| 318 | 6 | 1 | 1 | 2 | 4 | 1   | 6  |
| 318 | 6 | 7 | 4 | 6 | 3 | 6   | 24 |
| 318 | 6 | 1 | 1 | 5 | 5 | 3   | 6  |
| 318 | 6 | 1 | 1 | 2 | 4 | 1.5 | 6  |
| 401 | 5 | 3 | 1 | 7 | 5 | 2   | 5  |
| 401 | 5 | 1 | 1 | 4 | 7 | 3   | 5  |
| 401 | 5 | 1 | 1 | 1 | 7 | 1   | 5  |
| 401 | 7 | 6 | 1 | 7 | 4 | 5   | 7  |
| 401 | 7 | 6 | 1 | 7 | 4 | 5   | 7  |
| 401 | 7 | 4 | 1 | 4 | 1 | 3.5 | 7  |
| 401 | 7 | 7 | 1 | 7 | 4 | 6   | 7  |
| 401 | 7 | 7 | 1 | 1 | 4 | 5.5 | 7  |
| 401 | 7 | 7 | 1 | 7 | 4 | 4.5 | 7  |
| 402 | 4 | 1 | 1 | 5 | 3 | 2   | 4  |
| 402 | 4 | 1 | 1 | 3 | 3 | 3.5 | 4  |
| 402 | 4 | 1 | 1 | 7 | 4 | 4.5 | 4  |
| 402 | 4 | 3 | 7 | 7 | 3 | 2.5 | 28 |
| 402 | 4 | 1 | 1 | 7 | 2 | 1   | 4  |
| 402 | 4 | 4 | 1 | 7 | 1 | 1.5 | 4  |
| 402 | 5 | 1 | 1 | 7 | 3 | 1   | 5  |
| 402 | 5 | 1 | 1 | 7 | 4 | 1.5 | 5  |
| 402 | 5 | 1 | 1 | 7 | 4 | 2   | 5  |
| 403 | 5 | 6 | 6 | 6 | 4 | 3   | 30 |
| 403 | 5 | 5 | 6 | 6 | 6 | 4.5 | 30 |
| 403 | 5 | 4 | 3 | 3 | 4 | 2.5 | 15 |
| 403 | 2 | 6 | 6 | 4 | 4 | 2.5 | 12 |
| 403 | 2 | 6 | 6 | 4 | 4 | 2.5 | 12 |
| 403 | 2 | 4 | 2 | 4 | 4 | 2   | 4  |
| 403 | 6 | 6 | 3 | 6 | 4 | 5   | 18 |
| 403 | 6 | 6 | 3 | 6 | 4 | 4.5 | 18 |
| 403 | 6 | 6 | 3 | 6 | 4 | 4.5 | 18 |
| 404 | 4 | 6 | 3 | 4 | 3 | 5   | 12 |
| 404 | 4 | 3 | 1 | 3 | 5 | 4   | 4  |
| 404 | 4 | 4 | 1 | 3 | 4 | 4   | 4  |
| 404 | 4 | 5 | 5 | 4 | 5 | 4.5 | 20 |
| 404 | 4 | 5 | 6 | 5 | 5 | 4   | 24 |
| 404 | 4 | 2 | 1 | 3 | 6 | 3.5 | 4  |

brand extension data

|     |   |   |   |   |   |     |    |
|-----|---|---|---|---|---|-----|----|
| 404 | 5 | 4 | 2 | 4 | 5 | 5   | 10 |
| 404 | 5 | 4 | 2 | 3 | 5 | 4.5 | 10 |
| 404 | 5 | 6 | 4 | 4 | 5 | 5.5 | 20 |
| 405 | 7 | 7 | 5 | 7 | 6 | 3.5 | 35 |
| 405 | 7 | 1 | 1 | 1 | 3 | 1.5 | 7  |
| 405 | 7 | 1 | 4 | 7 | 7 | 5   | 28 |
| 405 | 7 | 1 | 7 | 7 | 7 | 4.5 | 49 |
| 405 | 7 | 7 | 1 | 1 | 3 | 1   | 7  |
| 405 | 6 | 1 | 1 | 4 | 4 | 3   | 6  |
| 405 | 6 | 1 | 1 | 3 | 4 | 5   | 6  |
| 405 | 6 | 7 | 1 | 4 | 5 | 3.5 | 6  |
| 406 | 6 | 5 | 3 | 4 | 4 | 4   | 18 |
| 406 | 6 | 1 | 1 | 4 | 5 | 3.5 | 6  |
| 406 | 4 | 3 | 3 | 5 | 4 | 4   | 12 |
| 406 | 4 | 2 | 3 | 5 | 4 | 3   | 12 |
| 406 | 4 | 3 | 1 | 4 | 4 | 4   | 4  |
| 406 | 4 | 3 | 1 | 4 | 5 | 3.5 | 4  |
| 407 | 3 | 5 | 5 | 4 | 4 | 3   | 15 |
| 407 | 3 | 5 | 5 | 3 | 5 | 3   | 15 |
| 407 | 3 | 3 | 5 | 3 | 4 | 3   | 15 |
| 407 | 3 | 5 | 5 | 4 | 3 | 3   | 15 |
| 407 | 3 | 5 | 5 | 4 | 3 | 3   | 15 |
| 407 | 3 | 5 | 5 | 3 | 3 | 3   | 15 |
| 407 | 5 | 5 | 3 | 4 | 3 | 4.5 | 15 |
| 407 | 5 | 5 | 5 | 4 | 3 | 3.5 | 25 |
| 407 | 5 | 3 | 3 | 2 | 7 | 1.5 | 15 |
| 408 | 7 | 7 | 6 | 6 | 1 | 5.5 | 42 |
| 408 | 7 | 5 | 2 | 4 | 6 | 4.5 | 14 |
| 408 | 7 | 1 | 1 | 3 | 7 | 4.5 | 7  |
| 408 | 4 | 5 | 7 | 6 | 3 | 4.5 | 28 |
| 408 | 4 | 7 | 7 | 6 | 2 | 4.5 | 28 |
| 408 | 4 | 7 | 4 | 1 | 4 | 4.5 | 16 |
| 408 | 7 | 6 | 4 | 3 | 4 | 5   | 28 |
| 408 | 7 | 6 | 4 | 3 | 4 | 6   | 28 |
| 408 | 7 | 6 | 4 | 7 | 2 | 6.5 | 28 |
| 409 | 2 | 6 | 3 | 6 | 3 | 4   | 6  |
| 409 | 2 | 6 | 2 | 6 | 5 | 4   | 4  |
| 409 | 2 | 2 | 2 | 3 | 4 | 4   | 4  |
| 409 | 4 | 2 | 2 | 4 | 5 | 3.5 | 8  |
| 409 | 4 | 2 | 6 | 5 | 4 | 4.5 | 24 |
| 409 | 4 | 2 | 2 | 3 | 3 | 3.5 | 8  |
| 409 | 6 | 2 | 3 | 4 | 4 | 4   | 18 |
| 409 | 6 | 2 | 3 | 2 | 3 | 4   | 18 |
| 409 | 6 | 2 | 3 | 2 | 5 | 4.5 | 18 |
| 410 | 5 | 7 | 6 | 7 | 6 | 5.5 | 30 |
| 410 | 5 | 5 | 1 | 6 | 6 | 5   | 5  |
| 410 | 5 | 2 | 1 | 7 | 7 | 5   | 5  |
| 410 | 6 | 7 | 6 | 6 | 6 | 6   | 36 |
| 410 | 6 | 7 | 7 | 6 | 6 | 6.5 | 42 |
| 410 | 6 | 6 | 1 | 4 | 2 | 5.5 | 6  |
| 410 | 6 | 7 | 1 | 6 | 5 | 5.5 | 6  |

brand extension data

|     |   |   |   |   |   |     |    |
|-----|---|---|---|---|---|-----|----|
| 410 | 6 | 6 | 1 | 3 | 4 | 4.5 | 6  |
| 410 | 6 | 4 | 1 | 2 | 6 | 4   | 6  |
| 411 | 5 | 5 | 2 | 4 | 4 | 1.5 | 10 |
| 411 | 5 | 1 | 1 | 4 | 4 | 2.5 | 5  |
| 411 | 5 | 6 | 1 | 6 | 3 | 5.5 | 5  |
| 411 | 4 | 1 | 7 | 4 | 2 | 5   | 28 |
| 411 | 4 | 1 | 7 | 3 | 5 | 5.5 | 28 |
| 411 | 4 | 7 | 1 | 4 | 1 | 5.5 | 4  |
| 411 | 5 | 3 | 3 | 4 | 2 | 5   | 15 |
| 411 | 5 | 3 | 3 | 3 | 5 | 2.5 | 15 |
| 411 | 5 | 1 | 3 | 4 | 4 | 3   | 15 |
| 412 | 4 | 1 | 2 | 3 | 2 | 1.5 | 8  |
| 412 | 4 | 3 | 2 | 4 | 4 | 2.5 | 8  |
| 412 | 4 | 5 | 1 | 2 | 3 | 3   | 4  |
| 412 | 5 | 2 | 2 | 4 | 5 | 5   | 10 |
| 412 | 5 | 2 | 2 | 5 | 6 | 4.5 | 10 |
| 412 | 5 | 3 | 3 | 3 | 4 | 4   | 15 |
| 412 | 7 | 4 | 3 | 3 | 5 | 4.5 | 21 |
| 412 | 7 | 5 | 4 | 4 | 4 | 4.5 | 28 |
| 412 | 7 | 2 | 4 | 5 | 5 | 4   | 28 |
| 413 | 4 | 6 | 5 | 6 | 2 | 6.5 | 20 |
| 413 | 4 | 2 | 1 | 4 | 4 | 3.5 | 4  |
| 413 | 4 | 1 | 1 | 3 | 5 | 2.5 | 4  |
| 413 | 2 | 5 | 5 | 6 | 6 | 5.5 | 10 |
| 413 | 2 | 5 | 5 | 3 | 5 | 2   | 10 |
| 413 | 2 | 2 | 3 | 4 | 3 | 3.5 | 6  |
| 413 | 5 | 5 | 3 | 6 | 2 | 5.5 | 15 |
| 413 | 5 | 5 | 3 | 6 | 4 | 6   | 15 |
| 413 | 5 | 5 | 3 | 7 | 4 | 6.5 | 15 |
| 414 | 5 | 6 | 1 | 5 | 6 | 4.5 | 5  |
| 414 | 5 | 5 | 1 | 3 | 6 | 4   | 5  |
| 414 | 5 | 4 | 1 | 3 | 6 | 4.5 | 5  |
| 414 | 3 | 4 | 1 | 2 | 6 | 3.5 | 3  |
| 414 | 3 | 6 | 1 | 6 | 6 | 3.5 | 3  |
| 414 | 3 | 2 | 1 | 1 | 6 | 3   | 3  |
| 414 | 4 | 6 | 1 | 2 | 6 | 4   | 4  |
| 414 | 4 | 6 | 1 | 1 | 6 | 4   | 4  |
| 414 | 4 | 6 | 1 | 3 | 6 | 4   | 4  |
| 415 | 5 | 6 | 3 | 5 | 3 | 6   | 15 |
| 415 | 5 | 4 | 2 | 4 | 4 | 4   | 10 |
| 415 | 5 | 4 | 2 | 5 | 5 | 4   | 10 |
| 415 | 3 | 5 | 3 | 5 | 5 | 3   | 9  |
| 415 | 3 | 4 | 6 | 6 | 5 | 4.5 | 18 |
| 415 | 3 | 4 | 3 | 5 | 4 | 2.5 | 9  |
| 415 | 6 | 5 | 2 | 5 | 3 | 4   | 12 |
| 415 | 6 | 6 | 2 | 6 | 3 | 3.5 | 12 |
| 415 | 6 | 5 | 2 | 5 | 4 | 3.5 | 12 |
| 416 | 3 | 6 | 6 | 5 | 4 | 4   | 18 |
| 416 | 3 | 3 | 1 | 2 | 6 | 2   | 3  |
| 416 | 3 | 1 | 1 | 2 | 4 | 2.5 | 3  |
| 416 | 2 | 5 | 3 | 5 | 4 | 3   | 6  |

brand extension data

|     |   |   |   |   |   |     |    |
|-----|---|---|---|---|---|-----|----|
| 416 | 2 | 7 | 6 | 6 | 2 | 4   | 12 |
| 416 | 2 | 1 | 4 | 2 | 4 | 2   | 8  |
| 416 | 5 | 4 | 3 | 3 | 4 | 3   | 15 |
| 416 | 5 | 2 | 2 | 2 | 5 | 2.5 | 10 |
| 416 | 5 | 6 | 2 | 6 | 3 | 3   | 10 |
| 417 | 7 | 1 | 6 | 6 | 3 | 4   | 42 |
| 417 | 7 | 1 | 1 | 4 | 3 | 5   | 7  |
| 417 | 7 | 1 | 1 | 1 | 7 | 3   | 7  |
| 417 | 1 | 1 | 1 | 1 | 7 | 1   | 1  |
| 417 | 1 | 1 | 1 | 1 | 7 | 1   | 1  |
| 417 | 1 | 1 | 1 | 1 | 7 | 1   | 1  |
| 417 | 6 | 1 | 1 | 1 | 5 | 3   | 6  |
| 417 | 6 | 5 | 3 | 1 | 4 | 5   | 18 |
| 417 | 6 | 5 | 1 | 6 | 2 | 5.5 | 6  |
| 418 | 5 | 7 | 5 | 6 | 2 | 4.5 | 25 |
| 418 | 5 | 6 | 1 | 1 | 4 | 4   | 5  |
| 418 | 5 | 1 | 1 | 1 | 1 | 2.5 | 5  |
| 418 | 2 | 7 | 6 | 6 | 6 | 3.5 | 12 |
| 418 | 2 | 7 | 6 | 6 | 6 | 4.5 | 12 |
| 418 | 2 | 5 | 1 | 1 | 1 | 2   | 2  |
| 418 | 6 | 1 | 1 | 1 | 1 | 2.5 | 6  |
| 418 | 6 | 1 | 1 | 1 | 1 | 2.5 | 6  |
| 418 | 6 | 7 | 1 | 6 | 6 | 5   | 6  |
| 419 | 6 | 6 | 4 | 5 | 4 | 5.5 | 24 |
| 419 | 6 | 4 | 4 | 5 | 5 | 4.5 | 24 |
| 419 | 6 | 4 | 3 | 5 | 3 | 4   | 18 |
| 419 | 3 | 4 | 4 | 4 | 4 | 2   | 12 |
| 419 | 3 | 4 | 4 | 4 | 4 | 2   | 12 |
| 419 | 3 | 4 | 5 | 5 | 4 | 4   | 15 |
| 419 | 6 | 5 | 4 | 5 | 5 | 6   | 24 |
| 419 | 6 | 5 | 5 | 5 | 5 | 6   | 30 |
| 419 | 6 | 6 | 4 | 6 | 5 | 6   | 24 |
| 420 | 6 | 6 | 7 | 4 | 4 | 6.5 | 42 |
| 420 | 6 | 5 | 6 | 3 | 4 | 6   | 36 |
| 420 | 3 | 1 | 7 | 5 | 3 | 4   | 21 |
| 420 | 3 | 1 | 6 | 4 | 3 | 4   | 18 |
| 420 | 3 | 4 | 2 | 4 | 3 | 3   | 6  |
| 420 | 4 | 6 | 4 | 5 | 4 | 3.5 | 16 |
| 420 | 4 | 6 | 5 | 4 | 4 | 3   | 20 |
| 420 | 4 | 6 | 7 | 4 | 4 | 2.5 | 28 |
| 421 | 4 | 6 | 6 | 5 | 5 | 4   | 24 |
| 422 | 6 | 7 | 5 | 7 | 1 | 6.5 | 30 |
| 422 | 6 | 7 | 5 | 7 | 2 | 6.5 | 30 |
| 422 | 6 | 5 | 1 | 1 | 5 | 6   | 6  |
| 422 | 7 | 7 | 7 | 6 | 4 | 6.5 | 49 |
| 422 | 7 | 7 | 7 | 6 | 4 | 7   | 49 |
| 422 | 7 | 7 | 7 | 4 | 5 | 3.5 | 49 |
| 423 | 5 | 1 | 1 | 5 | 5 | 4   | 5  |
| 423 | 5 | 6 | 1 | 4 | 5 | 4   | 5  |
| 423 | 5 | 1 | 1 | 3 | 5 | 3.5 | 5  |
| 423 | 6 | 4 | 4 | 4 | 5 | 5   | 24 |

brand extension data

|     |   |   |   |   |   |     |    |
|-----|---|---|---|---|---|-----|----|
| 423 | 6 | 2 | 1 | 5 | 5 | 2   | 6  |
| 423 | 6 | 4 | 1 | 3 | 5 | 4   | 6  |
| 423 | 5 | 1 | 1 | 4 | 5 | 3.5 | 5  |
| 423 | 5 | 3 | 1 | 3 | 5 | 3   | 5  |
| 423 | 5 | 1 | 1 | 4 | 5 | 2.5 | 5  |
| 424 | 2 | 5 | 1 | 1 | 3 | 2   | 2  |
| 424 | 2 | 4 | 1 | 1 | 3 | 3.5 | 2  |
| 424 | 2 | 5 | 1 | 3 | 6 | 3.5 | 2  |
| 424 | 1 | 6 | 7 | 1 | 7 | 3   | 7  |
| 424 | 1 | 4 | 1 | 1 | 7 | 1   | 1  |
| 424 | 1 | 6 | 7 | 2 | 4 | 5.5 | 7  |
| 424 | 4 | 4 | 2 | 4 | 6 | 2   | 8  |
| 424 | 4 | 7 | 3 | 5 | 6 | 2   | 12 |
| 424 | 4 | 4 | 7 | 5 | 6 | 6   | 28 |
| 425 | 4 | 1 | 3 | 3 | 5 | 4   | 12 |
| 425 | 4 | 5 | 4 | 4 | 1 | 4.5 | 16 |
| 425 | 4 | 3 | 2 | 4 | 4 | 4   | 8  |
| 425 | 4 | 1 | 1 | 5 | 6 | 5   | 4  |
| 425 | 4 | 1 | 1 | 4 | 5 | 3   | 4  |
| 425 | 4 | 1 | 7 | 3 | 7 | 4   | 28 |
| 425 | 5 | 4 | 7 | 3 | 6 | 5.5 | 35 |
| 425 | 5 | 1 | 1 | 5 | 4 | 3.5 | 5  |
| 425 | 5 | 1 | 1 | 6 | 6 | 3   | 5  |
| 426 | 3 | 1 | 1 | 3 | 5 | 3.5 | 3  |
| 426 | 3 | 1 | 1 | 1 | 3 | 4.5 | 3  |
| 426 | 3 | 1 | 1 | 2 | 2 | 6   | 3  |
| 426 | 7 | 6 | 6 | 6 | 6 | 5   | 42 |
| 426 | 7 | 1 | 1 | 1 | 3 | 2   | 7  |
| 426 | 7 | 7 | 1 | 7 | 6 | 5.5 | 7  |
| 426 | 6 | 7 | 1 | 7 | 5 | 7   | 6  |
| 426 | 6 | 1 | 1 | 3 | 4 | 2.5 | 6  |
| 426 | 6 | 5 | 1 | 2 | 7 | 4.5 | 6  |
| 427 | 7 | 1 | 1 | 5 | 4 | 2.5 | 7  |
| 427 | 7 | 3 | 6 | 1 | 2 | 4   | 42 |
| 427 | 7 | 1 | 3 | 2 | 3 | 3.5 | 21 |
| 427 | 6 | 2 | 1 | 6 | 5 | 3.5 | 6  |
| 427 | 6 | 3 | 1 | 2 | 2 | 3.5 | 6  |
| 427 | 6 | 1 | 1 | 1 | 3 | 1.5 | 6  |
| 427 | 5 | 6 | 5 | 7 | 5 | 4.5 | 25 |
| 427 | 5 | 2 | 1 | 4 | 1 | 2.5 | 5  |
| 427 | 5 | 1 | 1 | 1 | 1 | 1   | 5  |
| 428 | 5 | 4 | 3 | 4 | 6 | 3.5 | 15 |
| 428 | 5 | 4 | 4 | 3 | 6 | 3   | 20 |
| 428 | 5 | 6 | 6 | 6 | 4 | 6   | 30 |
| 428 | 5 | 6 | 5 | 5 | 4 | 5   | 25 |
| 428 | 5 | 5 | 1 | 2 | 5 | 3.5 | 5  |
| 428 | 5 | 7 | 5 | 6 | 5 | 5.5 | 25 |
| 428 | 5 | 6 | 6 | 5 | 4 | 5   | 30 |
| 428 | 5 | 5 | 5 | 4 | 3 | 5.5 | 25 |
| 428 | 5 | 3 | 2 | 3 | 3 | 2   | 10 |
| 430 | 4 | 1 | 1 | 3 | 4 | 2   | 4  |

brand extension data

|     |   |   |   |   |   |     |    |
|-----|---|---|---|---|---|-----|----|
| 430 | 4 | 5 | 4 | 2 | 4 | 5   | 16 |
| 430 | 4 | 5 | 6 | 4 | 6 | 6.5 | 24 |
| 430 | 4 | 5 | 1 | 2 | 5 | 3   | 4  |
| 430 | 4 | 3 | 1 | 1 | 6 | 4.5 | 4  |
| 430 | 4 | 2 | 1 | 2 | 4 | 1   | 4  |
| 430 | 5 | 6 | 3 | 6 | 4 | 3.5 | 15 |
| 430 | 5 | 6 | 3 | 5 | 4 | 5.5 | 15 |
| 430 | 5 | 1 | 1 | 2 | 5 | 3   | 5  |
| 431 | 7 | 1 | 1 | 3 | 5 | 2.5 | 7  |
| 431 | 7 | 1 | 1 | 3 | 3 | 2   | 7  |
| 431 | 7 | 3 | 6 | 5 | 3 | 5.5 | 42 |
| 431 | 5 | 5 | 1 | 3 | 5 | 4   | 5  |
| 431 | 5 | 4 | 1 | 1 | 7 | 2   | 5  |
| 431 | 5 | 3 | 2 | 4 | 7 | 1.5 | 10 |
| 431 | 4 | 7 | 5 | 6 | 3 | 5   | 20 |
| 431 | 4 | 6 | 5 | 4 | 3 | 5   | 20 |
| 431 | 4 | 3 | 1 | 3 | 3 | 1.5 | 4  |
| 432 | 7 | 5 | 1 | 3 | 6 | 2.5 | 7  |
| 432 | 7 | 1 | 1 | 1 | 5 | 1   | 7  |
| 432 | 7 | 7 | 7 | 4 | 6 | 6   | 49 |
| 432 | 6 | 3 | 1 | 1 | 4 | 4   | 6  |
| 432 | 6 | 1 | 1 | 1 | 4 | 1.5 | 6  |
| 432 | 6 | 1 | 1 | 1 | 6 | 1   | 6  |
| 432 | 7 | 7 | 7 | 7 | 6 | 7   | 49 |
| 432 | 7 | 7 | 1 | 7 | 6 | 5.5 | 7  |
| 432 | 7 | 5 | 1 | 5 | 6 | 3   | 7  |
| 433 | 5 | 2 | 2 | 2 | 4 | 3.5 | 10 |
| 433 | 5 | 1 | 1 | 2 | 2 | 2   | 5  |
| 433 | 5 | 4 | 4 | 5 | 6 | 3.5 | 20 |
| 433 | 2 | 3 | 1 | 3 | 5 | 1   | 2  |
| 433 | 2 | 2 | 1 | 2 | 2 | 1.5 | 2  |
| 433 | 2 | 2 | 1 | 1 | 5 | 1   | 2  |
| 433 | 5 | 6 | 2 | 6 | 4 | 5   | 10 |
| 433 | 5 | 4 | 1 | 4 | 4 | 4   | 5  |
| 433 | 5 | 1 | 1 | 2 | 3 | 1   | 5  |
| 434 | 6 | 5 | 4 | 4 | 3 | 4.5 | 24 |
| 434 | 6 | 5 | 6 | 4 | 3 | 4.5 | 36 |
| 434 | 6 | 3 | 4 | 5 | 3 | 4.5 | 24 |
| 434 | 5 | 4 | 3 | 4 | 5 | 4.5 | 15 |
| 434 | 5 | 2 | 2 | 5 | 4 | 5.5 | 10 |
| 434 | 5 | 2 | 2 | 5 | 4 | 4.5 | 10 |
| 434 | 3 | 6 | 5 | 3 | 4 | 4.5 | 15 |
| 434 | 3 | 4 | 3 | 3 | 4 | 3   | 9  |
| 434 | 3 | 4 | 3 | 3 | 4 | 3   | 9  |
| 435 | 5 | 1 | 2 | 4 | 2 | 2   | 10 |
| 435 | 5 | 4 | 2 | 2 | 2 | 2   | 10 |
| 435 | 5 | 3 | 5 | 2 | 2 | 2.5 | 25 |
| 435 | 5 | 4 | 3 | 4 | 3 | 1   | 15 |
| 435 | 5 | 2 | 3 | 2 | 4 | 1.5 | 15 |
| 435 | 5 | 3 | 4 | 2 | 5 | 2   | 20 |
| 435 | 2 | 5 | 5 | 5 | 3 | 1.5 | 10 |

brand extension data

|     |   |   |   |   |   |     |    |
|-----|---|---|---|---|---|-----|----|
| 435 | 2 | 1 | 2 | 1 | 4 | 2   | 4  |
| 435 | 2 | 3 | 2 | 4 | 2 | 3   | 4  |
| 436 | 5 | 5 | 5 | 3 | 3 | 4.5 | 25 |
| 436 | 5 | 4 | 4 | 2 | 2 | 3.5 | 20 |
| 436 | 5 | 2 | 4 | 2 | 3 | 4.5 | 20 |
| 436 | 6 | 5 | 5 | 6 | 6 | 5.5 | 30 |
| 436 | 6 | 5 | 4 | 5 | 4 | 5.5 | 24 |
| 436 | 6 | 3 | 4 | 3 | 4 | 4   | 24 |
| 436 | 4 | 5 | 5 | 6 | 5 | 4.5 | 20 |
| 436 | 4 | 4 | 6 | 6 | 2 | 4.5 | 24 |
| 436 | 4 | 5 | 6 | 5 | 4 | 4   | 24 |
| 437 | 7 | 2 | 2 | 2 | 2 | 6   | 14 |
| 437 | 7 | 5 | 2 | 1 | 2 | 4.5 | 14 |
| 437 | 7 | 6 | 6 | 6 | 5 | 6   | 42 |
| 437 | 6 | 6 | 3 | 4 | 6 | 6   | 18 |
| 437 | 6 | 3 | 3 | 1 | 4 | 5   | 18 |
| 437 | 6 | 6 | 3 | 4 | 7 | 4.5 | 18 |
| 437 | 6 | 6 | 6 | 6 | 5 | 6   | 36 |
| 437 | 6 | 6 | 2 | 3 | 5 | 6.5 | 12 |
| 437 | 6 | 3 | 2 | 4 | 5 | 5   | 12 |
| 438 | 4 | 1 | 1 | 7 | 2 | 7   | 4  |
| 438 | 4 | 1 | 1 | 1 | 1 | 2   | 4  |
| 438 | 4 | 4 | 7 | 6 | 2 | 7   | 28 |
| 438 | 5 | 7 | 1 | 6 | 6 | 6   | 5  |
| 438 | 5 | 2 | 1 | 2 | 3 | 2   | 5  |
| 438 | 5 | 2 | 1 | 5 | 5 | 2   | 5  |
| 438 | 7 | 7 | 7 | 7 | 5 | 7   | 49 |
| 438 | 7 | 7 | 7 | 6 | 5 | 6   | 49 |
| 438 | 7 | 3 | 1 | 5 | 5 | 3.5 | 7  |
| 439 | 4 | 2 | 3 | 4 | 4 | 3.5 | 12 |
| 439 | 4 | 1 | 1 | 2 | 2 | 3   | 4  |
| 439 | 4 | 4 | 6 | 5 | 5 | 4.5 | 24 |
| 439 | 6 | 5 | 7 | 5 | 6 | 5   | 42 |
| 439 | 6 | 2 | 2 | 3 | 4 | 3.5 | 12 |
| 439 | 6 | 6 | 5 | 4 | 7 | 5.5 | 30 |
| 439 | 6 | 7 | 7 | 6 | 7 | 6.5 | 42 |
| 439 | 6 | 4 | 4 | 6 | 5 | 4   | 24 |
| 439 | 6 | 5 | 4 | 5 | 5 | 5   | 24 |
| 440 | 7 | 1 | 1 | 5 | 3 | 4   | 7  |
| 440 | 7 | 1 | 1 | 6 | 2 | 5   | 7  |
| 440 | 7 | 4 | 5 | 5 | 3 | 7   | 35 |
| 440 | 6 | 2 | 1 | 6 | 5 | 4   | 6  |
| 440 | 6 | 2 | 2 | 7 | 4 | 3   | 12 |
| 440 | 6 | 2 | 2 | 7 | 4 | 3   | 12 |
| 440 | 7 | 2 | 3 | 6 | 6 | 5.5 | 21 |
| 440 | 7 | 1 | 3 | 7 | 3 | 4.5 | 21 |
| 440 | 7 | 1 | 1 | 7 | 3 | 3   | 7  |
| 441 | 4 | 7 | 3 | 5 | 2 | 4.5 | 12 |
| 441 | 4 | 6 | 2 | 5 | 2 | 3.5 | 8  |
| 441 | 4 | 5 | 7 | 5 | 3 | 5   | 28 |
| 441 | 4 | 7 | 7 | 4 | 3 | 4   | 28 |

brand extension data

|     |   |   |   |   |   |     |    |
|-----|---|---|---|---|---|-----|----|
| 441 | 4 | 6 | 3 | 5 | 4 | 5   | 12 |
| 441 | 4 | 5 | 7 | 6 | 3 | 4.5 | 28 |
| 441 | 5 | 7 | 7 | 4 | 4 | 5   | 35 |
| 441 | 5 | 3 | 7 | 4 | 3 | 4.5 | 35 |
| 441 | 5 | 7 | 1 | 4 | 3 | 5.5 | 5  |
| 442 | 5 | 3 | 3 | 3 | 4 | 2.5 | 15 |
| 442 | 5 | 5 | 5 | 4 | 3 | 4.5 | 25 |
| 442 | 5 | 6 | 6 | 6 | 5 | 5   | 30 |
| 442 | 3 | 4 | 2 | 4 | 6 | 5   | 6  |
| 442 | 3 | 5 | 4 | 3 | 3 | 4.5 | 12 |
| 442 | 3 | 2 | 6 | 6 | 4 | 5   | 18 |
| 442 | 6 | 2 | 3 | 5 | 1 | 4   | 18 |
| 442 | 6 | 4 | 5 | 3 | 5 | 4   | 30 |
| 442 | 6 | 6 | 7 | 6 | 6 | 4.5 | 42 |
| 443 | 3 | 7 | 1 | 2 | 2 | 2   | 3  |
| 443 | 3 | 2 | 1 | 3 | 1 | 2   | 3  |
| 443 | 3 | 7 | 1 | 4 | 3 | 5   | 3  |
| 443 | 4 | 7 | 2 | 3 | 5 | 4.5 | 8  |
| 443 | 4 | 4 | 1 | 3 | 6 | 4.5 | 4  |
| 443 | 4 | 6 | 3 | 3 | 7 | 4.5 | 12 |
| 443 | 3 | 7 | 7 | 4 | 6 | 5   | 21 |
| 443 | 3 | 6 | 3 | 5 | 3 | 3   | 9  |
| 443 | 3 | 5 | 1 | 4 | 5 | 2   | 3  |
| 444 | 5 | 2 | 2 | 3 | 3 | 4.5 | 10 |
| 444 | 5 | 2 | 3 | 5 | 3 | 4.5 | 15 |
| 444 | 5 | 2 | 2 | 4 | 4 | 5   | 10 |
| 444 | 3 | 3 | 2 | 3 | 4 | 3.5 | 6  |
| 444 | 3 | 2 | 1 | 2 | 6 | 2   | 3  |
| 444 | 3 | 3 | 1 | 3 | 6 | 1.5 | 3  |
| 444 | 4 | 6 | 3 | 4 | 4 | 4.5 | 12 |
| 444 | 4 | 6 | 2 | 3 | 3 | 4.5 | 8  |
| 444 | 4 | 5 | 3 | 3 | 3 | 4   | 12 |
| 445 | 5 | 2 | 4 | 4 | 4 | 3   | 20 |
| 445 | 5 | 3 | 3 | 5 | 3 | 3.5 | 15 |
| 445 | 5 | 4 | 2 | 5 | 4 | 3.5 | 10 |
| 445 | 5 | 4 | 4 | 5 | 2 | 4   | 20 |
| 445 | 5 | 2 | 2 | 4 | 4 | 2   | 10 |
| 445 | 5 | 1 | 1 | 5 | 5 | 1   | 5  |
| 445 | 5 | 5 | 5 | 5 | 2 | 5.5 | 25 |
| 445 | 5 | 4 | 4 | 3 | 5 | 3.5 | 20 |
| 445 | 5 | 3 | 3 | 4 | 4 | 2.5 | 15 |
| 446 | 7 | 1 | 3 | 5 | 5 | 5   | 21 |
| 446 | 7 | 5 | 6 | 5 | 3 | 5.5 | 42 |
| 446 | 7 | 5 | 6 | 6 | 4 | 6   | 42 |
| 446 | 7 | 1 | 1 | 5 | 4 | 4   | 7  |
| 446 | 7 | 1 | 1 | 1 | 2 | 3   | 7  |
| 446 | 7 | 1 | 1 | 5 | 6 | 4   | 7  |
| 446 | 7 | 7 | 7 | 7 | 5 | 6   | 49 |
| 446 | 7 | 6 | 6 | 5 | 5 | 5   | 42 |
| 446 | 7 | 1 | 1 | 3 | 4 | 3   | 7  |
| 447 | 3 | 1 | 1 | 1 | 7 | 4   | 3  |

brand extension data

|     |   |   |   |   |   |     |    |
|-----|---|---|---|---|---|-----|----|
| 447 | 3 | 1 | 1 | 1 | 3 | 4   | 3  |
| 447 | 3 | 4 | 6 | 2 | 4 | 4.5 | 18 |
| 447 | 3 | 4 | 1 | 5 | 6 | 3.5 | 3  |
| 447 | 3 | 1 | 1 | 1 | 5 | 4   | 3  |
| 447 | 3 | 1 | 1 | 6 | 3 | 4   | 3  |
| 447 | 3 | 1 | 1 | 6 | 6 | 4.5 | 3  |
| 447 | 3 | 5 | 1 | 1 | 3 | 4   | 3  |
| 447 | 3 | 2 | 1 | 1 | 1 | 5   | 3  |
| 448 | 5 | 1 | 4 | 6 | 3 | 2   | 20 |
| 448 | 5 | 1 | 2 | 4 | 5 | 2   | 10 |
| 448 | 5 | 1 | 1 | 2 | 2 | 3.5 | 5  |
| 448 | 6 | 6 | 2 | 3 | 5 | 5.5 | 12 |
| 448 | 6 | 5 | 2 | 3 | 3 | 4   | 12 |
| 448 | 6 | 6 | 2 | 3 | 4 | 5.5 | 12 |
| 448 | 6 | 4 | 1 | 4 | 5 | 5.5 | 6  |
| 448 | 6 | 5 | 4 | 5 | 2 | 5.5 | 24 |
| 448 | 6 | 6 | 5 | 5 | 2 | 5   | 30 |
| 448 | 6 | 6 | 5 | 5 | 4 | 6   | 30 |
| 448 | 6 | 6 | 2 | 4 | 4 | 6   | 12 |
| 448 | 6 | 6 | 2 | 2 | 2 | 5   | 12 |
| 448 | 6 | 4 | 5 | 6 | 4 | 6.5 | 30 |
| 448 | 5 | 6 | 2 | 7 | 6 | 4   | 10 |
| 448 | 5 | 6 | 1 | 3 | 5 | 4   | 5  |
| 448 | 5 | 6 | 5 | 4 | 4 | 4.5 | 25 |
| 448 | 3 | 4 | 5 | 6 | 1 | 2.5 | 15 |
| 448 | 3 | 4 | 2 | 5 | 7 | 4   | 6  |
| 448 | 3 | 4 | 2 | 4 | 6 | 2   | 6  |
| 449 | 5 | 5 | 7 | 7 | 4 | 6   | 35 |
| 449 | 5 | 6 | 5 | 2 | 5 | 1.5 | 25 |
| 449 | 5 | 3 | 1 | 1 | 1 | 3   | 5  |
| 449 | 5 | 7 | 1 | 1 | 6 | 3   | 5  |
| 449 | 5 | 3 | 1 | 2 | 5 | 5.5 | 5  |
| 449 | 5 | 4 | 2 | 1 | 3 | 3.5 | 10 |
| 449 | 5 | 4 | 2 | 2 | 5 | 5   | 10 |
| 449 | 7 | 2 | 5 | 1 | 1 | 4.5 | 35 |
| 449 | 7 | 3 | 6 | 4 | 1 | 7   | 42 |
| 449 | 7 | 4 | 5 | 4 | 3 | 7   | 35 |
| 449 | 7 | 6 | 2 | 1 | 3 | 7   | 14 |
| 449 | 7 | 7 | 1 | 1 | 1 | 7   | 7  |
| 449 | 7 | 3 | 4 | 4 | 5 | 6   | 28 |
| 449 | 7 | 1 | 2 | 6 | 7 | 7   | 14 |
| 449 | 7 | 1 | 3 | 2 | 6 | 6   | 21 |
| 449 | 7 | 3 | 5 | 3 | 3 | 7   | 35 |
| 449 | 3 | 5 | 4 | 7 | 1 | 4   | 12 |
| 449 | 3 | 1 | 1 | 1 | 6 | 2.5 | 3  |
| 449 | 3 | 1 | 1 | 1 | 4 | 5   | 3  |
| 450 | 6 | 5 | 5 | 6 | 4 | 5   | 30 |
| 450 | 6 | 2 | 4 | 4 | 4 | 1.5 | 24 |
| 450 | 6 | 5 | 1 | 3 | 4 | 3   | 6  |
| 450 | 5 | 5 | 2 | 3 | 4 | 2.5 | 10 |
| 450 | 5 | 5 | 2 | 3 | 4 | 5   | 10 |

brand extension data

|     |   |   |   |   |   |     |    |
|-----|---|---|---|---|---|-----|----|
| 450 | 5 | 5 | 2 | 3 | 4 | 3.5 | 10 |
| 450 | 5 | 5 | 2 | 3 | 4 | 5   | 10 |
| 450 | 6 | 2 | 2 | 3 | 4 | 5   | 12 |
| 450 | 6 | 2 | 4 | 5 | 4 | 4.5 | 24 |
| 450 | 6 | 5 | 4 | 3 | 4 | 5   | 24 |
| 450 | 6 | 5 | 2 | 3 | 4 | 5   | 12 |
| 450 | 6 | 5 | 2 | 3 | 4 | 5   | 12 |
| 450 | 6 | 2 | 4 | 5 | 4 | 5.5 | 24 |
| 450 | 6 | 2 | 2 | 3 | 5 | 5.5 | 12 |
| 450 | 6 | 5 | 2 | 3 | 5 | 5   | 12 |
| 450 | 6 | 2 | 2 | 3 | 4 | 5.5 | 12 |
| 450 | 5 | 2 | 4 | 5 | 4 | 4   | 20 |
| 450 | 5 | 5 | 2 | 2 | 4 | 4.5 | 10 |
| 450 | 5 | 5 | 2 | 2 | 4 | 5   | 10 |
| 451 | 5 | 7 | 7 | 7 | 4 | 3   | 35 |
| 451 | 5 | 7 | 4 | 3 | 4 | 1.5 | 20 |
| 451 | 5 | 2 | 2 | 2 | 2 | 3.5 | 10 |
| 451 | 6 | 7 | 1 | 1 | 5 | 3.5 | 6  |
| 451 | 6 | 2 | 1 | 1 | 2 | 2.5 | 6  |
| 451 | 6 | 5 | 1 | 2 | 3 | 3.5 | 6  |
| 451 | 6 | 7 | 1 | 1 | 6 | 5.5 | 6  |
| 451 | 7 | 7 | 3 | 2 | 2 | 6   | 21 |
| 451 | 7 | 5 | 7 | 3 | 1 | 4   | 49 |
| 451 | 7 | 2 | 5 | 4 | 3 | 4   | 35 |
| 451 | 7 | 6 | 3 | 1 | 3 | 5   | 21 |
| 451 | 7 | 7 | 4 | 1 | 2 | 3.5 | 28 |
| 451 | 7 | 1 | 5 | 3 | 5 | 3.5 | 35 |
| 451 | 7 | 5 | 1 | 6 | 7 | 7   | 7  |
| 451 | 7 | 1 | 1 | 1 | 7 | 3.5 | 7  |
| 451 | 7 | 3 | 4 | 4 | 6 | 6.5 | 28 |
| 451 | 7 | 1 | 5 | 5 | 1 | 4   | 35 |
| 451 | 7 | 5 | 1 | 4 | 7 | 2   | 7  |
| 451 | 7 | 1 | 1 | 1 | 6 | 3   | 7  |
| 452 | 5 | 7 | 1 | 7 | 2 | 4.5 | 5  |
| 452 | 5 | 6 | 2 | 5 | 4 | 3   | 10 |
| 452 | 5 | 7 | 1 | 2 | 1 | 3   | 5  |
| 452 | 5 | 7 | 1 | 2 | 6 | 3.5 | 5  |
| 452 | 5 | 5 | 1 | 2 | 6 | 4.5 | 5  |
| 452 | 5 | 7 | 1 | 4 | 4 | 4   | 5  |
| 452 | 5 | 5 | 1 | 5 | 7 | 4   | 5  |
| 452 | 7 | 3 | 1 | 3 | 1 | 4.5 | 7  |
| 452 | 7 | 6 | 4 | 5 | 1 | 4   | 28 |
| 452 | 7 | 7 | 5 | 6 | 3 | 6   | 35 |
| 452 | 7 | 7 | 6 | 4 | 6 | 6   | 42 |
| 452 | 7 | 7 | 5 | 3 | 2 | 3   | 35 |
| 452 | 7 | 5 | 6 | 6 | 4 | 6   | 42 |
| 452 | 7 | 7 | 7 | 7 | 7 | 6   | 49 |
| 452 | 7 | 7 | 7 | 5 | 7 | 5   | 49 |
| 452 | 7 | 5 | 3 | 4 | 5 | 4.5 | 21 |
| 452 | 5 | 7 | 7 | 7 | 3 | 4.5 | 35 |
| 452 | 5 | 5 | 2 | 1 | 6 | 3   | 10 |

brand extension data

|     |   |   |   |   |   |     |    |
|-----|---|---|---|---|---|-----|----|
| 452 | 5 | 1 | 1 | 1 | 7 | 1   | 5  |
| 453 | 3 | 6 | 5 | 7 | 4 | 2   | 15 |
| 453 | 3 | 1 | 5 | 4 | 5 | 2   | 15 |
| 453 | 3 | 1 | 1 | 1 | 1 | 1.5 | 3  |
| 453 | 7 | 7 | 1 | 1 | 6 | 5.5 | 7  |
| 453 | 7 | 7 | 1 | 1 | 6 | 6.5 | 7  |
| 453 | 7 | 7 | 1 | 1 | 5 | 5   | 7  |
| 453 | 7 | 7 | 1 | 1 | 7 | 6   | 7  |
| 453 | 6 | 3 | 6 | 1 | 1 | 6.5 | 36 |
| 453 | 6 | 3 | 3 | 3 | 3 | 6.5 | 18 |
| 453 | 6 | 2 | 2 | 3 | 4 | 4.5 | 12 |
| 453 | 7 | 7 | 2 | 1 | 2 | 7   | 14 |
| 453 | 7 | 1 | 1 | 1 | 5 | 5.5 | 7  |
| 453 | 7 | 1 | 2 | 3 | 6 | 6   | 14 |
| 453 | 6 | 1 | 3 | 4 | 6 | 5   | 18 |
| 453 | 6 | 1 | 2 | 2 | 6 | 5.5 | 12 |
| 453 | 6 | 1 | 5 | 2 | 5 | 5   | 30 |
| 453 | 4 | 7 | 4 | 2 | 4 | 3   | 16 |
| 453 | 4 | 7 | 2 | 2 | 6 | 4   | 8  |
| 453 | 4 | 1 | 2 | 2 | 6 | 4   | 8  |
| 454 | 7 | 7 | 6 | 7 | 5 | 2   | 42 |
| 454 | 7 | 1 | 1 | 5 | 7 | 1.5 | 7  |
| 454 | 7 | 1 | 1 | 1 | 2 | 4   | 7  |
| 454 | 7 | 7 | 1 | 1 | 6 | 6.5 | 7  |
| 454 | 7 | 7 | 1 | 1 | 5 | 6.5 | 7  |
| 454 | 7 | 7 | 1 | 1 | 2 | 7   | 7  |
| 454 | 7 | 7 | 1 | 2 | 7 | 7   | 7  |
| 454 | 7 | 1 | 6 | 4 | 2 | 6.5 | 42 |
| 454 | 7 | 1 | 7 | 6 | 2 | 6.5 | 49 |
| 454 | 7 | 6 | 6 | 4 | 4 | 7   | 42 |
| 454 | 7 | 7 | 1 | 1 | 6 | 7   | 7  |
| 454 | 7 | 6 | 1 | 1 | 2 | 7   | 7  |
| 454 | 7 | 1 | 1 | 7 | 6 | 6.5 | 7  |
| 454 | 7 | 1 | 1 | 7 | 6 | 7   | 7  |
| 454 | 7 | 1 | 1 | 6 | 7 | 7   | 7  |
| 454 | 7 | 1 | 6 | 6 | 6 | 6.5 | 42 |
| 454 | 1 | 7 | 7 | 1 | 1 | 1.5 | 7  |
| 454 | 1 | 6 | 1 | 7 | 7 | 1   | 1  |
| 454 | 1 | 1 | 1 | 4 | 6 | 2.5 | 1  |
| 455 | 4 | 7 | 7 | 7 | 4 | 1.5 | 28 |
| 455 | 4 | 1 | 1 | 1 | 7 | 1   | 4  |
| 455 | 4 | 6 | 3 | 1 | 2 | 1.5 | 12 |
| 455 | 7 | 7 | 1 | 1 | 5 | 4   | 7  |
| 455 | 7 | 6 | 1 | 1 | 4 | 3.5 | 7  |
| 455 | 7 | 6 | 1 | 3 | 4 | 4   | 7  |
| 455 | 7 | 6 | 1 | 3 | 5 | 5   | 7  |
| 455 | 7 | 4 | 1 | 1 | 2 | 1.5 | 7  |
| 455 | 7 | 5 | 2 | 1 | 2 | 3   | 14 |
| 455 | 7 | 6 | 3 | 2 | 3 | 5   | 21 |
| 455 | 6 | 7 | 3 | 2 | 3 | 4.5 | 18 |
| 455 | 6 | 6 | 3 | 3 | 3 | 1   | 18 |

brand extension data

|     |   |   |   |   |   |     |    |
|-----|---|---|---|---|---|-----|----|
| 455 | 6 | 5 | 3 | 1 | 5 | 4.5 | 18 |
| 455 | 6 | 1 | 1 | 3 | 5 | 4.5 | 6  |
| 455 | 6 | 6 | 2 | 1 | 5 | 1.5 | 12 |
| 455 | 6 | 1 | 2 | 1 | 5 | 4   | 12 |
| 455 | 3 | 1 | 3 | 2 | 2 | 2   | 9  |
| 455 | 3 | 3 | 1 | 1 | 4 | 1.5 | 3  |
| 455 | 3 | 1 | 1 | 1 | 4 | 1.5 | 3  |
| 456 | 3 | 1 | 4 | 7 | 4 | 3   | 12 |
| 456 | 3 | 1 | 2 | 5 | 6 | 1.5 | 6  |
| 456 | 3 | 1 | 1 | 1 | 1 | 2   | 3  |
| 456 | 7 | 7 | 1 | 1 | 6 | 7   | 7  |
| 456 | 7 | 5 | 1 | 1 | 3 | 3   | 7  |
| 456 | 7 | 7 | 1 | 4 | 3 | 6   | 7  |
| 456 | 7 | 7 | 1 | 4 | 3 | 6.5 | 7  |
| 456 | 3 | 3 | 1 | 1 | 1 | 1.5 | 3  |
| 456 | 3 | 2 | 1 | 6 | 2 | 1   | 3  |
| 456 | 3 | 2 | 3 | 6 | 2 | 3.5 | 9  |
| 456 | 6 | 2 | 1 | 1 | 3 | 1   | 6  |
| 456 | 6 | 7 | 1 | 1 | 2 | 2.5 | 6  |
| 456 | 6 | 2 | 3 | 6 | 5 | 4   | 18 |
| 456 | 6 | 1 | 1 | 6 | 6 | 6   | 6  |
| 456 | 6 | 7 | 1 | 2 | 6 | 4.5 | 6  |
| 456 | 6 | 1 | 2 | 4 | 3 | 5   | 12 |
| 456 | 3 | 3 | 4 | 4 | 2 | 2.5 | 12 |
| 456 | 3 | 3 | 1 | 5 | 6 | 3   | 3  |
| 456 | 3 | 1 | 1 | 2 | 4 | 1.5 | 3  |
| 457 | 2 | 1 | 2 | 5 | 4 | 1.5 | 4  |
| 457 | 2 | 4 | 4 | 2 | 5 | 1   | 8  |
| 457 | 2 | 6 | 3 | 2 | 2 | 3   | 6  |
| 457 | 6 | 6 | 1 | 1 | 6 | 3   | 6  |
| 457 | 6 | 5 | 2 | 1 | 4 | 5.5 | 12 |
| 457 | 6 | 5 | 3 | 1 | 3 | 2   | 18 |
| 457 | 6 | 6 | 4 | 1 | 5 | 5   | 24 |
| 457 | 5 | 6 | 4 | 3 | 2 | 5.5 | 20 |
| 457 | 5 | 4 | 6 | 2 | 2 | 4   | 30 |
| 457 | 5 | 6 | 6 | 3 | 3 | 5   | 30 |
| 457 | 7 | 5 | 3 | 1 | 3 | 5   | 21 |
| 457 | 7 | 2 | 2 | 1 | 2 | 4.5 | 14 |
| 457 | 7 | 5 | 6 | 5 | 6 | 6   | 42 |
| 457 | 5 | 3 | 6 | 5 | 6 | 6   | 30 |
| 457 | 5 | 5 | 2 | 2 | 7 | 5   | 10 |
| 457 | 5 | 2 | 5 | 2 | 4 | 3   | 25 |
| 457 | 3 | 6 | 5 | 5 | 3 | 7   | 15 |
| 457 | 3 | 2 | 2 | 1 | 6 | 2.5 | 6  |
| 457 | 3 | 1 | 1 | 1 | 3 | 2   | 3  |
| 458 | 5 | 2 | 5 | 6 | 5 | 5.5 | 25 |
| 458 | 5 | 2 | 5 | 3 | 6 | 3   | 25 |
| 458 | 5 | 5 | 3 | 3 | 2 | 3   | 15 |
| 458 | 5 | 5 | 3 | 3 | 6 | 5.5 | 15 |
| 458 | 5 | 2 | 3 | 4 | 5 | 5.5 | 15 |
| 458 | 5 | 5 | 3 | 5 | 5 | 6   | 15 |

brand extension data

|     |   |   |   |   |   |     |    |
|-----|---|---|---|---|---|-----|----|
| 458 | 5 | 5 | 5 | 4 | 5 | 5.5 | 25 |
| 458 | 7 | 5 | 5 | 2 | 2 | 5.5 | 35 |
| 458 | 7 | 2 | 7 | 4 | 3 | 7   | 49 |
| 458 | 7 | 2 | 7 | 5 | 4 | 5   | 49 |
| 458 | 7 | 5 | 3 | 2 | 3 | 5   | 21 |
| 458 | 7 | 5 | 3 | 2 | 4 | 3.5 | 21 |
| 458 | 7 | 2 | 6 | 5 | 5 | 4.5 | 42 |
| 458 | 7 | 2 | 3 | 5 | 7 | 6.5 | 21 |
| 458 | 7 | 2 | 3 | 2 | 6 | 5   | 21 |
| 458 | 7 | 2 | 3 | 2 | 5 | 4.5 | 21 |
| 458 | 3 | 5 | 3 | 5 | 4 | 4.5 | 9  |
| 458 | 3 | 4 | 2 | 2 | 3 | 4.5 | 6  |
| 458 | 3 | 2 | 2 | 2 | 6 | 2.5 | 6  |
| 459 | 5 | 6 | 6 | 6 | 6 | 5   | 30 |
| 459 | 5 | 2 | 2 | 5 | 6 | 1   | 10 |
| 459 | 5 | 2 | 3 | 2 | 2 | 3   | 15 |
| 459 | 5 | 7 | 2 | 1 | 5 | 4   | 10 |
| 459 | 5 | 6 | 2 | 2 | 4 | 3   | 10 |
| 459 | 5 | 7 | 5 | 3 | 3 | 5   | 25 |
| 459 | 5 | 7 | 1 | 3 | 5 | 4.5 | 5  |
| 459 | 6 | 4 | 5 | 2 | 2 | 3   | 30 |
| 459 | 6 | 2 | 6 | 5 | 2 | 3   | 36 |
| 459 | 6 | 7 | 7 | 5 | 5 | 6.5 | 42 |
| 459 | 6 | 7 | 2 | 4 | 3 | 6.5 | 12 |
| 459 | 6 | 7 | 5 | 3 | 5 | 6   | 30 |
| 459 | 6 | 2 | 5 | 4 | 6 | 4   | 30 |
| 459 | 7 | 1 | 3 | 5 | 6 | 6   | 21 |
| 459 | 7 | 6 | 3 | 6 | 6 | 6   | 21 |
| 459 | 7 | 3 | 5 | 3 | 5 | 5.5 | 35 |
| 459 | 4 | 7 | 5 | 6 | 3 | 2   | 20 |
| 459 | 4 | 7 | 6 | 4 | 7 | 6   | 24 |
| 459 | 4 | 4 | 2 | 4 | 6 | 4   | 8  |
| 460 | 6 | 5 | 6 | 7 | 5 | 3.5 | 36 |
| 460 | 6 | 5 | 3 | 1 | 7 | 4   | 18 |
| 460 | 6 | 1 | 1 | 2 | 1 | 2.5 | 6  |
| 460 | 7 | 7 | 1 | 1 | 4 | 4   | 7  |
| 460 | 7 | 7 | 1 | 1 | 3 | 6   | 7  |
| 460 | 7 | 6 | 3 | 1 | 4 | 6   | 21 |
| 460 | 7 | 7 | 3 | 1 | 4 | 5   | 21 |
| 460 | 7 | 5 | 5 | 1 | 1 | 3.5 | 35 |
| 460 | 7 | 4 | 5 | 5 | 5 | 6   | 35 |
| 460 | 7 | 3 | 6 | 5 | 5 | 7   | 42 |
| 460 | 7 | 6 | 1 | 1 | 4 | 5.5 | 7  |
| 460 | 7 | 7 | 1 | 1 | 2 | 5   | 7  |
| 460 | 7 | 3 | 5 | 1 | 6 | 5.5 | 35 |
| 460 | 7 | 1 | 1 | 3 | 6 | 5.5 | 7  |
| 460 | 7 | 7 | 1 | 1 | 5 | 4.5 | 7  |
| 460 | 7 | 1 | 4 | 1 | 3 | 3   | 28 |
| 460 | 2 | 1 | 3 | 5 | 1 | 3.5 | 6  |
| 460 | 2 | 1 | 1 | 1 | 5 | 2.5 | 2  |
| 460 | 2 | 1 | 1 | 1 | 5 | 1   | 2  |

brand extension data

|     |   |   |   |   |   |     |    |
|-----|---|---|---|---|---|-----|----|
| 461 | 4 | 7 | 1 | 7 | 3 | 3   | 4  |
| 461 | 4 | 7 | 1 | 5 | 5 | 4   | 4  |
| 461 | 4 | 7 | 1 | 2 | 1 | 4   | 4  |
| 461 | 6 | 7 | 1 | 2 | 6 | 5   | 6  |
| 461 | 6 | 7 | 1 | 1 | 4 | 5   | 6  |
| 461 | 6 | 7 | 1 | 5 | 2 | 6.5 | 6  |
| 461 | 6 | 7 | 1 | 4 | 3 | 7   | 6  |
| 461 | 7 | 7 | 1 | 5 | 1 | 5   | 7  |
| 461 | 7 | 7 | 4 | 6 | 2 | 6.5 | 28 |
| 461 | 7 | 7 | 4 | 6 | 2 | 7   | 28 |
| 461 | 7 | 7 | 1 | 2 | 3 | 6.5 | 7  |
| 461 | 7 | 7 | 1 | 2 | 2 | 6.5 | 7  |
| 461 | 7 | 3 | 1 | 6 | 5 | 5.5 | 7  |
| 461 | 7 | 1 | 1 | 7 | 7 | 5   | 7  |
| 461 | 7 | 7 | 1 | 4 | 6 | 4   | 7  |
| 461 | 7 | 1 | 1 | 4 | 5 | 4   | 7  |
| 461 | 4 | 1 | 1 | 7 | 3 | 4.5 | 4  |
| 461 | 4 | 7 | 1 | 4 | 6 | 6   | 4  |
| 461 | 4 | 7 | 1 | 2 | 5 | 5   | 4  |
| 462 | 5 | 6 | 5 | 5 | 3 | 2.5 | 25 |
| 462 | 5 | 7 | 3 | 5 | 5 | 2.5 | 15 |
| 462 | 5 | 6 | 2 | 3 | 2 | 2   | 10 |
| 462 | 4 | 5 | 1 | 6 | 6 | 3.5 | 4  |
| 462 | 4 | 5 | 2 | 5 | 3 | 3   | 8  |
| 462 | 4 | 5 | 2 | 5 | 3 | 2   | 8  |
| 462 | 4 | 6 | 2 | 6 | 5 | 3.5 | 8  |
| 462 | 5 | 6 | 3 | 4 | 2 | 4.5 | 15 |
| 462 | 5 | 7 | 6 | 4 | 3 | 6   | 30 |
| 462 | 5 | 7 | 6 | 5 | 3 | 5.5 | 30 |
| 462 | 6 | 7 | 5 | 7 | 5 | 6   | 30 |
| 462 | 6 | 7 | 5 | 6 | 6 | 5   | 30 |
| 462 | 6 | 7 | 6 | 7 | 5 | 6   | 36 |
| 462 | 6 | 5 | 3 | 6 | 5 | 4   | 18 |
| 462 | 6 | 6 | 2 | 6 | 5 | 4   | 12 |
| 462 | 6 | 6 | 2 | 5 | 4 | 4.5 | 12 |
| 462 | 2 | 2 | 6 | 3 | 2 | 2.5 | 12 |
| 462 | 2 | 2 | 5 | 3 | 3 | 2   | 10 |
| 462 | 2 | 2 | 1 | 2 | 4 | 1.5 | 2  |
| 463 | 3 | 6 | 5 | 6 | 3 | 3.5 | 15 |
| 463 | 3 | 3 | 1 | 2 | 4 | 1   | 3  |
| 463 | 3 | 6 | 3 | 1 | 1 | 1.5 | 9  |
| 463 | 4 | 7 | 5 | 1 | 6 | 2   | 20 |
| 463 | 4 | 2 | 2 | 1 | 3 | 2.5 | 8  |
| 463 | 4 | 3 | 4 | 2 | 1 | 1   | 16 |
| 463 | 4 | 5 | 3 | 2 | 4 | 5   | 12 |
| 463 | 6 | 6 | 5 | 1 | 1 | 6   | 30 |
| 463 | 6 | 3 | 3 | 3 | 1 | 5.5 | 18 |
| 463 | 6 | 4 | 6 | 4 | 2 | 7   | 36 |
| 463 | 7 | 6 | 7 | 1 | 3 | 6.5 | 49 |
| 463 | 7 | 7 | 6 | 1 | 3 | 6   | 42 |
| 463 | 7 | 5 | 5 | 5 | 5 | 5.5 | 35 |

brand extension data

|     |   |   |   |   |   |     |    |
|-----|---|---|---|---|---|-----|----|
| 463 | 7 | 2 | 2 | 4 | 7 | 2.5 | 14 |
| 463 | 7 | 1 | 1 | 1 | 7 | 1   | 7  |
| 463 | 7 | 5 | 6 | 5 | 5 | 5.5 | 42 |
| 463 | 5 | 1 | 3 | 7 | 2 | 4.5 | 15 |
| 463 | 5 | 6 | 5 | 5 | 4 | 5   | 25 |
| 463 | 5 | 1 | 1 | 1 | 4 | 1.5 | 5  |
| 464 | 4 | 7 | 4 | 7 | 1 | 5   | 16 |
| 464 | 4 | 6 | 1 | 6 | 1 | 1   | 4  |
| 464 | 4 | 6 | 1 | 1 | 1 | 2   | 4  |
| 464 | 6 | 7 | 6 | 6 | 7 | 6.5 | 36 |
| 464 | 6 | 7 | 6 | 6 | 4 | 6   | 36 |
| 464 | 6 | 6 | 7 | 6 | 3 | 6   | 42 |
| 464 | 6 | 6 | 6 | 6 | 6 | 6   | 36 |
| 464 | 6 | 1 | 1 | 1 | 1 | 2.5 | 6  |
| 464 | 6 | 1 | 4 | 4 | 1 | 1.5 | 24 |
| 464 | 6 | 6 | 6 | 4 | 1 | 5.5 | 36 |
| 464 | 7 | 6 | 6 | 4 | 3 | 6   | 42 |
| 464 | 7 | 6 | 5 | 4 | 1 | 4   | 35 |
| 464 | 7 | 6 | 7 | 6 | 2 | 7   | 49 |
| 464 | 6 | 6 | 7 | 7 | 7 | 6.5 | 42 |
| 464 | 6 | 1 | 1 | 1 | 7 | 2.5 | 6  |
| 464 | 6 | 6 | 6 | 4 | 5 | 6.5 | 36 |
| 464 | 5 | 6 | 6 | 6 | 1 | 5   | 30 |
| 464 | 5 | 2 | 1 | 1 | 6 | 2.5 | 5  |
| 464 | 5 | 4 | 6 | 4 | 4 | 5.5 | 30 |
| 465 | 2 | 3 | 2 | 1 | 2 | 5.5 | 4  |
| 465 | 2 | 3 | 1 | 1 | 1 | 2   | 2  |
| 465 | 2 | 3 | 1 | 1 | 1 | 1.5 | 2  |
| 465 | 7 | 6 | 1 | 2 | 4 |     | 7  |
| 465 | 7 | 4 | 1 | 2 | 3 |     | 7  |
| 465 | 7 | 7 | 1 | 2 | 3 |     | 7  |
| 465 | 7 | 7 | 1 | 2 | 6 |     | 7  |
| 465 | 7 | 2 | 4 | 1 | 1 | 6   | 28 |
| 465 | 7 | 1 | 2 | 1 | 1 | 3.5 | 14 |
| 465 | 7 | 6 | 3 | 1 | 1 | 6.5 | 21 |
| 465 | 7 | 7 | 1 | 3 | 1 | 6   | 7  |
| 465 | 7 | 2 | 1 | 1 | 1 | 2   | 7  |
| 465 | 7 | 7 | 6 | 1 | 2 | 6.5 | 42 |
| 465 | 7 | 2 | 3 | 6 | 7 | 7   | 21 |
| 465 | 7 | 7 | 1 | 6 | 6 | 4   | 7  |
| 465 | 7 | 2 | 4 | 6 | 5 | 7   | 28 |
| 465 | 3 | 7 | 2 | 1 | 1 | 2   | 6  |
| 465 | 3 | 7 | 3 | 2 | 5 | 1.5 | 9  |
| 465 | 3 | 1 | 1 | 2 | 3 | 1.5 | 3  |
| 466 | 4 | 7 | 4 | 7 | 5 | 2.5 | 16 |
| 466 | 4 | 7 | 1 | 1 | 5 | 2   | 4  |
| 466 | 4 | 7 | 1 | 1 | 1 | 2   | 4  |
| 466 | 5 | 7 | 1 | 1 | 5 | 5   | 5  |
| 466 | 5 | 7 | 1 | 1 | 4 | 2.5 | 5  |
| 466 | 5 | 7 | 1 | 1 | 4 | 2.5 | 5  |
| 466 | 5 | 7 | 1 | 1 | 5 | 2   | 5  |

brand extension data

|     |   |   |   |   |   |     |    |
|-----|---|---|---|---|---|-----|----|
| 466 | 4 | 7 | 1 | 1 | 1 | 2.5 | 4  |
| 466 | 4 | 7 | 1 | 1 | 3 | 2.5 | 4  |
| 466 | 4 | 7 | 1 | 6 | 3 | 4.5 | 4  |
| 466 | 6 | 7 | 1 | 1 | 4 | 5.5 | 6  |
| 466 | 6 | 7 | 1 | 1 | 1 | 2.5 | 6  |
| 466 | 6 | 7 | 1 | 5 | 5 | 3   | 6  |
| 466 | 5 | 1 | 1 | 5 | 6 | 3   | 5  |
| 466 | 5 | 7 | 1 | 1 | 6 | 2.5 | 5  |
| 466 | 5 | 1 | 1 | 1 | 3 | 3   | 5  |
| 466 | 2 | 7 | 1 | 7 | 2 | 2   | 2  |
| 466 | 2 | 7 | 1 | 1 | 4 | 1   | 2  |
| 466 | 2 | 1 | 1 | 1 | 5 | 1   | 2  |
| 467 | 6 | 6 | 7 | 7 | 5 | 5.5 | 42 |
| 467 | 6 | 2 | 2 | 1 | 6 | 1.5 | 12 |
| 467 | 6 | 1 | 1 | 4 | 1 | 1.5 | 6  |
| 467 | 5 | 7 | 1 | 2 | 5 | 3   | 5  |
| 467 | 5 | 7 | 1 | 2 | 2 | 3   | 5  |
| 467 | 5 | 7 | 4 | 2 | 3 | 3.5 | 20 |
| 467 | 5 | 7 | 3 | 2 | 5 | 4   | 15 |
| 467 | 6 | 1 | 2 | 4 | 1 | 4   | 12 |
| 467 | 6 | 1 | 1 | 4 | 3 | 2.5 | 6  |
| 467 | 6 | 7 | 4 | 4 | 2 | 3.5 | 24 |
| 467 | 7 | 7 | 1 | 2 | 2 | 7   | 7  |
| 467 | 7 | 7 | 2 | 2 | 2 | 5.5 | 14 |
| 467 | 7 | 3 | 5 | 4 | 6 | 7   | 35 |
| 467 | 6 | 1 | 3 | 6 | 6 | 6   | 18 |
| 467 | 6 | 7 | 2 | 5 | 5 | 4   | 12 |
| 467 | 6 | 1 | 2 | 3 | 5 | 3   | 12 |
| 467 | 1 | 7 | 7 | 7 | 1 | 1.5 | 7  |
| 467 | 1 | 1 | 2 | 2 | 2 | 1.5 | 2  |
| 467 | 1 | 1 | 2 | 2 | 3 | 1.5 | 2  |
| 468 | 5 | 7 | 6 | 6 | 4 | 5.5 | 30 |
| 468 | 5 | 4 | 2 | 4 | 5 | 3   | 10 |
| 468 | 5 | 5 | 2 | 2 | 2 | 4   | 10 |
| 468 | 5 | 7 | 1 | 3 | 6 | 3.5 | 5  |
| 468 | 5 | 6 | 1 | 4 | 4 | 5   | 5  |
| 468 | 5 | 6 | 1 | 3 | 4 | 5.5 | 5  |
| 468 | 5 | 7 | 1 | 4 | 4 | 5   | 5  |
| 468 | 6 | 4 | 3 | 4 | 2 | 4.5 | 18 |
| 468 | 6 | 6 | 3 | 5 | 2 | 5.5 | 18 |
| 468 | 6 | 7 | 3 | 5 | 5 | 6.5 | 18 |
| 468 | 5 | 6 | 1 | 3 | 3 | 5.5 | 5  |
| 468 | 5 | 7 | 1 | 2 | 2 | 5   | 5  |
| 468 | 5 | 5 | 3 | 5 | 5 | 5.5 | 15 |
| 468 | 7 | 4 | 1 | 6 | 7 | 5.5 | 7  |
| 468 | 7 | 6 | 1 | 5 | 5 | 4.5 | 7  |
| 468 | 7 | 6 | 1 | 5 | 4 | 6   | 7  |
| 468 | 4 | 6 | 3 | 6 | 1 | 4.5 | 12 |
| 468 | 4 | 7 | 1 | 5 | 6 | 6   | 4  |
| 468 | 4 | 5 | 1 | 4 | 3 | 4.5 | 4  |
| 469 | 4 | 6 | 7 | 6 | 6 | 1.5 | 28 |

brand extension data

|     |   |   |   |   |   |     |    |
|-----|---|---|---|---|---|-----|----|
| 469 | 4 | 6 | 6 | 3 | 6 | 2   | 24 |
| 469 | 4 | 6 | 2 | 1 | 3 | 2   | 8  |
| 469 | 5 | 7 | 2 | 3 | 4 | 2.5 | 10 |
| 469 | 5 | 7 | 2 | 4 | 4 | 4   | 10 |
| 469 | 5 | 7 | 2 | 4 | 5 | 3   | 10 |
| 469 | 7 | 7 | 5 | 3 | 3 | 3   | 35 |
| 469 | 7 | 7 | 6 | 3 | 5 | 3.5 | 42 |
| 469 | 7 | 7 | 6 | 3 | 4 | 4.5 | 42 |
| 469 | 6 | 7 | 3 | 3 | 4 | 3.5 | 18 |
| 469 | 6 | 7 | 2 | 4 | 2 | 3   | 12 |
| 469 | 6 | 7 | 6 | 4 | 5 | 5.5 | 36 |
| 469 | 7 | 3 | 2 | 5 | 7 | 3   | 14 |
| 469 | 7 | 2 | 2 | 2 | 5 | 3   | 14 |
| 469 | 7 | 2 | 2 | 2 | 4 | 4.5 | 14 |
| 469 | 7 | 7 | 7 | 7 | 4 | 7   | 49 |
| 469 | 7 | 2 | 2 | 2 | 7 | 2   | 14 |
| 469 | 7 | 2 | 2 | 2 | 4 | 2.5 | 14 |
| 470 | 5 | 3 | 2 | 7 | 2 | 3   | 10 |
| 470 | 5 | 5 | 1 | 5 | 4 | 1.5 | 5  |
| 470 | 5 | 5 | 1 | 1 | 1 | 3.5 | 5  |
| 470 | 7 | 7 | 1 | 1 | 5 | 4   | 7  |
| 470 | 7 | 7 | 1 | 4 | 4 | 5.5 | 7  |
| 470 | 7 | 7 | 1 | 3 | 4 | 5   | 7  |
| 470 | 7 | 7 | 3 | 6 | 5 | 6.5 | 21 |
| 470 | 7 | 7 | 5 | 5 | 1 | 5.5 | 35 |
| 470 | 7 | 7 | 5 | 6 | 2 | 4   | 35 |
| 470 | 7 | 7 | 3 | 7 | 3 | 6.5 | 21 |
| 470 | 7 | 7 | 2 | 2 | 3 | 6.5 | 14 |
| 470 | 7 | 7 | 1 | 1 | 1 | 4.5 | 7  |
| 470 | 7 | 4 | 1 | 1 | 3 | 3.5 | 7  |
| 470 | 6 | 7 | 1 | 6 | 6 | 5   | 6  |
| 470 | 6 | 6 | 1 | 2 | 6 | 5   | 6  |
| 470 | 6 | 7 | 3 | 3 | 5 | 5.5 | 18 |
| 470 | 3 | 7 | 2 | 5 | 2 | 5   | 6  |
| 470 | 3 | 5 | 3 | 7 | 7 | 4.5 | 9  |
| 470 | 3 | 4 | 1 | 1 | 6 | 2   | 3  |
| 471 | 3 | 5 | 5 | 7 | 3 | 4.5 | 15 |
| 471 | 3 | 1 | 1 | 3 | 5 | 1   | 3  |
| 471 | 3 | 1 | 1 | 3 | 1 | 1   | 3  |
| 471 | 5 | 7 | 1 | 2 | 7 | 4   | 5  |
| 471 | 5 | 4 | 1 | 1 | 3 | 3.5 | 5  |
| 471 | 5 | 6 | 1 | 1 | 5 | 4   | 5  |
| 471 | 5 | 5 | 1 | 4 | 6 | 4.5 | 5  |
| 471 | 7 | 3 | 1 | 2 | 1 | 3.5 | 7  |
| 471 | 7 | 5 | 5 | 5 | 3 | 5   | 35 |
| 471 | 7 | 6 | 5 | 5 | 4 | 5   | 35 |
| 471 | 5 | 6 | 1 | 4 | 5 | 5   | 5  |
| 471 | 5 | 6 | 1 | 4 | 1 | 4.5 | 5  |
| 471 | 5 | 5 | 5 | 6 | 4 | 6   | 25 |
| 471 | 7 | 1 | 1 | 7 | 6 | 7   | 7  |
| 471 | 7 | 6 | 1 | 3 | 7 | 2.5 | 7  |

brand extension data

|     |   |   |   |   |   |     |    |
|-----|---|---|---|---|---|-----|----|
| 471 | 7 | 4 | 5 | 4 | 5 | 3   | 35 |
| 471 | 5 | 7 | 1 | 6 | 2 | 5.5 | 5  |
| 471 | 5 | 5 | 1 | 4 | 6 | 1   | 5  |
| 471 | 5 | 1 | 1 | 1 | 7 | 1   | 5  |
| 472 | 6 | 3 | 1 | 6 | 4 | 3.5 | 6  |
| 472 | 6 | 7 | 5 | 3 | 6 | 1   | 30 |
| 472 | 6 | 7 | 1 | 2 | 1 | 1.5 | 6  |
| 472 | 6 | 6 | 1 | 4 | 6 | 2.5 | 6  |
| 472 | 6 | 3 | 2 | 6 | 2 | 5   | 12 |
| 472 | 6 | 6 | 5 | 6 | 3 | 6   | 30 |
| 472 | 6 | 6 | 6 | 4 | 6 | 6.5 | 36 |
| 472 | 7 | 7 | 6 | 7 | 1 | 7   | 42 |
| 472 | 7 | 5 | 6 | 6 | 2 | 5   | 42 |
| 472 | 7 | 6 | 4 | 6 | 3 | 7   | 28 |
| 472 | 7 | 6 | 5 | 4 | 5 | 5.5 | 35 |
| 472 | 7 | 3 | 5 | 4 | 2 | 3   | 35 |
| 472 | 7 | 4 | 6 | 5 | 6 | 5.5 | 42 |
| 472 | 7 | 6 | 6 | 7 | 7 | 7   | 42 |
| 472 | 7 | 5 | 1 | 2 | 6 | 1.5 | 7  |
| 472 | 7 | 5 | 6 | 3 | 4 | 5   | 42 |
| 472 | 6 | 2 | 7 | 7 | 2 | 6.5 | 42 |
| 472 | 6 | 6 | 4 | 5 | 7 | 6.5 | 24 |
| 472 | 6 | 1 | 1 | 1 | 3 | 1   | 6  |
| 473 | 5 | 1 | 6 | 7 | 3 | 3.5 | 30 |
| 473 | 5 | 1 | 3 | 3 | 6 | 1   | 15 |
| 473 | 5 | 6 | 1 | 1 | 1 | 1   | 5  |
| 473 | 7 | 7 | 1 | 1 | 5 | 6   | 7  |
| 473 | 7 | 4 | 1 | 1 | 6 | 3   | 7  |
| 473 | 7 | 7 | 2 | 1 | 5 | 5   | 14 |
| 473 | 7 | 7 | 1 | 1 | 6 | 5   | 7  |
| 473 | 5 | 3 | 2 | 1 | 1 | 3   | 10 |
| 473 | 5 | 1 | 5 | 6 | 3 | 5.5 | 25 |
| 473 | 5 | 1 | 5 | 4 | 4 | 5.5 | 25 |
| 473 | 6 | 5 | 1 | 1 | 2 | 7   | 6  |
| 473 | 6 | 7 | 1 | 1 | 3 | 4   | 6  |
| 473 | 6 | 1 | 2 | 3 | 6 | 7   | 12 |
| 473 | 6 | 1 | 2 | 7 | 6 | 5   | 12 |
| 473 | 6 | 7 | 1 | 1 | 6 | 5   | 6  |
| 473 | 6 | 1 | 3 | 1 | 5 | 4.5 | 18 |
| 473 | 6 | 1 | 4 | 5 | 1 | 2.5 | 24 |
| 473 | 6 | 7 | 2 | 3 | 5 | 3   | 12 |
| 473 | 6 | 1 | 1 | 2 | 3 | 1   | 6  |
| 474 | 3 | 6 | 4 | 7 | 4 | 4.5 | 12 |
| 474 | 3 | 2 | 2 | 4 | 1 | 1   | 6  |
| 474 | 3 | 5 | 3 | 1 | 1 | 1   | 9  |
| 474 | 5 | 7 | 5 | 5 | 5 | 5   | 25 |
| 474 | 5 | 5 | 5 | 5 | 1 | 2.5 | 25 |
| 474 | 5 | 3 | 2 | 3 | 5 | 3.5 | 10 |
| 474 | 5 | 3 | 2 | 3 | 1 | 4.5 | 10 |
| 474 | 7 | 1 | 2 | 3 | 1 | 6   | 14 |
| 474 | 7 | 4 | 3 | 4 | 1 | 2   | 21 |

brand extension data

|     |   |   |   |   |   |     |    |
|-----|---|---|---|---|---|-----|----|
| 474 | 7 | 7 | 7 | 5 | 1 | 5.5 | 49 |
| 474 | 6 | 7 | 5 | 3 | 1 | 5   | 30 |
| 474 | 6 | 5 | 5 | 6 | 5 | 6   | 30 |
| 474 | 7 | 2 | 6 | 6 | 6 | 6   | 42 |
| 474 | 7 | 3 | 2 | 1 | 6 | 2   | 14 |
| 474 | 7 | 2 | 2 | 1 | 3 | 4.5 | 14 |
| 474 | 5 | 7 | 6 | 6 | 1 | 4   | 30 |
| 474 | 5 | 6 | 5 | 5 | 6 | 4.5 | 25 |
| 474 | 5 | 1 | 1 | 1 | 4 | 1   | 5  |
| 475 | 4 | 3 | 1 | 7 | 3 | 4   | 4  |
| 475 | 4 | 1 | 2 | 3 | 4 | 2.5 | 8  |
| 475 | 4 | 1 | 5 | 4 | 3 | 3   | 20 |
| 475 | 6 | 2 | 4 | 3 | 5 | 3   | 24 |
| 475 | 6 | 3 | 5 | 2 | 4 | 2   | 30 |
| 475 | 6 | 4 | 5 | 3 | 7 | 4   | 30 |
| 475 | 6 | 4 | 4 | 1 | 3 | 3   | 24 |
| 475 | 6 | 5 | 3 | 4 | 4 | 2   | 18 |
| 475 | 6 | 6 | 3 | 6 | 3 | 2   | 18 |
| 475 | 5 | 5 | 2 | 2 | 3 | 7   | 10 |
| 475 | 5 | 2 | 3 | 1 | 1 | 1   | 15 |
| 475 | 5 | 6 | 4 | 6 | 6 | 5   | 20 |
| 475 | 6 | 7 | 5 | 7 | 7 | 6   | 30 |
| 475 | 6 | 7 | 4 | 7 | 7 | 3.5 | 24 |
| 475 | 6 | 4 | 3 | 4 | 6 | 6.5 | 18 |
| 475 | 6 | 1 | 2 | 3 | 2 | 3.5 | 12 |
| 475 | 6 | 5 | 7 | 5 | 7 | 5   | 42 |
| 475 | 6 | 1 | 1 | 1 | 7 | 1   | 6  |
| 476 | 4 | 1 | 7 | 7 | 2 | 3   | 28 |
| 476 | 4 | 1 | 3 | 4 | 3 | 1   | 12 |
| 476 | 4 | 7 | 1 | 1 | 1 | 1   | 4  |
| 476 | 7 | 7 | 1 | 1 | 5 | 5.5 | 7  |
| 476 | 7 | 7 | 1 | 1 | 3 | 2   | 7  |
| 476 | 7 | 7 | 5 | 1 | 4 | 3.5 | 35 |
| 476 | 7 | 7 | 1 | 1 | 6 | 3.5 | 7  |
| 476 | 7 | 1 | 5 | 2 | 1 | 4   | 35 |
| 476 | 7 | 2 | 6 | 6 | 1 | 5.5 | 42 |
| 476 | 7 | 2 | 6 | 5 | 2 | 6.5 | 42 |
| 476 | 7 | 7 | 5 | 1 | 3 | 5.5 | 35 |
| 476 | 7 | 7 | 2 | 1 | 1 | 4   | 14 |
| 476 | 7 | 1 | 3 | 6 | 5 | 5   | 21 |
| 476 | 7 | 1 | 1 | 7 | 7 | 4   | 7  |
| 476 | 7 | 2 | 1 | 7 | 7 | 4.5 | 7  |
| 476 | 7 | 2 | 3 | 2 | 2 | 2   | 21 |
| 476 | 2 | 1 | 4 | 3 | 1 | 1.5 | 8  |
| 476 | 2 | 7 | 1 | 1 | 7 | 2.5 | 2  |
| 476 | 2 | 1 | 1 | 1 | 7 | 1   | 2  |
| 477 | 5 | 5 | 5 | 7 | 2 | 5   | 25 |
| 477 | 5 | 5 | 3 | 3 | 4 | 3.5 | 15 |
| 477 | 5 | 5 | 1 | 3 | 1 | 3   | 5  |
| 477 | 3 | 7 | 1 | 5 | 5 | 2.5 | 3  |
| 477 | 3 | 3 | 2 | 5 | 3 | 4   | 6  |

brand extension data

|     |   |   |   |   |   |     |    |
|-----|---|---|---|---|---|-----|----|
| 477 | 3 | 5 | 2 | 5 | 3 | 5   | 6  |
| 477 | 3 | 3 | 3 | 5 | 4 | 4.5 | 9  |
| 477 | 6 | 3 | 5 | 4 | 1 | 4   | 30 |
| 477 | 6 | 3 | 5 | 5 | 2 | 4.5 | 30 |
| 477 | 6 | 3 | 5 | 6 | 3 | 5.5 | 30 |
| 477 | 4 | 5 | 3 | 2 | 3 | 5   | 12 |
| 477 | 4 | 5 | 1 | 2 | 2 | 3.5 | 4  |
| 477 | 4 | 3 | 5 | 5 | 4 | 5   | 20 |
| 477 | 6 | 5 | 4 | 7 | 5 | 5.5 | 24 |
| 477 | 6 | 5 | 3 | 5 | 6 | 5   | 18 |
| 477 | 6 | 6 | 5 | 5 | 5 | 5   | 30 |
| 477 | 2 | 6 | 5 | 7 | 3 | 4.5 | 10 |
| 477 | 2 | 6 | 3 | 6 | 7 | 4.5 | 6  |
| 477 | 2 | 3 | 2 | 5 | 5 | 3.5 | 4  |
| 478 | 5 | 1 | 1 | 5 | 4 | 5   | 5  |
| 478 | 5 | 1 | 5 | 1 | 5 | 1.5 | 25 |
| 478 | 5 | 5 | 1 | 1 | 2 | 1   | 5  |
| 478 | 6 | 7 | 7 | 1 | 6 | 1.5 | 42 |
| 478 | 6 | 7 | 7 | 1 | 3 | 3   | 42 |
| 478 | 6 | 7 | 4 | 1 | 4 | 5   | 24 |
| 478 | 7 | 7 | 7 | 1 | 2 | 5   | 49 |
| 478 | 7 | 1 | 7 | 7 | 2 | 3   | 49 |
| 478 | 7 | 1 | 7 | 6 | 2 | 5.5 | 49 |
| 478 | 7 | 2 | 1 | 1 | 3 | 5   | 7  |
| 478 | 7 | 7 | 1 | 1 | 2 | 5   | 7  |
| 478 | 7 | 1 | 7 | 6 | 6 | 6   | 49 |
| 478 | 7 | 1 | 4 | 7 | 7 | 6   | 28 |
| 478 | 7 | 4 | 1 | 6 | 7 | 2.5 | 7  |
| 478 | 7 | 4 | 7 | 5 | 5 | 5.5 | 49 |
| 478 | 4 | 7 | 7 | 6 | 1 | 5   | 28 |
| 478 | 4 | 1 | 7 | 1 | 6 | 3   | 28 |
| 478 | 4 | 1 | 1 | 1 | 5 | 3   | 4  |
| 479 | 2 | 7 | 6 | 7 | 3 | 2.5 | 12 |
| 479 | 2 | 5 | 2 | 5 | 5 | 2   | 4  |
| 479 | 2 | 5 | 1 | 4 | 2 | 2.5 | 2  |
| 479 | 6 | 7 | 1 | 3 | 6 | 5.5 | 6  |
| 479 | 6 | 3 | 5 | 1 | 4 | 5   | 30 |
| 479 | 6 | 4 | 4 | 2 | 5 | 4.5 | 24 |
| 479 | 6 | 4 | 7 | 2 | 6 | 5   | 42 |
| 479 | 6 | 6 | 6 | 4 | 2 | 5.5 | 36 |
| 479 | 6 | 6 | 6 | 6 | 4 | 5   | 36 |
| 479 | 6 | 6 | 4 | 6 | 4 | 6.5 | 24 |
| 479 | 7 | 5 | 3 | 2 | 5 | 6.5 | 21 |
| 479 | 7 | 5 | 3 | 2 | 3 | 5.5 | 21 |
| 479 | 7 | 6 | 6 | 6 | 6 | 6   | 42 |
| 479 | 7 | 4 | 3 | 6 | 7 | 7   | 21 |
| 479 | 7 | 5 | 2 | 3 | 6 | 6.5 | 14 |
| 479 | 7 | 4 | 3 | 3 | 6 | 5.5 | 21 |
| 479 | 3 | 6 | 3 | 5 | 2 | 2.5 | 9  |
| 479 | 3 | 6 | 2 | 5 | 5 | 4   | 6  |
| 479 | 3 | 5 | 2 | 4 | 5 | 4   | 6  |

brand extension data

|     |   |   |   |   |   |     |    |
|-----|---|---|---|---|---|-----|----|
| 480 | 4 | 2 | 2 | 7 | 4 | 2.5 | 8  |
| 480 | 4 | 2 | 5 | 2 | 2 | 2   | 20 |
| 480 | 4 | 4 | 2 | 1 | 1 | 3   | 8  |
| 480 | 6 | 5 | 5 | 3 | 6 | 6   | 30 |
| 480 | 6 | 4 | 2 | 2 | 2 | 5.5 | 12 |
| 480 | 6 | 6 | 3 | 2 | 4 | 5.5 | 18 |
| 480 | 6 | 6 | 5 | 4 | 3 | 6   | 30 |
| 480 | 6 | 6 | 6 | 5 | 1 | 3.5 | 36 |
| 480 | 6 | 5 | 6 | 5 | 1 | 2   | 36 |
| 480 | 6 | 6 | 6 | 6 | 2 | 6   | 36 |
| 480 | 7 | 5 | 6 | 6 | 3 | 6   | 42 |
| 480 | 7 | 3 | 2 | 4 | 2 | 3   | 14 |
| 480 | 7 | 6 | 6 | 5 | 3 | 5.5 | 42 |
| 480 | 7 | 2 | 2 | 4 | 7 | 5.5 | 14 |
| 480 | 7 | 6 | 2 | 5 | 6 | 2   | 14 |
| 480 | 7 | 3 | 6 | 4 | 4 | 2.5 | 42 |
| 480 | 3 | 2 | 6 | 5 | 1 | 3.5 | 18 |
| 480 | 3 | 6 | 3 | 2 | 4 | 5.5 | 9  |
| 480 | 3 | 4 | 3 | 2 | 5 | 3   | 9  |
| 481 | 6 | 2 | 4 | 7 | 3 | 3.5 | 24 |
| 481 | 6 | 2 | 2 | 3 | 1 | 2.5 | 12 |
| 481 | 6 | 3 | 3 | 2 | 2 | 2.5 | 18 |
| 481 | 6 | 4 | 3 | 3 | 6 | 4.5 | 18 |
| 481 | 6 | 5 | 5 | 4 | 4 | 5   | 30 |
| 481 | 6 | 4 | 3 | 3 | 3 | 2.5 | 18 |
| 481 | 6 | 5 | 5 | 3 | 5 | 4.5 | 30 |
| 481 | 7 | 3 | 2 | 3 | 2 | 3   | 14 |
| 481 | 7 | 3 | 5 | 4 | 1 | 3.5 | 35 |
| 481 | 7 | 4 | 6 | 5 | 3 | 4.5 | 42 |
| 481 | 7 | 4 | 3 | 4 | 4 | 5   | 21 |
| 481 | 7 | 3 | 3 | 3 | 3 | 1.5 | 21 |
| 481 | 7 | 3 | 4 | 4 | 3 | 5.5 | 28 |
| 481 | 7 | 4 | 3 | 6 | 7 | 6.5 | 21 |
| 481 | 7 | 5 | 3 | 5 | 6 | 3.5 | 21 |
| 481 | 7 | 4 | 3 | 5 | 4 | 5   | 21 |
| 481 | 5 | 4 | 4 | 4 | 1 | 3.5 | 20 |
| 481 | 5 | 3 | 3 | 3 | 4 | 4   | 15 |
| 481 | 5 | 1 | 2 | 1 | 4 | 1.5 | 10 |
| 482 | 7 | 5 | 1 | 7 | 4 | 3.5 | 7  |
| 482 | 7 | 1 | 1 | 1 | 6 | 5   | 7  |
| 482 | 7 | 1 | 1 | 1 | 1 | 1.5 | 7  |
| 482 | 7 | 7 | 1 | 1 | 3 | 5.5 | 7  |
| 482 | 7 | 2 | 1 | 1 | 3 | 3   | 7  |
| 482 | 7 | 7 | 3 | 1 | 3 | 3   | 21 |
| 482 | 7 | 6 | 1 | 1 | 6 | 2.5 | 7  |
| 482 | 7 | 1 | 1 | 1 | 1 | 4   | 7  |
| 482 | 7 | 3 | 2 | 1 | 2 | 1.5 | 14 |
| 482 | 7 | 7 | 6 | 1 | 2 | 4.5 | 42 |
| 482 | 7 | 7 | 6 | 1 | 5 | 7   | 42 |
| 482 | 7 | 1 | 2 | 1 | 2 | 1.5 | 14 |
| 482 | 7 | 7 | 6 | 5 | 6 | 6   | 42 |

brand extension data

|     |   |   |   |   |   |     |    |
|-----|---|---|---|---|---|-----|----|
| 482 | 7 | 1 | 1 | 7 | 7 | 6   | 7  |
| 482 | 7 | 2 | 1 | 5 | 7 | 3.5 | 7  |
| 482 | 7 | 1 | 3 | 4 | 4 | 3.5 | 21 |
| 482 | 5 | 1 | 2 | 7 | 1 | 3   | 10 |
| 482 | 5 | 6 | 1 | 3 | 7 | 1.5 | 5  |
| 482 | 5 | 1 | 1 | 1 | 6 | 1   | 5  |
| 483 | 3 | 2 | 6 | 7 | 3 | 2   | 18 |
| 483 | 3 | 1 | 1 | 2 | 6 | 1.5 | 3  |
| 483 | 3 | 3 | 1 | 5 | 1 | 1.5 | 3  |
| 483 | 7 | 7 | 1 | 1 | 6 | 6   | 7  |
| 483 | 7 | 4 | 1 | 1 | 6 | 5.5 | 7  |
| 483 | 7 | 7 | 1 | 1 | 4 | 5.5 | 7  |
| 483 | 7 | 4 | 1 | 1 | 5 | 5   | 7  |
| 483 | 7 | 6 | 3 | 1 | 1 | 3.5 | 21 |
| 483 | 7 | 2 | 5 | 4 | 2 | 6.5 | 35 |
| 483 | 7 | 2 | 5 | 4 | 2 | 6.5 | 35 |
| 483 | 6 | 7 | 1 | 1 | 5 | 7   | 6  |
| 483 | 6 | 6 | 1 | 1 | 2 | 5.5 | 6  |
| 483 | 6 | 1 | 3 | 3 | 5 | 6   | 18 |
| 483 | 7 | 1 | 1 | 2 | 4 | 4   | 7  |
| 483 | 7 | 1 | 1 | 2 | 4 | 4.5 | 7  |
| 483 | 7 | 1 | 2 | 2 | 3 | 5.5 | 14 |
| 483 | 4 | 7 | 4 | 7 | 1 | 2.5 | 16 |
| 483 | 4 | 6 | 1 | 4 | 4 | 2   | 4  |
| 483 | 4 | 1 | 1 | 2 | 2 | 5   | 4  |
| 484 | 4 | 1 | 1 | 7 | 4 | 2.5 | 4  |
| 484 | 4 | 1 | 1 | 1 | 4 | 1   | 4  |
| 484 | 4 | 4 | 1 | 1 | 4 | 1   | 4  |
| 484 | 3 | 1 | 1 | 1 | 5 | 1   | 3  |
| 484 | 3 | 1 | 1 | 1 | 3 | 2   | 3  |
| 484 | 3 | 1 | 1 | 2 | 2 | 4.5 | 3  |
| 484 | 3 | 1 | 1 | 1 | 2 | 2   | 3  |
| 484 | 4 | 4 | 4 | 2 | 4 | 2.5 | 16 |
| 484 | 4 | 4 | 4 | 2 | 4 | 2   | 16 |
| 484 | 4 | 4 | 7 | 6 | 4 | 5.5 | 28 |
| 484 | 7 | 1 | 1 | 3 | 4 | 1.5 | 7  |
| 484 | 7 | 1 | 1 | 2 | 4 | 1.5 | 7  |
| 484 | 7 | 1 | 1 | 5 | 4 | 5   | 7  |
| 484 | 7 | 7 | 1 | 7 | 4 | 6.5 | 7  |
| 484 | 7 | 7 | 1 | 2 | 2 | 1.5 | 7  |
| 484 | 7 | 7 | 1 | 5 | 3 | 5.5 | 7  |
| 484 | 1 | 4 | 7 | 7 | 4 | 1   | 7  |
| 484 | 1 | 1 | 1 | 4 | 5 | 2   | 1  |
| 484 | 1 | 1 | 1 | 4 | 3 | 1   | 1  |
| 485 | 6 | 7 | 7 | 7 | 5 | 2   | 42 |
| 485 | 6 | 7 | 7 | 5 | 5 | 1.5 | 42 |
| 485 | 6 | 7 | 7 | 2 | 3 | 2   | 42 |
| 485 | 7 | 7 | 1 | 2 | 5 | 5   | 7  |
| 485 | 7 | 7 | 7 | 2 | 3 | 4.5 | 49 |
| 485 | 7 | 7 | 7 | 2 | 3 | 5.5 | 49 |
| 485 | 7 | 7 | 7 | 3 | 5 | 6   | 49 |

brand extension data

|     |   |   |   |   |   |     |    |
|-----|---|---|---|---|---|-----|----|
| 485 | 7 | 7 | 7 | 2 | 3 | 5   | 49 |
| 485 | 7 | 7 | 7 | 2 | 3 | 1.5 | 49 |
| 485 | 7 | 7 | 7 | 4 | 3 | 5.5 | 49 |
| 485 | 7 | 7 | 7 | 2 | 4 | 5   | 49 |
| 485 | 7 | 7 | 7 | 2 | 3 | 4   | 49 |
| 485 | 7 | 1 | 7 | 4 | 5 | 6   | 49 |
| 485 | 7 | 1 | 1 | 5 | 6 | 6   | 7  |
| 485 | 7 | 7 | 1 | 2 | 6 | 2   | 7  |
| 485 | 7 | 1 | 7 | 3 | 4 | 5.5 | 49 |
| 485 | 7 | 1 | 7 | 3 | 3 | 4.5 | 49 |
| 485 | 7 | 1 | 1 | 2 | 6 | 2   | 7  |
| 485 | 7 | 1 | 1 | 2 | 4 | 2   | 7  |
| 486 | 5 | 1 | 2 | 7 | 6 | 4   | 10 |
| 486 | 5 | 2 | 1 | 4 | 6 | 1   | 5  |
| 486 | 5 | 7 | 3 | 2 | 1 | 1.5 | 15 |
| 486 | 6 | 7 | 1 | 2 | 7 | 2   | 6  |
| 486 | 6 | 5 | 1 | 1 | 1 | 5.5 | 6  |
| 486 | 6 | 6 | 1 | 2 | 4 | 6   | 6  |
| 486 | 7 | 5 | 5 | 4 | 1 | 2   | 35 |
| 486 | 7 | 2 | 5 | 6 | 2 | 4.5 | 35 |
| 486 | 7 | 2 | 5 | 6 | 2 | 4.5 | 35 |
| 486 | 7 | 7 | 5 | 7 | 4 | 7   | 35 |
| 486 | 7 | 5 | 4 | 4 | 1 | 2.5 | 28 |
| 486 | 7 | 4 | 6 | 7 | 6 | 7   | 42 |
| 486 | 7 | 4 | 1 | 7 | 7 | 7   | 7  |
| 486 | 7 | 7 | 1 | 2 | 6 | 5.5 | 7  |
| 486 | 7 | 4 | 5 | 2 | 6 | 3   | 35 |
| 486 | 6 | 4 | 6 | 7 | 3 | 6   | 36 |
| 486 | 6 | 6 | 1 | 5 | 7 | 4.5 | 6  |
| 486 | 6 | 3 | 1 | 1 | 6 | 1   | 6  |
| 487 | 5 | 6 | 7 | 7 | 3 | 3.5 | 35 |
| 487 | 5 | 7 | 3 | 3 | 3 | 3.5 | 15 |
| 487 | 5 | 3 | 1 | 1 | 1 | 2   | 5  |
| 487 | 5 | 7 | 1 | 1 | 6 | 5   | 5  |
| 487 | 5 | 4 | 1 | 1 | 4 | 4   | 5  |
| 487 | 5 | 7 | 1 | 1 | 3 | 3.5 | 5  |
| 487 | 5 | 7 | 1 | 3 | 6 | 3.5 | 5  |
| 487 | 7 | 4 | 2 | 1 | 1 | 6.5 | 14 |
| 487 | 7 | 6 | 3 | 5 | 1 | 5.5 | 21 |
| 487 | 7 | 6 | 3 | 3 | 1 | 7   | 21 |
| 487 | 7 | 7 | 1 | 1 | 1 | 6   | 7  |
| 487 | 7 | 7 | 1 | 1 | 1 | 5.5 | 7  |
| 487 | 7 | 7 | 6 | 4 | 3 | 7   | 42 |
| 487 | 7 | 5 | 1 | 5 | 6 | 5   | 7  |
| 487 | 7 | 5 | 1 | 5 | 6 | 4.5 | 7  |
| 487 | 7 | 1 | 4 | 5 | 4 | 4.5 | 28 |
| 487 | 5 | 7 | 5 | 7 | 1 | 1   | 25 |
| 487 | 5 | 7 | 1 | 4 | 6 | 5   | 5  |
| 487 | 5 | 1 | 1 | 1 | 3 | 2   | 5  |
| 488 | 3 | 7 | 5 | 7 | 1 | 6   | 15 |
| 488 | 3 | 6 | 2 | 6 | 2 | 2   | 6  |

brand extension data

|     |   |   |   |   |   |     |    |
|-----|---|---|---|---|---|-----|----|
| 488 | 3 | 7 | 1 | 1 | 1 | 2   | 3  |
| 488 | 6 | 7 | 1 | 1 | 5 | 3.5 | 6  |
| 488 | 6 | 5 | 2 | 5 | 1 | 5   | 12 |
| 488 | 6 | 7 | 3 | 2 | 3 | 1.5 | 18 |
| 488 | 6 | 7 | 3 | 5 | 2 | 5.5 | 18 |
| 488 | 7 | 2 | 5 | 4 | 1 | 1.5 | 35 |
| 488 | 7 | 4 | 6 | 6 | 1 | 6   | 42 |
| 488 | 7 | 5 | 5 | 3 | 1 | 6.5 | 35 |
| 488 | 7 | 5 | 2 | 1 | 1 | 1   | 14 |
| 488 | 7 | 5 | 2 | 1 | 1 | 3.5 | 14 |
| 488 | 7 | 6 | 6 | 7 | 1 | 6.5 | 42 |
| 488 | 7 | 1 | 3 | 7 | 7 | 5   | 21 |
| 488 | 7 | 1 | 1 | 3 | 5 | 4.5 | 7  |
| 488 | 7 | 1 | 5 | 3 | 2 | 4   | 35 |
| 488 | 5 | 4 | 6 | 6 | 1 | 4   | 30 |
| 488 | 5 | 6 | 2 | 3 | 7 | 5   | 10 |
| 488 | 5 | 1 | 1 | 1 | 6 | 3   | 5  |
| 489 | 2 | 1 | 6 | 6 | 2 | 1.5 | 12 |
| 489 | 2 | 2 | 2 | 4 | 3 | 1   | 4  |
| 489 | 2 | 3 | 1 | 1 | 1 | 1.5 | 2  |
| 489 | 5 | 5 | 2 | 2 | 5 | 3.5 | 10 |
| 489 | 5 | 5 | 1 | 2 | 4 | 4.5 | 5  |
| 489 | 5 | 6 | 4 | 2 | 4 | 3.5 | 20 |
| 489 | 5 | 5 | 3 | 2 | 5 | 4   | 15 |
| 489 | 7 | 2 | 6 | 3 | 1 | 6.5 | 42 |
| 489 | 7 | 1 | 6 | 5 | 2 | 1.5 | 42 |
| 489 | 7 | 2 | 6 | 4 | 3 | 7   | 42 |
| 489 | 6 | 7 | 2 | 1 | 3 | 6   | 12 |
| 489 | 6 | 6 | 2 | 1 | 3 | 5   | 12 |
| 489 | 6 | 2 | 6 | 5 | 4 | 6   | 36 |
| 489 | 7 | 3 | 1 | 5 | 6 | 4   | 7  |
| 489 | 7 | 6 | 1 | 2 | 6 | 6   | 7  |
| 489 | 7 | 1 | 5 | 2 | 3 | 4   | 35 |
| 489 | 5 | 2 | 6 | 6 | 2 | 4.5 | 30 |
| 489 | 5 | 5 | 2 | 3 | 5 | 5   | 10 |
| 489 | 5 | 2 | 2 | 2 | 4 | 2   | 10 |
| 490 | 5 | 7 | 1 | 7 | 5 | 5   | 5  |
| 490 | 5 | 7 | 1 | 5 | 3 | 2.5 | 5  |
| 490 | 5 | 7 | 1 | 1 | 1 | 2   | 5  |
| 490 | 4 | 7 | 1 | 4 | 6 | 3.5 | 4  |
| 490 | 4 | 7 | 1 | 1 | 2 | 4   | 4  |
| 490 | 4 | 7 | 1 | 4 | 2 | 4   | 4  |
| 490 | 4 | 7 | 1 | 1 | 2 | 4   | 4  |
| 490 | 7 | 7 | 1 | 1 | 1 | 4   | 7  |
| 490 | 7 | 7 | 1 | 5 | 2 | 3   | 7  |
| 490 | 7 | 6 | 1 | 6 | 2 | 6.5 | 7  |
| 490 | 7 | 7 | 5 | 1 | 6 | 7   | 35 |
| 490 | 7 | 7 | 1 | 1 | 2 | 5.5 | 7  |
| 490 | 7 | 5 | 3 | 6 | 6 | 7   | 21 |
| 490 | 7 | 5 | 5 | 6 | 6 | 7   | 35 |
| 490 | 7 | 7 | 3 | 5 | 6 | 6.5 | 21 |

brand extension data

|     |   |   |   |   |   |     |    |
|-----|---|---|---|---|---|-----|----|
| 490 | 7 | 1 | 1 | 2 | 2 | 6.5 | 7  |
| 490 | 5 | 1 | 1 | 7 | 2 | 5   | 5  |
| 490 | 5 | 7 | 1 | 5 | 6 | 5.5 | 5  |
| 490 | 5 | 7 | 1 | 4 | 4 | 4   | 5  |
| 491 | 5 | 4 | 3 | 7 | 1 | 5   | 15 |
| 491 | 5 | 1 | 1 | 1 | 2 | 1   | 5  |
| 491 | 5 | 5 | 1 | 1 | 1 | 3.5 | 5  |
| 491 | 5 | 7 | 1 | 1 | 6 | 3.5 | 5  |
| 491 | 5 | 4 | 1 | 1 | 5 | 1   | 5  |
| 491 | 5 | 7 | 1 | 5 | 4 | 6.5 | 5  |
| 491 | 5 | 6 | 1 | 2 | 6 | 5   | 5  |
| 491 | 7 | 1 | 4 | 1 | 1 | 5.5 | 28 |
| 491 | 7 | 1 | 4 | 4 | 1 | 5.5 | 28 |
| 491 | 7 | 1 | 3 | 2 | 2 | 5.5 | 21 |
| 491 | 7 | 7 | 5 | 1 | 3 | 6.5 | 35 |
| 491 | 7 | 7 | 2 | 1 | 1 | 7   | 14 |
| 491 | 7 | 1 | 4 | 4 | 4 | 6.5 | 28 |
| 491 | 7 | 1 | 1 | 7 | 7 | 7   | 7  |
| 491 | 7 | 5 | 1 | 2 | 7 | 5   | 7  |
| 491 | 7 | 1 | 3 | 7 | 6 | 7   | 21 |
| 491 | 5 | 1 | 6 | 7 | 1 | 4   | 30 |
| 491 | 5 | 7 | 1 | 4 | 3 | 3   | 5  |
| 491 | 5 | 7 | 1 | 2 | 3 | 1   | 5  |
| 492 | 6 | 4 | 1 | 7 | 6 | 6   | 6  |
| 492 | 6 | 5 | 2 | 6 | 4 | 4.5 | 12 |
| 492 | 6 | 3 | 1 | 3 | 2 | 2   | 6  |
| 492 | 6 | 7 | 1 | 3 | 6 | 3.5 | 6  |
| 492 | 6 | 2 | 1 | 1 | 4 | 1.5 | 6  |
| 492 | 6 | 7 | 1 | 4 | 3 | 3.5 | 6  |
| 492 | 6 | 5 | 2 | 3 | 5 | 3   | 12 |
| 492 | 5 | 6 | 5 | 4 | 2 | 3.5 | 25 |
| 492 | 5 | 7 | 3 | 6 | 2 | 3.5 | 15 |
| 492 | 5 | 7 | 4 | 5 | 1 | 6   | 20 |
| 492 | 5 | 6 | 3 | 1 | 3 | 6.5 | 15 |
| 492 | 5 | 6 | 3 | 1 | 1 | 4   | 15 |
| 492 | 5 | 5 | 4 | 5 | 4 | 5.5 | 20 |
| 492 | 5 | 4 | 2 | 5 | 6 | 4.5 | 10 |
| 492 | 5 | 3 | 1 | 2 | 5 | 1.5 | 5  |
| 492 | 5 | 4 | 3 | 3 | 5 | 3   | 15 |
| 492 | 4 | 5 | 6 | 7 | 1 | 2.5 | 24 |
| 492 | 4 | 7 | 2 | 2 | 6 | 1.5 | 8  |
| 492 | 4 | 2 | 2 | 2 | 3 | 1.5 | 8  |
| 493 | 4 | 1 | 6 | 7 | 1 | 3.5 | 24 |
| 493 | 4 | 1 | 1 | 5 | 1 | 1   | 4  |
| 493 | 4 | 7 | 1 | 1 | 1 | 1   | 4  |
| 493 | 4 | 7 | 1 | 1 | 3 | 2   | 4  |
| 493 | 4 | 7 | 1 | 3 | 1 | 6   | 4  |
| 493 | 4 | 7 | 1 | 4 | 1 | 1   | 4  |
| 493 | 4 | 7 | 1 | 2 | 1 | 5   | 4  |
| 493 | 7 | 2 | 5 | 2 | 1 | 6.5 | 35 |
| 493 | 7 | 1 | 6 | 6 | 1 | 7   | 42 |

brand extension data

|     |   |   |   |   |   |     |    |
|-----|---|---|---|---|---|-----|----|
| 493 | 7 | 3 | 6 | 6 | 1 | 7   | 42 |
| 493 | 7 | 7 | 5 | 1 | 1 | 7   | 35 |
| 493 | 7 | 7 | 3 | 1 | 1 | 6.5 | 21 |
| 493 | 7 | 1 | 6 | 5 | 1 | 7   | 42 |
| 493 | 7 | 1 | 5 | 7 | 3 | 7   | 35 |
| 493 | 7 | 7 | 1 | 6 | 2 | 7   | 7  |
| 493 | 7 | 2 | 5 | 5 | 1 | 4.5 | 35 |
| 493 | 4 | 1 | 6 | 7 | 1 | 2   | 24 |
| 493 | 4 | 7 | 2 | 2 | 1 | 3.5 | 8  |
| 493 | 4 | 6 | 2 | 1 | 6 | 1   | 8  |
| 494 | 3 | 6 | 5 | 6 | 5 | 3   | 15 |
| 494 | 3 | 3 | 4 | 4 | 7 | 2.5 | 12 |
| 494 | 3 | 1 | 2 | 2 | 1 | 1   | 6  |
| 494 | 5 | 5 | 4 | 6 | 4 | 3.5 | 20 |
| 494 | 5 | 1 | 2 | 2 | 1 | 1   | 10 |
| 494 | 5 | 4 | 5 | 4 | 4 | 4.5 | 25 |
| 494 | 5 | 5 | 3 | 1 | 5 | 2   | 15 |
| 494 | 6 | 2 | 2 | 2 | 1 | 2   | 12 |
| 494 | 6 | 7 | 5 | 7 | 7 | 5   | 30 |
| 494 | 6 | 7 | 6 | 6 | 6 | 6   | 36 |
| 494 | 7 | 6 | 7 | 7 | 6 | 6   | 49 |
| 494 | 7 | 4 | 2 | 4 | 3 | 6   | 14 |
| 494 | 7 | 5 | 4 | 6 | 6 | 5.5 | 28 |
| 494 | 7 | 7 | 6 | 5 | 5 | 7   | 42 |
| 494 | 7 | 4 | 4 | 4 | 4 | 4.5 | 28 |
| 494 | 7 | 2 | 3 | 1 | 3 | 2.5 | 21 |
| 494 | 2 | 6 | 6 | 6 | 4 | 5   | 12 |
| 494 | 2 | 5 | 7 | 6 | 5 | 4   | 14 |
| 494 | 2 | 3 | 1 | 2 | 1 | 1   | 2  |
| 495 | 4 | 6 | 3 | 7 | 6 | 3   | 12 |
| 495 | 4 | 2 | 2 | 2 | 5 | 1   | 8  |
| 495 | 4 | 6 | 1 | 2 | 1 | 1.5 | 4  |
| 495 | 7 | 7 | 1 | 1 | 7 | 2   | 7  |
| 495 | 7 | 4 | 1 | 1 | 4 | 3.5 | 7  |
| 495 | 7 | 5 | 2 | 1 | 3 | 4.5 | 14 |
| 495 | 7 | 5 | 2 | 1 | 5 | 3   | 14 |
| 495 | 7 | 3 | 4 | 1 | 1 | 3.5 | 28 |
| 495 | 7 | 2 | 2 | 6 | 1 | 3   | 14 |
| 495 | 7 | 6 | 5 | 5 | 4 | 6.5 | 35 |
| 495 | 7 | 7 | 1 | 1 | 7 | 6.5 | 7  |
| 495 | 7 | 7 | 2 | 1 | 2 | 5   | 14 |
| 495 | 7 | 4 | 5 | 6 | 5 | 5.5 | 35 |
| 495 | 7 | 3 | 5 | 7 | 7 | 7   | 35 |
| 495 | 7 | 6 | 2 | 5 | 6 | 5   | 14 |
| 495 | 7 | 1 | 5 | 5 | 4 | 6.5 | 35 |
| 495 | 6 | 6 | 2 | 7 | 1 | 3   | 12 |
| 495 | 6 | 5 | 1 | 4 | 5 | 3   | 6  |
| 495 | 6 | 1 | 1 | 1 | 6 | 1   | 6  |
| 496 | 4 | 4 | 2 | 7 | 4 | 3.5 | 8  |
| 496 | 4 | 4 | 1 | 5 | 4 | 2   | 4  |
| 496 | 4 | 4 | 1 | 4 | 4 | 2.5 | 4  |

brand extension data

|     |   |   |   |   |   |     |    |
|-----|---|---|---|---|---|-----|----|
| 496 | 4 | 5 | 1 | 2 | 6 | 3   | 4  |
| 496 | 4 | 5 | 1 | 2 | 5 | 3.5 | 4  |
| 496 | 4 | 5 | 1 | 2 | 4 | 2.5 | 4  |
| 496 | 4 | 6 | 4 | 1 | 6 | 4   | 16 |
| 496 | 7 | 7 | 3 | 3 | 4 | 5   | 21 |
| 496 | 7 | 7 | 4 | 5 | 4 | 5   | 28 |
| 496 | 7 | 7 | 5 | 7 | 5 | 7   | 35 |
| 496 | 7 | 7 | 5 | 4 | 4 | 4.5 | 35 |
| 496 | 7 | 7 | 5 | 3 | 5 | 5   | 35 |
| 496 | 7 | 7 | 5 | 6 | 5 | 6   | 35 |
| 496 | 7 | 6 | 4 | 6 | 7 | 3   | 28 |
| 496 | 7 | 6 | 2 | 4 | 7 | 5   | 14 |
| 496 | 7 | 6 | 2 | 5 | 6 | 5   | 14 |
| 496 | 6 | 3 | 4 | 6 | 3 | 2.5 | 24 |
| 496 | 6 | 3 | 3 | 4 | 6 | 3.5 | 18 |
| 496 | 6 | 3 | 2 | 3 | 7 | 3.5 | 12 |
| 497 | 1 | 6 | 2 | 7 | 2 | 4   | 2  |
| 497 | 1 | 3 | 1 | 1 | 7 | 2.5 | 1  |
| 497 | 1 | 6 | 1 | 1 | 2 | 2.5 | 1  |
| 497 | 7 | 3 | 1 | 4 | 4 | 4   | 7  |
| 497 | 7 | 6 | 4 | 4 | 3 | 3.5 | 28 |
| 497 | 7 | 4 | 5 | 3 | 2 | 4   | 35 |
| 497 | 7 | 3 | 4 | 3 | 1 | 5.5 | 28 |
| 497 | 7 | 3 | 7 | 5 | 2 | 4.5 | 49 |
| 497 | 7 | 3 | 7 | 2 | 1 | 5   | 49 |
| 497 | 7 | 6 | 7 | 6 | 1 | 4.5 | 49 |
| 497 | 7 | 6 | 4 | 6 | 1 | 5.5 | 28 |
| 497 | 7 | 6 | 1 | 3 | 1 | 3.5 | 7  |
| 497 | 7 | 3 | 7 | 6 | 1 | 5.5 | 49 |
| 497 | 7 | 3 | 1 | 5 | 7 | 3.5 | 7  |
| 497 | 7 | 6 | 7 | 4 | 7 | 3.5 | 49 |
| 497 | 7 | 3 | 1 | 3 | 4 | 4   | 7  |
| 497 | 4 | 6 | 7 | 4 | 2 | 4.5 | 28 |
| 497 | 4 | 4 | 7 | 7 | 7 | 3   | 28 |
| 497 | 4 | 4 | 1 | 6 | 7 | 4.5 | 4  |
| 498 | 6 | 1 | 1 | 6 | 2 | 2   | 6  |
| 498 | 6 | 5 | 1 | 4 | 3 | 2   | 6  |
| 498 | 6 | 6 | 1 | 1 | 1 | 1.5 | 6  |
| 498 | 7 | 7 | 1 | 4 | 5 | 6   | 7  |
| 498 | 7 | 6 | 1 | 2 | 5 | 5.5 | 7  |
| 498 | 7 | 6 | 5 | 1 | 3 | 2.5 | 35 |
| 498 | 7 | 7 | 6 | 6 | 5 | 6   | 42 |
| 498 | 7 | 7 | 6 | 1 | 1 | 5.5 | 42 |
| 498 | 7 | 7 | 6 | 7 | 3 | 7   | 42 |
| 498 | 7 | 7 | 6 | 2 | 4 | 7   | 42 |
| 498 | 7 | 7 | 6 | 1 | 6 | 6.5 | 42 |
| 498 | 7 | 7 | 2 | 1 | 5 | 7   | 14 |
| 498 | 7 | 7 | 6 | 6 | 6 | 6.5 | 42 |
| 498 | 7 | 3 | 6 | 7 | 6 | 7   | 42 |
| 498 | 7 | 5 | 6 | 6 | 6 | 6.5 | 42 |
| 498 | 7 | 4 | 5 | 6 | 5 | 6   | 35 |

brand extension data

|     |   |   |   |   |   |     |    |
|-----|---|---|---|---|---|-----|----|
| 498 | 7 | 6 | 7 | 7 | 1 | 2.5 | 49 |
| 498 | 7 | 6 | 7 | 3 | 4 | 5   | 49 |
| 498 | 7 | 1 | 1 | 1 | 6 | 2   | 7  |
| 499 | 5 | 7 | 7 | 7 | 4 | 5   | 35 |
| 499 | 5 | 2 | 4 | 5 | 5 | 3.5 | 20 |
| 499 | 5 | 6 | 3 | 3 | 2 | 2.5 | 15 |
| 499 | 7 | 7 | 2 | 3 | 6 | 5.5 | 14 |
| 499 | 7 | 6 | 3 | 6 | 5 | 5.5 | 21 |
| 499 | 7 | 7 | 6 | 6 | 5 | 6.5 | 42 |
| 499 | 7 | 6 | 6 | 6 | 5 | 6.5 | 42 |
| 499 | 6 | 2 | 4 | 2 | 2 | 4   | 24 |
| 499 | 6 | 3 | 5 | 6 | 2 | 5.5 | 30 |
| 499 | 6 | 7 | 7 | 7 | 4 | 6   | 42 |
| 499 | 7 | 6 | 5 | 4 | 5 | 7   | 35 |
| 499 | 7 | 7 | 4 | 3 | 3 | 6   | 28 |
| 499 | 7 | 5 | 5 | 7 | 6 | 6.5 | 35 |
| 499 | 6 | 1 | 4 | 6 | 5 | 6   | 24 |
| 499 | 6 | 7 | 1 | 5 | 5 | 5.5 | 6  |
| 499 | 6 | 6 | 2 | 5 | 5 | 5   | 12 |
| 499 | 4 | 5 | 5 | 7 | 1 | 5   | 20 |
| 499 | 4 | 1 | 3 | 5 | 7 | 3   | 12 |
| 499 | 4 | 3 | 1 | 5 | 5 | 3.5 | 4  |
| 500 | 3 | 1 | 5 | 7 | 4 | 1.5 | 15 |
| 500 | 3 | 5 | 6 | 4 | 6 | 1   | 18 |
| 500 | 3 | 5 | 5 | 5 | 3 | 3   | 15 |
| 500 | 6 | 7 | 4 | 3 | 6 | 5.5 | 24 |
| 500 | 6 | 3 | 5 | 1 | 2 | 4.5 | 30 |
| 500 | 6 | 6 | 5 | 4 | 3 | 5.5 | 30 |
| 500 | 6 | 3 | 3 | 4 | 4 | 5   | 18 |
| 500 | 6 | 6 | 6 | 5 | 3 | 6   | 36 |
| 500 | 6 | 5 | 7 | 6 | 3 | 5.5 | 42 |
| 500 | 6 | 2 | 6 | 7 | 4 | 6   | 36 |
| 500 | 7 | 6 | 4 | 5 | 5 | 5.5 | 28 |
| 500 | 7 | 5 | 4 | 3 | 3 | 5.5 | 28 |
| 500 | 7 | 5 | 5 | 6 | 6 | 6.5 | 35 |
| 500 | 7 | 1 | 1 | 6 | 6 | 6.5 | 7  |
| 500 | 7 | 3 | 2 | 4 | 7 | 3   | 14 |
| 500 | 7 | 3 | 3 | 2 | 3 | 4   | 21 |
| 500 | 2 | 2 | 5 | 6 | 1 | 1.5 | 10 |
| 500 | 2 | 5 | 1 | 4 | 6 | 1   | 2  |
| 500 | 2 | 2 | 3 | 2 | 2 | 2.5 | 6  |
| 501 | 4 | 5 | 2 | 6 | 6 | 2.5 | 8  |
| 501 | 4 | 3 | 2 | 3 | 5 | 3   | 8  |
| 501 | 4 | 5 | 1 | 2 | 1 | 2   | 4  |
| 501 | 4 | 6 | 3 | 2 | 5 | 2.5 | 12 |
| 501 | 4 | 5 | 4 | 1 | 4 | 4   | 16 |
| 501 | 4 | 6 | 5 | 1 | 4 | 4   | 20 |
| 501 | 4 | 6 | 5 | 4 | 5 | 4.5 | 20 |
| 501 | 6 | 4 | 2 | 3 | 1 | 1.5 | 12 |
| 501 | 6 | 4 | 6 | 5 | 3 | 5.5 | 36 |
| 501 | 6 | 3 | 5 | 5 | 3 | 5   | 30 |

brand extension data

|     |   |   |   |   |   |     |    |
|-----|---|---|---|---|---|-----|----|
| 501 | 6 | 6 | 3 | 1 | 4 | 5.5 | 18 |
| 501 | 6 | 3 | 4 | 1 | 3 | 3.5 | 24 |
| 501 | 6 | 4 | 1 | 5 | 4 | 5   | 6  |
| 501 | 7 | 6 | 5 | 6 | 6 | 6.5 | 35 |
| 501 | 7 | 6 | 4 | 2 | 6 | 3.5 | 28 |
| 501 | 7 | 4 | 2 | 3 | 4 | 3.5 | 14 |
| 501 | 4 | 3 | 3 | 6 | 2 | 2.5 | 12 |
| 501 | 4 | 5 | 5 | 1 | 7 | 4   | 20 |
| 501 | 4 | 2 | 4 | 1 | 6 | 2.5 | 16 |
| 502 | 3 | 7 | 5 | 7 | 3 | 5.5 | 15 |
| 502 | 3 | 5 | 2 | 2 | 6 | 4.5 | 6  |
| 502 | 3 | 7 | 3 | 2 | 2 | 3   | 9  |
| 502 | 7 | 7 | 1 | 3 | 6 | 5   | 7  |
| 502 | 7 | 4 | 2 | 3 | 2 | 4.5 | 14 |
| 502 | 7 | 6 | 3 | 3 | 3 | 4   | 21 |
| 502 | 7 | 5 | 4 | 3 | 5 | 5   | 28 |
| 502 | 7 | 4 | 4 | 1 | 2 | 3.5 | 28 |
| 502 | 7 | 5 | 5 | 2 | 2 | 4   | 35 |
| 502 | 7 | 7 | 5 | 3 | 3 | 6   | 35 |
| 502 | 7 | 5 | 2 | 2 | 3 | 5   | 14 |
| 502 | 7 | 5 | 2 | 2 | 3 | 4   | 14 |
| 502 | 7 | 6 | 5 | 4 | 6 | 4   | 35 |
| 502 | 6 | 4 | 1 | 6 | 7 | 4.5 | 6  |
| 502 | 6 | 5 | 1 | 5 | 6 | 5   | 6  |
| 502 | 6 | 3 | 2 | 5 | 5 | 4.5 | 12 |
| 502 | 4 | 2 | 6 | 7 | 2 | 5.5 | 24 |
| 502 | 4 | 5 | 3 | 3 | 1 | 4   | 12 |
| 502 | 4 | 5 | 2 | 3 | 6 | 6.5 | 8  |
| 503 | 6 | 6 | 6 | 7 | 4 | 5   | 36 |
| 503 | 6 | 2 | 2 | 2 | 5 | 1   | 12 |
| 503 | 6 | 4 | 2 | 2 | 1 | 2   | 12 |
| 503 | 6 | 7 | 4 | 5 | 5 | 6   | 24 |
| 503 | 6 | 3 | 3 | 4 | 2 | 3   | 18 |
| 503 | 6 | 5 | 5 | 4 | 3 | 4.5 | 30 |
| 503 | 6 | 6 | 5 | 5 | 5 | 5.5 | 30 |
| 503 | 6 | 6 | 4 | 5 | 1 | 4.5 | 24 |
| 503 | 6 | 4 | 5 | 5 | 1 | 2   | 30 |
| 503 | 6 | 6 | 6 | 7 | 2 | 5   | 36 |
| 503 | 7 | 7 | 5 | 4 | 2 | 6   | 35 |
| 503 | 7 | 6 | 3 | 2 | 2 | 4   | 21 |
| 503 | 7 | 4 | 6 | 6 | 6 | 6   | 42 |
| 503 | 7 | 4 | 2 | 6 | 6 | 6   | 14 |
| 503 | 7 | 2 | 1 | 2 | 5 | 4.5 | 7  |
| 503 | 7 | 4 | 3 | 3 | 5 | 3.5 | 21 |
| 503 | 5 | 7 | 7 | 7 | 2 | 3   | 35 |
| 503 | 5 | 5 | 4 | 3 | 5 | 3.5 | 20 |
| 503 | 5 | 1 | 2 | 1 | 1 | 1.5 | 10 |
| 504 | 5 | 2 | 5 | 6 | 3 | 5   | 25 |
| 504 | 5 | 1 | 1 | 2 | 3 | 4   | 5  |
| 504 | 5 | 1 | 1 | 1 | 1 | 1   | 5  |
| 504 | 6 | 7 | 1 | 1 | 6 | 4.5 | 6  |

brand extension data

|     |   |   |   |   |   |     |    |
|-----|---|---|---|---|---|-----|----|
| 504 | 6 | 6 | 1 | 1 | 5 | 3   | 6  |
| 504 | 6 | 7 | 1 | 1 | 5 | 4   | 6  |
| 504 | 6 | 6 | 1 | 3 | 5 | 3   | 6  |
| 504 | 7 | 1 | 2 | 1 | 1 | 2   | 14 |
| 504 | 7 | 2 | 2 | 2 | 2 | 6   | 14 |
| 504 | 7 | 3 | 5 | 3 | 3 | 6   | 35 |
| 504 | 7 | 7 | 1 | 1 | 3 | 7   | 7  |
| 504 | 7 | 7 | 1 | 1 | 2 | 7   | 7  |
| 504 | 7 | 3 | 2 | 3 | 2 | 7   | 14 |
| 504 | 7 | 3 | 1 | 6 | 6 | 4   | 7  |
| 504 | 7 | 5 | 1 | 1 | 7 | 5   | 7  |
| 504 | 7 | 3 | 3 | 2 | 2 | 5.5 | 21 |
| 504 | 3 | 6 | 5 | 6 | 2 | 1.5 | 15 |
| 504 | 3 | 6 | 2 | 2 | 5 | 3.5 | 6  |
| 504 | 3 | 1 | 1 | 1 | 4 | 2.5 | 3  |
| 505 | 4 | 7 | 4 | 4 | 5 | 3.5 | 16 |
| 505 | 4 | 7 | 2 | 1 | 4 | 2   | 8  |
| 505 | 5 | 7 | 1 | 1 | 1 | 2.5 | 5  |
| 505 | 5 | 5 | 3 | 1 | 7 | 3.5 | 15 |
| 505 | 5 | 7 | 5 | 5 | 3 | 5.5 | 25 |
| 505 | 5 | 6 | 4 | 5 | 5 | 5.5 | 20 |
| 505 | 4 | 3 | 6 | 4 | 4 | 4.5 | 24 |
| 505 | 4 | 4 | 7 | 6 | 2 | 4   | 28 |
| 505 | 4 | 3 | 7 | 6 | 3 | 7   | 28 |
| 505 | 5 | 7 | 4 | 1 | 2 | 6.5 | 20 |
| 505 | 5 | 7 | 3 | 1 | 2 | 5.5 | 15 |
| 505 | 5 | 5 | 5 | 4 | 5 | 5.5 | 25 |
| 505 | 5 | 1 | 4 | 6 | 7 | 5   | 20 |
| 505 | 5 | 7 | 1 | 1 | 7 | 2   | 5  |
| 505 | 5 | 1 | 2 | 1 | 4 | 1.5 | 10 |
| 505 | 1 | 7 | 6 | 5 | 1 | 2.5 | 6  |
| 505 | 1 | 4 | 3 | 3 | 5 | 3   | 3  |
| 505 | 1 | 1 | 1 | 1 | 4 | 1   | 1  |
| 506 | 5 | 6 | 6 | 6 | 4 | 5   | 30 |
| 506 | 5 | 6 | 4 | 3 | 5 | 1.5 | 20 |
| 506 | 5 | 5 | 1 | 1 | 1 | 2   | 5  |
| 506 | 3 | 6 | 2 | 1 | 6 | 2   | 6  |
| 506 | 3 | 2 | 2 | 2 | 4 | 3.5 | 6  |
| 506 | 3 | 5 | 2 | 1 | 3 | 5   | 6  |
| 506 | 3 | 6 | 4 | 2 | 6 | 5.5 | 12 |
| 506 | 4 | 5 | 3 | 1 | 1 | 5.5 | 12 |
| 506 | 4 | 2 | 1 | 3 | 1 | 1.5 | 4  |
| 506 | 4 | 5 | 6 | 4 | 4 | 6   | 24 |
| 506 | 3 | 7 | 4 | 2 | 5 | 4.5 | 12 |
| 506 | 3 | 1 | 1 | 1 | 1 | 1   | 3  |
| 506 | 3 | 7 | 7 | 6 | 5 | 6   | 21 |
| 506 | 7 | 4 | 2 | 7 | 7 | 7   | 14 |
| 506 | 7 | 6 | 2 | 4 | 7 | 1.5 | 14 |
| 506 | 7 | 3 | 2 | 2 | 4 | 2   | 14 |
| 506 | 5 | 4 | 5 | 6 | 1 | 5.5 | 25 |
| 506 | 5 | 5 | 1 | 3 | 6 | 2   | 5  |

brand extension data

|     |   |   |   |   |   |     |    |
|-----|---|---|---|---|---|-----|----|
| 506 | 5 | 3 | 2 | 2 | 2 | 3   | 10 |
| 507 | 4 | 3 | 3 | 6 | 4 | 4.5 | 12 |
| 507 | 4 | 1 | 1 | 4 | 4 | 1   | 4  |
| 507 | 4 | 1 | 1 | 3 | 3 | 1.5 | 4  |
| 507 | 5 | 4 | 4 | 4 | 3 | 5.5 | 20 |
| 507 | 5 | 4 | 3 | 3 | 3 | 3.5 | 15 |
| 507 | 5 | 6 | 5 | 4 | 2 | 3.5 | 25 |
| 507 | 5 | 5 | 4 | 5 | 4 | 3.5 | 20 |
| 507 | 6 | 5 | 5 | 5 | 3 | 4.5 | 30 |
| 507 | 6 | 6 | 5 | 5 | 5 | 6.5 | 30 |
| 507 | 6 | 6 | 7 | 6 | 5 | 6.5 | 42 |
| 507 | 6 | 5 | 5 | 4 | 3 | 5   | 30 |
| 507 | 6 | 5 | 5 | 4 | 5 | 5.5 | 30 |
| 507 | 6 | 6 | 5 | 5 | 4 | 5.5 | 30 |
| 507 | 6 | 6 | 3 | 5 | 5 | 6.5 | 18 |
| 507 | 6 | 3 | 3 | 2 | 4 | 2   | 18 |
| 507 | 6 | 5 | 4 | 4 | 2 | 6.5 | 24 |
| 507 | 6 | 5 | 6 | 7 | 2 | 3   | 36 |
| 507 | 6 | 5 | 4 | 4 | 6 | 1   | 24 |
| 507 | 6 | 1 | 2 | 3 | 3 | 1   | 12 |
| 508 | 3 | 7 | 7 | 6 | 4 | 3   | 21 |
| 508 | 3 | 6 | 4 | 4 | 6 | 3   | 12 |
| 508 | 3 | 6 | 6 | 2 | 4 | 5   | 18 |
| 508 | 5 | 6 | 5 | 2 | 5 | 5   | 25 |
| 508 | 5 | 3 | 4 | 4 | 3 | 5.5 | 20 |
| 508 | 5 | 6 | 5 | 4 | 3 | 4   | 25 |
| 508 | 5 | 3 | 3 | 4 | 4 | 4.5 | 15 |
| 508 | 7 | 6 | 5 | 4 | 4 | 7   | 35 |
| 508 | 7 | 2 | 2 | 3 | 4 | 7   | 14 |
| 508 | 7 | 6 | 5 | 3 | 4 | 6   | 35 |
| 508 | 7 | 6 | 7 | 2 | 5 | 6   | 49 |
| 508 | 7 | 4 | 4 | 4 | 4 | 2   | 28 |
| 508 | 7 | 4 | 2 | 6 | 4 | 5.5 | 14 |
| 508 | 6 | 2 | 1 | 7 | 6 | 5.5 | 6  |
| 508 | 6 | 6 | 6 | 5 | 6 | 5   | 36 |
| 508 | 6 | 3 | 2 | 4 | 3 | 4   | 12 |
| 508 | 4 | 7 | 7 | 7 | 1 | 6.5 | 28 |
| 508 | 4 | 5 | 4 | 6 | 4 | 3.5 | 16 |
| 508 | 4 | 2 | 6 | 2 | 1 | 2.5 | 24 |
| 509 | 5 | 6 | 5 | 7 | 4 | 5.5 | 25 |
| 509 | 5 | 6 | 3 | 5 | 6 | 2.5 | 15 |
| 509 | 5 | 6 | 2 | 2 | 3 | 2   | 10 |
| 509 | 6 | 6 | 3 | 3 | 6 | 5   | 18 |
| 509 | 6 | 5 | 3 | 2 | 5 | 3.5 | 18 |
| 509 | 6 | 6 | 4 | 4 | 5 | 3   | 24 |
| 509 | 6 | 5 | 4 | 2 | 6 | 4.5 | 24 |
| 509 | 7 | 4 | 6 | 3 | 3 | 6   | 42 |
| 509 | 7 | 3 | 5 | 5 | 2 | 5   | 35 |
| 509 | 7 | 6 | 7 | 6 | 2 | 6.5 | 49 |
| 509 | 6 | 6 | 3 | 5 | 3 | 6   | 18 |
| 509 | 6 | 6 | 3 | 5 | 2 | 5.5 | 18 |

brand extension data

|     |   |   |   |   |   |     |    |
|-----|---|---|---|---|---|-----|----|
| 509 | 6 | 3 | 5 | 5 | 3 | 6   | 30 |
| 509 | 6 | 2 | 2 | 4 | 7 | 5   | 12 |
| 509 | 6 | 4 | 1 | 2 | 7 | 2.5 | 6  |
| 509 | 6 | 5 | 4 | 4 | 5 | 5   | 24 |
| 509 | 5 | 5 | 6 | 7 | 2 | 2.5 | 30 |
| 509 | 5 | 6 | 4 | 2 | 7 | 2.5 | 20 |
| 509 | 5 | 3 | 1 | 1 | 6 | 2   | 5  |
| 510 | 4 | 5 | 5 | 7 | 3 | 2.5 | 20 |
| 510 | 4 | 6 | 2 | 4 | 6 | 1   | 8  |
| 510 | 4 | 3 | 2 | 1 | 1 | 2   | 8  |
| 510 | 6 | 6 | 5 | 2 | 6 | 4   | 30 |
| 510 | 6 | 6 | 5 | 2 | 5 | 4   | 30 |
| 510 | 6 | 5 | 5 | 5 | 3 | 4.5 | 30 |
| 510 | 6 | 5 | 2 | 4 | 7 | 2   | 12 |
| 510 | 5 | 3 | 6 | 7 | 1 | 4.5 | 30 |
| 510 | 5 | 4 | 3 | 5 | 3 | 3   | 15 |
| 510 | 5 | 3 | 6 | 7 | 4 | 5   | 30 |
| 510 | 7 | 5 | 6 | 6 | 5 | 6   | 42 |
| 510 | 7 | 3 | 3 | 2 | 2 | 4.5 | 21 |
| 510 | 7 | 5 | 5 | 7 | 4 | 3.5 | 35 |
| 510 | 7 | 3 | 3 | 6 | 7 | 5   | 21 |
| 510 | 7 | 5 | 2 | 2 | 6 | 3.5 | 14 |
| 510 | 3 | 3 | 2 | 5 | 7 | 4.5 | 6  |
| 510 | 3 | 4 | 1 | 1 | 6 | 2   | 3  |
| 511 | 4 | 1 | 1 | 6 | 3 | 1   | 4  |
| 511 | 4 | 3 | 1 | 2 | 3 | 1.5 | 4  |
| 511 | 4 | 1 | 1 | 2 | 2 | 1.5 | 4  |
| 511 | 6 | 7 | 1 | 5 | 6 | 6.5 | 6  |
| 511 | 6 | 7 | 1 | 2 | 5 | 5.5 | 6  |
| 511 | 6 | 7 | 1 | 3 | 4 | 5.5 | 6  |
| 511 | 6 | 7 | 1 | 5 | 6 | 6   | 6  |
| 511 | 4 | 5 | 4 | 3 | 2 | 1.5 | 16 |
| 511 | 4 | 4 | 5 | 3 | 2 | 2.5 | 20 |
| 511 | 4 | 4 | 6 | 4 | 2 | 4.5 | 24 |
| 511 | 3 | 1 | 1 | 1 | 1 | 2   | 3  |
| 511 | 3 | 1 | 1 | 1 | 1 | 1.5 | 3  |
| 511 | 3 | 6 | 5 | 5 | 5 | 6.5 | 15 |
| 511 | 6 | 1 | 1 | 6 | 6 | 6.5 | 6  |
| 511 | 6 | 5 | 1 | 2 | 5 | 3   | 6  |
| 511 | 6 | 1 | 1 | 1 | 4 | 2.5 | 6  |
| 511 | 3 | 7 | 6 | 6 | 2 | 2.5 | 18 |
| 511 | 3 | 1 | 1 | 1 | 5 | 2   | 3  |
| 511 | 3 | 1 | 1 | 1 | 5 | 1   | 3  |
| 512 | 2 | 4 | 5 | 7 | 5 | 5   | 10 |
| 512 | 2 | 7 | 1 | 3 | 7 | 1   | 2  |
| 512 | 2 | 7 | 1 | 2 | 1 | 2   | 2  |
| 512 | 6 | 7 | 1 | 3 | 6 | 2   | 6  |
| 512 | 6 | 7 | 3 | 6 | 2 | 5.5 | 18 |
| 512 | 6 | 7 | 2 | 5 | 2 | 6   | 12 |
| 512 | 6 | 7 | 3 | 6 | 7 | 6   | 18 |
| 512 | 6 | 4 | 6 | 3 | 1 | 5.5 | 36 |

brand extension data

|     |   |   |   |   |   |     |    |
|-----|---|---|---|---|---|-----|----|
| 512 | 6 | 2 | 5 | 5 | 1 | 2.5 | 30 |
| 512 | 6 | 4 | 6 | 3 | 2 | 6.5 | 36 |
| 512 | 5 | 7 | 4 | 1 | 5 | 5.5 | 20 |
| 512 | 5 | 7 | 3 | 1 | 2 | 3   | 15 |
| 512 | 5 | 5 | 5 | 5 | 7 | 6.5 | 25 |
| 512 | 6 | 4 | 3 | 4 | 6 | 5   | 18 |
| 512 | 6 | 6 | 2 | 3 | 6 | 4   | 12 |
| 512 | 6 | 3 | 3 | 2 | 5 | 2.5 | 18 |
| 512 | 2 | 1 | 5 | 7 | 3 | 1   | 10 |
| 512 | 2 | 1 | 4 | 4 | 6 | 1.5 | 8  |
| 512 | 2 | 1 | 1 | 1 | 2 | 1   | 2  |
| 513 | 5 | 5 | 6 | 5 | 4 | 5   | 30 |
| 513 | 5 | 1 | 1 | 1 | 6 | 1   | 5  |
| 513 | 5 | 6 | 1 | 1 | 1 | 1.5 | 5  |
| 513 | 5 | 7 | 1 | 1 | 4 | 3   | 5  |
| 513 | 5 | 7 | 3 | 1 | 2 | 3   | 15 |
| 513 | 5 | 7 | 3 | 3 | 2 | 3   | 15 |
| 513 | 5 | 7 | 3 | 3 | 2 | 3   | 15 |
| 513 | 6 | 4 | 6 | 3 | 1 | 5   | 36 |
| 513 | 6 | 3 | 5 | 5 | 1 | 5   | 30 |
| 513 | 6 | 2 | 4 | 4 | 1 | 5   | 24 |
| 513 | 6 | 5 | 3 | 3 | 1 | 5   | 18 |
| 513 | 6 | 7 | 2 | 3 | 1 | 5   | 12 |
| 513 | 6 | 3 | 1 | 4 | 3 | 5   | 6  |
| 513 | 6 | 2 | 1 | 6 | 6 | 5.5 | 6  |
| 513 | 6 | 4 | 1 | 2 | 3 | 2.5 | 6  |
| 513 | 6 | 5 | 4 | 2 | 4 | 3.5 | 24 |
| 513 | 4 | 7 | 6 | 6 | 1 | 4.5 | 24 |
| 513 | 4 | 7 | 2 | 4 | 5 | 4   | 8  |
| 513 | 4 | 2 | 1 | 1 | 5 | 3   | 4  |
| 514 | 4 | 6 | 6 | 7 | 3 | 3   | 24 |
| 514 | 4 | 7 | 2 | 5 | 4 | 2.5 | 8  |
| 514 | 4 | 3 | 2 | 1 | 1 | 2   | 8  |
| 514 | 6 | 7 | 4 | 3 | 4 | 6   | 24 |
| 514 | 6 | 7 | 1 | 1 | 1 | 3.5 | 6  |
| 514 | 6 | 7 | 1 | 1 | 2 | 4.5 | 6  |
| 514 | 6 | 7 | 1 | 2 | 3 | 6   | 6  |
| 514 | 6 | 4 | 1 | 1 | 1 | 3.5 | 6  |
| 514 | 6 | 4 | 5 | 5 | 1 | 4   | 30 |
| 514 | 6 | 6 | 4 | 6 | 1 | 6.5 | 24 |
| 514 | 6 | 7 | 6 | 1 | 4 | 6.5 | 36 |
| 514 | 6 | 3 | 1 | 1 | 1 | 3.5 | 6  |
| 514 | 6 | 7 | 3 | 1 | 5 | 7   | 18 |
| 514 | 6 | 7 | 1 | 5 | 7 | 6   | 6  |
| 514 | 6 | 7 | 6 | 4 | 6 | 3   | 36 |
| 514 | 6 | 7 | 5 | 3 | 2 | 6.5 | 30 |
| 514 | 1 | 3 | 4 | 7 | 1 | 1   | 4  |
| 514 | 1 | 3 | 1 | 2 | 5 | 1.5 | 1  |
| 514 | 1 | 4 | 1 | 1 | 4 | 1   | 1  |
| 515 | 5 | 5 | 5 | 7 | 7 | 4   | 25 |
| 515 | 5 | 5 | 1 | 4 | 7 | 3   | 5  |

brand extension data

|     |   |   |   |   |   |     |    |
|-----|---|---|---|---|---|-----|----|
| 515 | 5 | 5 | 1 | 3 | 1 | 2   | 5  |
| 515 | 5 | 5 | 1 | 5 | 7 | 4   | 5  |
| 515 | 5 | 5 | 1 | 3 | 5 | 4   | 5  |
| 515 | 5 | 4 | 1 | 4 | 4 | 3.5 | 5  |
| 515 | 5 | 5 | 1 | 4 | 7 | 3.5 | 5  |
| 515 | 7 | 3 | 4 | 5 | 1 | 4   | 28 |
| 515 | 7 | 5 | 2 | 5 | 2 | 6   | 14 |
| 515 | 7 | 5 | 2 | 5 | 3 | 6   | 14 |
| 515 | 7 | 5 | 1 | 3 | 2 | 6   | 7  |
| 515 | 7 | 5 | 1 | 3 | 2 | 6   | 7  |
| 515 | 7 | 5 | 3 | 6 | 7 | 6   | 21 |
| 515 | 6 | 2 | 1 | 6 | 7 | 4.5 | 6  |
| 515 | 6 | 5 | 1 | 6 | 7 | 4.5 | 6  |
| 515 | 6 | 4 | 2 | 5 | 6 | 3.5 | 12 |
| 515 | 2 | 5 | 4 | 6 | 3 | 4.5 | 8  |
| 515 | 2 | 2 | 1 | 3 | 6 | 2.5 | 2  |
| 515 | 2 | 3 | 1 | 2 | 7 | 2.5 | 2  |
| 516 | 5 | 6 | 1 | 5 | 3 | 3   | 5  |
| 516 | 5 | 6 | 1 | 2 | 5 | 1.5 | 5  |
| 516 | 5 | 6 | 1 | 2 | 2 | 3.5 | 5  |
| 516 | 5 | 6 | 1 | 2 | 6 | 3   | 5  |
| 516 | 5 | 6 | 4 | 5 | 5 | 5   | 20 |
| 516 | 5 | 5 | 5 | 5 | 4 | 4.5 | 25 |
| 516 | 5 | 6 | 5 | 5 | 3 | 6   | 25 |
| 516 | 6 | 6 | 5 | 2 | 2 | 4   | 30 |
| 516 | 6 | 6 | 5 | 6 | 1 | 5.5 | 30 |
| 516 | 6 | 6 | 5 | 6 | 2 | 6   | 30 |
| 516 | 6 | 6 | 3 | 1 | 6 | 5   | 18 |
| 516 | 6 | 6 | 2 | 1 | 3 | 5.5 | 12 |
| 516 | 6 | 6 | 1 | 4 | 5 | 4.5 | 6  |
| 516 | 7 | 6 | 1 | 6 | 6 | 6.5 | 7  |
| 516 | 7 | 6 | 1 | 2 | 5 | 3.5 | 7  |
| 516 | 7 | 6 | 6 | 3 | 2 | 1.5 | 42 |
| 516 | 3 | 6 | 6 | 4 | 1 | 3   | 18 |
| 516 | 3 | 6 | 1 | 1 | 5 | 1.5 | 3  |
| 516 | 3 | 6 | 1 | 2 | 5 | 2   | 3  |
| 517 | 3 | 2 | 1 | 6 | 3 | 4   | 3  |
| 517 | 3 | 6 | 1 | 1 | 7 | 1.5 | 3  |
| 517 | 3 | 7 | 1 | 1 | 4 | 3   | 3  |
| 517 | 6 | 3 | 3 | 2 | 6 | 5.5 | 18 |
| 517 | 6 | 5 | 2 | 1 | 4 | 3.5 | 12 |
| 517 | 6 | 5 | 3 | 1 | 3 | 4   | 18 |
| 517 | 6 | 4 | 3 | 1 | 5 | 5   | 18 |
| 517 | 7 | 7 | 4 | 2 | 4 | 5.5 | 28 |
| 517 | 7 | 6 | 6 | 6 | 2 | 5   | 42 |
| 517 | 7 | 5 | 6 | 5 | 3 | 6   | 42 |
| 517 | 6 | 3 | 4 | 2 | 4 | 6.5 | 24 |
| 517 | 6 | 2 | 3 | 1 | 2 | 5.5 | 18 |
| 517 | 6 | 3 | 5 | 2 | 6 | 6   | 30 |
| 517 | 6 | 5 | 2 | 7 | 6 | 6   | 12 |
| 517 | 6 | 4 | 3 | 4 | 5 | 4   | 18 |

brand extension data

|     |   |   |   |   |   |     |    |
|-----|---|---|---|---|---|-----|----|
| 517 | 6 | 6 | 3 | 3 | 4 | 4.5 | 18 |
| 517 | 1 | 7 | 6 | 6 | 1 | 1   | 6  |
| 517 | 1 | 7 | 7 | 7 | 1 | 1   | 7  |
| 517 | 1 | 4 | 1 | 2 | 3 | 1   | 1  |
| 518 | 4 | 4 | 6 | 7 | 4 | 3   | 24 |
| 518 | 4 | 5 | 3 | 2 | 6 | 1.5 | 12 |
| 518 | 4 | 2 | 2 | 1 | 1 | 1.5 | 8  |
| 518 | 6 | 7 | 1 | 1 | 5 | 3   | 6  |
| 518 | 6 | 4 | 1 | 1 | 2 | 5.5 | 6  |
| 518 | 6 | 6 | 1 | 2 | 3 | 4   | 6  |
| 518 | 6 | 7 | 1 | 1 | 4 | 3.5 | 6  |
| 518 | 6 | 1 | 2 | 1 | 1 | 2.5 | 12 |
| 518 | 6 | 4 | 4 | 4 | 4 | 6   | 24 |
| 518 | 6 | 6 | 2 | 2 | 5 | 6   | 12 |
| 518 | 6 | 7 | 2 | 1 | 5 | 5.5 | 12 |
| 518 | 6 | 7 | 2 | 1 | 4 | 5.5 | 12 |
| 518 | 6 | 4 | 4 | 4 | 6 | 5   | 24 |
| 518 | 7 | 2 | 1 | 6 | 6 | 5   | 7  |
| 518 | 7 | 4 | 1 | 1 | 7 | 3.5 | 7  |
| 518 | 7 | 6 | 3 | 3 | 5 | 5   | 21 |
| 518 | 3 | 3 | 4 | 7 | 3 | 5.5 | 12 |
| 518 | 3 | 5 | 1 | 5 | 6 | 4   | 3  |
| 518 | 3 | 2 | 1 | 3 | 2 | 2.5 | 3  |
| 519 | 2 | 1 | 3 | 7 | 3 | 1.5 | 6  |
| 519 | 2 | 2 | 3 | 5 | 6 | 1   | 6  |
| 519 | 2 | 7 | 2 | 1 | 1 | 2.5 | 4  |
| 519 | 5 | 5 | 1 | 2 | 5 | 5.5 | 5  |
| 519 | 5 | 7 | 1 | 2 | 3 | 5.5 | 5  |
| 519 | 5 | 7 | 2 | 2 | 4 | 5.5 | 10 |
| 519 | 5 | 7 | 2 | 3 | 5 | 5   | 10 |
| 519 | 6 | 4 | 6 | 1 | 1 | 5.5 | 36 |
| 519 | 6 | 5 | 6 | 3 | 2 | 5   | 36 |
| 519 | 6 | 7 | 7 | 3 | 2 | 6.5 | 42 |
| 519 | 7 | 5 | 4 | 1 | 3 | 4.5 | 28 |
| 519 | 7 | 4 | 4 | 1 | 3 | 5.5 | 28 |
| 519 | 7 | 6 | 7 | 5 | 5 | 7   | 49 |
| 519 | 5 | 3 | 1 | 4 | 4 | 6   | 5  |
| 519 | 5 | 5 | 2 | 3 | 6 | 6   | 10 |
| 519 | 5 | 3 | 7 | 4 | 4 | 6.5 | 35 |
| 519 | 2 | 6 | 7 | 7 | 2 | 2   | 14 |
| 519 | 2 | 7 | 2 | 4 | 6 | 5   | 4  |
| 519 | 2 | 1 | 1 | 1 | 4 | 1   | 2  |
| 520 | 6 | 1 | 7 | 6 | 4 | 2.5 | 42 |
| 520 | 6 | 5 | 5 | 2 | 6 | 3   | 30 |
| 520 | 6 | 7 | 4 | 2 | 1 | 4   | 24 |
| 520 | 5 | 7 | 2 | 2 | 5 | 3   | 10 |
| 520 | 5 | 7 | 5 | 1 | 2 | 2.5 | 25 |
| 520 | 5 | 7 | 2 | 2 | 3 | 5.5 | 10 |
| 520 | 5 | 5 | 1 | 2 | 6 | 3.5 | 5  |
| 520 | 6 | 5 | 5 | 5 | 1 | 5   | 30 |
| 520 | 6 | 4 | 5 | 5 | 1 | 5.5 | 30 |

brand extension data

|     |   |   |   |   |   |     |    |
|-----|---|---|---|---|---|-----|----|
| 520 | 7 | 7 | 1 | 3 | 7 | 7   | 7  |
| 520 | 7 | 2 | 3 | 5 | 4 | 6   | 21 |
| 520 | 1 | 1 | 5 | 7 | 2 | 1   | 5  |
| 520 | 1 | 7 | 2 | 6 | 6 | 1   | 2  |
| 520 | 1 | 6 | 1 | 6 | 4 | 2.5 | 1  |
| 522 | 5 | 6 | 6 | 7 | 2 | 4.5 | 30 |
| 522 | 5 | 2 | 4 | 3 | 6 | 3.5 | 20 |
| 522 | 5 | 6 | 1 | 2 | 1 | 3   | 5  |
| 522 | 7 | 7 | 2 | 3 | 5 | 4   | 14 |
| 522 | 7 | 6 | 2 | 1 | 3 | 5   | 14 |
| 522 | 7 | 7 | 4 | 1 | 3 | 5   | 28 |
| 522 | 7 | 7 | 6 | 4 | 6 | 4.5 | 42 |
| 522 | 7 | 5 | 5 | 3 | 1 | 4.5 | 35 |
| 522 | 7 | 5 | 7 | 6 | 2 | 3.5 | 49 |
| 522 | 7 | 4 | 6 | 5 | 2 | 4.5 | 42 |
| 522 | 7 | 7 | 5 | 5 | 4 | 6.5 | 35 |
| 522 | 7 | 5 | 3 | 2 | 1 | 5.5 | 21 |
| 522 | 7 | 3 | 4 | 6 | 6 | 5.5 | 28 |
| 522 | 7 | 6 | 3 | 7 | 6 | 6.5 | 21 |
| 522 | 7 | 5 | 1 | 5 | 5 | 5   | 7  |
| 522 | 7 | 2 | 1 | 3 | 2 | 5.5 | 7  |
| 522 | 5 | 6 | 6 | 6 | 1 | 2.5 | 30 |
| 522 | 5 | 6 | 5 | 4 | 3 | 3   | 25 |
| 522 | 5 | 1 | 4 | 1 | 4 | 4.5 | 20 |
| 523 | 1 | 6 | 1 | 7 | 2 | 2   | 1  |
| 523 | 1 | 7 | 2 | 5 | 6 | 1.5 | 2  |
| 523 | 1 | 7 | 5 | 1 | 1 | 1   | 5  |
| 523 | 7 | 7 | 1 | 4 | 6 | 6   | 7  |
| 523 | 7 | 2 | 1 | 3 | 5 | 6   | 7  |
| 523 | 7 | 5 | 3 | 5 | 5 | 5.5 | 21 |
| 523 | 7 | 3 | 1 | 5 | 7 | 6.5 | 7  |
| 523 | 6 | 6 | 6 | 2 | 1 | 6   | 36 |
| 523 | 6 | 2 | 6 | 7 | 3 | 6   | 36 |
| 523 | 6 | 2 | 7 | 7 | 4 | 7   | 42 |
| 523 | 7 | 7 | 2 | 2 | 2 | 7   | 14 |
| 523 | 7 | 1 | 1 | 1 | 1 | 4.5 | 7  |
| 523 | 7 | 6 | 6 | 7 | 6 | 7   | 42 |
| 523 | 5 | 1 | 1 | 6 | 7 | 6.5 | 5  |
| 523 | 5 | 3 | 1 | 4 | 7 | 3.5 | 5  |
| 523 | 5 | 1 | 4 | 5 | 6 | 5   | 20 |
| 523 | 3 | 1 | 5 | 7 | 1 | 2.5 | 15 |
| 523 | 3 | 7 | 1 | 1 | 7 | 3   | 3  |
| 523 | 3 | 1 | 1 | 1 | 2 | 1.5 | 3  |
| 524 | 5 | 2 | 4 | 7 | 5 | 3.5 | 20 |
| 524 | 5 | 4 | 3 | 3 | 6 | 2   | 15 |
| 524 | 5 | 3 | 2 | 2 | 1 | 2.5 | 10 |
| 524 | 6 | 7 | 2 | 1 | 6 | 5.5 | 12 |
| 524 | 6 | 7 | 3 | 3 | 4 | 5   | 18 |
| 524 | 6 | 6 | 3 | 3 | 5 | 6   | 18 |
| 524 | 6 | 6 | 4 | 4 | 3 | 6   | 24 |
| 524 | 7 | 5 | 5 | 5 | 1 | 6.5 | 35 |

brand extension data

|     |   |   |   |   |   |     |    |
|-----|---|---|---|---|---|-----|----|
| 524 | 7 | 4 | 5 | 6 | 1 | 5   | 35 |
| 524 | 7 | 4 | 7 | 7 | 4 | 6.5 | 49 |
| 524 | 6 | 6 | 3 | 2 | 2 | 6.5 | 18 |
| 524 | 6 | 6 | 1 | 3 | 2 | 6   | 6  |
| 524 | 6 | 3 | 4 | 5 | 6 | 6.5 | 24 |
| 524 | 6 | 2 | 2 | 7 | 7 | 6.5 | 12 |
| 524 | 6 | 4 | 3 | 3 | 6 | 5   | 18 |
| 524 | 6 | 3 | 4 | 7 | 2 | 6.5 | 24 |
| 524 | 3 | 5 | 6 | 7 | 1 | 5   | 18 |
| 524 | 3 | 6 | 1 | 2 | 6 | 5.5 | 3  |
| 524 | 3 | 1 | 1 | 1 | 4 | 2.5 | 3  |
| 525 | 5 | 7 | 7 | 7 | 3 | 4   | 35 |
| 525 | 5 | 6 | 4 | 5 | 3 | 1   | 20 |
| 525 | 5 | 3 | 3 | 2 | 1 | 2   | 15 |
| 525 | 6 | 6 | 4 | 3 | 5 | 6   | 24 |
| 525 | 6 | 5 | 1 | 3 | 3 | 4.5 | 6  |
| 525 | 6 | 2 | 5 | 5 | 2 | 5   | 30 |
| 525 | 6 | 5 | 3 | 5 | 5 | 7   | 18 |
| 525 | 7 | 6 | 2 | 4 | 1 | 6   | 14 |
| 525 | 7 | 6 | 6 | 6 | 3 | 7   | 42 |
| 525 | 7 | 6 | 5 | 6 | 4 | 7   | 35 |
| 525 | 5 | 5 | 2 | 3 | 3 | 7   | 10 |
| 525 | 5 | 2 | 2 | 2 | 2 | 6.5 | 10 |
| 525 | 5 | 1 | 2 | 4 | 3 | 5   | 10 |
| 525 | 6 | 1 | 5 | 6 | 7 | 6.5 | 30 |
| 525 | 6 | 1 | 1 | 2 | 6 | 6   | 6  |
| 525 | 6 | 1 | 2 | 3 | 4 | 6.5 | 12 |
| 525 | 4 | 6 | 6 | 6 | 3 | 3   | 24 |
| 525 | 4 | 7 | 5 | 5 | 5 | 4   | 20 |
| 525 | 4 | 3 | 4 | 1 | 5 | 3.5 | 16 |
| 526 | 5 | 4 | 4 | 6 | 3 | 5.5 | 20 |
| 526 | 5 | 1 | 1 | 5 | 2 | 1.5 | 5  |
| 526 | 5 | 4 | 1 | 1 | 1 | 1   | 5  |
| 526 | 7 | 7 | 1 | 2 | 6 | 5   | 7  |
| 526 | 7 | 4 | 1 | 1 | 2 | 4   | 7  |
| 526 | 7 | 4 | 1 | 2 | 2 | 6   | 7  |
| 526 | 7 | 4 | 1 | 2 | 4 | 3.5 | 7  |
| 526 | 5 | 2 | 3 | 1 | 1 | 4.5 | 15 |
| 526 | 5 | 1 | 5 | 5 | 3 | 5   | 25 |
| 526 | 5 | 3 | 7 | 6 | 2 | 6   | 35 |
| 526 | 6 | 6 | 1 | 1 | 2 | 5   | 6  |
| 526 | 6 | 1 | 1 | 1 | 2 | 2.5 | 6  |
| 526 | 6 | 2 | 1 | 3 | 3 | 5.5 | 6  |
| 526 | 6 | 1 | 1 | 4 | 6 | 5   | 6  |
| 526 | 6 | 7 | 1 | 2 | 7 | 2.5 | 6  |
| 526 | 6 | 1 | 5 | 6 | 5 | 4.5 | 30 |
| 526 | 5 | 7 | 2 | 7 | 1 | 2   | 10 |
| 526 | 5 | 5 | 1 | 2 | 4 | 1   | 5  |
| 526 | 5 | 1 | 1 | 1 | 3 | 4   | 5  |
| 527 | 4 | 4 | 4 | 7 | 4 | 2   | 16 |
| 527 | 4 | 6 | 6 | 5 | 3 | 2.5 | 24 |

brand extension data

|     |   |   |   |   |   |     |    |
|-----|---|---|---|---|---|-----|----|
| 527 | 4 | 2 | 2 | 4 | 1 | 1   | 8  |
| 527 | 6 | 7 | 1 | 3 | 4 | 5   | 6  |
| 527 | 6 | 7 | 2 | 1 | 3 | 2.5 | 12 |
| 527 | 6 | 3 | 3 | 5 | 2 | 1   | 18 |
| 527 | 6 | 5 | 2 | 5 | 6 | 4   | 12 |
| 527 | 5 | 2 | 5 | 4 | 1 | 1   | 25 |
| 527 | 5 | 6 | 5 | 6 | 3 | 6.5 | 25 |
| 527 | 5 | 6 | 5 | 6 | 4 | 4   | 25 |
| 527 | 3 | 6 | 4 | 5 | 5 | 6.5 | 12 |
| 527 | 3 | 2 | 4 | 2 | 2 | 4.5 | 12 |
| 527 | 3 | 5 | 5 | 4 | 4 | 7   | 15 |
| 527 | 7 | 6 | 2 | 4 | 7 | 3.5 | 14 |
| 527 | 7 | 5 | 2 | 2 | 6 | 3.5 | 14 |
| 527 | 7 | 6 | 6 | 4 | 5 | 4.5 | 42 |
| 527 | 1 | 1 | 7 | 3 | 2 | 1   | 7  |
| 527 | 1 | 1 | 6 | 6 | 6 | 1   | 6  |
| 527 | 1 | 4 | 3 | 4 | 6 | 3   | 3  |
| 528 | 3 | 7 | 7 | 7 | 3 | 2.5 | 21 |
| 528 | 3 | 3 | 1 | 5 | 4 | 1   | 3  |
| 528 | 3 | 1 | 1 | 1 | 1 | 2   | 3  |
| 528 | 5 | 7 | 1 | 5 | 4 | 3   | 5  |
| 528 | 5 | 7 | 1 | 2 | 3 | 3.5 | 5  |
| 528 | 5 | 7 | 1 | 2 | 3 | 5   | 5  |
| 528 | 5 | 7 | 1 | 2 | 5 | 3.5 | 5  |
| 528 | 4 | 1 | 4 | 4 | 1 | 3.5 | 16 |
| 528 | 4 | 1 | 5 | 5 | 1 | 2   | 20 |
| 528 | 4 | 1 | 5 | 4 | 1 | 5   | 20 |
| 528 | 6 | 5 | 1 | 2 | 2 | 6   | 6  |
| 528 | 6 | 3 | 1 | 2 | 2 | 3.5 | 6  |
| 528 | 6 | 2 | 5 | 5 | 5 | 5.5 | 30 |
| 528 | 7 | 1 | 1 | 7 | 6 | 3.5 | 7  |
| 528 | 7 | 7 | 2 | 5 | 7 | 4   | 14 |
| 528 | 7 | 1 | 5 | 3 | 4 | 2.5 | 35 |
| 528 | 2 | 5 | 6 | 6 | 2 | 1.5 | 12 |
| 528 | 2 | 5 | 2 | 1 | 3 | 1.5 | 4  |
| 528 | 2 | 1 | 1 | 1 | 5 | 2.5 | 2  |
| 529 | 4 | 3 | 3 | 6 | 4 | 4   | 12 |
| 529 | 4 | 1 | 1 | 5 | 6 | 1   | 4  |
| 529 | 4 | 1 | 1 | 1 | 1 | 1   | 4  |
| 529 | 6 | 5 | 1 | 3 | 5 | 2.5 | 6  |
| 529 | 6 | 6 | 4 | 3 | 4 | 4.5 | 24 |
| 529 | 6 | 4 | 4 | 3 | 3 | 4.5 | 24 |
| 529 | 6 | 6 | 5 | 4 | 6 | 4.5 | 30 |
| 529 | 7 | 5 | 4 | 3 | 1 | 2   | 28 |
| 529 | 7 | 4 | 5 | 5 | 3 | 6   | 35 |
| 529 | 7 | 7 | 7 | 6 | 5 | 7   | 49 |
| 529 | 7 | 7 | 2 | 3 | 7 | 4.5 | 14 |
| 529 | 7 | 3 | 3 | 3 | 2 | 3   | 21 |
| 529 | 7 | 3 | 2 | 6 | 6 | 7   | 14 |
| 529 | 7 | 2 | 5 | 7 | 7 | 6   | 35 |
| 529 | 7 | 4 | 4 | 6 | 6 | 5.5 | 28 |

brand extension data

|     |   |   |   |   |   |     |    |
|-----|---|---|---|---|---|-----|----|
| 529 | 7 | 3 | 2 | 3 | 4 | 5.5 | 14 |
| 529 | 2 | 6 | 6 | 5 | 2 | 5   | 12 |
| 529 | 2 | 2 | 3 | 1 | 6 | 4   | 6  |
| 529 | 2 | 5 | 4 | 4 | 3 | 1   | 8  |
| 530 | 3 | 5 | 5 | 7 | 4 | 3   | 15 |
| 530 | 3 | 5 | 2 | 4 | 5 | 1.5 | 6  |
| 530 | 3 | 4 | 1 | 1 | 1 | 1.5 | 3  |
| 530 | 5 | 5 | 1 | 1 | 5 | 4.5 | 5  |
| 530 | 5 | 5 | 1 | 1 | 4 | 4   | 5  |
| 530 | 5 | 6 | 1 | 1 | 3 | 4   | 5  |
| 530 | 5 | 6 | 1 | 1 | 4 | 4   | 5  |
| 530 | 6 | 6 | 5 | 1 | 1 | 2.5 | 30 |
| 530 | 6 | 6 | 7 | 5 | 4 | 4   | 42 |
| 530 | 6 | 6 | 5 | 5 | 4 | 6   | 30 |
| 530 | 6 | 6 | 1 | 1 | 3 | 2   | 6  |
| 530 | 6 | 6 | 1 | 1 | 4 | 4   | 6  |
| 530 | 6 | 6 | 1 | 4 | 6 | 6   | 6  |
| 530 | 6 | 3 | 1 | 2 | 6 | 5   | 6  |
| 530 | 6 | 6 | 1 | 1 | 5 | 2   | 6  |
| 530 | 6 | 6 | 5 | 1 | 5 | 5   | 30 |
| 530 | 1 | 3 | 1 | 6 | 2 | 4   | 1  |
| 530 | 1 | 3 | 1 | 1 | 4 | 4   | 1  |
| 530 | 1 | 3 | 1 | 1 | 4 | 1.5 | 1  |
| 531 | 5 | 6 | 6 | 7 | 4 | 4.5 | 30 |
| 531 | 5 | 4 | 4 | 5 | 6 | 1   | 20 |
| 531 | 5 | 4 | 3 | 3 | 1 | 1   | 15 |
| 531 | 6 | 7 | 1 | 3 | 6 | 6.5 | 6  |
| 531 | 6 | 6 | 1 | 2 | 4 | 3   | 6  |
| 531 | 6 | 7 | 1 | 2 | 4 | 5   | 6  |
| 531 | 6 | 6 | 1 | 3 | 5 | 3.5 | 6  |
| 531 | 6 | 7 | 5 | 4 | 1 | 5.5 | 30 |
| 531 | 6 | 5 | 5 | 6 | 3 | 5.5 | 30 |
| 531 | 6 | 5 | 5 | 5 | 3 | 6   | 30 |
| 531 | 6 | 6 | 2 | 2 | 4 | 4.5 | 12 |
| 531 | 6 | 7 | 2 | 2 | 2 | 6   | 12 |
| 531 | 6 | 4 | 4 | 5 | 5 | 6   | 24 |
| 531 | 6 | 2 | 2 | 6 | 6 | 5.5 | 12 |
| 531 | 6 | 2 | 2 | 5 | 6 | 4   | 12 |
| 531 | 6 | 1 | 4 | 5 | 5 | 6   | 24 |
| 531 | 4 | 1 | 6 | 7 | 3 | 5   | 24 |
| 531 | 4 | 2 | 3 | 4 | 7 | 3   | 12 |
| 531 | 4 | 1 | 1 | 1 | 6 | 1   | 4  |
| 532 | 4 | 1 | 5 | 7 | 1 | 2   | 20 |
| 532 | 4 | 1 | 5 | 1 | 1 | 2   | 20 |
| 532 | 4 | 1 | 1 | 1 | 1 | 2   | 4  |
| 532 | 1 | 7 | 1 | 1 | 1 | 2   | 1  |
| 532 | 1 | 1 | 1 | 1 | 1 | 2   | 1  |
| 532 | 1 | 5 | 1 | 1 | 1 | 2   | 1  |
| 532 | 1 | 1 | 1 | 1 | 1 | 2   | 1  |
| 532 | 1 | 1 | 5 | 6 | 1 | 2   | 5  |
| 532 | 1 | 1 | 5 | 6 | 1 | 2   | 5  |

brand extension data

|     |   |   |   |   |   |     |    |
|-----|---|---|---|---|---|-----|----|
| 532 | 1 | 1 | 5 | 6 | 1 | 2   | 5  |
| 532 | 1 | 1 | 1 | 6 | 1 | 2   | 1  |
| 532 | 1 | 1 | 1 | 6 | 1 | 2   | 1  |
| 532 | 1 | 1 | 1 | 6 | 1 | 2   | 1  |
| 532 | 1 | 1 | 1 | 7 | 1 | 2   | 1  |
| 532 | 1 | 7 | 1 | 1 | 1 | 2   | 1  |
| 532 | 1 | 1 | 6 | 7 | 1 | 2   | 6  |
| 532 | 7 | 6 | 1 | 7 | 1 | 2   | 7  |
| 532 | 7 | 6 | 1 | 7 | 6 | 2   | 7  |
| 532 | 7 | 1 | 1 | 1 | 1 | 2   | 7  |
| 533 | 5 | 3 | 3 | 6 | 3 | 4.5 | 15 |
| 533 | 5 | 3 | 3 | 3 | 5 | 4   | 15 |
| 533 | 5 | 3 | 1 | 1 | 1 | 2   | 5  |
| 533 | 5 | 6 | 1 | 1 | 5 | 5   | 5  |
| 533 | 5 | 6 | 1 | 1 | 2 | 3   | 5  |
| 533 | 5 | 6 | 1 | 1 | 2 | 4.5 | 5  |
| 533 | 5 | 6 | 1 | 2 | 2 | 4.5 | 5  |
| 533 | 5 | 1 | 2 | 3 | 1 | 3   | 10 |
| 533 | 5 | 1 | 1 | 4 | 3 | 5.5 | 5  |
| 533 | 5 | 1 | 2 | 4 | 2 | 4   | 10 |
| 533 | 6 | 6 | 1 | 2 | 5 | 5   | 6  |
| 533 | 6 | 2 | 1 | 1 | 3 | 3.5 | 6  |
| 533 | 6 | 6 | 2 | 4 | 5 | 5   | 12 |
| 533 | 5 | 1 | 1 | 2 | 5 | 6   | 5  |
| 533 | 5 | 6 | 1 | 1 | 3 | 4   | 5  |
| 533 | 5 | 4 | 2 | 3 | 1 | 5   | 10 |
| 533 | 4 | 6 | 1 | 5 | 1 | 5   | 4  |
| 533 | 4 | 6 | 1 | 3 | 3 | 3.5 | 4  |
| 533 | 4 | 3 | 1 | 2 | 2 | 1.5 | 4  |
| 534 | 3 | 5 | 2 | 6 | 5 | 4.5 | 6  |
| 534 | 3 | 4 | 1 | 2 | 6 | 1   | 3  |
| 534 | 3 | 1 | 1 | 2 | 2 | 1   | 3  |
| 534 | 5 | 5 | 4 | 1 | 5 | 4.5 | 20 |
| 534 | 5 | 3 | 1 | 1 | 6 | 2.5 | 5  |
| 534 | 5 | 6 | 5 | 1 | 6 | 2.5 | 25 |
| 534 | 5 | 4 | 5 | 3 | 6 | 2   | 25 |
| 534 | 7 | 2 | 1 | 3 | 2 | 6   | 7  |
| 534 | 7 | 1 | 2 | 6 | 2 | 7   | 14 |
| 534 | 7 | 5 | 6 | 5 | 3 | 7   | 42 |
| 534 | 7 | 6 | 6 | 5 | 5 | 6.5 | 42 |
| 534 | 7 | 6 | 5 | 2 | 4 | 6   | 35 |
| 534 | 7 | 3 | 5 | 6 | 3 | 4.5 | 35 |
| 534 | 5 | 5 | 6 | 6 | 6 | 5.5 | 30 |
| 534 | 5 | 4 | 5 | 3 | 6 | 5.5 | 25 |
| 534 | 5 | 5 | 2 | 3 | 5 | 4   | 10 |
| 534 | 2 | 6 | 6 | 7 | 1 | 2   | 12 |
| 534 | 2 | 3 | 5 | 5 | 3 | 2   | 10 |
| 534 | 2 | 1 | 2 | 2 | 1 | 2.5 | 4  |
| 535 | 6 | 2 | 5 | 6 | 6 | 3.5 | 30 |
| 535 | 6 | 2 | 3 | 2 | 6 | 2   | 18 |
| 535 | 6 | 2 | 2 | 2 | 1 | 1.5 | 12 |

brand extension data

|     |   |   |   |   |   |     |    |
|-----|---|---|---|---|---|-----|----|
| 535 | 7 | 7 | 2 | 4 | 7 | 6.5 | 14 |
| 535 | 7 | 7 | 2 | 2 | 4 | 3.5 | 14 |
| 535 | 7 | 7 | 2 | 5 | 4 | 4.5 | 14 |
| 535 | 7 | 7 | 2 | 2 | 7 | 5.5 | 14 |
| 535 | 7 | 7 | 5 | 2 | 1 | 3   | 35 |
| 535 | 7 | 3 | 6 | 5 | 3 | 6.5 | 42 |
| 535 | 7 | 5 | 7 | 5 | 3 | 4.5 | 49 |
| 535 | 4 | 5 | 2 | 1 | 2 | 2.5 | 8  |
| 535 | 4 | 2 | 2 | 1 | 2 | 3.5 | 8  |
| 535 | 4 | 2 | 5 | 5 | 6 | 4.5 | 20 |
| 535 | 5 | 2 | 1 | 5 | 7 | 6   | 5  |
| 535 | 5 | 7 | 1 | 3 | 7 | 3   | 5  |
| 535 | 5 | 2 | 1 | 4 | 5 | 3.5 | 5  |
| 535 | 5 | 7 | 5 | 5 | 3 | 3   | 25 |
| 535 | 5 | 7 | 2 | 5 | 7 | 2   | 10 |
| 535 | 5 | 1 | 1 | 1 | 2 | 1.5 | 5  |
| 536 | 7 | 7 | 3 | 1 | 5 | 2   | 21 |
| 536 | 7 | 7 | 4 | 1 | 3 | 2   | 28 |
| 536 | 7 | 7 | 3 | 1 | 6 | 2.5 | 21 |
| 536 | 7 | 7 | 3 | 1 | 2 | 2   | 21 |
| 536 | 7 | 7 | 1 | 7 | 2 | 3.5 | 7  |
| 536 | 7 | 7 | 1 | 7 | 2 | 2   | 7  |
| 536 | 7 | 7 | 1 | 7 | 2 | 3.5 | 7  |
| 536 | 7 | 5 | 6 | 5 | 7 | 3.5 | 42 |
| 536 | 7 | 7 | 2 | 3 | 3 | 3.5 | 14 |
| 536 | 7 | 7 | 1 | 3 | 6 | 6   | 7  |
| 536 | 5 | 7 | 1 | 7 | 7 | 3.5 | 5  |
| 536 | 5 | 7 | 4 | 2 | 4 | 2.5 | 20 |
| 536 | 5 | 7 | 6 | 7 | 7 | 6.5 | 30 |
| 536 | 1 | 4 | 1 | 7 | 1 | 1   | 1  |
| 536 | 1 | 1 | 6 | 1 | 7 | 2.5 | 6  |
| 536 | 1 | 4 | 4 | 1 | 4 | 2.5 | 4  |
| 537 | 7 | 1 | 1 | 7 | 4 | 6.5 | 7  |
| 537 | 7 | 7 | 1 | 4 | 4 | 1   | 7  |
| 537 | 7 | 1 | 7 | 1 | 1 | 1   | 49 |
| 537 | 7 | 7 | 1 | 1 | 5 | 5.5 | 7  |
| 537 | 7 | 1 | 1 | 1 | 2 | 5.5 | 7  |
| 537 | 7 | 7 | 7 | 1 | 3 | 7   | 49 |
| 537 | 7 | 7 | 1 | 3 | 6 | 6.5 | 7  |
| 537 | 7 | 1 | 7 | 2 | 1 | 6.5 | 49 |
| 537 | 7 | 1 | 1 | 5 | 2 | 6.5 | 7  |
| 537 | 7 | 7 | 7 | 6 | 2 | 7   | 49 |
| 537 | 7 | 7 | 1 | 1 | 1 | 7   | 7  |
| 537 | 7 | 1 | 1 | 1 | 1 | 1   | 7  |
| 537 | 7 | 1 | 1 | 6 | 4 | 7   | 7  |
| 537 | 7 | 1 | 1 | 6 | 7 | 7   | 7  |
| 537 | 7 | 7 | 1 | 5 | 6 | 3   | 7  |
| 537 | 7 | 1 | 7 | 3 | 5 | 4.5 | 49 |
| 537 | 7 | 7 | 7 | 6 | 1 | 1.5 | 49 |
| 537 | 7 | 7 | 1 | 4 | 6 | 1   | 7  |
| 537 | 7 | 1 | 1 | 5 | 3 | 1   | 7  |

brand extension data

|     |   |   |   |   |   |     |    |
|-----|---|---|---|---|---|-----|----|
| 538 | 4 | 5 | 4 | 7 | 4 | 3   | 16 |
| 538 | 4 | 5 | 3 | 3 | 5 | 3.5 | 12 |
| 538 | 4 | 3 | 1 | 3 | 2 | 3.5 | 4  |
| 538 | 6 | 4 | 1 | 2 | 3 | 4.5 | 6  |
| 538 | 6 | 5 | 2 | 1 | 2 | 4.5 | 12 |
| 538 | 6 | 4 | 2 | 2 | 4 | 6   | 12 |
| 538 | 6 | 4 | 5 | 3 | 2 | 4   | 30 |
| 538 | 6 | 5 | 5 | 5 | 2 | 5   | 30 |
| 538 | 6 | 5 | 5 | 4 | 2 | 6   | 30 |
| 538 | 6 | 6 | 3 | 2 | 3 | 5.5 | 18 |
| 538 | 6 | 4 | 3 | 2 | 2 | 5.5 | 18 |
| 538 | 6 | 4 | 5 | 5 | 4 | 6.5 | 30 |
| 538 | 6 | 3 | 3 | 6 | 5 | 4   | 18 |
| 538 | 6 | 3 | 3 | 3 | 4 | 4.5 | 18 |
| 538 | 6 | 5 | 5 | 3 | 4 | 5.5 | 30 |
| 538 | 3 | 4 | 5 | 7 | 2 | 4   | 15 |
| 538 | 3 | 4 | 2 | 5 | 7 | 3.5 | 6  |
| 538 | 3 | 4 | 2 | 2 | 4 | 5.5 | 6  |
| 539 | 5 | 7 | 3 | 7 | 4 | 4.5 | 15 |
| 539 | 5 | 4 | 1 | 4 | 6 | 1   | 5  |
| 539 | 5 | 6 | 1 | 1 | 3 | 1   | 5  |
| 539 | 3 | 6 | 1 | 1 | 7 | 4   | 3  |
| 539 | 3 | 5 | 1 | 1 | 4 | 3   | 3  |
| 539 | 3 | 7 | 2 | 2 | 4 | 1.5 | 6  |
| 539 | 3 | 4 | 1 | 2 | 2 | 1.5 | 3  |
| 539 | 7 | 5 | 1 | 1 | 3 | 2.5 | 7  |
| 539 | 7 | 6 | 3 | 3 | 4 | 4.5 | 21 |
| 539 | 7 | 7 | 5 | 6 | 5 | 5.5 | 35 |
| 539 | 7 | 7 | 7 | 7 | 7 | 7   | 49 |
| 539 | 7 | 1 | 1 | 3 | 4 | 1   | 7  |
| 539 | 7 | 6 | 6 | 5 | 6 | 5.5 | 42 |
| 539 | 7 | 4 | 7 | 7 | 7 | 6.5 | 49 |
| 539 | 7 | 7 | 1 | 2 | 6 | 1.5 | 7  |
| 539 | 7 | 6 | 2 | 4 | 5 | 3   | 14 |
| 539 | 4 | 3 | 1 | 5 | 4 | 1   | 4  |
| 539 | 4 | 5 | 4 | 5 | 7 | 1.5 | 16 |
| 539 | 4 | 1 | 1 | 2 | 4 | 1   | 4  |
| 540 | 3 | 3 | 7 | 7 | 4 | 3.5 | 21 |
| 540 | 3 | 1 | 1 | 1 | 4 | 1   | 3  |
| 540 | 3 | 1 | 1 | 1 | 4 | 1   | 3  |
| 540 | 4 | 7 | 1 | 1 | 6 | 1   | 4  |
| 540 | 4 | 4 | 1 | 1 | 5 | 4   | 4  |
| 540 | 4 | 5 | 1 | 1 | 5 | 2   | 4  |
| 540 | 4 | 5 | 1 | 1 | 5 | 3   | 4  |
| 540 | 7 | 1 | 1 | 1 | 4 | 2   | 7  |
| 540 | 7 | 1 | 1 | 2 | 3 | 2   | 7  |
| 540 | 7 | 6 | 7 | 3 | 2 | 6   | 49 |
| 540 | 7 | 7 | 5 | 1 | 3 | 6.5 | 35 |
| 540 | 7 | 7 | 4 | 1 | 1 | 6.5 | 28 |
| 540 | 7 | 7 | 6 | 4 | 5 | 6.5 | 42 |
| 540 | 7 | 1 | 1 | 6 | 6 | 4.5 | 7  |

brand extension data

|     |   |   |   |   |   |     |    |
|-----|---|---|---|---|---|-----|----|
| 540 | 7 | 1 | 1 | 1 | 5 | 1.5 | 7  |
| 540 | 7 | 1 | 7 | 2 | 5 | 1.5 | 49 |
| 540 | 1 | 1 | 1 | 1 | 1 | 2   | 1  |
| 540 | 1 | 1 | 1 | 1 | 5 | 1   | 1  |
| 540 | 1 | 1 | 1 | 1 | 1 | 1   | 1  |
| 541 | 3 | 5 | 3 | 7 | 1 | 3   | 9  |
| 541 | 3 | 4 | 3 | 3 | 4 | 1   | 9  |
| 541 | 3 | 2 | 2 | 1 | 1 | 2.5 | 6  |
| 541 | 6 | 6 | 5 | 1 | 6 | 5.5 | 30 |
| 541 | 6 | 3 | 3 | 1 | 6 | 6   | 18 |
| 541 | 6 | 5 | 5 | 1 | 5 | 6   | 30 |
| 541 | 6 | 5 | 5 | 1 | 6 | 7   | 30 |
| 541 | 5 | 4 | 6 | 5 | 1 | 5.5 | 30 |
| 541 | 5 | 4 | 3 | 5 | 1 | 5   | 15 |
| 541 | 5 | 6 | 6 | 5 | 1 | 6.5 | 30 |
| 541 | 6 | 6 | 6 | 3 | 6 | 6.5 | 36 |
| 541 | 6 | 7 | 7 | 1 | 1 | 7   | 42 |
| 541 | 6 | 7 | 7 | 6 | 4 | 7   | 42 |
| 541 | 6 | 3 | 3 | 5 | 3 | 6.5 | 18 |
| 541 | 6 | 2 | 3 | 3 | 5 | 7   | 18 |
| 541 | 6 | 2 | 3 | 4 | 3 | 6   | 18 |
| 541 | 2 | 6 | 7 | 5 | 1 | 1   | 14 |
| 541 | 2 | 4 | 5 | 5 | 4 | 4.5 | 10 |
| 541 | 2 | 5 | 5 | 5 | 4 | 3.5 | 10 |
| 542 | 4 | 1 | 1 | 5 | 2 | 1   | 4  |
| 542 | 4 | 1 | 1 | 1 | 5 | 1   | 4  |
| 542 | 4 | 3 | 3 | 1 | 3 | 2   | 12 |
| 542 | 6 | 7 | 5 | 1 | 6 | 3.5 | 30 |
| 542 | 6 | 4 | 3 | 1 | 3 | 2.5 | 18 |
| 542 | 6 | 7 | 5 | 1 | 2 | 4.5 | 30 |
| 542 | 6 | 6 | 6 | 1 | 6 | 2.5 | 36 |
| 542 | 7 | 3 | 4 | 2 | 3 | 4.5 | 28 |
| 542 | 7 | 2 | 2 | 5 | 3 | 5   | 14 |
| 542 | 7 | 4 | 5 | 4 | 2 | 6   | 35 |
| 542 | 7 | 7 | 6 | 1 | 5 | 6   | 42 |
| 542 | 7 | 7 | 2 | 1 | 3 | 5   | 14 |
| 542 | 7 | 4 | 6 | 3 | 5 | 7   | 42 |
| 542 | 6 | 2 | 4 | 6 | 6 | 5.5 | 24 |
| 542 | 6 | 3 | 3 | 2 | 2 | 2.5 | 18 |
| 542 | 6 | 4 | 4 | 3 | 4 | 3.5 | 24 |
| 542 | 1 | 7 | 7 | 7 | 1 | 1   | 7  |
| 542 | 1 | 7 | 7 | 7 | 1 | 1   | 7  |
| 542 | 1 | 1 | 1 | 2 | 3 | 1   | 1  |
| 543 | 6 | 4 | 1 | 6 | 3 | 1.5 | 6  |
| 543 | 6 | 2 | 1 | 2 | 5 | 1.5 | 6  |
| 543 | 6 | 1 | 1 | 3 | 1 | 2   | 6  |
| 543 | 6 | 6 | 1 | 2 | 4 | 3   | 6  |
| 543 | 6 | 3 | 1 | 2 | 2 | 1.5 | 6  |
| 543 | 6 | 5 | 1 | 2 | 3 | 2   | 6  |
| 543 | 6 | 5 | 1 | 1 | 5 | 1.5 | 6  |
| 543 | 6 | 5 | 1 | 4 | 1 | 3   | 6  |

brand extension data

|     |   |   |   |   |   |     |    |
|-----|---|---|---|---|---|-----|----|
| 543 | 6 | 4 | 3 | 4 | 1 | 2   | 18 |
| 543 | 6 | 6 | 6 | 4 | 1 | 5   | 36 |
| 543 | 6 | 6 | 4 | 1 | 4 | 3   | 24 |
| 543 | 6 | 6 | 2 | 1 | 1 | 2.5 | 12 |
| 543 | 6 | 6 | 2 | 2 | 3 | 4.5 | 12 |
| 543 | 6 | 1 | 1 | 5 | 4 | 3   | 6  |
| 543 | 6 | 3 | 1 | 1 | 4 | 2.5 | 6  |
| 543 | 6 | 3 | 1 | 3 | 4 | 4.5 | 6  |
| 543 | 4 | 6 | 5 | 7 | 1 | 3   | 20 |
| 543 | 4 | 5 | 1 | 1 | 3 | 2   | 4  |
| 543 | 4 | 1 | 1 | 1 | 1 | 3   | 4  |
| 545 | 6 | 6 | 7 | 7 | 4 | 5   | 42 |
| 545 | 6 | 2 | 2 | 2 | 4 | 1   | 12 |
| 545 | 6 | 6 | 1 | 1 | 1 | 1   | 6  |
| 545 | 7 | 7 | 1 | 1 | 5 | 5.5 | 7  |
| 545 | 7 | 7 | 1 | 1 | 5 | 3   | 7  |
| 545 | 7 | 7 | 1 | 1 | 3 | 5.5 | 7  |
| 545 | 7 | 7 | 1 | 1 | 5 | 3.5 | 7  |
| 545 | 5 | 1 | 1 | 2 | 1 | 2   | 5  |
| 545 | 5 | 1 | 3 | 4 | 2 | 4   | 15 |
| 545 | 5 | 6 | 3 | 3 | 2 | 6   | 15 |
| 545 | 7 | 7 | 1 | 1 | 1 | 3.5 | 7  |
| 545 | 7 | 7 | 1 | 1 | 2 | 4.5 | 7  |
| 545 | 7 | 2 | 5 | 1 | 4 | 5   | 35 |
| 545 | 7 | 4 | 1 | 5 | 7 | 7   | 7  |
| 545 | 7 | 1 | 1 | 3 | 6 | 1.5 | 7  |
| 545 | 7 | 1 | 1 | 2 | 3 | 5   | 7  |
| 545 | 5 | 1 | 1 | 5 | 1 | 3   | 5  |
| 545 | 5 | 7 | 4 | 6 | 7 | 2   | 20 |
| 545 | 5 | 1 | 1 | 1 | 3 | 1   | 5  |
| 546 | 7 | 7 | 5 | 4 | 1 | 4   | 35 |
| 546 | 7 | 1 | 3 | 3 | 1 | 3.5 | 21 |
| 546 | 7 | 2 | 4 | 4 | 1 | 2.5 | 28 |
| 546 | 7 | 2 | 6 | 4 | 3 | 3.5 | 42 |
| 546 | 7 | 4 | 1 | 4 | 3 | 5.5 | 7  |
| 546 | 7 | 3 | 5 | 1 | 2 | 5   | 35 |
| 546 | 7 | 7 | 5 | 3 | 1 | 5   | 35 |
| 546 | 7 | 1 | 3 | 4 | 1 | 4.5 | 21 |
| 546 | 7 | 4 | 4 | 3 | 4 | 4   | 28 |
| 546 | 7 | 4 | 5 | 3 | 3 | 3.5 | 35 |
| 546 | 7 | 4 | 3 | 5 | 4 | 2   | 21 |
| 546 | 7 | 5 | 4 | 2 | 1 | 4   | 28 |
| 546 | 7 | 1 | 4 | 3 | 1 | 3.5 | 28 |
| 546 | 7 | 4 | 3 | 4 | 2 | 4   | 21 |
| 546 | 7 | 2 | 3 | 3 | 4 | 3   | 21 |
| 546 | 7 | 5 | 4 | 4 | 3 | 4.5 | 28 |
| 546 | 7 | 3 | 3 | 5 | 2 | 3   | 21 |
| 546 | 7 | 5 | 4 | 3 | 1 | 4   | 28 |
| 546 | 7 | 4 | 3 | 3 | 3 | 4.5 | 21 |
| 547 | 7 | 1 | 5 | 7 | 1 | 6   | 35 |
| 547 | 7 | 1 | 1 | 4 | 1 | 5.5 | 7  |

brand extension data

|     |   |   |   |   |   |     |    |
|-----|---|---|---|---|---|-----|----|
| 547 | 7 | 4 | 1 | 5 | 2 | 4   | 7  |
| 547 | 7 | 1 | 1 | 5 | 2 | 5   | 7  |
| 547 | 7 | 1 | 6 | 6 | 7 | 4.5 | 42 |
| 547 | 7 | 7 | 7 | 7 | 2 | 5   | 49 |
| 547 | 7 | 7 | 1 | 7 | 2 | 5.5 | 7  |
| 547 | 7 | 1 | 5 | 7 | 1 | 6.5 | 35 |
| 547 | 7 | 1 | 6 | 7 | 1 | 1   | 42 |
| 547 | 7 | 1 | 6 | 5 | 1 | 1   | 42 |
| 547 | 7 | 1 | 4 | 6 | 5 | 1   | 28 |
| 547 | 7 | 1 | 1 | 7 | 1 | 7   | 7  |
| 547 | 7 | 6 | 1 | 5 | 2 | 6.5 | 7  |
| 547 | 7 | 1 | 1 | 5 | 1 | 5   | 7  |
| 547 | 7 | 7 | 6 | 5 | 1 | 4   | 42 |
| 547 | 7 | 7 | 7 | 7 | 1 | 1   | 49 |
| 547 | 7 | 7 | 3 | 6 | 1 | 3   | 21 |
| 547 | 7 | 1 | 1 | 7 | 2 | 5.5 | 7  |
| 547 | 7 | 7 | 1 | 7 | 1 | 3   | 7  |
| 548 | 7 | 1 | 5 | 1 | 4 | 2   | 35 |
| 548 | 1 | 1 | 5 | 3 | 1 | 2.5 | 5  |
| 548 | 7 | 1 | 4 | 4 | 4 | 1.5 | 28 |
| 548 | 6 | 5 | 5 | 4 | 1 | 1.5 | 30 |
| 548 | 7 | 7 | 7 | 2 | 1 | 5   | 49 |
| 548 | 5 | 1 | 5 | 2 | 7 | 5.5 | 25 |
| 548 | 7 | 4 | 5 | 1 | 1 | 5   | 35 |
| 548 | 1 | 1 | 1 | 2 | 1 | 5   | 1  |
| 548 | 7 | 1 | 2 | 1 | 1 | 4   | 14 |
| 548 | 6 | 4 | 5 | 3 | 4 | 3   | 30 |
| 548 | 7 | 7 | 6 | 2 | 1 | 3   | 42 |
| 548 | 5 | 5 | 1 | 4 | 1 | 5.5 | 5  |
| 548 | 7 | 4 | 1 | 4 | 4 | 2.5 | 7  |
| 548 | 1 | 1 | 5 | 1 | 1 | 2.5 | 5  |
| 548 | 7 | 1 | 2 | 1 | 4 | 2.5 | 14 |
| 548 | 6 | 4 | 3 | 4 | 7 | 4   | 18 |
| 548 | 7 | 1 | 7 | 2 | 7 | 3.5 | 49 |
| 548 | 5 | 5 | 7 | 7 | 1 | 3.5 | 35 |
| 548 | 7 | 1 | 5 | 1 | 4 | 7   | 35 |
| 549 | 7 | 1 | 7 | 1 | 1 | 4   | 49 |
| 549 | 7 | 3 | 6 | 1 | 1 | 4   | 42 |
| 549 | 7 | 3 | 4 | 4 | 1 | 5   | 28 |
| 549 | 7 | 4 | 3 | 1 | 1 | 3.5 | 21 |
| 549 | 7 | 5 | 3 | 3 | 7 | 5   | 21 |
| 549 | 6 | 5 | 5 | 1 | 1 | 4.5 | 30 |
| 549 | 7 | 1 | 6 | 1 | 1 | 4   | 42 |
| 549 | 7 | 1 | 6 | 3 | 1 | 5   | 42 |
| 549 | 7 | 2 | 1 | 4 | 1 | 2   | 7  |
| 549 | 7 | 6 | 1 | 1 | 1 | 3   | 7  |
| 549 | 7 | 5 | 3 | 1 | 3 | 5.5 | 21 |
| 549 | 6 | 5 | 5 | 1 | 1 | 4   | 30 |
| 549 | 7 | 3 | 5 | 3 | 1 | 3.5 | 35 |
| 549 | 7 | 3 | 5 | 1 | 1 | 6.5 | 35 |
| 549 | 7 | 4 | 3 | 1 | 1 | 3.5 | 21 |

brand extension data

|     |   |   |   |   |   |     |    |
|-----|---|---|---|---|---|-----|----|
| 549 | 7 | 5 | 1 | 4 | 1 | 3.5 | 7  |
| 549 | 7 | 4 | 4 | 1 | 1 | 2.5 | 28 |
| 549 | 6 | 7 | 1 | 1 | 2 | 3   | 6  |
| 549 | 7 | 1 | 1 | 3 | 1 | 6   | 7  |
| 550 | 7 | 5 | 6 | 3 | 1 | 3.5 | 42 |
| 550 | 7 | 1 | 4 | 5 | 1 | 4.5 | 28 |
| 550 | 7 | 7 | 3 | 1 | 1 | 2   | 21 |
| 550 | 7 | 1 | 5 | 6 | 1 | 3   | 35 |
| 550 | 7 | 7 | 5 | 2 | 7 | 4   | 35 |
| 550 | 2 | 4 | 2 | 4 | 1 | 3   | 4  |
| 550 | 7 | 5 | 6 | 2 | 1 | 3   | 42 |
| 550 | 7 | 1 | 5 | 2 | 1 | 2   | 35 |
| 550 | 7 | 5 | 1 | 1 | 1 | 3.5 | 7  |
| 550 | 7 | 1 | 5 | 4 | 1 | 2.5 | 35 |
| 550 | 7 | 4 | 5 | 5 | 1 | 4   | 35 |
| 550 | 2 | 4 | 2 | 4 | 1 | 3   | 4  |
| 550 | 7 | 1 | 5 | 5 | 1 | 3.5 | 35 |
| 550 | 7 | 7 | 5 | 7 | 1 | 4   | 35 |
| 550 | 7 | 5 | 1 | 7 | 1 | 5   | 7  |
| 550 | 7 | 7 | 4 | 4 | 1 | 3.5 | 28 |
| 550 | 7 | 4 | 4 | 1 | 1 | 3   | 28 |
| 550 | 2 | 1 | 7 | 1 | 3 | 3.5 | 14 |
| 550 | 7 | 7 | 4 | 1 | 1 | 6.5 | 28 |
| 551 | 3 | 7 | 1 | 7 | 1 | 1.5 | 3  |
| 551 | 7 | 1 | 1 | 4 | 4 | 4   | 7  |
| 551 | 7 | 7 | 7 | 4 | 1 | 4.5 | 49 |
| 551 | 4 | 4 | 1 | 2 | 1 | 2.5 | 4  |
| 551 | 7 | 4 | 5 | 7 | 5 | 4   | 35 |
| 551 | 2 | 4 | 7 | 6 | 2 | 7   | 14 |
| 551 | 3 | 7 | 1 | 7 | 3 | 4.5 | 3  |
| 551 | 7 | 1 | 1 | 3 | 3 | 2.5 | 7  |
| 551 | 7 | 4 | 4 | 7 | 1 | 7   | 28 |
| 551 | 4 | 1 | 3 | 2 | 1 | 5   | 12 |
| 551 | 7 | 1 | 1 | 5 | 6 | 6.5 | 7  |
| 551 | 2 | 1 | 1 | 2 | 4 | 3   | 2  |
| 551 | 3 | 4 | 1 | 1 | 1 | 2.5 | 3  |
| 551 | 7 | 7 | 1 | 4 | 2 | 4   | 7  |
| 551 | 7 | 7 | 7 | 3 | 1 | 6   | 49 |
| 551 | 4 | 7 | 7 | 7 | 3 | 3   | 28 |
| 551 | 7 | 4 | 7 | 3 | 5 | 7   | 49 |
| 551 | 2 | 1 | 1 | 1 | 6 | 2.5 | 2  |
| 551 | 3 | 7 | 1 | 6 | 4 | 5.5 | 3  |
| 552 | 5 | 6 | 2 | 6 | 5 | 2   | 10 |
| 552 | 4 | 4 | 2 | 5 | 5 | 3   | 8  |
| 552 | 5 | 3 | 6 | 3 | 3 | 1.5 | 30 |
| 552 | 5 | 5 | 2 | 4 | 4 | 3.5 | 10 |
| 552 | 6 | 4 | 4 | 6 | 6 | 6   | 24 |
| 552 | 5 | 4 | 3 | 5 | 3 | 6.5 | 15 |
| 552 | 5 | 6 | 6 | 5 | 6 | 2   | 30 |
| 552 | 4 | 4 | 2 | 3 | 4 | 3   | 8  |
| 552 | 5 | 2 | 2 | 2 | 2 | 2   | 10 |

brand extension data

|     |   |   |   |   |   |     |    |
|-----|---|---|---|---|---|-----|----|
| 552 | 5 | 4 | 2 | 4 | 2 | 3.5 | 10 |
| 552 | 6 | 6 | 3 | 6 | 6 | 6   | 18 |
| 552 | 5 | 6 | 6 | 4 | 7 | 5.5 | 30 |
| 552 | 5 | 6 | 2 | 4 | 3 | 2   | 10 |
| 552 | 4 | 5 | 2 | 6 | 4 | 6   | 8  |
| 552 | 5 | 5 | 6 | 5 | 3 | 4.5 | 30 |
| 552 | 5 | 6 | 6 | 6 | 6 | 4   | 30 |
| 552 | 6 | 3 | 4 | 3 | 5 | 2   | 24 |
| 552 | 5 | 2 | 2 | 3 | 5 | 2   | 10 |
| 552 | 5 | 3 | 2 | 4 | 5 | 6   | 10 |
| 553 | 5 | 5 | 6 | 6 | 4 | 5.5 | 30 |
| 553 | 6 | 5 | 1 | 1 | 5 | 4.5 | 6  |
| 553 | 5 | 3 | 5 | 2 | 2 | 4   | 25 |
| 553 | 5 | 2 | 2 | 1 | 3 | 5   | 10 |
| 553 | 6 | 2 | 2 | 3 | 6 | 4.5 | 12 |
| 553 | 4 | 7 | 6 | 4 | 2 | 4.5 | 24 |
| 553 | 5 | 6 | 2 | 2 | 3 | 1   | 10 |
| 553 | 6 | 5 | 2 | 1 | 2 | 4.5 | 12 |
| 553 | 5 | 1 | 2 | 3 | 3 | 1.5 | 10 |
| 553 | 5 | 2 | 3 | 1 | 2 | 3.5 | 15 |
| 553 | 6 | 4 | 2 | 2 | 6 | 5   | 12 |
| 553 | 4 | 5 | 2 | 1 | 7 | 3.5 | 8  |
| 553 | 5 | 6 | 1 | 1 | 2 | 1.5 | 5  |
| 553 | 6 | 5 | 4 | 2 | 4 | 6   | 24 |
| 553 | 5 | 5 | 3 | 4 | 2 | 2   | 15 |
| 553 | 6 | 2 | 5 | 1 | 5 | 3.5 | 30 |
| 553 | 4 | 1 | 1 | 1 | 3 | 1.5 | 4  |
| 553 | 5 | 5 | 3 | 2 | 6 | 5   | 15 |
| 554 | 3 | 7 | 7 | 7 | 3 | 2   | 21 |
| 554 | 5 | 7 | 1 | 2 | 5 | 6   | 5  |
| 554 | 5 | 1 | 2 | 2 | 2 | 5.5 | 10 |
| 554 | 6 | 6 | 1 | 2 | 5 | 6.5 | 6  |
| 554 | 7 | 1 | 1 | 6 | 6 | 3.5 | 7  |
| 554 | 4 | 1 | 1 | 7 | 1 | 1.5 | 4  |
| 554 | 3 | 7 | 1 | 6 | 5 | 5   | 3  |
| 554 | 5 | 4 | 6 | 2 | 2 | 3   | 30 |
| 554 | 5 | 1 | 1 | 5 | 2 | 3   | 5  |
| 554 | 6 | 2 | 1 | 2 | 2 | 6   | 6  |
| 554 | 7 | 7 | 5 | 4 | 6 | 6   | 35 |
| 554 | 4 | 7 | 1 | 1 | 7 | 5.5 | 4  |
| 554 | 3 | 7 | 1 | 2 | 2 | 2   | 3  |
| 554 | 5 | 7 | 6 | 2 | 3 | 5.5 | 30 |
| 554 | 5 | 6 | 6 | 4 | 2 | 5.5 | 30 |
| 554 | 6 | 6 | 6 | 6 | 4 | 6   | 36 |
| 554 | 7 | 1 | 4 | 3 | 3 | 6   | 28 |
| 554 | 4 | 1 | 1 | 1 | 5 | 2.5 | 4  |
| 554 | 3 | 7 | 6 | 2 | 4 | 5.5 | 18 |
| 555 | 5 | 6 | 6 | 6 | 2 | 4.5 | 30 |
| 555 | 4 | 3 | 2 | 4 | 4 | 3.5 | 8  |
| 555 | 4 | 4 | 4 | 2 | 1 | 4   | 16 |
| 555 | 1 | 1 | 2 | 2 | 2 | 1.5 | 2  |

brand extension data

|     |   |   |   |   |   |     |    |
|-----|---|---|---|---|---|-----|----|
| 555 | 7 | 3 | 2 | 4 | 5 | 3.5 | 14 |
| 555 | 3 | 5 | 4 | 5 | 2 | 4.5 | 12 |
| 555 | 5 | 5 | 3 | 5 | 2 | 2   | 15 |
| 555 | 4 | 3 | 2 | 2 | 3 | 2   | 8  |
| 555 | 4 | 2 | 2 | 3 | 2 | 4.5 | 8  |
| 555 | 1 | 1 | 1 | 2 | 2 | 1   | 1  |
| 555 | 7 | 2 | 2 | 4 | 5 | 2.5 | 14 |
| 555 | 3 | 2 | 2 | 2 | 2 | 3   | 6  |
| 555 | 5 | 2 | 2 | 3 | 1 | 2   | 10 |
| 555 | 4 | 4 | 3 | 4 | 2 | 5   | 12 |
| 555 | 4 | 6 | 6 | 6 | 1 | 6   | 24 |
| 555 | 1 | 5 | 5 | 5 | 2 | 1.5 | 5  |
| 555 | 7 | 3 | 3 | 3 | 3 | 3   | 21 |
| 555 | 3 | 1 | 1 | 1 | 3 | 2   | 3  |
| 555 | 5 | 2 | 2 | 3 | 3 | 3.5 | 10 |
| 556 | 5 | 4 | 1 | 7 | 6 | 3   | 5  |
| 556 | 4 | 6 | 1 | 1 | 5 | 3.5 | 4  |
| 556 | 5 | 2 | 2 | 1 | 1 | 2.5 | 10 |
| 556 | 6 | 5 | 1 | 1 | 4 | 6.5 | 6  |
| 556 | 7 | 4 | 1 | 6 | 6 | 6   | 7  |
| 556 | 4 | 4 | 6 | 6 | 5 | 4.5 | 24 |
| 556 | 5 | 5 | 1 | 4 | 7 | 2.5 | 5  |
| 556 | 4 | 5 | 1 | 2 | 2 | 3   | 4  |
| 556 | 5 | 2 | 1 | 5 | 3 | 4.5 | 5  |
| 556 | 6 | 3 | 1 | 1 | 3 | 5   | 6  |
| 556 | 7 | 5 | 1 | 2 | 6 | 5   | 7  |
| 556 | 4 | 5 | 1 | 2 | 7 | 6   | 4  |
| 556 | 5 | 4 | 1 | 1 | 1 | 2.5 | 5  |
| 556 | 4 | 5 | 1 | 3 | 1 | 5   | 4  |
| 556 | 5 | 3 | 4 | 5 | 4 | 6.5 | 20 |
| 556 | 6 | 3 | 5 | 5 | 6 | 7   | 30 |
| 556 | 7 | 5 | 4 | 2 | 7 | 3   | 28 |
| 556 | 4 | 1 | 1 | 1 | 4 | 3   | 4  |
| 556 | 5 | 5 | 1 | 3 | 5 | 3.5 | 5  |
| 557 | 7 | 7 | 7 | 7 | 4 | 7   | 49 |
| 557 | 5 | 7 | 1 | 2 | 3 | 5.5 | 5  |
| 557 | 6 | 6 | 3 | 3 | 2 | 5.5 | 18 |
| 557 | 7 | 3 | 3 | 3 | 2 | 6   | 21 |
| 557 | 7 | 7 | 7 | 7 | 7 | 7   | 49 |
| 557 | 3 | 5 | 6 | 7 | 3 | 4   | 18 |
| 557 | 7 | 7 | 7 | 6 | 6 | 7   | 49 |
| 557 | 5 | 1 | 2 | 2 | 1 | 5.5 | 10 |
| 557 | 6 | 2 | 2 | 1 | 2 | 2   | 12 |
| 557 | 7 | 2 | 3 | 3 | 2 | 7   | 21 |
| 557 | 7 | 6 | 5 | 5 | 7 | 7   | 35 |
| 557 | 3 | 7 | 1 | 2 | 7 | 7   | 3  |
| 557 | 7 | 7 | 4 | 2 | 2 | 3.5 | 28 |
| 557 | 5 | 7 | 3 | 4 | 3 | 4   | 15 |
| 557 | 6 | 6 | 6 | 6 | 2 | 7   | 36 |
| 557 | 7 | 7 | 6 | 7 | 6 | 6.5 | 42 |
| 557 | 7 | 2 | 7 | 3 | 5 | 7   | 49 |

brand extension data

|     |   |   |   |   |   |     |    |
|-----|---|---|---|---|---|-----|----|
| 557 | 3 | 1 | 1 | 1 | 7 | 1   | 3  |
| 557 | 7 | 5 | 2 | 4 | 5 | 4.5 | 14 |
| 558 | 5 | 7 | 7 | 7 | 7 | 4.5 | 35 |
| 558 | 6 | 7 | 1 | 1 | 5 | 3   | 6  |
| 558 | 7 | 1 | 1 | 1 | 1 | 2.5 | 7  |
| 558 | 4 | 1 | 1 | 1 | 3 | 2   | 4  |
| 558 | 6 | 1 | 1 | 7 | 7 | 3.5 | 6  |
| 558 | 1 | 1 | 1 | 5 | 2 | 1   | 1  |
| 558 | 5 | 7 | 1 | 7 | 2 | 1   | 5  |
| 558 | 6 | 2 | 1 | 1 | 4 | 1   | 6  |
| 558 | 7 | 1 | 1 | 6 | 1 | 1   | 7  |
| 558 | 4 | 1 | 1 | 1 | 1 | 1   | 4  |
| 558 | 6 | 7 | 1 | 2 | 7 | 1   | 6  |
| 558 | 1 | 1 | 1 | 1 | 7 | 1   | 1  |
| 558 | 5 | 7 | 1 | 1 | 1 | 1   | 5  |
| 558 | 6 | 7 | 4 | 3 | 4 | 4.5 | 24 |
| 558 | 7 | 7 | 7 | 6 | 1 | 6   | 49 |
| 558 | 4 | 1 | 1 | 4 | 1 | 2.5 | 4  |
| 558 | 6 | 1 | 1 | 7 | 7 | 2   | 6  |
| 558 | 1 | 1 | 1 | 1 | 6 | 1   | 1  |
| 558 | 5 | 7 | 1 | 2 | 7 | 1   | 5  |
| 559 | 5 | 1 | 6 | 7 | 4 | 3   | 30 |
| 559 | 4 | 7 | 2 | 2 | 6 | 2.5 | 8  |
| 559 | 5 | 2 | 3 | 4 | 2 | 3   | 15 |
| 559 | 6 | 5 | 1 | 2 | 3 | 2   | 6  |
| 559 | 7 | 1 | 6 | 6 | 7 | 3.5 | 42 |
| 559 | 5 | 2 | 5 | 6 | 4 | 4   | 25 |
| 559 | 5 | 1 | 1 | 6 | 6 | 4   | 5  |
| 559 | 4 | 4 | 1 | 2 | 5 | 2   | 4  |
| 559 | 5 | 2 | 3 | 6 | 2 | 5   | 15 |
| 559 | 6 | 4 | 1 | 2 | 3 | 2   | 6  |
| 559 | 7 | 4 | 1 | 5 | 6 | 1.5 | 7  |
| 559 | 5 | 6 | 1 | 2 | 7 | 2   | 5  |
| 559 | 5 | 7 | 1 | 2 | 2 | 1.5 | 5  |
| 559 | 4 | 7 | 1 | 2 | 5 | 2   | 4  |
| 559 | 5 | 1 | 6 | 6 | 2 | 5   | 30 |
| 559 | 6 | 1 | 6 | 6 | 6 | 5.5 | 36 |
| 559 | 7 | 3 | 2 | 5 | 5 | 2   | 14 |
| 559 | 5 | 6 | 1 | 2 | 7 | 2   | 5  |
| 559 | 5 | 5 | 1 | 2 | 7 | 2   | 5  |
| 560 | 5 | 5 | 6 | 6 | 5 | 5   | 30 |
| 560 | 4 | 4 | 3 | 5 | 4 | 4   | 12 |
| 560 | 6 | 5 | 3 | 4 | 4 | 4.5 | 18 |
| 560 | 5 | 5 | 4 | 3 | 4 | 4   | 20 |
| 560 | 6 | 3 | 4 | 5 | 6 | 5   | 24 |
| 560 | 4 | 4 | 5 | 6 | 3 | 5   | 20 |
| 560 | 5 | 5 | 5 | 4 | 5 | 5.5 | 25 |
| 560 | 4 | 3 | 2 | 3 | 4 | 2   | 8  |
| 560 | 6 | 5 | 3 | 4 | 4 | 4.5 | 18 |
| 560 | 5 | 4 | 2 | 3 | 4 | 3   | 10 |
| 560 | 6 | 4 | 4 | 5 | 6 | 2   | 24 |

brand extension data

|     |   |   |   |   |   |     |    |
|-----|---|---|---|---|---|-----|----|
| 560 | 4 | 4 | 2 | 2 | 4 | 2   | 8  |
| 560 | 5 | 3 | 3 | 2 | 4 | 3   | 15 |
| 560 | 4 | 5 | 2 | 6 | 4 | 3   | 8  |
| 560 | 6 | 6 | 4 | 5 | 4 | 5   | 24 |
| 560 | 5 | 5 | 5 | 5 | 5 | 4   | 25 |
| 560 | 6 | 3 | 3 | 4 | 4 | 5   | 18 |
| 560 | 4 | 3 | 3 | 2 | 2 | 2.5 | 12 |
| 560 | 5 | 5 | 2 | 5 | 5 | 3   | 10 |
| 561 | 5 | 1 | 1 | 7 | 4 | 3.5 | 5  |
| 561 | 4 | 6 | 2 | 2 | 6 | 3   | 8  |
| 561 | 5 | 2 | 7 | 4 | 1 | 5.5 | 35 |
| 561 | 5 | 3 | 4 | 3 | 2 | 5.5 | 20 |
| 561 | 5 | 4 | 5 | 6 | 6 | 6.5 | 25 |
| 561 | 3 | 4 | 5 | 6 | 1 | 4   | 15 |
| 561 | 5 | 1 | 2 | 7 | 5 | 4   | 10 |
| 561 | 4 | 5 | 2 | 3 | 3 | 5   | 8  |
| 561 | 5 | 2 | 5 | 4 | 2 | 6   | 25 |
| 561 | 5 | 3 | 4 | 2 | 1 | 6   | 20 |
| 561 | 3 | 6 | 3 | 1 | 7 | 3.5 | 9  |
| 561 | 5 | 6 | 2 | 3 | 1 | 4.5 | 10 |
| 561 | 4 | 5 | 2 | 4 | 3 | 4   | 8  |
| 561 | 5 | 6 | 5 | 4 | 2 | 6   | 25 |
| 561 | 5 | 5 | 6 | 6 | 5 | 3   | 30 |
| 561 | 5 | 6 | 4 | 5 | 5 | 6.5 | 20 |
| 561 | 3 | 5 | 3 | 3 | 5 | 1.5 | 9  |
| 561 | 5 | 5 | 4 | 4 | 5 | 4.5 | 20 |
| 562 | 6 | 6 | 6 | 7 | 3 | 6   | 36 |
| 562 | 6 | 1 | 1 | 2 | 4 | 6   | 6  |
| 562 | 7 | 3 | 4 | 1 | 1 | 5.5 | 28 |
| 562 | 4 | 1 | 2 | 2 | 2 | 4   | 8  |
| 562 | 7 | 4 | 4 | 5 | 6 | 7   | 28 |
| 562 | 4 | 2 | 5 | 6 | 1 | 5   | 20 |
| 562 | 6 | 6 | 2 | 6 | 5 | 4.5 | 12 |
| 562 | 6 | 1 | 2 | 1 | 3 | 6   | 12 |
| 562 | 7 | 4 | 3 | 4 | 1 | 5.5 | 21 |
| 562 | 4 | 1 | 1 | 1 | 2 | 4   | 4  |
| 562 | 7 | 1 | 2 | 4 | 5 | 7   | 14 |
| 562 | 4 | 1 | 1 | 1 | 7 | 7   | 4  |
| 562 | 6 | 2 | 1 | 1 | 1 | 2.5 | 6  |
| 562 | 6 | 1 | 2 | 3 | 3 | 6   | 12 |
| 562 | 7 | 6 | 6 | 6 | 1 | 7   | 42 |
| 562 | 4 | 6 | 6 | 6 | 2 | 4   | 24 |
| 562 | 7 | 4 | 4 | 2 | 4 | 7   | 28 |
| 562 | 4 | 1 | 1 | 1 | 5 | 3   | 4  |
| 562 | 6 | 1 | 4 | 3 | 5 | 6.5 | 24 |
| 563 | 4 | 7 | 6 | 7 | 3 | 4   | 24 |
| 563 | 4 | 5 | 1 | 1 | 5 | 4   | 4  |
| 563 | 6 | 3 | 4 | 1 | 1 | 3.5 | 24 |
| 563 | 5 | 5 | 2 | 3 | 3 | 5   | 10 |
| 563 | 7 | 1 | 3 | 6 | 7 | 6   | 21 |
| 563 | 3 | 2 | 6 | 6 | 1 | 6.5 | 18 |

brand extension data

|     |   |   |   |   |   |     |    |
|-----|---|---|---|---|---|-----|----|
| 563 | 4 | 6 | 3 | 5 | 4 | 4.5 | 12 |
| 563 | 4 | 2 | 3 | 1 | 2 | 4   | 12 |
| 563 | 6 | 2 | 2 | 6 | 1 | 6   | 12 |
| 563 | 5 | 2 | 1 | 1 | 3 | 3.5 | 5  |
| 563 | 7 | 7 | 4 | 3 | 7 | 2.5 | 28 |
| 563 | 3 | 6 | 1 | 1 | 6 | 5.5 | 3  |
| 563 | 4 | 6 | 2 | 1 | 1 | 3.5 | 8  |
| 563 | 4 | 2 | 3 | 2 | 3 | 5.5 | 12 |
| 563 | 6 | 5 | 6 | 4 | 2 | 5.5 | 36 |
| 563 | 5 | 6 | 6 | 5 | 4 | 5   | 30 |
| 563 | 7 | 2 | 5 | 2 | 5 | 3   | 35 |
| 563 | 3 | 1 | 1 | 1 | 6 | 2   | 3  |
| 563 | 4 | 2 | 5 | 3 | 6 | 3.5 | 20 |
| 564 | 7 | 7 | 7 | 7 | 4 | 6   | 49 |
| 564 | 6 | 5 | 3 | 4 | 5 | 5   | 18 |
| 564 | 6 | 6 | 6 | 3 | 3 | 3.5 | 36 |
| 564 | 6 | 5 | 3 | 2 | 3 | 3.5 | 18 |
| 564 | 7 | 7 | 5 | 5 | 6 | 5.5 | 35 |
| 564 | 3 | 6 | 6 | 6 | 2 | 1.5 | 18 |
| 564 | 7 | 7 | 5 | 6 | 6 | 4   | 35 |
| 564 | 6 | 6 | 2 | 1 | 5 | 4.5 | 12 |
| 564 | 6 | 4 | 4 | 3 | 3 | 3.5 | 24 |
| 564 | 6 | 6 | 2 | 1 | 3 | 4   | 12 |
| 564 | 7 | 6 | 4 | 5 | 6 | 5   | 28 |
| 564 | 3 | 6 | 2 | 1 | 7 | 1.5 | 6  |
| 564 | 7 | 7 | 1 | 1 | 3 | 1.5 | 7  |
| 564 | 6 | 5 | 3 | 6 | 5 | 5.5 | 18 |
| 564 | 6 | 6 | 7 | 6 | 2 | 6.5 | 42 |
| 564 | 6 | 7 | 7 | 7 | 5 | 5.5 | 42 |
| 564 | 7 | 6 | 3 | 2 | 5 | 4   | 21 |
| 564 | 3 | 5 | 1 | 1 | 6 | 2.5 | 3  |
| 564 | 7 | 5 | 4 | 4 | 5 | 3   | 28 |
| 565 | 5 | 7 | 7 | 7 | 3 | 5   | 35 |
| 565 | 5 | 6 | 2 | 2 | 6 | 5.5 | 10 |
| 565 | 6 | 2 | 2 | 2 | 2 | 4.5 | 12 |
| 565 | 6 | 6 | 3 | 2 | 5 | 5.5 | 18 |
| 565 | 6 | 5 | 3 | 4 | 5 | 5.5 | 18 |
| 565 | 1 | 7 | 6 | 7 | 1 | 2   | 6  |
| 565 | 5 | 6 | 6 | 6 | 5 | 4   | 30 |
| 565 | 5 | 5 | 2 | 2 | 2 | 4.5 | 10 |
| 565 | 6 | 2 | 2 | 3 | 2 | 4.5 | 12 |
| 565 | 6 | 2 | 1 | 1 | 2 | 4   | 6  |
| 565 | 6 | 5 | 3 | 4 | 6 | 4.5 | 18 |
| 565 | 1 | 6 | 1 | 4 | 2 | 3   | 1  |
| 565 | 5 | 5 | 2 | 2 | 2 | 3   | 10 |
| 565 | 5 | 6 | 4 | 5 | 3 | 5   | 20 |
| 565 | 6 | 6 | 6 | 5 | 2 | 6   | 36 |
| 565 | 6 | 7 | 7 | 6 | 5 | 6   | 42 |
| 565 | 6 | 4 | 4 | 2 | 5 | 6   | 24 |
| 565 | 1 | 2 | 1 | 1 | 2 | 2   | 1  |
| 565 | 5 | 5 | 3 | 2 | 5 | 5.5 | 15 |

brand extension data

|     |   |   |   |   |   |     |    |
|-----|---|---|---|---|---|-----|----|
| 566 | 3 | 6 | 5 | 6 | 2 | 2.5 | 15 |
| 566 | 4 | 6 | 6 | 6 | 5 | 4.5 | 24 |
| 566 | 5 | 5 | 5 | 5 | 2 | 3   | 25 |
| 566 | 4 | 5 | 5 | 6 | 3 | 5   | 20 |
| 566 | 6 | 2 | 3 | 6 | 6 | 5   | 18 |
| 566 | 5 | 2 | 5 | 6 | 2 | 3.5 | 25 |
| 566 | 3 | 5 | 2 | 3 | 3 | 2.5 | 6  |
| 566 | 4 | 3 | 2 | 4 | 3 | 3   | 8  |
| 566 | 5 | 2 | 2 | 2 | 3 | 3   | 10 |
| 566 | 4 | 5 | 3 | 4 | 2 | 5.5 | 12 |
| 566 | 6 | 6 | 6 | 6 | 5 | 6   | 36 |
| 566 | 5 | 6 | 5 | 6 | 5 | 5.5 | 25 |
| 566 | 3 | 4 | 3 | 3 | 2 | 2.5 | 9  |
| 566 | 4 | 6 | 5 | 6 | 4 | 3.5 | 20 |
| 566 | 5 | 5 | 6 | 6 | 3 | 5.5 | 30 |
| 566 | 4 | 6 | 6 | 6 | 3 | 5.5 | 24 |
| 566 | 6 | 4 | 4 | 2 | 6 | 5.5 | 24 |
| 566 | 5 | 2 | 2 | 2 | 6 | 2.5 | 10 |
| 566 | 3 | 4 | 4 | 6 | 5 | 2.5 | 12 |
| 567 | 5 | 7 | 7 | 7 | 6 | 6   | 35 |
| 567 | 5 | 7 | 7 | 5 | 5 | 7   | 35 |
| 567 | 6 | 6 | 2 | 2 | 2 | 2.5 | 12 |
| 567 | 5 | 7 | 5 | 2 | 5 | 4   | 25 |
| 567 | 5 | 7 | 7 | 7 | 3 | 7   | 35 |
| 567 | 5 | 7 | 6 | 2 | 6 | 5   | 30 |
| 567 | 5 | 7 | 2 | 3 | 2 | 4   | 10 |
| 567 | 6 | 1 | 2 | 2 | 2 | 2.5 | 12 |
| 567 | 5 | 3 | 3 | 2 | 2 | 5   | 15 |
| 567 | 6 | 4 | 4 | 4 | 4 | 4.5 | 24 |
| 567 | 5 | 7 | 5 | 1 | 7 | 7   | 25 |
| 567 | 5 | 5 | 2 | 2 | 2 | 2.5 | 10 |
| 567 | 5 | 7 | 7 | 3 | 5 | 6.5 | 35 |
| 567 | 6 | 7 | 7 | 5 | 4 | 7   | 42 |
| 567 | 5 | 6 | 7 | 5 | 6 | 7   | 35 |
| 567 | 6 | 6 | 7 | 5 | 6 | 7   | 42 |
| 567 | 5 | 1 | 1 | 1 | 4 | 2.5 | 5  |
| 567 | 5 | 7 | 4 | 3 | 5 | 6   | 20 |
| 568 | 5 | 1 | 5 | 4 | 6 | 6   | 25 |
| 568 | 4 | 6 | 1 | 3 | 6 | 3   | 4  |
| 568 | 5 | 2 | 5 | 3 | 7 | 4   | 25 |
| 568 | 4 | 5 | 1 | 6 | 4 | 3.5 | 4  |
| 568 | 7 | 5 | 3 | 3 | 2 | 7   | 21 |
| 568 | 6 | 6 | 5 | 1 | 5 | 7   | 30 |
| 568 | 5 | 1 | 6 | 5 | 3 | 6   | 30 |
| 568 | 4 | 5 | 1 | 5 | 3 | 4   | 4  |
| 568 | 5 | 1 | 4 | 4 | 6 | 3.5 | 20 |
| 568 | 4 | 5 | 1 | 6 | 5 | 3.5 | 4  |
| 568 | 7 | 4 | 1 | 5 | 2 | 4.5 | 7  |
| 568 | 6 | 4 | 1 | 7 | 6 | 2.5 | 6  |
| 568 | 5 | 7 | 1 | 7 | 7 | 2   | 5  |
| 568 | 4 | 5 | 1 | 3 | 2 | 4.5 | 4  |

brand extension data

|     |   |   |   |   |   |     |    |
|-----|---|---|---|---|---|-----|----|
| 568 | 5 | 3 | 7 | 3 | 2 | 6   | 35 |
| 568 | 4 | 1 | 5 | 5 | 7 | 3   | 20 |
| 568 | 7 | 2 | 6 | 6 | 3 | 7   | 42 |
| 568 | 6 | 5 | 1 | 7 | 3 | 1   | 6  |
| 568 | 5 | 5 | 1 | 4 | 1 | 3   | 5  |
| 569 | 4 | 6 | 6 | 6 | 4 | 4   | 24 |
| 569 | 5 | 5 | 2 | 3 | 4 | 4   | 10 |
| 569 | 6 | 5 | 3 | 3 | 2 | 2.5 | 18 |
| 569 | 5 | 2 | 2 | 2 | 5 | 2   | 10 |
| 569 | 7 | 5 | 4 | 5 | 5 | 3.5 | 28 |
| 569 | 4 | 5 | 5 | 6 | 3 | 2.5 | 20 |
| 569 | 4 | 7 | 5 | 6 | 3 | 2   | 20 |
| 569 | 5 | 3 | 2 | 2 | 5 | 1.5 | 10 |
| 569 | 6 | 2 | 3 | 4 | 4 | 2.5 | 18 |
| 569 | 5 | 5 | 2 | 3 | 2 | 3   | 10 |
| 569 | 7 | 3 | 3 | 5 | 6 | 2   | 21 |
| 569 | 4 | 5 | 2 | 3 | 6 | 3   | 8  |
| 569 | 4 | 6 | 2 | 2 | 2 | 2   | 8  |
| 569 | 5 | 5 | 3 | 2 | 5 | 4   | 15 |
| 569 | 6 | 2 | 5 | 4 | 4 | 3   | 30 |
| 569 | 5 | 5 | 5 | 5 | 5 | 3   | 25 |
| 569 | 7 | 6 | 6 | 5 | 5 | 3.5 | 42 |
| 569 | 4 | 2 | 2 | 2 | 4 | 2   | 8  |
| 569 | 4 | 5 | 3 | 2 | 6 | 2.5 | 12 |
| 570 | 5 | 6 | 6 | 7 | 4 | 5.5 | 30 |
| 570 | 5 | 4 | 5 | 3 | 5 | 4   | 25 |
| 570 | 6 | 5 | 2 | 4 | 2 | 1.5 | 12 |
| 570 | 5 | 3 | 3 | 2 | 5 | 4   | 15 |
| 570 | 6 | 2 | 3 | 6 | 4 | 3   | 18 |
| 570 | 4 | 2 | 3 | 6 | 3 | 5   | 12 |
| 570 | 5 | 5 | 5 | 6 | 4 | 3   | 25 |
| 570 | 5 | 4 | 4 | 4 | 5 | 3   | 20 |
| 570 | 6 | 2 | 2 | 5 | 3 | 2   | 12 |
| 570 | 5 | 3 | 2 | 2 | 2 | 2.5 | 10 |
| 570 | 6 | 3 | 3 | 4 | 4 | 2   | 18 |
| 570 | 4 | 1 | 2 | 2 | 7 | 2   | 8  |
| 570 | 5 | 5 | 3 | 4 | 2 | 1   | 15 |
| 570 | 5 | 5 | 3 | 4 | 6 | 4   | 15 |
| 570 | 6 | 5 | 5 | 6 | 3 | 6.5 | 30 |
| 570 | 5 | 6 | 5 | 7 | 6 | 3.5 | 25 |
| 570 | 6 | 4 | 4 | 5 | 5 | 4   | 24 |
| 570 | 4 | 1 | 2 | 1 | 6 | 2   | 8  |
| 570 | 5 | 4 | 4 | 5 | 4 | 3.5 | 20 |
| 571 | 6 | 7 | 7 | 7 | 4 | 6.5 | 42 |
| 571 | 5 | 7 | 1 | 3 | 5 | 5.5 | 5  |
| 571 | 5 | 4 | 5 | 4 | 1 | 3   | 25 |
| 571 | 4 | 5 | 4 | 4 | 3 | 5.5 | 16 |
| 571 | 6 | 7 | 1 | 7 | 6 | 6   | 6  |
| 571 | 3 | 1 | 6 | 7 | 1 | 5.5 | 18 |
| 571 | 6 | 7 | 6 | 4 | 6 | 4   | 36 |
| 571 | 5 | 7 | 4 | 2 | 4 | 3.5 | 20 |

brand extension data

|     |   |   |   |   |   |     |    |
|-----|---|---|---|---|---|-----|----|
| 571 | 5 | 4 | 2 | 6 | 2 | 5   | 10 |
| 571 | 4 | 1 | 2 | 2 | 3 | 4   | 8  |
| 571 | 6 | 1 | 3 | 5 | 7 | 6   | 18 |
| 571 | 3 | 6 | 2 | 1 | 6 | 6.5 | 6  |
| 571 | 6 | 6 | 2 | 3 | 1 | 2   | 12 |
| 571 | 5 | 7 | 3 | 3 | 2 | 4   | 15 |
| 571 | 5 | 1 | 6 | 5 | 2 | 4.5 | 30 |
| 571 | 4 | 4 | 5 | 5 | 4 | 5   | 20 |
| 571 | 6 | 1 | 5 | 5 | 6 | 5   | 30 |
| 571 | 3 | 2 | 1 | 1 | 5 | 3   | 3  |
| 571 | 6 | 7 | 5 | 2 | 5 | 4   | 30 |
| 572 | 7 | 2 | 6 | 7 | 4 | 6   | 42 |
| 572 | 6 | 6 | 1 | 1 | 5 | 4   | 6  |
| 572 | 5 | 5 | 3 | 2 | 1 | 3.5 | 15 |
| 572 | 4 | 5 | 1 | 3 | 4 | 6   | 4  |
| 572 | 7 | 3 | 3 | 6 | 7 | 7   | 21 |
| 572 | 1 | 1 | 3 | 7 | 2 | 1.5 | 3  |
| 572 | 7 | 3 | 4 | 4 | 4 | 3.5 | 28 |
| 572 | 6 | 1 | 1 | 2 | 4 | 4.5 | 6  |
| 572 | 5 | 6 | 1 | 4 | 4 | 6   | 5  |
| 572 | 4 | 5 | 1 | 3 | 2 | 6   | 4  |
| 572 | 7 | 5 | 1 | 2 | 7 | 7   | 7  |
| 572 | 1 | 6 | 2 | 1 | 7 | 2   | 2  |
| 572 | 7 | 5 | 2 | 2 | 1 | 1.5 | 14 |
| 572 | 6 | 6 | 2 | 4 | 3 | 5   | 12 |
| 572 | 5 | 6 | 5 | 5 | 5 | 5.5 | 25 |
| 572 | 4 | 2 | 3 | 4 | 4 | 4.5 | 12 |
| 572 | 7 | 3 | 2 | 4 | 6 | 7   | 14 |
| 572 | 1 | 1 | 1 | 2 | 6 | 1   | 1  |
| 572 | 7 | 2 | 2 | 1 | 7 | 4.5 | 14 |
| 573 | 5 | 7 | 7 | 7 | 5 | 7   | 35 |
| 573 | 3 | 5 | 1 | 1 | 3 | 4.5 | 3  |
| 573 | 6 | 5 | 4 | 1 | 1 | 7   | 24 |
| 573 | 3 | 5 | 2 | 1 | 4 | 4.5 | 6  |
| 573 | 6 | 1 | 1 | 5 | 6 | 7   | 6  |
| 573 | 2 | 5 | 5 | 7 | 1 | 7   | 10 |
| 573 | 5 | 5 | 2 | 3 | 6 | 3   | 10 |
| 573 | 3 | 5 | 5 | 1 | 2 | 4.5 | 15 |
| 573 | 6 | 2 | 1 | 6 | 5 | 6   | 6  |
| 573 | 3 | 2 | 1 | 1 | 2 | 4.5 | 3  |
| 573 | 6 | 1 | 1 | 1 | 6 | 5.5 | 6  |
| 573 | 2 | 1 | 1 | 1 | 7 | 5   | 2  |
| 573 | 5 | 6 | 3 | 1 | 1 | 5   | 15 |
| 573 | 3 | 5 | 5 | 1 | 3 | 4.5 | 15 |
| 573 | 6 | 5 | 4 | 5 | 2 | 7   | 24 |
| 573 | 3 | 4 | 3 | 5 | 6 | 4.5 | 9  |
| 573 | 6 | 5 | 1 | 3 | 4 | 5.5 | 6  |
| 573 | 2 | 1 | 3 | 1 | 5 | 1   | 6  |
| 573 | 5 | 5 | 5 | 1 | 6 | 4.5 | 25 |
| 574 | 6 | 5 | 2 | 7 | 5 | 6.5 | 12 |
| 574 | 3 | 5 | 4 | 2 | 7 | 2   | 12 |

brand extension data

|     |   |   |   |   |   |     |    |
|-----|---|---|---|---|---|-----|----|
| 574 | 6 | 1 | 6 | 5 | 1 | 5   | 36 |
| 574 | 2 | 5 | 3 | 4 | 1 | 6   | 6  |
| 574 | 7 | 4 | 3 | 6 | 7 | 6.5 | 21 |
| 574 | 6 | 4 | 5 | 5 | 5 | 5   | 30 |
| 574 | 3 | 5 | 1 | 2 | 3 | 3   | 3  |
| 574 | 6 | 1 | 3 | 5 | 5 | 5.5 | 18 |
| 574 | 2 | 1 | 3 | 2 | 1 | 4   | 6  |
| 574 | 7 | 4 | 4 | 2 | 7 | 4   | 28 |
| 574 | 2 | 4 | 3 | 1 | 4 | 4.5 | 6  |
| 574 | 6 | 6 | 1 | 2 | 1 | 3   | 6  |
| 574 | 3 | 5 | 3 | 3 | 4 | 2.5 | 9  |
| 574 | 6 | 1 | 6 | 6 | 5 | 7   | 36 |
| 574 | 2 | 1 | 5 | 6 | 5 | 5.5 | 10 |
| 574 | 7 | 1 | 3 | 7 | 6 | 5.5 | 21 |
| 574 | 2 | 1 | 1 | 1 | 5 | 2   | 2  |
| 574 | 6 | 5 | 1 | 4 | 7 | 2   | 6  |
| 575 | 4 | 4 | 6 | 7 | 4 | 5   | 24 |
| 575 | 6 | 6 | 2 | 3 | 5 | 6   | 12 |
| 575 | 7 | 4 | 5 | 2 | 2 | 4.5 | 35 |
| 575 | 5 | 5 | 2 | 2 | 3 | 5.5 | 10 |
| 575 | 6 | 3 | 4 | 5 | 4 | 6   | 24 |
| 575 | 4 | 6 | 6 | 6 | 2 | 5.5 | 24 |
| 575 | 4 | 4 | 6 | 5 | 4 | 3   | 24 |
| 575 | 6 | 2 | 1 | 2 | 4 | 5   | 6  |
| 575 | 7 | 3 | 5 | 4 | 3 | 5   | 35 |
| 575 | 5 | 4 | 1 | 2 | 2 | 5   | 5  |
| 575 | 6 | 3 | 4 | 5 | 4 | 5.5 | 24 |
| 575 | 4 | 4 | 2 | 1 | 7 | 6   | 8  |
| 575 | 4 | 6 | 2 | 2 | 2 | 3   | 8  |
| 575 | 6 | 5 | 2 | 3 | 4 | 6   | 12 |
| 575 | 7 | 5 | 4 | 4 | 2 | 6   | 28 |
| 575 | 5 | 4 | 6 | 5 | 4 | 4   | 30 |
| 575 | 6 | 2 | 6 | 2 | 5 | 6   | 36 |
| 575 | 4 | 1 | 2 | 2 | 5 | 2.5 | 8  |
| 575 | 4 | 2 | 2 | 2 | 5 | 5.5 | 8  |
| 576 | 5 | 6 | 3 | 3 | 4 | 5.5 | 15 |
| 576 | 4 | 3 | 4 | 3 | 5 | 5.5 | 16 |
| 576 | 5 | 3 | 5 | 5 | 2 | 3.5 | 25 |
| 576 | 5 | 7 | 3 | 3 | 6 | 6   | 15 |
| 576 | 5 | 5 | 2 | 4 | 6 | 4   | 10 |
| 576 | 4 | 4 | 5 | 4 | 4 | 3   | 20 |
| 576 | 5 | 7 | 5 | 3 | 3 | 3   | 25 |
| 576 | 4 | 6 | 4 | 5 | 3 | 4.5 | 16 |
| 576 | 5 | 2 | 6 | 2 | 3 | 3   | 30 |
| 576 | 5 | 7 | 6 | 4 | 5 | 2.5 | 30 |
| 576 | 5 | 6 | 3 | 3 | 6 | 3   | 15 |
| 576 | 4 | 4 | 3 | 4 | 7 | 4   | 12 |
| 576 | 5 | 3 | 6 | 4 | 2 | 2   | 30 |
| 576 | 4 | 6 | 4 | 4 | 3 | 4   | 16 |
| 576 | 5 | 6 | 3 | 3 | 4 | 5   | 15 |
| 576 | 5 | 7 | 5 | 5 | 5 | 5.5 | 25 |

brand extension data

|     |   |   |   |   |   |     |    |
|-----|---|---|---|---|---|-----|----|
| 576 | 5 | 7 | 5 | 4 | 5 | 4.5 | 25 |
| 576 | 4 | 2 | 4 | 5 | 5 | 2   | 16 |
| 576 | 5 | 5 | 4 | 3 | 6 | 5   | 20 |
| 577 | 6 | 6 | 6 | 7 | 5 | 5   | 36 |
| 577 | 6 | 7 | 1 | 1 | 4 | 6.5 | 6  |
| 577 | 6 | 2 | 4 | 1 | 2 | 4.5 | 24 |
| 577 | 7 | 7 | 5 | 1 | 5 | 6   | 35 |
| 577 | 7 | 1 | 3 | 5 | 7 | 7   | 21 |
| 577 | 6 | 1 | 4 | 4 | 5 | 6   | 24 |
| 577 | 6 | 6 | 1 | 5 | 5 | 2.5 | 6  |
| 577 | 6 | 4 | 1 | 1 | 3 | 3.5 | 6  |
| 577 | 6 | 1 | 1 | 3 | 5 | 1   | 6  |
| 577 | 7 | 2 | 2 | 1 | 4 | 5.5 | 14 |
| 577 | 7 | 1 | 1 | 3 | 7 | 5.5 | 7  |
| 577 | 6 | 2 | 1 | 3 | 6 | 6.5 | 6  |
| 577 | 6 | 4 | 1 | 1 | 2 | 3   | 6  |
| 577 | 6 | 7 | 1 | 3 | 5 | 6.5 | 6  |
| 577 | 6 | 3 | 6 | 1 | 5 | 7   | 36 |
| 577 | 7 | 5 | 6 | 5 | 5 | 7   | 42 |
| 577 | 7 | 1 | 4 | 2 | 5 | 6.5 | 28 |
| 577 | 6 | 1 | 1 | 2 | 6 | 1.5 | 6  |
| 577 | 6 | 3 | 1 | 1 | 5 | 5   | 6  |
| 579 | 5 | 3 | 5 | 7 | 4 | 5   | 25 |
| 579 | 4 | 7 | 1 | 2 | 3 | 4   | 4  |
| 579 | 4 | 3 | 6 | 1 | 2 | 5   | 24 |
| 579 | 4 | 4 | 2 | 1 | 4 | 4   | 8  |
| 579 | 6 | 1 | 1 | 3 | 5 | 6   | 6  |
| 579 | 3 | 3 | 6 | 1 | 3 | 3.5 | 18 |
| 579 | 5 | 2 | 7 | 5 | 5 | 6   | 35 |
| 579 | 4 | 7 | 1 | 4 | 2 | 5   | 4  |
| 579 | 4 | 2 | 4 | 4 | 2 | 4   | 16 |
| 579 | 4 | 3 | 1 | 1 | 3 | 5.5 | 4  |
| 579 | 6 | 6 | 2 | 1 | 6 | 6.5 | 12 |
| 579 | 3 | 5 | 1 | 1 | 6 | 2.5 | 3  |
| 579 | 5 | 7 | 1 | 1 | 2 | 5   | 5  |
| 579 | 4 | 7 | 1 | 2 | 3 | 5.5 | 4  |
| 579 | 4 | 3 | 7 | 1 | 1 | 5   | 28 |
| 579 | 4 | 1 | 6 | 5 | 4 | 4   | 24 |
| 579 | 6 | 1 | 3 | 1 | 2 | 6   | 18 |
| 579 | 3 | 1 | 1 | 1 | 5 | 2   | 3  |
| 579 | 5 | 7 | 1 | 3 | 3 | 5.5 | 5  |
| 580 | 7 | 2 | 6 | 7 | 4 | 3.5 | 42 |
| 580 | 7 | 6 | 3 | 3 | 4 | 5.5 | 21 |
| 580 | 7 | 3 | 4 | 3 | 1 | 5.5 | 28 |
| 580 | 6 | 3 | 2 | 1 | 2 | 5.5 | 12 |
| 580 | 7 | 7 | 7 | 7 | 7 | 6.5 | 49 |
| 580 | 5 | 6 | 7 | 6 | 2 | 4.5 | 35 |
| 580 | 7 | 2 | 6 | 6 | 4 | 2.5 | 42 |
| 580 | 7 | 5 | 6 | 4 | 3 | 6.5 | 42 |
| 580 | 7 | 4 | 3 | 4 | 1 | 3.5 | 21 |
| 580 | 6 | 2 | 3 | 1 | 3 | 4.5 | 18 |

brand extension data

|     |   |   |   |   |   |     |    |
|-----|---|---|---|---|---|-----|----|
| 580 | 7 | 6 | 6 | 4 | 7 | 6.5 | 42 |
| 580 | 5 | 5 | 5 | 2 | 7 | 5.5 | 25 |
| 580 | 7 | 3 | 3 | 3 | 1 | 3   | 21 |
| 580 | 7 | 6 | 6 | 6 | 3 | 7   | 42 |
| 580 | 7 | 6 | 6 | 3 | 3 | 6.5 | 42 |
| 580 | 6 | 5 | 6 | 6 | 4 | 3.5 | 36 |
| 580 | 7 | 7 | 6 | 4 | 6 | 7   | 42 |
| 580 | 5 | 4 | 3 | 1 | 6 | 5   | 15 |
| 580 | 7 | 5 | 6 | 2 | 7 | 7   | 42 |
| 581 | 5 | 7 | 7 | 7 | 3 | 5.5 | 35 |
| 581 | 6 | 6 | 1 | 3 | 6 | 5.5 | 6  |
| 581 | 6 | 7 | 6 | 2 | 1 | 3   | 36 |
| 581 | 5 | 7 | 3 | 4 | 5 | 5.5 | 15 |
| 581 | 7 | 5 | 2 | 6 | 7 | 6   | 14 |
| 581 | 4 | 4 | 6 | 6 | 4 | 4.5 | 24 |
| 581 | 5 | 7 | 6 | 6 | 4 | 3   | 30 |
| 581 | 6 | 6 | 1 | 2 | 4 | 3   | 6  |
| 581 | 6 | 5 | 5 | 5 | 3 | 2   | 30 |
| 581 | 5 | 7 | 2 | 2 | 4 | 3.5 | 10 |
| 581 | 7 | 5 | 2 | 5 | 7 | 3.5 | 14 |
| 581 | 4 | 7 | 5 | 2 | 7 | 4.5 | 20 |
| 581 | 5 | 7 | 2 | 2 | 1 | 2   | 10 |
| 581 | 6 | 7 | 3 | 4 | 5 | 5   | 18 |
| 581 | 6 | 7 | 7 | 5 | 3 | 6.5 | 42 |
| 581 | 5 | 7 | 6 | 6 | 5 | 5.5 | 30 |
| 581 | 7 | 4 | 5 | 4 | 6 | 6   | 35 |
| 581 | 4 | 5 | 1 | 2 | 5 | 1.5 | 4  |
| 581 | 5 | 7 | 1 | 4 | 6 | 4.5 | 5  |
| 582 | 4 | 7 | 7 | 7 | 4 | 6   | 28 |
| 582 | 5 | 7 | 1 | 1 | 5 | 6.5 | 5  |
| 582 | 5 | 7 | 7 | 1 | 2 | 2.5 | 35 |
| 582 | 4 | 7 | 2 | 1 | 4 | 2.5 | 8  |
| 582 | 6 | 7 | 4 | 1 | 5 | 6.5 | 24 |
| 582 | 4 | 4 | 1 | 6 | 1 | 1.5 | 4  |
| 582 | 4 | 7 | 7 | 7 | 4 | 5.5 | 28 |
| 582 | 5 | 7 | 4 | 1 | 5 | 6   | 20 |
| 582 | 5 | 1 | 1 | 1 | 2 | 2   | 5  |
| 582 | 4 | 7 | 2 | 1 | 3 | 2.5 | 8  |
| 582 | 6 | 7 | 1 | 1 | 6 | 1.5 | 6  |
| 582 | 4 | 7 | 1 | 1 | 7 | 1.5 | 4  |
| 582 | 4 | 7 | 1 | 1 | 2 | 1.5 | 4  |
| 582 | 5 | 7 | 1 | 1 | 7 | 6   | 5  |
| 582 | 5 | 7 | 7 | 4 | 3 | 2.5 | 35 |
| 582 | 4 | 7 | 7 | 5 | 3 | 2   | 28 |
| 582 | 6 | 2 | 3 | 1 | 6 | 6.5 | 18 |
| 582 | 4 | 2 | 1 | 1 | 7 | 1.5 | 4  |
| 582 | 4 | 7 | 4 | 1 | 7 | 6   | 16 |
| 583 | 6 | 5 | 4 | 6 | 2 | 5.5 | 24 |
| 583 | 6 | 2 | 1 | 1 | 4 | 5.5 | 6  |
| 583 | 4 | 2 | 1 | 1 | 2 | 5   | 4  |
| 583 | 4 | 2 | 2 | 1 | 2 | 5.5 | 8  |

brand extension data

|     |   |   |   |   |   |     |    |
|-----|---|---|---|---|---|-----|----|
| 583 | 7 | 3 | 3 | 6 | 4 | 6.5 | 21 |
| 583 | 5 | 6 | 6 | 7 | 1 | 6.5 | 30 |
| 583 | 6 | 2 | 1 | 6 | 2 | 6.5 | 6  |
| 583 | 6 | 2 | 1 | 1 | 2 | 5   | 6  |
| 583 | 4 | 4 | 5 | 6 | 2 | 5.5 | 20 |
| 583 | 4 | 2 | 2 | 1 | 2 | 5   | 8  |
| 583 | 7 | 1 | 2 | 2 | 3 | 5.5 | 14 |
| 583 | 5 | 2 | 2 | 2 | 3 | 5.5 | 10 |
| 583 | 6 | 2 | 1 | 1 | 2 | 3.5 | 6  |
| 583 | 6 | 2 | 4 | 5 | 2 | 6   | 24 |
| 583 | 4 | 5 | 5 | 6 | 2 | 6   | 20 |
| 583 | 4 | 6 | 5 | 7 | 2 | 6   | 20 |
| 583 | 7 | 5 | 3 | 2 | 2 | 5.5 | 21 |
| 583 | 5 | 1 | 1 | 2 | 3 | 4.5 | 5  |
| 583 | 6 | 2 | 3 | 2 | 4 | 6   | 18 |
| 584 | 5 | 7 | 7 | 7 | 2 | 5.5 | 35 |
| 584 | 4 | 5 | 3 | 1 | 5 | 3   | 12 |
| 584 | 5 | 2 | 4 | 4 | 3 | 4   | 20 |
| 584 | 4 | 5 | 3 | 4 | 3 | 4.5 | 12 |
| 584 | 7 | 3 | 5 | 6 | 5 | 6   | 35 |
| 584 | 5 | 4 | 6 | 6 | 2 | 3   | 30 |
| 584 | 5 | 6 | 6 | 5 | 3 | 5   | 30 |
| 584 | 4 | 5 | 3 | 1 | 4 | 5.5 | 12 |
| 584 | 5 | 1 | 4 | 6 | 3 | 4   | 20 |
| 584 | 4 | 5 | 3 | 2 | 2 | 3.5 | 12 |
| 584 | 7 | 4 | 4 | 5 | 4 | 5   | 28 |
| 584 | 5 | 3 | 1 | 1 | 7 | 4   | 5  |
| 584 | 5 | 5 | 4 | 3 | 3 | 3   | 20 |
| 584 | 4 | 5 | 2 | 5 | 5 | 6   | 8  |
| 584 | 5 | 4 | 5 | 6 | 3 | 5   | 25 |
| 584 | 4 | 2 | 5 | 7 | 2 | 4.5 | 20 |
| 584 | 7 | 5 | 4 | 4 | 5 | 4   | 28 |
| 584 | 5 | 4 | 3 | 2 | 4 | 3   | 15 |
| 584 | 5 | 5 | 4 | 4 | 5 | 5.5 | 20 |
| 585 | 4 | 7 | 6 | 6 | 5 | 5   | 24 |
| 585 | 5 | 4 | 2 | 3 | 4 | 3.5 | 10 |
| 585 | 6 | 5 | 5 | 2 | 1 | 4   | 30 |
| 585 | 6 | 3 | 4 | 4 | 3 | 4   | 24 |
| 585 | 7 | 6 | 3 | 7 | 6 | 5.5 | 21 |
| 585 | 5 | 5 | 5 | 5 | 4 | 5.5 | 25 |
| 585 | 4 | 5 | 5 | 4 | 5 | 5   | 20 |
| 585 | 5 | 5 | 3 | 4 | 3 | 3.5 | 15 |
| 585 | 6 | 4 | 6 | 6 | 2 | 5   | 36 |
| 585 | 6 | 3 | 3 | 3 | 3 | 4   | 18 |
| 585 | 7 | 5 | 3 | 5 | 5 | 4.5 | 21 |
| 585 | 5 | 4 | 2 | 2 | 6 | 5.5 | 10 |
| 585 | 4 | 5 | 3 | 2 | 1 | 2.5 | 12 |
| 585 | 5 | 5 | 4 | 5 | 4 | 5   | 20 |
| 585 | 6 | 5 | 7 | 7 | 3 | 5.5 | 42 |
| 585 | 6 | 2 | 5 | 5 | 4 | 4   | 30 |
| 585 | 7 | 4 | 1 | 2 | 4 | 3.5 | 7  |

brand extension data

|     |   |   |   |   |   |     |    |
|-----|---|---|---|---|---|-----|----|
| 585 | 5 | 4 | 2 | 1 | 5 | 3   | 10 |
| 585 | 4 | 3 | 3 | 3 | 4 | 5   | 12 |
| 586 | 6 | 7 | 7 | 7 | 6 | 3   | 42 |
| 586 | 5 | 7 | 1 | 4 | 5 | 2   | 5  |
| 586 | 5 | 1 | 1 | 1 | 3 | 1   | 5  |
| 586 | 6 | 2 | 2 | 2 | 3 | 3.5 | 12 |
| 586 | 7 | 5 | 7 | 7 | 6 | 4   | 49 |
| 586 | 4 | 6 | 7 | 5 | 4 | 5   | 28 |
| 586 | 6 | 4 | 4 | 3 | 6 | 2   | 24 |
| 586 | 5 | 7 | 1 | 1 | 3 | 2.5 | 5  |
| 586 | 5 | 1 | 5 | 6 | 3 | 3.5 | 25 |
| 586 | 6 | 1 | 2 | 1 | 4 | 2   | 12 |
| 586 | 7 | 5 | 2 | 4 | 7 | 3   | 14 |
| 586 | 4 | 7 | 1 | 1 | 7 | 3.5 | 4  |
| 586 | 6 | 7 | 1 | 1 | 3 | 1   | 6  |
| 586 | 5 | 7 | 1 | 1 | 2 | 7   | 5  |
| 586 | 5 | 4 | 4 | 1 | 3 | 6   | 20 |
| 586 | 6 | 4 | 7 | 5 | 6 | 2.5 | 42 |
| 586 | 7 | 1 | 1 | 2 | 5 | 3   | 7  |
| 586 | 4 | 1 | 1 | 1 | 5 | 1   | 4  |
| 586 | 6 | 7 | 1 | 1 | 6 | 4.5 | 6  |
| 587 | 7 | 7 | 7 | 7 | 5 | 6.5 | 49 |
| 587 | 4 | 7 | 1 | 4 | 6 | 4   | 4  |
| 587 | 7 | 1 | 6 | 1 | 1 | 4.5 | 42 |
| 587 | 7 | 7 | 3 | 3 | 1 | 4.5 | 21 |
| 587 | 7 | 7 | 7 | 7 | 7 | 7   | 49 |
| 587 | 5 | 2 | 7 | 7 | 1 | 7   | 35 |
| 587 | 7 | 7 | 7 | 5 | 6 | 4.5 | 49 |
| 587 | 4 | 7 | 1 | 4 | 1 | 4   | 4  |
| 587 | 7 | 1 | 3 | 5 | 1 | 1   | 21 |
| 587 | 7 | 1 | 2 | 1 | 3 | 4.5 | 14 |
| 587 | 7 | 7 | 1 | 4 | 7 | 3.5 | 7  |
| 587 | 5 | 7 | 1 | 3 | 7 | 6.5 | 5  |
| 587 | 7 | 7 | 1 | 1 | 1 | 1   | 7  |
| 587 | 4 | 7 | 7 | 6 | 7 | 6   | 28 |
| 587 | 7 | 7 | 7 | 7 | 5 | 7   | 49 |
| 587 | 7 | 7 | 7 | 7 | 5 | 7   | 49 |
| 587 | 7 | 1 | 7 | 5 | 2 | 7   | 49 |
| 587 | 5 | 2 | 1 | 1 | 5 | 2   | 5  |
| 587 | 7 | 7 | 7 | 4 | 6 | 2   | 49 |
| 588 | 5 | 7 | 6 | 7 | 4 | 4.5 | 30 |
| 588 | 4 | 7 | 1 | 7 | 4 | 4   | 4  |
| 588 | 6 | 1 | 1 | 1 | 1 | 2   | 6  |
| 588 | 2 | 1 | 1 | 1 | 1 | 1.5 | 2  |
| 588 | 7 | 5 | 6 | 7 | 6 | 2.5 | 42 |
| 588 | 5 | 7 | 7 | 7 | 1 | 5.5 | 35 |
| 588 | 5 | 2 | 1 | 3 | 4 | 1.5 | 5  |
| 588 | 4 | 3 | 1 | 4 | 2 | 1   | 4  |
| 588 | 6 | 1 | 1 | 4 | 1 | 2   | 6  |
| 588 | 2 | 1 | 1 | 1 | 2 | 1.5 | 2  |
| 588 | 7 | 5 | 4 | 7 | 7 | 2   | 28 |

brand extension data

|     |   |   |   |   |   |     |    |
|-----|---|---|---|---|---|-----|----|
| 588 | 5 | 2 | 2 | 1 | 7 | 2   | 10 |
| 588 | 5 | 1 | 1 | 1 | 1 | 1   | 5  |
| 588 | 4 | 7 | 1 | 7 | 7 | 5.5 | 4  |
| 588 | 6 | 1 | 1 | 1 | 1 | 1.5 | 6  |
| 588 | 2 | 5 | 6 | 5 | 4 | 2.5 | 12 |
| 588 | 7 | 2 | 7 | 4 | 5 | 3   | 49 |
| 588 | 5 | 1 | 1 | 1 | 7 | 1.5 | 5  |
| 588 | 5 | 5 | 1 | 4 | 4 | 1.5 | 5  |
| 589 | 6 | 7 | 7 | 7 | 3 | 6.5 | 42 |
| 589 | 5 | 7 | 2 | 6 | 5 | 5   | 10 |
| 589 | 6 | 1 | 6 | 3 | 1 | 3   | 36 |
| 589 | 5 | 2 | 3 | 2 | 3 | 3   | 15 |
| 589 | 6 | 2 | 2 | 5 | 7 | 5.5 | 12 |
| 589 | 3 | 3 | 5 | 6 | 4 | 3.5 | 15 |
| 589 | 6 | 5 | 4 | 5 | 3 | 3.5 | 24 |
| 589 | 5 | 6 | 2 | 3 | 4 | 4.5 | 10 |
| 589 | 6 | 1 | 3 | 1 | 3 | 2.5 | 18 |
| 589 | 5 | 2 | 3 | 2 | 2 | 2.5 | 15 |
| 589 | 6 | 6 | 2 | 3 | 7 | 3.5 | 12 |
| 589 | 3 | 7 | 2 | 5 | 7 | 4.5 | 6  |
| 589 | 6 | 6 | 2 | 4 | 1 | 3.5 | 12 |
| 589 | 5 | 6 | 3 | 4 | 4 | 4.5 | 15 |
| 589 | 6 | 4 | 6 | 5 | 3 | 5   | 36 |
| 589 | 5 | 4 | 6 | 6 | 3 | 3.5 | 30 |
| 589 | 6 | 2 | 2 | 4 | 6 | 4.5 | 12 |
| 589 | 3 | 1 | 2 | 1 | 6 | 2   | 6  |
| 589 | 6 | 6 | 3 | 4 | 5 | 5   | 18 |
| 590 | 6 | 7 | 7 | 7 | 7 | 4   | 42 |
| 590 | 6 | 7 | 7 | 7 | 7 | 2.5 | 42 |
| 590 | 7 | 1 | 1 | 1 | 1 | 1   | 7  |
| 590 | 6 | 1 | 1 | 1 | 5 | 3.5 | 6  |
| 590 | 7 | 7 | 7 | 7 | 6 | 7   | 49 |
| 590 | 3 | 1 | 7 | 7 | 3 | 1   | 21 |
| 590 | 6 | 1 | 1 | 7 | 7 | 1   | 6  |
| 590 | 6 | 1 | 1 | 7 | 5 | 3   | 6  |
| 590 | 7 | 7 | 7 | 7 | 4 | 1   | 49 |
| 590 | 6 | 1 | 1 | 1 | 3 | 3   | 6  |
| 590 | 7 | 7 | 7 | 7 | 6 | 6   | 49 |
| 590 | 3 | 1 | 1 | 7 | 7 | 3.5 | 3  |
| 590 | 6 | 1 | 1 | 5 | 1 | 1   | 6  |
| 590 | 6 | 7 | 7 | 7 | 7 | 4.5 | 42 |
| 590 | 7 | 7 | 7 | 7 | 4 | 2.5 | 49 |
| 590 | 6 | 7 | 7 | 7 | 6 | 3   | 42 |
| 590 | 7 | 1 | 1 | 7 | 3 | 2   | 7  |
| 590 | 3 | 1 | 1 | 1 | 5 | 1   | 3  |
| 590 | 6 | 7 | 1 | 7 | 7 | 3   | 6  |
| 591 | 7 | 7 | 7 | 7 | 2 | 7   | 49 |
| 591 | 2 | 7 | 1 | 3 | 5 | 2   | 2  |
| 591 | 7 | 3 | 5 | 5 | 2 | 2   | 35 |
| 591 | 3 | 7 | 2 | 3 | 2 | 2.5 | 6  |
| 591 | 7 | 3 | 2 | 7 | 6 | 7   | 14 |

brand extension data

|     |   |   |   |   |   |     |    |
|-----|---|---|---|---|---|-----|----|
| 591 | 3 | 7 | 4 | 7 | 5 | 6   | 12 |
| 591 | 7 | 7 | 6 | 6 | 2 | 7   | 42 |
| 591 | 2 | 7 | 3 | 3 | 2 | 2.5 | 6  |
| 591 | 7 | 3 | 6 | 7 | 3 | 4.5 | 42 |
| 591 | 3 | 3 | 2 | 1 | 2 | 2   | 6  |
| 591 | 7 | 7 | 2 | 5 | 6 | 4.5 | 14 |
| 591 | 3 | 7 | 1 | 2 | 7 | 4   | 3  |
| 591 | 7 | 7 | 2 | 2 | 2 | 3.5 | 14 |
| 591 | 2 | 7 | 4 | 3 | 3 | 4   | 8  |
| 591 | 7 | 3 | 6 | 6 | 2 | 7   | 42 |
| 591 | 3 | 3 | 5 | 4 | 3 | 6   | 15 |
| 591 | 7 | 2 | 3 | 6 | 4 | 4   | 21 |
| 591 | 3 | 2 | 1 | 1 | 5 | 2   | 3  |
| 591 | 7 | 7 | 5 | 3 | 5 | 4   | 35 |
| 592 | 6 | 7 | 1 | 4 | 5 | 6.5 | 6  |
| 592 | 6 | 6 | 3 | 2 | 4 | 4   | 18 |
| 592 | 6 | 5 | 3 | 4 | 3 | 4.5 | 18 |
| 592 | 4 | 4 | 7 | 4 | 2 | 3   | 28 |
| 592 | 3 | 2 | 4 | 3 | 2 | 5   | 12 |
| 592 | 6 | 6 | 2 | 1 | 6 | 6   | 12 |
| 592 | 6 | 5 | 6 | 6 | 3 | 3.5 | 36 |
| 592 | 6 | 5 | 4 | 3 | 2 | 4.5 | 24 |
| 592 | 4 | 5 | 4 | 4 | 4 | 4   | 16 |
| 592 | 7 | 4 | 6 | 7 | 5 | 4.5 | 42 |
| 592 | 3 | 1 | 3 | 4 | 4 | 3   | 9  |
| 592 | 6 | 7 | 4 | 4 | 3 | 2.5 | 24 |
| 592 | 6 | 5 | 5 | 6 | 4 | 6   | 30 |
| 592 | 6 | 5 | 6 | 4 | 6 | 7   | 36 |
| 592 | 4 | 6 | 3 | 4 | 5 | 5   | 12 |
| 592 | 7 | 2 | 7 | 6 | 5 | 5   | 49 |
| 592 | 3 | 3 | 1 | 3 | 4 | 1.5 | 3  |
| 592 | 6 | 4 | 2 | 6 | 5 | 5.5 | 12 |
| 593 | 2 | 7 | 5 | 7 | 4 | 1.5 | 10 |
| 593 | 4 | 4 | 2 | 2 | 5 | 2.5 | 8  |
| 593 | 7 | 7 | 5 | 4 | 2 | 6.5 | 35 |
| 593 | 5 | 7 | 2 | 3 | 2 | 5   | 10 |
| 593 | 4 | 3 | 6 | 5 | 6 | 2.5 | 24 |
| 593 | 4 | 7 | 6 | 7 | 2 | 7   | 24 |
| 593 | 2 | 7 | 3 | 5 | 5 | 1.5 | 6  |
| 593 | 4 | 5 | 2 | 2 | 3 | 2.5 | 8  |
| 593 | 7 | 1 | 1 | 1 | 1 | 3   | 7  |
| 593 | 5 | 7 | 2 | 1 | 2 | 5.5 | 10 |
| 593 | 4 | 4 | 4 | 4 | 7 | 2.5 | 16 |
| 593 | 4 | 5 | 1 | 2 | 7 | 6   | 4  |
| 593 | 2 | 7 | 1 | 2 | 2 | 2.5 | 2  |
| 593 | 4 | 1 | 2 | 3 | 4 | 2   | 8  |
| 593 | 7 | 7 | 6 | 5 | 1 | 6.5 | 42 |
| 593 | 5 | 5 | 3 | 5 | 5 | 4.5 | 15 |
| 593 | 4 | 6 | 4 | 3 | 6 | 4.5 | 16 |
| 593 | 4 | 1 | 1 | 1 | 6 | 2   | 4  |
| 593 | 2 | 3 | 2 | 2 | 3 | 2   | 4  |

brand extension data

|     |   |   |   |   |   |     |    |
|-----|---|---|---|---|---|-----|----|
| 595 | 4 | 3 | 6 | 7 | 4 | 2.5 | 24 |
| 595 | 5 | 5 | 1 | 4 | 6 | 1.5 | 5  |
| 595 | 5 | 1 | 5 | 1 | 1 | 2.5 | 25 |
| 595 | 7 | 1 | 1 | 1 | 3 | 4   | 7  |
| 595 | 7 | 3 | 2 | 5 | 6 | 3.5 | 14 |
| 595 | 3 | 5 | 4 | 6 | 1 | 5   | 12 |
| 595 | 4 | 3 | 4 | 5 | 4 | 2   | 16 |
| 595 | 5 | 1 | 2 | 1 | 1 | 1.5 | 10 |
| 595 | 5 | 1 | 2 | 1 | 2 | 3.5 | 10 |
| 595 | 7 | 1 | 1 | 1 | 1 | 3.5 | 7  |
| 595 | 7 | 5 | 4 | 5 | 6 | 3.5 | 28 |
| 595 | 3 | 2 | 1 | 3 | 5 | 3   | 3  |
| 595 | 4 | 5 | 1 | 1 | 1 | 3   | 4  |
| 595 | 5 | 5 | 2 | 4 | 2 | 2.5 | 10 |
| 595 | 5 | 1 | 5 | 4 | 1 | 3   | 25 |
| 595 | 7 | 5 | 6 | 5 | 3 | 2   | 42 |
| 595 | 7 | 1 | 1 | 1 | 1 | 4   | 7  |
| 595 | 3 | 1 | 1 | 1 | 5 | 2.5 | 3  |
| 595 | 4 | 1 | 2 | 4 | 1 | 2   | 8  |
| 596 | 4 | 2 | 6 | 7 | 2 | 4.5 | 24 |
| 596 | 4 | 7 | 1 | 2 | 5 | 5   | 4  |
| 596 | 7 | 2 | 1 | 2 | 2 | 5   | 7  |
| 596 | 4 | 5 | 1 | 3 | 3 | 5.5 | 4  |
| 596 | 4 | 1 | 2 | 6 | 5 | 6   | 8  |
| 596 | 6 | 1 | 2 | 5 | 3 | 6.5 | 12 |
| 596 | 4 | 4 | 4 | 5 | 2 | 3.5 | 16 |
| 596 | 4 | 4 | 1 | 2 | 3 | 2.5 | 4  |
| 596 | 7 | 1 | 1 | 2 | 2 | 2.5 | 7  |
| 596 | 4 | 2 | 1 | 3 | 1 | 4   | 4  |
| 596 | 4 | 7 | 2 | 5 | 4 | 5.5 | 8  |
| 596 | 6 | 5 | 2 | 3 | 6 | 3   | 12 |
| 596 | 4 | 4 | 1 | 3 | 2 | 2.5 | 4  |
| 596 | 4 | 5 | 1 | 3 | 4 | 3   | 4  |
| 596 | 7 | 5 | 5 | 6 | 2 | 5   | 35 |
| 596 | 4 | 6 | 1 | 3 | 3 | 5.5 | 4  |
| 596 | 4 | 1 | 6 | 4 | 5 | 6.5 | 24 |
| 596 | 6 | 4 | 2 | 2 | 3 | 4   | 12 |
| 596 | 4 | 5 | 1 | 2 | 5 | 5.5 | 4  |
| 597 | 3 | 2 | 3 | 6 | 3 | 2.5 | 9  |
| 597 | 3 | 5 | 3 | 4 | 6 | 2.5 | 9  |
| 597 | 6 | 5 | 6 | 4 | 3 | 3   | 36 |
| 597 | 4 | 5 | 4 | 3 | 4 | 4.5 | 16 |
| 597 | 6 | 5 | 6 | 6 | 6 | 5   | 36 |
| 597 | 6 | 3 | 6 | 6 | 5 | 6   | 36 |
| 597 | 3 | 3 | 4 | 6 | 5 | 2.5 | 12 |
| 597 | 3 | 5 | 2 | 4 | 5 | 2.5 | 6  |
| 597 | 6 | 5 | 6 | 6 | 4 | 6   | 36 |
| 597 | 4 | 5 | 4 | 3 | 3 | 4.5 | 16 |
| 597 | 6 | 5 | 6 | 6 | 6 | 6   | 36 |
| 597 | 6 | 3 | 6 | 2 | 6 | 6   | 36 |
| 597 | 3 | 4 | 4 | 5 | 3 | 2.5 | 12 |

brand extension data

|     |   |   |   |   |   |     |    |
|-----|---|---|---|---|---|-----|----|
| 597 | 3 | 5 | 2 | 4 | 5 | 2.5 | 6  |
| 597 | 6 | 5 | 6 | 6 | 4 | 6   | 36 |
| 597 | 4 | 3 | 3 | 6 | 4 | 2.5 | 12 |
| 597 | 6 | 3 | 6 | 6 | 6 | 6   | 36 |
| 597 | 6 | 3 | 3 | 1 | 6 | 3.5 | 18 |
| 597 | 3 | 5 | 2 | 4 | 6 | 3   | 6  |
| 598 | 5 | 7 | 6 | 7 | 5 | 5.5 | 30 |
| 598 | 5 | 7 | 1 | 2 | 5 | 3.5 | 5  |
| 598 | 5 | 5 | 4 | 1 | 3 | 3   | 20 |
| 598 | 5 | 7 | 2 | 1 | 3 | 5.5 | 10 |
| 598 | 6 | 1 | 2 | 4 | 5 | 3.5 | 12 |
| 598 | 3 | 5 | 4 | 4 | 2 | 5   | 12 |
| 598 | 5 | 7 | 6 | 4 | 6 | 3   | 30 |
| 598 | 5 | 4 | 1 | 1 | 2 | 5   | 5  |
| 598 | 5 | 5 | 5 | 5 | 2 | 5.5 | 25 |
| 598 | 5 | 4 | 2 | 1 | 2 | 3.5 | 10 |
| 598 | 6 | 5 | 1 | 2 | 4 | 3   | 6  |
| 598 | 3 | 3 | 1 | 1 | 6 | 4.5 | 3  |
| 598 | 5 | 6 | 1 | 1 | 3 | 2   | 5  |
| 598 | 5 | 4 | 2 | 1 | 3 | 5   | 10 |
| 598 | 5 | 5 | 5 | 2 | 3 | 4.5 | 25 |
| 598 | 5 | 7 | 6 | 5 | 5 | 5.5 | 30 |
| 598 | 6 | 1 | 3 | 2 | 3 | 6   | 18 |
| 598 | 3 | 1 | 1 | 2 | 5 | 2   | 3  |
| 598 | 5 | 5 | 1 | 1 | 5 | 5.5 | 5  |
| 599 | 3 | 4 | 1 | 2 | 1 | 3.5 | 3  |
| 599 | 6 | 6 | 1 | 1 | 3 | 3.5 | 6  |
| 599 | 6 | 2 | 1 | 3 | 2 | 4   | 6  |
| 599 | 6 | 4 | 2 | 1 | 6 | 2.5 | 12 |
| 599 | 7 | 4 | 1 | 1 | 1 | 4   | 7  |
| 599 | 3 | 1 | 1 | 2 | 3 | 4   | 3  |
| 599 | 4 | 6 | 1 | 3 | 2 | 2.5 | 4  |
| 599 | 6 | 1 | 1 | 4 | 2 | 1   | 6  |
| 599 | 6 | 2 | 1 | 2 | 3 | 4   | 6  |
| 599 | 6 | 4 | 3 | 3 | 6 | 5   | 18 |
| 599 | 7 | 5 | 1 | 3 | 7 | 5.5 | 7  |
| 599 | 3 | 4 | 1 | 3 | 3 | 1   | 3  |
| 599 | 4 | 6 | 1 | 2 | 4 | 4.5 | 4  |
| 599 | 6 | 7 | 4 | 4 | 2 | 5.5 | 24 |
| 599 | 6 | 6 | 1 | 4 | 2 | 5.5 | 6  |
| 599 | 6 | 5 | 1 | 3 | 6 | 6   | 6  |
| 599 | 7 | 1 | 1 | 3 | 3 | 1   | 7  |
| 600 | 6 | 7 | 7 | 7 | 3 | 6   | 42 |
| 600 | 5 | 6 | 4 | 3 | 6 | 5   | 20 |
| 600 | 6 | 6 | 6 | 5 | 2 | 4   | 36 |
| 600 | 4 | 6 | 5 | 2 | 4 | 4.5 | 20 |
| 600 | 7 | 5 | 5 | 6 | 6 | 6   | 35 |
| 600 | 4 | 5 | 5 | 6 | 2 | 3   | 20 |
| 600 | 6 | 6 | 4 | 5 | 5 | 5   | 24 |
| 600 | 5 | 5 | 4 | 4 | 4 | 4   | 20 |
| 600 | 6 | 4 | 4 | 6 | 2 | 4.5 | 24 |

brand extension data

|     |   |   |   |   |   |     |    |
|-----|---|---|---|---|---|-----|----|
| 600 | 4 | 3 | 2 | 2 | 3 | 4   | 8  |
| 600 | 7 | 5 | 5 | 6 | 6 | 6   | 35 |
| 600 | 4 | 6 | 3 | 2 | 7 | 6   | 12 |
| 600 | 6 | 7 | 4 | 4 | 2 | 4   | 24 |
| 600 | 5 | 6 | 5 | 4 | 4 | 4.5 | 25 |
| 600 | 6 | 6 | 7 | 5 | 2 | 6   | 42 |
| 600 | 4 | 6 | 6 | 6 | 5 | 5   | 24 |
| 600 | 7 | 5 | 3 | 3 | 6 | 6   | 21 |
| 600 | 4 | 3 | 2 | 1 | 6 | 3.5 | 8  |
| 600 | 6 | 5 | 5 | 4 | 6 | 4   | 30 |
| 601 | 7 | 7 | 7 | 7 | 2 | 7   | 49 |
| 601 | 6 | 7 | 6 | 2 | 6 | 6   | 36 |
| 601 | 7 | 2 | 3 | 2 | 1 | 2.5 | 21 |
| 601 | 6 | 5 | 5 | 4 | 3 | 4   | 30 |
| 601 | 7 | 5 | 4 | 5 | 5 | 6.5 | 28 |
| 601 | 6 | 4 | 2 | 7 | 2 | 5.5 | 12 |
| 601 | 7 | 6 | 4 | 5 | 4 | 6.5 | 28 |
| 601 | 6 | 5 | 5 | 2 | 5 | 2   | 30 |
| 601 | 7 | 1 | 1 | 1 | 2 | 2   | 7  |
| 601 | 6 | 3 | 3 | 3 | 1 | 4   | 18 |
| 601 | 7 | 3 | 4 | 4 | 4 | 4.5 | 28 |
| 601 | 6 | 3 | 2 | 1 | 7 | 3.5 | 12 |
| 601 | 7 | 6 | 5 | 3 | 1 | 2.5 | 35 |
| 601 | 6 | 4 | 4 | 2 | 3 | 6   | 24 |
| 601 | 7 | 6 | 7 | 5 | 2 | 6   | 49 |
| 601 | 6 | 6 | 6 | 6 | 5 | 5   | 36 |
| 601 | 7 | 5 | 5 | 5 | 6 | 5   | 35 |
| 601 | 6 | 1 | 1 | 1 | 6 | 1.5 | 6  |
| 601 | 7 | 3 | 4 | 3 | 4 | 4.5 | 28 |
| 602 | 5 | 6 | 6 | 6 | 1 | 3.5 | 30 |
| 602 | 3 | 2 | 2 | 1 | 6 | 1   | 6  |
| 602 | 6 | 6 | 6 | 6 | 1 | 3.5 | 36 |
| 602 | 3 | 6 | 2 | 2 | 1 | 1.5 | 6  |
| 602 | 7 | 6 | 6 | 6 | 6 | 6   | 42 |
| 602 | 1 | 2 | 6 | 6 | 1 | 1   | 6  |
| 602 | 5 | 6 | 6 | 6 | 1 | 6   | 30 |
| 602 | 3 | 2 | 2 | 6 | 1 | 4   | 6  |
| 602 | 6 | 2 | 2 | 2 | 1 | 3.5 | 12 |
| 602 | 3 | 6 | 2 | 2 | 1 | 1   | 6  |
| 602 | 7 | 6 | 6 | 6 | 6 | 6   | 42 |
| 602 | 1 | 2 | 2 | 2 | 6 | 6   | 2  |
| 602 | 5 | 6 | 2 | 1 | 1 | 1.5 | 10 |
| 602 | 3 | 2 | 2 | 6 | 6 | 6   | 6  |
| 602 | 6 | 6 | 6 | 2 | 1 | 3.5 | 36 |
| 602 | 3 | 6 | 6 | 6 | 1 | 1.5 | 18 |
| 602 | 7 | 2 | 2 | 2 | 6 | 6   | 14 |
| 602 | 1 | 2 | 2 | 2 | 1 | 3.5 | 2  |
| 602 | 5 | 2 | 2 | 6 | 6 | 6   | 10 |
| 603 | 6 | 1 | 6 | 7 | 5 | 5   | 36 |
| 603 | 6 | 6 | 1 | 3 | 3 | 3.5 | 6  |
| 603 | 6 | 2 | 5 | 3 | 2 | 3   | 30 |

brand extension data

|     |   |   |   |   |   |     |    |
|-----|---|---|---|---|---|-----|----|
| 603 | 6 | 5 | 2 | 3 | 4 | 3.5 | 12 |
| 603 | 6 | 4 | 4 | 5 | 6 | 5.5 | 24 |
| 603 | 5 | 1 | 5 | 6 | 5 | 6   | 25 |
| 603 | 6 | 1 | 5 | 5 | 6 | 4.5 | 30 |
| 603 | 6 | 6 | 1 | 3 | 2 | 3   | 6  |
| 603 | 6 | 2 | 4 | 3 | 2 | 2   | 24 |
| 603 | 6 | 5 | 2 | 2 | 2 | 3.5 | 12 |
| 603 | 6 | 6 | 2 | 2 | 5 | 1.5 | 12 |
| 603 | 5 | 5 | 4 | 2 | 7 | 1.5 | 20 |
| 603 | 6 | 6 | 1 | 2 | 2 | 2   | 6  |
| 603 | 6 | 6 | 2 | 3 | 2 | 4.5 | 12 |
| 603 | 6 | 3 | 6 | 5 | 2 | 6   | 36 |
| 603 | 6 | 2 | 6 | 5 | 5 | 4   | 36 |
| 603 | 6 | 2 | 6 | 2 | 4 | 6   | 36 |
| 603 | 5 | 1 | 1 | 2 | 4 | 3.5 | 5  |
| 603 | 6 | 6 | 2 | 3 | 4 | 3.5 | 12 |
| 604 | 7 | 6 | 1 | 5 | 6 | 5.5 | 7  |
| 604 | 6 | 6 | 5 | 6 | 5 | 5   | 30 |
| 604 | 6 | 5 | 6 | 5 | 5 | 5.5 | 36 |
| 604 | 6 | 5 | 5 | 5 | 4 | 4.5 | 30 |
| 604 | 7 | 6 | 3 | 4 | 6 | 4.5 | 21 |
| 604 | 6 | 4 | 5 | 6 | 5 | 4   | 30 |
| 604 | 7 | 6 | 5 | 6 | 4 | 4.5 | 35 |
| 604 | 6 | 5 | 4 | 4 | 5 | 5   | 24 |
| 604 | 6 | 6 | 4 | 5 | 4 | 4.5 | 24 |
| 604 | 6 | 6 | 4 | 4 | 5 | 4   | 24 |
| 604 | 7 | 5 | 5 | 5 | 6 | 5   | 35 |
| 604 | 6 | 3 | 6 | 4 | 6 | 4   | 36 |
| 604 | 7 | 6 | 5 | 5 | 5 | 3.5 | 35 |
| 604 | 6 | 5 | 5 | 6 | 4 | 3.5 | 30 |
| 604 | 6 | 5 | 5 | 4 | 4 | 4.5 | 30 |
| 604 | 6 | 5 | 3 | 4 | 5 | 4   | 18 |
| 604 | 6 | 3 | 2 | 4 | 3 | 4   | 12 |
| 604 | 7 | 6 | 4 | 4 | 5 | 5   | 28 |
| 605 | 1 | 3 | 2 | 3 | 4 | 2   | 2  |
| 605 | 3 | 5 | 4 | 3 | 4 | 3.5 | 12 |
| 605 | 4 | 5 | 3 | 3 | 3 | 3.5 | 12 |
| 605 | 4 | 2 | 4 | 4 | 2 | 2   | 16 |
| 605 | 6 | 5 | 3 | 4 | 3 | 4   | 18 |
| 605 | 7 | 2 | 4 | 4 | 1 | 5   | 28 |
| 605 | 1 | 2 | 3 | 2 | 3 | 5   | 3  |
| 605 | 3 | 4 | 5 | 4 | 4 | 3   | 15 |
| 605 | 4 | 4 | 1 | 2 | 3 | 3   | 4  |
| 605 | 4 | 3 | 3 | 5 | 2 | 5.5 | 12 |
| 605 | 6 | 5 | 4 | 3 | 4 | 5   | 24 |
| 605 | 7 | 2 | 6 | 5 | 6 | 3   | 42 |
| 605 | 1 | 4 | 5 | 3 | 3 | 3   | 5  |
| 605 | 3 | 3 | 3 | 5 | 3 | 3.5 | 9  |
| 605 | 4 | 3 | 1 | 3 | 4 | 3.5 | 4  |
| 605 | 4 | 4 | 3 | 4 | 3 | 2   | 12 |
| 605 | 6 | 4 | 5 | 3 | 2 | 2   | 30 |

brand extension data

|     |   |   |   |   |   |     |    |
|-----|---|---|---|---|---|-----|----|
| 605 | 7 | 4 | 1 | 2 | 2 | 2.5 | 7  |
| 605 | 1 | 4 | 4 | 4 | 2 | 3.5 | 4  |
| 606 | 3 | 5 | 5 | 6 | 1 | 5.5 | 15 |
| 606 | 3 | 5 | 7 | 6 | 1 | 2   | 21 |
| 606 | 3 | 3 | 1 | 1 | 1 | 2   | 3  |
| 606 | 7 | 1 | 1 | 1 | 1 | 3.5 | 7  |
| 606 | 7 | 1 | 1 | 4 | 1 | 2   | 7  |
| 606 | 7 | 1 | 5 | 4 | 1 | 5   | 35 |
| 606 | 5 | 7 | 1 | 1 | 1 | 6   | 5  |
| 606 | 5 | 1 | 1 | 1 | 1 | 2   | 5  |
| 606 | 5 | 1 | 1 | 3 | 1 | 4   | 5  |
| 606 | 5 | 5 | 1 | 5 | 1 | 3   | 5  |
| 606 | 5 | 7 | 1 | 5 | 2 | 4   | 5  |
| 606 | 5 | 4 | 4 | 5 | 2 | 2.5 | 20 |
| 606 | 5 | 4 | 4 | 5 | 1 | 2   | 20 |
| 606 | 5 | 6 | 1 | 1 | 7 | 6   | 5  |
| 606 | 5 | 1 | 1 | 5 | 1 | 5   | 5  |
| 607 | 4 | 6 | 7 | 7 | 3 | 5   | 28 |
| 607 | 4 | 6 | 3 | 7 | 3 | 2.5 | 12 |
| 607 | 4 | 6 | 1 | 1 | 1 | 3   | 4  |
| 607 | 5 | 6 | 1 | 3 | 6 | 3   | 5  |
| 607 | 5 | 4 | 1 | 1 | 4 | 2.5 | 5  |
| 607 | 5 | 5 | 4 | 1 | 6 | 5.5 | 20 |
| 607 | 7 | 6 | 6 | 2 | 1 | 4.5 | 42 |
| 607 | 7 | 2 | 2 | 2 | 1 | 2   | 14 |
| 607 | 7 | 5 | 5 | 2 | 2 | 3.5 | 35 |
| 607 | 6 | 5 | 7 | 3 | 6 | 6.5 | 42 |
| 607 | 6 | 2 | 2 | 1 | 3 | 4   | 12 |
| 607 | 6 | 5 | 7 | 6 | 5 | 6.5 | 42 |
| 607 | 5 | 6 | 5 | 6 | 5 | 6   | 25 |
| 607 | 5 | 2 | 3 | 4 | 6 | 6   | 15 |
| 607 | 5 | 1 | 1 | 2 | 4 | 4   | 5  |
| 607 | 4 | 1 | 6 | 7 | 1 | 6   | 24 |
| 607 | 4 | 7 | 1 | 4 | 6 | 6   | 4  |
| 607 | 4 | 2 | 1 | 4 | 4 | 4   | 4  |
| 608 | 3 | 5 | 4 | 7 | 5 | 4   | 12 |
| 608 | 3 | 5 | 3 | 7 | 5 | 1.5 | 9  |
| 608 | 3 | 3 | 1 | 1 | 4 | 1.5 | 3  |
| 608 | 6 | 1 | 5 | 1 | 4 | 2.5 | 30 |
| 608 | 6 | 1 | 1 | 1 | 2 | 2   | 6  |
| 608 | 6 | 3 | 5 | 3 | 2 | 3   | 30 |
| 608 | 6 | 5 | 1 | 1 | 3 | 4.5 | 6  |
| 608 | 6 | 5 | 1 | 1 | 2 | 4   | 6  |
| 608 | 6 | 2 | 6 | 5 | 4 | 5   | 36 |
| 608 | 6 | 1 | 1 | 6 | 6 | 6.5 | 6  |
| 608 | 6 | 5 | 1 | 4 | 5 | 3   | 6  |
| 608 | 6 | 1 | 2 | 2 | 4 | 3.5 | 12 |
| 608 | 4 | 1 | 1 | 3 | 1 | 5   | 4  |
| 608 | 4 | 5 | 2 | 2 | 6 | 4.5 | 8  |
| 608 | 4 | 1 | 1 | 1 | 3 | 2   | 4  |
| 609 | 5 | 5 | 6 | 6 | 3 | 4   | 30 |

brand extension data

|     |   |   |   |   |   |     |    |
|-----|---|---|---|---|---|-----|----|
| 609 | 5 | 5 | 2 | 6 | 3 | 2.5 | 10 |
| 609 | 5 | 5 | 2 | 2 | 2 | 4   | 10 |
| 609 | 6 | 6 | 3 | 2 | 5 | 2   | 18 |
| 609 | 6 | 4 | 3 | 1 | 1 | 2.5 | 18 |
| 609 | 6 | 4 | 4 | 2 | 5 | 2.5 | 24 |
| 609 | 6 | 5 | 5 | 2 | 2 | 3.5 | 30 |
| 609 | 6 | 3 | 4 | 2 | 3 | 3.5 | 24 |
| 609 | 6 | 4 | 3 | 4 | 3 | 5   | 18 |
| 609 | 6 | 5 | 5 | 1 | 2 | 4   | 30 |
| 609 | 6 | 2 | 4 | 1 | 5 | 4.5 | 24 |
| 609 | 6 | 6 | 6 | 6 | 4 | 5   | 36 |
| 609 | 6 | 2 | 4 | 5 | 5 | 4   | 24 |
| 609 | 6 | 5 | 5 | 2 | 4 | 3   | 30 |
| 609 | 6 | 2 | 3 | 5 | 4 | 5   | 18 |
| 609 | 5 | 2 | 4 | 7 | 1 | 3.5 | 20 |
| 609 | 5 | 5 | 6 | 2 | 6 | 2.5 | 30 |
| 609 | 5 | 3 | 4 | 4 | 3 | 3.5 | 20 |
| 610 | 3 | 4 | 4 | 7 | 2 | 6   | 12 |
| 610 | 3 | 4 | 1 | 7 | 2 | 2   | 3  |
| 610 | 3 | 3 | 1 | 1 | 1 | 1.5 | 3  |
| 610 | 3 | 7 | 1 | 1 | 7 | 2   | 3  |
| 610 | 3 | 7 | 1 | 1 | 4 | 2   | 3  |
| 610 | 3 | 7 | 1 | 1 | 7 | 2   | 3  |
| 610 | 6 | 5 | 4 | 1 | 1 | 3   | 24 |
| 610 | 6 | 7 | 1 | 7 | 2 | 2.5 | 6  |
| 610 | 6 | 4 | 1 | 3 | 4 | 1.5 | 6  |
| 610 | 5 | 7 | 1 | 1 | 2 | 7   | 5  |
| 610 | 5 | 1 | 1 | 1 | 1 | 2   | 5  |
| 610 | 5 | 7 | 1 | 6 | 7 | 5.5 | 5  |
| 610 | 7 | 7 | 1 | 7 | 7 | 7   | 7  |
| 610 | 7 | 7 | 1 | 1 | 7 | 1.5 | 7  |
| 610 | 7 | 4 | 2 | 2 | 5 | 4   | 14 |
| 610 | 1 | 7 | 4 | 7 | 1 | 3   | 4  |
| 610 | 1 | 5 | 1 | 1 | 7 | 1.5 | 1  |
| 610 | 1 | 1 | 1 | 1 | 6 | 2   | 1  |
| 611 | 3 | 3 | 3 | 7 | 2 | 2.5 | 9  |
| 611 | 3 | 3 | 1 | 7 | 2 | 1.5 | 3  |
| 611 | 3 | 6 | 1 | 1 | 1 | 3   | 3  |
| 611 | 5 | 6 | 1 | 1 | 4 | 3.5 | 5  |
| 611 | 5 | 1 | 1 | 1 | 1 | 4   | 5  |
| 611 | 5 | 2 | 1 | 1 | 2 | 2.5 | 5  |
| 611 | 6 | 4 | 1 | 1 | 1 | 4   | 6  |
| 611 | 6 | 3 | 1 | 2 | 1 | 4.5 | 6  |
| 611 | 6 | 5 | 2 | 4 | 2 | 3.5 | 12 |
| 611 | 6 | 6 | 1 | 2 | 5 | 4   | 6  |
| 611 | 6 | 3 | 1 | 1 | 3 | 2   | 6  |
| 611 | 6 | 2 | 2 | 4 | 3 | 5   | 12 |
| 611 | 6 | 5 | 3 | 5 | 4 | 5   | 18 |
| 611 | 6 | 4 | 2 | 5 | 4 | 3   | 12 |
| 611 | 6 | 4 | 2 | 5 | 1 | 5.5 | 12 |
| 611 | 4 | 5 | 3 | 6 | 3 | 3.5 | 12 |

brand extension data

|     |   |   |   |   |   |     |    |
|-----|---|---|---|---|---|-----|----|
| 611 | 4 | 7 | 1 | 3 | 7 | 4   | 4  |
| 611 | 4 | 1 | 1 | 4 | 5 | 3.5 | 4  |
| 612 | 6 | 6 | 6 | 7 | 6 | 6   | 36 |
| 612 | 6 | 6 | 5 | 7 | 6 | 3.5 | 30 |
| 612 | 6 | 6 | 3 | 2 | 1 | 5.5 | 18 |
| 612 | 6 | 6 | 2 | 4 | 4 | 4.5 | 12 |
| 612 | 6 | 6 | 1 | 3 | 2 | 5   | 6  |
| 612 | 6 | 6 | 4 | 4 | 3 | 4   | 24 |
| 612 | 6 | 5 | 5 | 2 | 1 | 5.5 | 30 |
| 612 | 6 | 3 | 3 | 4 | 2 | 5   | 18 |
| 612 | 6 | 5 | 6 | 5 | 3 | 6   | 36 |
| 612 | 6 | 3 | 3 | 2 | 4 | 5.5 | 18 |
| 612 | 6 | 3 | 2 | 2 | 3 | 3   | 12 |
| 612 | 6 | 5 | 5 | 3 | 6 | 6   | 30 |
| 612 | 5 | 6 | 2 | 6 | 6 | 5.5 | 10 |
| 612 | 5 | 4 | 2 | 4 | 6 | 4   | 10 |
| 612 | 5 | 2 | 3 | 4 | 4 | 5   | 15 |
| 612 | 4 | 2 | 4 | 4 | 2 | 6   | 16 |
| 612 | 4 | 6 | 3 | 5 | 6 | 6   | 12 |
| 612 | 4 | 2 | 1 | 3 | 4 | 4   | 4  |
| 613 | 5 | 5 | 5 | 7 | 1 | 5.5 | 25 |
| 613 | 5 | 5 | 3 | 7 | 1 | 3.5 | 15 |
| 613 | 5 | 2 | 3 | 2 | 1 | 3   | 15 |
| 613 | 7 | 6 | 2 | 2 | 1 | 3.5 | 14 |
| 613 | 7 | 6 | 2 | 2 | 1 | 4   | 14 |
| 613 | 7 | 6 | 5 | 5 | 1 | 5.5 | 35 |
| 613 | 5 | 4 | 4 | 2 | 1 | 4   | 20 |
| 613 | 5 | 2 | 2 | 5 | 1 | 3   | 10 |
| 613 | 5 | 6 | 6 | 6 | 1 | 3   | 30 |
| 613 | 5 | 6 | 3 | 2 | 1 | 4.5 | 15 |
| 613 | 5 | 2 | 2 | 2 | 1 | 3.5 | 10 |
| 613 | 5 | 2 | 5 | 5 | 5 | 5.5 | 25 |
| 613 | 6 | 2 | 2 | 5 | 3 | 4   | 12 |
| 613 | 6 | 6 | 2 | 3 | 4 | 6   | 12 |
| 613 | 6 | 2 | 2 | 5 | 3 | 4   | 12 |
| 613 | 4 | 2 | 6 | 6 | 3 | 5   | 24 |
| 613 | 4 | 6 | 2 | 2 | 5 | 5   | 8  |
| 613 | 4 | 2 | 2 | 1 | 1 | 4   | 8  |
| 614 | 6 | 6 | 5 | 7 | 6 | 4   | 30 |
| 614 | 6 | 6 | 2 | 7 | 6 | 3   | 12 |
| 614 | 6 | 4 | 2 | 1 | 1 | 3   | 12 |
| 614 | 6 | 5 | 3 | 1 | 6 | 5   | 18 |
| 614 | 6 | 3 | 3 | 1 | 1 | 3   | 18 |
| 614 | 6 | 3 | 3 | 1 | 6 | 3.5 | 18 |
| 614 | 6 | 5 | 6 | 1 | 1 | 4   | 36 |
| 614 | 6 | 4 | 4 | 4 | 3 | 3   | 24 |
| 614 | 6 | 6 | 6 | 5 | 1 | 4   | 36 |
| 614 | 6 | 6 | 5 | 1 | 5 | 6.5 | 30 |
| 614 | 6 | 4 | 3 | 1 | 2 | 4.5 | 18 |
| 614 | 6 | 4 | 4 | 1 | 7 | 4.5 | 24 |
| 614 | 6 | 4 | 5 | 4 | 5 | 5   | 30 |

brand extension data

|     |   |   |   |   |   |     |    |
|-----|---|---|---|---|---|-----|----|
| 614 | 6 | 5 | 4 | 1 | 3 | 4.5 | 24 |
| 614 | 6 | 4 | 4 | 1 | 4 | 3.5 | 24 |
| 614 | 5 | 6 | 5 | 4 | 1 | 3.5 | 25 |
| 614 | 5 | 3 | 4 | 4 | 5 | 3.5 | 20 |
| 614 | 5 | 2 | 3 | 1 | 2 | 2.5 | 15 |
| 615 | 5 | 6 | 7 | 7 | 3 | 5.5 | 35 |
| 615 | 5 | 6 | 1 | 7 | 3 | 2.5 | 5  |
| 615 | 5 | 6 | 1 | 2 | 1 | 3.5 | 5  |
| 615 | 5 | 6 | 1 | 2 | 4 | 3.5 | 5  |
| 615 | 5 | 1 | 1 | 2 | 4 | 2   | 5  |
| 615 | 5 | 2 | 2 | 2 | 6 | 2.5 | 10 |
| 615 | 6 | 2 | 3 | 3 | 1 | 6   | 18 |
| 615 | 6 | 1 | 1 | 4 | 2 | 6   | 6  |
| 615 | 6 | 5 | 6 | 4 | 1 | 6.5 | 36 |
| 615 | 7 | 6 | 5 | 3 | 5 | 6.5 | 35 |
| 615 | 7 | 1 | 1 | 1 | 1 | 5   | 7  |
| 615 | 7 | 6 | 5 | 5 | 6 | 7   | 35 |
| 615 | 6 | 1 | 1 | 5 | 4 | 5   | 6  |
| 615 | 6 | 1 | 1 | 2 | 4 | 5.5 | 6  |
| 615 | 6 | 4 | 3 | 3 | 4 | 5   | 18 |
| 615 | 4 | 7 | 6 | 7 | 2 | 4.5 | 24 |
| 615 | 4 | 7 | 2 | 1 | 7 | 4   | 8  |
| 615 | 4 | 4 | 1 | 1 | 3 | 6   | 4  |
| 616 | 6 | 3 | 2 | 7 | 4 | 6.5 | 12 |
| 616 | 6 | 3 | 4 | 7 | 4 | 6.5 | 24 |
| 616 | 6 | 5 | 1 | 4 | 3 | 5.5 | 6  |
| 616 | 6 | 5 | 1 | 2 | 3 | 6.5 | 6  |
| 616 | 6 | 5 | 1 | 2 | 5 | 7   | 6  |
| 616 | 6 | 5 | 1 | 5 | 5 | 6.5 | 6  |
| 616 | 7 | 6 | 1 | 4 | 4 | 7   | 7  |
| 616 | 7 | 4 | 1 | 4 | 3 | 7   | 7  |
| 616 | 7 | 5 | 2 | 7 | 5 | 7   | 14 |
| 616 | 7 | 5 | 1 | 6 | 7 | 7   | 7  |
| 616 | 7 | 7 | 1 | 4 | 6 | 5.5 | 7  |
| 616 | 7 | 6 | 6 | 4 | 5 | 6   | 42 |
| 616 | 4 | 7 | 1 | 7 | 5 | 6   | 4  |
| 616 | 4 | 4 | 1 | 3 | 7 | 4.5 | 4  |
| 616 | 4 | 5 | 1 | 2 | 6 | 4   | 4  |
| 617 | 6 | 6 | 3 | 7 | 2 | 5.5 | 18 |
| 617 | 6 | 6 | 7 | 7 | 2 | 4   | 42 |
| 617 | 6 | 4 | 3 | 1 | 1 | 3   | 18 |
| 617 | 5 | 7 | 1 | 1 | 3 | 4.5 | 5  |
| 617 | 5 | 4 | 1 | 3 | 2 | 4.5 | 5  |
| 617 | 5 | 5 | 2 | 1 | 4 | 3   | 10 |
| 617 | 7 | 6 | 5 | 3 | 1 | 6.5 | 35 |
| 617 | 7 | 2 | 2 | 3 | 1 | 3   | 14 |
| 617 | 7 | 5 | 6 | 6 | 2 | 5.5 | 42 |
| 617 | 7 | 4 | 4 | 2 | 2 | 6   | 28 |
| 617 | 7 | 1 | 2 | 1 | 1 | 3   | 14 |
| 617 | 7 | 6 | 4 | 6 | 5 | 6   | 28 |
| 617 | 6 | 1 | 1 | 6 | 5 | 4.5 | 6  |

brand extension data

|     |   |   |   |   |   |     |    |
|-----|---|---|---|---|---|-----|----|
| 617 | 6 | 2 | 3 | 2 | 5 | 3   | 18 |
| 617 | 6 | 4 | 2 | 2 | 4 | 6.5 | 12 |
| 617 | 7 | 1 | 6 | 7 | 2 | 6   | 42 |
| 617 | 7 | 7 | 3 | 4 | 6 | 6.5 | 21 |
| 617 | 7 | 1 | 1 | 1 | 3 | 3   | 7  |
| 618 | 5 | 6 | 4 | 7 | 6 | 6   | 20 |
| 618 | 5 | 6 | 6 | 7 | 6 | 1   | 30 |
| 618 | 5 | 5 | 2 | 2 | 2 | 1   | 10 |
| 618 | 5 | 7 | 2 | 2 | 7 | 4   | 10 |
| 618 | 5 | 5 | 2 | 2 | 4 | 1   | 10 |
| 618 | 5 | 6 | 2 | 3 | 3 | 2.5 | 10 |
| 618 | 6 | 1 | 2 | 2 | 2 | 1   | 12 |
| 618 | 6 | 1 | 2 | 2 | 3 | 1   | 12 |
| 618 | 6 | 1 | 2 | 2 | 3 | 1   | 12 |
| 618 | 7 | 5 | 2 | 2 | 3 | 1   | 14 |
| 618 | 7 | 1 | 2 | 1 | 3 | 1   | 14 |
| 618 | 7 | 3 | 3 | 3 | 5 | 3   | 21 |
| 618 | 7 | 6 | 3 | 6 | 5 | 4   | 21 |
| 618 | 7 | 7 | 2 | 5 | 5 | 1   | 14 |
| 618 | 7 | 7 | 4 | 7 | 5 | 4.5 | 28 |
| 618 | 3 | 7 | 4 | 7 | 3 | 4   | 12 |
| 618 | 3 | 3 | 2 | 3 | 3 | 1   | 6  |
| 618 | 3 | 2 | 1 | 1 | 5 | 1   | 3  |
| 619 | 6 | 7 | 7 | 7 | 3 | 3.5 | 42 |
| 619 | 6 | 7 | 7 | 7 | 3 | 4   | 42 |
| 619 | 6 | 7 | 4 | 4 | 2 | 4.5 | 24 |
| 619 | 6 | 7 | 1 | 1 | 6 | 2   | 6  |
| 619 | 6 | 3 | 2 | 1 | 4 | 2.5 | 12 |
| 619 | 6 | 3 | 1 | 2 | 5 | 4.5 | 6  |
| 619 | 6 | 5 | 2 | 1 | 2 | 2   | 12 |
| 619 | 6 | 1 | 1 | 6 | 2 | 2   | 6  |
| 619 | 6 | 7 | 5 | 2 | 4 | 3.5 | 30 |
| 619 | 6 | 1 | 1 | 1 | 3 | 2   | 6  |
| 619 | 6 | 7 | 5 | 6 | 6 | 5.5 | 30 |
| 619 | 6 | 3 | 3 | 7 | 6 | 5   | 18 |
| 619 | 6 | 6 | 3 | 7 | 7 | 3.5 | 18 |
| 619 | 6 | 6 | 6 | 6 | 6 | 4.5 | 36 |
| 619 | 4 | 2 | 5 | 7 | 2 | 6   | 20 |
| 619 | 4 | 6 | 4 | 2 | 7 | 4   | 16 |
| 619 | 4 | 1 | 1 | 1 | 5 | 2   | 4  |
| 620 | 6 | 6 | 5 | 7 | 5 | 5.5 | 30 |
| 620 | 6 | 6 | 3 | 7 | 5 | 4   | 18 |
| 620 | 6 | 4 | 1 | 4 | 3 | 3.5 | 6  |
| 620 | 5 | 7 | 4 | 3 | 5 | 4   | 20 |
| 620 | 5 | 5 | 2 | 5 | 4 | 4   | 10 |
| 620 | 5 | 6 | 3 | 6 | 6 | 4.5 | 15 |
| 620 | 6 | 3 | 4 | 6 | 3 | 5   | 24 |
| 620 | 6 | 3 | 4 | 6 | 3 | 5   | 24 |
| 620 | 6 | 3 | 4 | 5 | 2 | 4.5 | 24 |
| 620 | 6 | 4 | 5 | 3 | 5 | 6   | 30 |
| 620 | 6 | 2 | 3 | 2 | 4 | 5.5 | 18 |

brand extension data

|     |   |   |   |   |   |     |    |
|-----|---|---|---|---|---|-----|----|
| 620 | 6 | 5 | 5 | 6 | 6 | 6   | 30 |
| 620 | 6 | 2 | 1 | 6 | 5 | 5   | 6  |
| 620 | 6 | 7 | 1 | 3 | 6 | 4   | 6  |
| 620 | 6 | 2 | 1 | 4 | 4 | 4.5 | 6  |
| 620 | 4 | 7 | 4 | 7 | 2 | 5   | 16 |
| 620 | 4 | 7 | 2 | 3 | 4 | 2.5 | 8  |
| 620 | 4 | 3 | 1 | 1 | 4 | 2.5 | 4  |
| 621 | 5 | 6 | 1 | 7 | 3 | 2.5 | 5  |
| 621 | 5 | 6 | 3 | 7 | 3 | 2.5 | 15 |
| 621 | 5 | 5 | 1 | 1 | 1 | 1.5 | 5  |
| 621 | 6 | 7 | 2 | 3 | 5 | 5.5 | 12 |
| 621 | 6 | 3 | 5 | 2 | 4 | 2.5 | 30 |
| 621 | 6 | 7 | 6 | 3 | 7 | 5   | 36 |
| 621 | 5 | 2 | 3 | 1 | 1 | 2   | 15 |
| 621 | 5 | 1 | 2 | 3 | 3 | 6   | 10 |
| 621 | 5 | 4 | 4 | 5 | 3 | 5   | 20 |
| 621 | 7 | 7 | 4 | 7 | 5 | 7   | 28 |
| 621 | 7 | 1 | 1 | 1 | 1 | 1.5 | 7  |
| 621 | 7 | 7 | 6 | 7 | 6 | 6.5 | 42 |
| 621 | 7 | 4 | 5 | 7 | 7 | 6.5 | 35 |
| 621 | 7 | 7 | 4 | 5 | 7 | 3.5 | 28 |
| 621 | 7 | 4 | 3 | 7 | 5 | 6.5 | 21 |
| 621 | 2 | 1 | 4 | 4 | 1 | 3   | 8  |
| 621 | 2 | 5 | 1 | 1 | 2 | 1   | 2  |
| 621 | 2 | 1 | 1 | 3 | 2 | 2.5 | 2  |
| 622 | 7 | 7 | 7 | 7 | 6 | 6   | 49 |
| 622 | 7 | 7 | 3 | 7 | 6 | 1   | 21 |
| 622 | 7 | 1 | 1 | 1 | 1 | 1.5 | 7  |
| 622 | 6 | 7 | 1 | 1 | 4 | 6.5 | 6  |
| 622 | 6 | 5 | 1 | 1 | 2 | 2   | 6  |
| 622 | 6 | 7 | 1 | 1 | 4 | 3.5 | 6  |
| 622 | 7 | 5 | 6 | 3 | 1 | 5   | 42 |
| 622 | 7 | 1 | 2 | 1 | 1 | 1   | 14 |
| 622 | 7 | 7 | 6 | 5 | 3 | 6.5 | 42 |
| 622 | 7 | 7 | 1 | 1 | 3 | 5.5 | 7  |
| 622 | 7 | 1 | 1 | 1 | 1 | 3.5 | 7  |
| 622 | 7 | 5 | 3 | 5 | 5 | 6.5 | 21 |
| 622 | 4 | 1 | 1 | 5 | 4 | 2.5 | 4  |
| 622 | 4 | 7 | 1 | 2 | 5 | 2.5 | 4  |
| 622 | 4 | 2 | 4 | 1 | 3 | 4   | 16 |
| 622 | 3 | 1 | 1 | 4 | 2 | 2   | 3  |
| 622 | 3 | 4 | 1 | 1 | 7 | 3.5 | 3  |
| 622 | 3 | 1 | 1 | 1 | 4 | 5   | 3  |
| 623 | 3 | 6 | 6 | 6 | 6 | 3   | 18 |
| 623 | 3 | 6 | 5 | 6 | 6 | 2.5 | 15 |
| 623 | 3 | 2 | 1 | 1 | 1 | 1.5 | 3  |
| 623 | 4 | 3 | 4 | 4 | 1 | 3.5 | 16 |
| 623 | 4 | 3 | 4 | 3 | 4 | 5.5 | 16 |
| 623 | 4 | 6 | 7 | 5 | 4 | 6   | 28 |
| 623 | 5 | 5 | 1 | 3 | 5 | 2.5 | 5  |
| 623 | 5 | 3 | 1 | 2 | 5 | 2.5 | 5  |

brand extension data

|     |   |   |   |   |   |     |    |
|-----|---|---|---|---|---|-----|----|
| 623 | 5 | 6 | 4 | 2 | 4 | 4.5 | 20 |
| 623 | 6 | 1 | 3 | 4 | 5 | 4.5 | 18 |
| 623 | 6 | 6 | 1 | 2 | 5 | 2   | 6  |
| 623 | 6 | 4 | 5 | 4 | 3 | 4.5 | 30 |
| 623 | 6 | 6 | 6 | 6 | 2 | 4.5 | 36 |
| 623 | 6 | 6 | 1 | 2 | 6 | 5.5 | 6  |
| 623 | 6 | 1 | 1 | 3 | 2 | 4.5 | 6  |
| 624 | 4 | 6 | 4 | 7 | 3 | 4   | 16 |
| 624 | 4 | 6 | 1 | 7 | 3 | 3.5 | 4  |
| 624 | 4 | 4 | 1 | 3 | 1 | 3   | 4  |
| 624 | 4 | 5 | 2 | 4 | 5 | 2.5 | 8  |
| 624 | 4 | 3 | 1 | 2 | 2 | 3.5 | 4  |
| 624 | 4 | 3 | 4 | 4 | 5 | 5.5 | 16 |
| 624 | 2 | 7 | 6 | 6 | 1 | 3.5 | 12 |
| 624 | 2 | 3 | 2 | 4 | 4 | 4   | 4  |
| 624 | 2 | 7 | 7 | 7 | 2 | 3   | 14 |
| 624 | 6 | 6 | 3 | 4 | 2 | 4.5 | 18 |
| 624 | 6 | 3 | 2 | 2 | 2 | 4.5 | 12 |
| 624 | 6 | 7 | 5 | 6 | 3 | 6   | 30 |
| 624 | 7 | 6 | 2 | 7 | 7 | 6.5 | 14 |
| 624 | 7 | 6 | 1 | 5 | 7 | 7   | 7  |
| 624 | 7 | 4 | 5 | 6 | 6 | 7   | 35 |
| 624 | 1 | 7 | 7 | 7 | 2 | 2   | 7  |
| 624 | 1 | 5 | 4 | 3 | 5 | 2   | 4  |
| 624 | 1 | 4 | 2 | 2 | 4 | 3   | 2  |
| 625 | 3 | 5 | 4 | 7 | 2 | 2   | 12 |
| 625 | 3 | 5 | 3 | 7 | 2 | 1.5 | 9  |
| 625 | 3 | 3 | 1 | 3 | 1 | 1.5 | 3  |
| 625 | 4 | 7 | 1 | 7 | 7 | 3.5 | 4  |
| 625 | 4 | 7 | 2 | 5 | 2 | 2.5 | 8  |
| 625 | 4 | 4 | 5 | 3 | 4 | 3.5 | 20 |
| 625 | 7 | 6 | 5 | 5 | 1 | 6.5 | 35 |
| 625 | 7 | 1 | 1 | 6 | 1 | 4   | 7  |
| 625 | 7 | 6 | 5 | 6 | 2 | 5   | 35 |
| 625 | 6 | 6 | 2 | 2 | 2 | 6.5 | 12 |
| 625 | 6 | 4 | 3 | 2 | 1 | 7   | 18 |
| 625 | 6 | 5 | 3 | 4 | 5 | 6   | 18 |
| 625 | 6 | 5 | 2 | 6 | 5 | 5.5 | 12 |
| 625 | 6 | 6 | 2 | 4 | 6 | 4.5 | 12 |
| 625 | 6 | 2 | 4 | 2 | 6 | 6   | 24 |
| 625 | 2 | 7 | 6 | 6 | 1 | 3   | 12 |
| 625 | 2 | 7 | 5 | 4 | 7 | 3   | 10 |
| 625 | 2 | 2 | 2 | 2 | 6 | 4   | 4  |
| 626 | 5 | 6 | 7 | 7 | 5 | 5.5 | 35 |
| 626 | 5 | 6 | 6 | 7 | 5 | 4.5 | 30 |
| 626 | 5 | 3 | 2 | 2 | 1 | 5   | 10 |
| 626 | 3 | 7 | 1 | 1 | 3 | 3   | 3  |
| 626 | 3 | 4 | 2 | 1 | 2 | 3   | 6  |
| 626 | 3 | 6 | 3 | 3 | 7 | 3.5 | 9  |
| 626 | 7 | 7 | 4 | 4 | 1 | 6.5 | 28 |
| 626 | 7 | 1 | 1 | 3 | 1 | 6   | 7  |

brand extension data

|     |   |   |   |   |   |     |    |
|-----|---|---|---|---|---|-----|----|
| 626 | 7 | 3 | 7 | 6 | 2 | 6.5 | 49 |
| 626 | 6 | 7 | 5 | 2 | 4 | 5.5 | 30 |
| 626 | 6 | 4 | 3 | 1 | 1 | 6   | 18 |
| 626 | 6 | 5 | 6 | 3 | 5 | 5.5 | 36 |
| 626 | 6 | 1 | 1 | 7 | 6 | 4.5 | 6  |
| 626 | 6 | 6 | 1 | 5 | 7 | 4.5 | 6  |
| 626 | 6 | 3 | 5 | 6 | 6 | 5.5 | 30 |
| 626 | 3 | 4 | 5 | 7 | 3 | 2.5 | 15 |
| 626 | 3 | 5 | 2 | 1 | 7 | 4   | 6  |
| 626 | 3 | 1 | 1 | 1 | 4 | 4   | 3  |
| 627 | 5 | 5 | 4 | 7 | 4 | 5   | 20 |
| 627 | 5 | 5 | 2 | 7 | 4 | 3   | 10 |
| 627 | 5 | 7 | 1 | 1 | 1 | 3   | 5  |
| 627 | 5 | 6 | 1 | 1 | 5 | 4.5 | 5  |
| 627 | 5 | 3 | 1 | 1 | 1 | 3.5 | 5  |
| 627 | 5 | 1 | 1 | 1 | 6 | 3   | 5  |
| 627 | 7 | 3 | 5 | 1 | 1 | 7   | 35 |
| 627 | 7 | 1 | 1 | 5 | 2 | 4.5 | 7  |
| 627 | 7 | 3 | 6 | 7 | 4 | 7   | 42 |
| 627 | 6 | 4 | 1 | 2 | 4 | 5.5 | 6  |
| 627 | 6 | 1 | 1 | 1 | 1 | 5.5 | 6  |
| 627 | 6 | 7 | 5 | 6 | 4 | 5   | 30 |
| 627 | 7 | 5 | 1 | 6 | 6 | 6.5 | 7  |
| 627 | 7 | 7 | 1 | 6 | 6 | 6.5 | 7  |
| 627 | 7 | 3 | 1 | 6 | 5 | 7   | 7  |
| 627 | 6 | 6 | 6 | 6 | 1 | 6.5 | 36 |
| 627 | 6 | 6 | 2 | 3 | 4 | 6.5 | 12 |
| 627 | 6 | 6 | 2 | 2 | 2 | 3   | 12 |
| 628 | 2 | 6 | 5 | 7 | 6 | 1.5 | 10 |
| 628 | 2 | 6 | 3 | 7 | 6 | 1   | 6  |
| 628 | 2 | 5 | 1 | 2 | 1 | 1   | 2  |
| 628 | 5 | 7 | 1 | 4 | 5 | 4.5 | 5  |
| 628 | 5 | 7 | 1 | 3 | 4 | 5   | 5  |
| 628 | 5 | 7 | 1 | 6 | 7 | 4.5 | 5  |
| 628 | 5 | 6 | 6 | 5 | 1 | 4.5 | 30 |
| 628 | 5 | 1 | 1 | 6 | 3 | 2.5 | 5  |
| 628 | 5 | 1 | 5 | 6 | 3 | 5   | 25 |
| 628 | 6 | 6 | 1 | 3 | 5 | 6   | 6  |
| 628 | 6 | 1 | 1 | 1 | 3 | 4.5 | 6  |
| 628 | 6 | 6 | 1 | 7 | 7 | 6   | 6  |
| 628 | 7 | 6 | 1 | 7 | 6 | 6   | 7  |
| 628 | 7 | 6 | 1 | 2 | 7 | 2.5 | 7  |
| 628 | 7 | 6 | 5 | 5 | 5 | 7   | 35 |
| 628 | 1 | 1 | 1 | 5 | 3 | 3   | 1  |
| 628 | 1 | 6 | 1 | 4 | 5 | 1   | 1  |
| 628 | 1 | 1 | 1 | 5 | 4 | 1   | 1  |
| 629 | 4 | 6 | 7 | 7 | 4 | 4   | 28 |
| 629 | 4 | 6 | 5 | 7 | 4 | 3.5 | 20 |
| 629 | 4 | 6 | 1 | 1 | 1 | 2   | 4  |
| 629 | 6 | 1 | 1 | 1 | 1 | 1.5 | 6  |
| 629 | 6 | 2 | 5 | 4 | 3 | 4.5 | 30 |

brand extension data

|     |   |   |   |   |   |     |    |
|-----|---|---|---|---|---|-----|----|
| 629 | 6 | 5 | 4 | 5 | 2 | 5.5 | 24 |
| 629 | 6 | 6 | 2 | 1 | 4 | 4   | 12 |
| 629 | 6 | 2 | 2 | 1 | 1 | 2   | 12 |
| 629 | 6 | 6 | 6 | 6 | 5 | 6   | 36 |
| 629 | 5 | 6 | 6 | 6 | 7 | 5   | 30 |
| 629 | 5 | 1 | 1 | 1 | 7 | 2   | 5  |
| 629 | 5 | 5 | 5 | 5 | 6 | 3   | 25 |
| 629 | 1 | 6 | 7 | 6 | 1 | 5.5 | 7  |
| 629 | 1 | 3 | 3 | 1 | 7 | 4.5 | 3  |
| 629 | 1 | 2 | 2 | 1 | 5 | 5   | 2  |
| 630 | 5 | 1 | 1 | 7 | 3 | 5   | 5  |
| 630 | 5 | 1 | 7 | 7 | 3 | 2   | 35 |
| 630 | 5 | 3 | 4 | 1 | 2 | 1.5 | 20 |
| 630 | 5 | 5 | 5 | 2 | 4 | 5.5 | 25 |
| 630 | 5 | 5 | 5 | 2 | 2 | 2   | 25 |
| 630 | 5 | 6 | 2 | 1 | 6 | 3   | 10 |
| 630 | 7 | 2 | 6 | 1 | 2 | 4.5 | 42 |
| 630 | 7 | 2 | 2 | 3 | 1 | 6.5 | 14 |
| 630 | 7 | 1 | 3 | 2 | 4 | 6   | 21 |
| 630 | 5 | 6 | 6 | 1 | 5 | 6   | 30 |
| 630 | 5 | 5 | 3 | 1 | 2 | 3   | 15 |
| 630 | 5 | 3 | 7 | 6 | 5 | 6.5 | 35 |
| 630 | 7 | 2 | 5 | 6 | 7 | 6.5 | 35 |
| 630 | 7 | 6 | 4 | 6 | 5 | 1.5 | 28 |
| 630 | 7 | 4 | 4 | 3 | 3 | 3   | 28 |
| 630 | 4 | 2 | 5 | 2 | 2 | 7   | 20 |
| 630 | 4 | 6 | 3 | 1 | 7 | 7   | 12 |
| 630 | 4 | 1 | 6 | 1 | 5 | 1   | 24 |
| 631 | 5 | 6 | 5 | 7 | 5 | 4   | 25 |
| 631 | 5 | 6 | 6 | 7 | 5 | 3   | 30 |
| 631 | 5 | 2 | 2 | 1 | 2 | 3   | 10 |
| 631 | 6 | 6 | 5 | 3 | 5 | 5   | 30 |
| 631 | 6 | 5 | 2 | 2 | 3 | 5   | 12 |
| 631 | 6 | 2 | 2 | 5 | 4 | 4   | 12 |
| 631 | 6 | 3 | 2 | 4 | 2 | 4.5 | 12 |
| 631 | 6 | 2 | 2 | 2 | 1 | 6   | 12 |
| 631 | 6 | 5 | 3 | 5 | 2 | 5   | 18 |
| 631 | 6 | 4 | 3 | 1 | 3 | 5.5 | 18 |
| 631 | 6 | 2 | 1 | 1 | 1 | 5   | 6  |
| 631 | 6 | 5 | 5 | 6 | 5 | 3.5 | 30 |
| 631 | 6 | 6 | 1 | 5 | 6 | 5.5 | 6  |
| 631 | 6 | 2 | 2 | 1 | 5 | 4.5 | 12 |
| 631 | 6 | 2 | 2 | 3 | 4 | 5.5 | 12 |
| 631 | 4 | 1 | 5 | 5 | 1 | 3   | 20 |
| 631 | 4 | 6 | 1 | 1 | 6 | 2   | 4  |
| 631 | 4 | 1 | 2 | 1 | 4 | 4   | 8  |
| 632 | 5 | 1 | 1 | 7 | 6 | 4   | 5  |
| 632 | 5 | 1 | 3 | 7 | 6 | 1.5 | 15 |
| 632 | 5 | 7 | 2 | 4 | 2 | 5   | 10 |
| 632 | 7 | 7 | 1 | 2 | 7 | 5   | 7  |
| 632 | 7 | 7 | 1 | 2 | 4 | 5   | 7  |

brand extension data

|     |   |   |   |   |   |     |    |
|-----|---|---|---|---|---|-----|----|
| 632 | 7 | 7 | 4 | 4 | 6 | 5.5 | 28 |
| 632 | 7 | 3 | 1 | 2 | 2 | 6   | 7  |
| 632 | 7 | 1 | 5 | 5 | 2 | 6   | 35 |
| 632 | 7 | 7 | 7 | 6 | 6 | 7   | 49 |
| 632 | 7 | 7 | 5 | 1 | 7 | 7   | 35 |
| 632 | 7 | 7 | 5 | 1 | 6 | 7   | 35 |
| 632 | 7 | 5 | 6 | 5 | 6 | 7   | 42 |
| 632 | 7 | 7 | 6 | 6 | 6 | 6   | 42 |
| 632 | 7 | 7 | 1 | 2 | 7 | 2.5 | 7  |
| 632 | 7 | 7 | 2 | 5 | 5 | 6   | 14 |
| 632 | 5 | 1 | 7 | 7 | 2 | 6.5 | 35 |
| 632 | 5 | 7 | 1 | 1 | 6 | 3   | 5  |
| 632 | 5 | 5 | 1 | 1 | 4 | 4.5 | 5  |
| 633 | 7 | 7 | 7 | 7 | 3 | 6.5 | 49 |
| 633 | 7 | 7 | 4 | 7 | 3 | 4.5 | 28 |
| 633 | 7 | 6 | 2 | 1 | 1 | 3   | 14 |
| 633 | 1 | 7 | 1 | 5 | 5 | 1.5 | 1  |
| 633 | 1 | 4 | 2 | 1 | 4 | 2   | 2  |
| 633 | 1 | 2 | 2 | 2 | 5 | 2   | 2  |
| 633 | 7 | 2 | 3 | 4 | 1 | 7   | 21 |
| 633 | 7 | 2 | 3 | 4 | 3 | 5   | 21 |
| 633 | 7 | 7 | 6 | 6 | 2 | 6.5 | 42 |
| 633 | 7 | 7 | 3 | 2 | 3 | 7   | 21 |
| 633 | 7 | 6 | 3 | 2 | 3 | 6.5 | 21 |
| 633 | 7 | 5 | 6 | 4 | 4 | 7   | 42 |
| 633 | 6 | 4 | 5 | 5 | 6 | 4   | 30 |
| 633 | 6 | 6 | 2 | 3 | 5 | 3.5 | 12 |
| 633 | 6 | 1 | 2 | 2 | 2 | 3   | 12 |
| 633 | 5 | 6 | 7 | 7 | 1 | 5.5 | 35 |
| 633 | 5 | 6 | 1 | 1 | 7 | 4   | 5  |
| 633 | 5 | 1 | 1 | 1 | 3 | 2   | 5  |
| 634 | 7 | 5 | 6 | 7 | 4 | 7   | 42 |
| 634 | 7 | 5 | 3 | 7 | 4 | 3   | 21 |
| 634 | 7 | 7 | 5 | 2 | 1 | 4.5 | 35 |
| 634 | 5 | 7 | 2 | 3 | 4 | 2.5 | 10 |
| 634 | 5 | 5 | 5 | 4 | 2 | 3.5 | 25 |
| 634 | 5 | 5 | 6 | 5 | 3 | 4.5 | 30 |
| 634 | 7 | 2 | 7 | 3 | 1 | 4   | 49 |
| 634 | 7 | 2 | 6 | 5 | 4 | 5.5 | 42 |
| 634 | 7 | 5 | 7 | 6 | 3 | 6.5 | 49 |
| 634 | 6 | 6 | 3 | 2 | 4 | 5.5 | 18 |
| 634 | 6 | 2 | 1 | 1 | 3 | 5   | 6  |
| 634 | 6 | 6 | 5 | 6 | 5 | 6   | 30 |
| 634 | 7 | 2 | 3 | 7 | 6 | 6   | 21 |
| 634 | 7 | 5 | 5 | 3 | 6 | 6   | 35 |
| 634 | 7 | 2 | 6 | 6 | 6 | 6.5 | 42 |
| 634 | 4 | 2 | 7 | 7 | 1 | 6.5 | 28 |
| 634 | 4 | 7 | 5 | 4 | 7 | 7   | 20 |
| 634 | 4 | 5 | 1 | 4 | 3 | 5   | 4  |
| 635 | 7 | 7 | 7 | 7 | 5 | 6.5 | 49 |
| 635 | 7 | 7 | 2 | 7 | 5 | 1   | 14 |

brand extension data

|     |   |   |   |   |   |     |    |
|-----|---|---|---|---|---|-----|----|
| 635 | 7 | 5 | 1 | 1 | 2 | 2   | 7  |
| 635 | 6 | 5 | 1 | 1 | 5 | 5   | 6  |
| 635 | 6 | 5 | 1 | 1 | 3 | 2   | 6  |
| 635 | 6 | 5 | 1 | 1 | 6 | 3.5 | 6  |
| 635 | 6 | 4 | 2 | 1 | 2 | 2   | 12 |
| 635 | 6 | 1 | 1 | 4 | 2 | 1.5 | 6  |
| 635 | 6 | 4 | 2 | 3 | 2 | 6   | 12 |
| 635 | 5 | 2 | 1 | 1 | 4 | 4   | 5  |
| 635 | 5 | 1 | 1 | 1 | 2 | 1.5 | 5  |
| 635 | 5 | 4 | 1 | 2 | 4 | 3   | 5  |
| 635 | 6 | 1 | 1 | 1 | 5 | 5   | 6  |
| 635 | 6 | 1 | 1 | 1 | 4 | 1.5 | 6  |
| 635 | 6 | 3 | 2 | 4 | 4 | 3.5 | 12 |
| 635 | 2 | 1 | 2 | 5 | 2 | 5.5 | 4  |
| 635 | 2 | 5 | 1 | 1 | 6 | 6   | 2  |
| 635 | 2 | 1 | 1 | 4 | 3 | 2.5 | 2  |
| 636 | 6 | 6 | 6 | 7 | 5 | 5.5 | 36 |
| 636 | 6 | 6 | 5 | 7 | 5 | 2.5 | 30 |
| 636 | 6 | 6 | 1 | 1 | 2 | 4   | 6  |
| 636 | 6 | 6 | 1 | 4 | 4 | 4   | 6  |
| 636 | 6 | 6 | 1 | 3 | 4 | 5.5 | 6  |
| 636 | 6 | 6 | 1 | 4 | 4 | 5.5 | 6  |
| 636 | 6 | 6 | 5 | 4 | 2 | 4   | 30 |
| 636 | 6 | 6 | 4 | 5 | 2 | 5.5 | 24 |
| 636 | 6 | 6 | 6 | 6 | 2 | 5.5 | 36 |
| 636 | 6 | 6 | 2 | 2 | 4 | 5.5 | 12 |
| 636 | 6 | 6 | 2 | 2 | 3 | 5.5 | 12 |
| 636 | 6 | 6 | 4 | 6 | 5 | 5.5 | 24 |
| 636 | 6 | 3 | 3 | 6 | 5 | 5.5 | 18 |
| 636 | 6 | 3 | 2 | 2 | 5 | 4   | 12 |
| 636 | 6 | 3 | 2 | 2 | 5 | 5.5 | 12 |
| 636 | 4 | 3 | 4 | 6 | 2 | 4   | 16 |
| 636 | 4 | 7 | 2 | 2 | 5 | 5   | 8  |
| 636 | 4 | 2 | 2 | 2 | 2 | 2.5 | 8  |
| 637 | 3 | 6 | 7 | 7 | 2 | 5.5 | 21 |
| 637 | 3 | 6 | 6 | 7 | 2 | 4   | 18 |
| 637 | 3 | 5 | 6 | 4 | 1 | 4.5 | 18 |
| 637 | 5 | 6 | 2 | 5 | 7 | 3   | 10 |
| 637 | 5 | 5 | 3 | 4 | 5 | 2   | 15 |
| 637 | 5 | 4 | 2 | 4 | 5 | 2.5 | 10 |
| 637 | 6 | 2 | 3 | 1 | 1 | 4.5 | 18 |
| 637 | 6 | 7 | 6 | 3 | 3 | 4   | 36 |
| 637 | 6 | 3 | 2 | 1 | 2 | 5   | 12 |
| 637 | 6 | 6 | 6 | 6 | 6 | 6   | 36 |
| 637 | 5 | 2 | 1 | 7 | 6 | 3.5 | 5  |
| 637 | 5 | 2 | 6 | 5 | 6 | 4   | 30 |
| 637 | 5 | 2 | 3 | 3 | 4 | 6   | 15 |
| 637 | 4 | 6 | 6 | 7 | 1 | 4.5 | 24 |
| 637 | 4 | 6 | 4 | 5 | 6 | 6.5 | 16 |
| 637 | 4 | 1 | 2 | 5 | 3 | 1   | 8  |
| 638 | 1 | 7 | 1 | 5 | 1 | 1   | 1  |

brand extension data

|     |   |   |   |   |   |     |    |
|-----|---|---|---|---|---|-----|----|
| 638 | 1 | 7 | 1 | 5 | 1 | 1   | 1  |
| 638 | 1 | 5 | 1 | 1 | 1 | 1   | 1  |
| 638 | 4 | 7 | 1 | 1 | 3 | 2.5 | 4  |
| 638 | 4 | 3 | 1 | 1 | 3 | 3   | 4  |
| 638 | 4 | 3 | 1 | 1 | 3 | 2   | 4  |
| 638 | 5 | 6 | 6 | 6 | 1 | 2.5 | 30 |
| 638 | 5 | 2 | 1 | 2 | 3 | 3.5 | 5  |
| 638 | 5 | 7 | 5 | 6 | 2 | 5   | 25 |
| 638 | 7 | 5 | 1 | 3 | 7 | 7   | 7  |
| 638 | 7 | 2 | 1 | 2 | 3 | 3   | 7  |
| 638 | 7 | 7 | 5 | 5 | 7 | 3.5 | 35 |
| 638 | 7 | 2 | 1 | 4 | 4 | 6   | 7  |
| 638 | 7 | 7 | 1 | 2 | 3 | 2   | 7  |
| 638 | 7 | 3 | 7 | 3 | 3 | 5.5 | 49 |
| 638 | 1 | 7 | 6 | 7 | 1 | 1   | 6  |
| 638 | 1 | 6 | 1 | 2 | 3 | 1   | 1  |
| 638 | 1 | 1 | 1 | 2 | 3 | 1   | 1  |
| 639 | 4 | 2 | 6 | 4 | 4 | 4   | 24 |
| 639 | 4 | 2 | 2 | 4 | 4 | 2   | 8  |
| 639 | 4 | 4 | 1 | 2 | 2 | 2   | 4  |
| 639 | 3 | 5 | 1 | 2 | 3 | 3   | 3  |
| 639 | 3 | 5 | 1 | 2 | 2 | 3   | 3  |
| 639 | 3 | 5 | 1 | 1 | 4 | 4   | 3  |
| 639 | 5 | 6 | 5 | 2 | 2 | 4   | 25 |
| 639 | 5 | 2 | 1 | 2 | 2 | 4   | 5  |
| 639 | 5 | 5 | 5 | 4 | 1 | 4   | 25 |
| 639 | 5 | 6 | 2 | 2 | 2 | 4   | 10 |
| 639 | 5 | 2 | 1 | 1 | 1 | 4.5 | 5  |
| 639 | 5 | 5 | 4 | 3 | 4 | 4.5 | 20 |
| 639 | 5 | 3 | 1 | 6 | 4 | 4.5 | 5  |
| 639 | 5 | 1 | 1 | 2 | 5 | 3   | 5  |
| 639 | 5 | 3 | 3 | 1 | 3 | 5.5 | 15 |
| 639 | 1 | 1 | 5 | 3 | 1 | 2   | 5  |
| 639 | 1 | 6 | 2 | 1 | 5 | 2   | 2  |
| 639 | 1 | 1 | 1 | 1 | 3 | 2.5 | 1  |
| 640 | 5 | 1 | 7 | 7 | 4 | 6.5 | 35 |
| 640 | 5 | 1 | 1 | 7 | 4 | 1   | 5  |
| 640 | 5 | 6 | 1 | 1 | 1 | 1   | 5  |
| 640 | 5 | 7 | 1 | 3 | 6 | 4.5 | 5  |
| 640 | 5 | 7 | 1 | 4 | 3 | 5.5 | 5  |
| 640 | 5 | 7 | 1 | 3 | 7 | 4   | 5  |
| 640 | 6 | 3 | 4 | 5 | 1 | 3   | 24 |
| 640 | 6 | 1 | 1 | 6 | 3 | 1   | 6  |
| 640 | 6 | 4 | 6 | 7 | 2 | 6.5 | 36 |
| 640 | 5 | 5 | 1 | 1 | 2 | 1   | 5  |
| 640 | 5 | 1 | 1 | 1 | 1 | 1   | 5  |
| 640 | 5 | 5 | 4 | 5 | 6 | 6   | 20 |
| 640 | 5 | 1 | 1 | 7 | 7 | 1   | 5  |
| 640 | 5 | 5 | 1 | 3 | 7 | 3   | 5  |
| 640 | 5 | 1 | 3 | 7 | 6 | 5.5 | 15 |
| 640 | 2 | 1 | 1 | 7 | 3 | 5   | 2  |

brand extension data

|     |   |   |   |   |   |     |    |
|-----|---|---|---|---|---|-----|----|
| 640 | 2 | 7 | 1 | 5 | 5 | 4   | 2  |
| 640 | 2 | 1 | 1 | 2 | 6 | 1   | 2  |
| 641 | 5 | 7 | 7 | 7 | 5 | 5.5 | 35 |
| 641 | 5 | 7 | 5 | 7 | 5 | 2.5 | 25 |
| 641 | 5 | 5 | 3 | 1 | 1 | 2.5 | 15 |
| 641 | 5 | 7 | 2 | 5 | 4 | 4.5 | 10 |
| 641 | 5 | 3 | 4 | 2 | 3 | 5.5 | 20 |
| 641 | 5 | 6 | 3 | 3 | 7 | 5   | 15 |
| 641 | 6 | 5 | 6 | 1 | 1 | 2.5 | 36 |
| 641 | 6 | 1 | 2 | 5 | 2 | 4   | 12 |
| 641 | 6 | 7 | 7 | 6 | 4 | 7   | 42 |
| 641 | 6 | 6 | 5 | 1 | 6 | 6.5 | 30 |
| 641 | 6 | 2 | 1 | 1 | 1 | 2.5 | 6  |
| 641 | 6 | 7 | 6 | 6 | 6 | 7   | 36 |
| 641 | 7 | 2 | 3 | 7 | 6 | 5.5 | 21 |
| 641 | 7 | 6 | 1 | 4 | 7 | 4   | 7  |
| 641 | 7 | 4 | 5 | 5 | 5 | 5.5 | 35 |
| 641 | 5 | 5 | 5 | 5 | 1 | 4   | 25 |
| 641 | 5 | 6 | 2 | 2 | 7 | 3   | 10 |
| 641 | 5 | 1 | 1 | 1 | 6 | 2.5 | 5  |
| 642 | 5 | 4 | 3 | 4 | 3 | 4.5 | 15 |
| 642 | 5 | 4 | 2 | 4 | 3 | 3.5 | 10 |
| 642 | 5 | 3 | 1 | 2 | 1 | 3   | 5  |
| 642 | 5 | 5 | 1 | 1 | 5 | 4   | 5  |
| 642 | 5 | 2 | 3 | 2 | 5 | 3.5 | 15 |
| 642 | 5 | 3 | 4 | 3 | 5 | 3.5 | 20 |
| 642 | 6 | 2 | 6 | 1 | 1 | 6   | 36 |
| 642 | 6 | 2 | 5 | 3 | 2 | 6.5 | 30 |
| 642 | 6 | 3 | 6 | 2 | 4 | 6   | 36 |
| 642 | 7 | 4 | 4 | 4 | 6 | 6   | 28 |
| 642 | 7 | 3 | 3 | 3 | 3 | 6.5 | 21 |
| 642 | 7 | 5 | 2 | 5 | 5 | 6   | 14 |
| 642 | 7 | 5 | 4 | 6 | 6 | 7   | 28 |
| 642 | 7 | 6 | 2 | 4 | 5 | 2.5 | 14 |
| 642 | 7 | 3 | 3 | 5 | 3 | 6.5 | 21 |
| 642 | 6 | 2 | 1 | 3 | 2 | 4.5 | 6  |
| 642 | 6 | 3 | 3 | 4 | 5 | 2.5 | 18 |
| 642 | 6 | 2 | 1 | 2 | 2 | 2   | 6  |
| 643 | 5 | 6 | 1 | 7 | 7 | 6   | 5  |
| 643 | 5 | 6 | 7 | 7 | 7 | 3.5 | 35 |
| 643 | 5 | 2 | 1 | 2 | 1 | 2   | 5  |
| 643 | 7 | 6 | 5 | 2 | 1 | 6   | 35 |
| 643 | 7 | 6 | 4 | 6 | 4 | 7   | 28 |
| 643 | 7 | 6 | 7 | 5 | 2 | 6.5 | 49 |
| 643 | 4 | 5 | 4 | 7 | 2 | 4.5 | 16 |
| 643 | 4 | 6 | 1 | 2 | 7 | 6.5 | 4  |
| 643 | 4 | 5 | 1 | 1 | 4 | 2.5 | 4  |
| 644 | 5 | 6 | 7 | 7 | 2 | 5   | 35 |
| 644 | 5 | 6 | 3 | 7 | 2 | 2.5 | 15 |
| 644 | 5 | 7 | 2 | 1 | 1 | 4   | 10 |
| 644 | 6 | 7 | 2 | 1 | 4 | 5.5 | 12 |

brand extension data

|     |   |   |   |   |   |     |    |
|-----|---|---|---|---|---|-----|----|
| 644 | 6 | 4 | 3 | 2 | 3 | 5.5 | 18 |
| 644 | 6 | 7 | 3 | 6 | 5 | 5.5 | 18 |
| 644 | 6 | 7 | 6 | 2 | 1 | 4.5 | 36 |
| 644 | 6 | 3 | 4 | 6 | 2 | 5.5 | 24 |
| 644 | 6 | 2 | 6 | 2 | 2 | 3.5 | 36 |
| 644 | 7 | 7 | 2 | 2 | 4 | 6   | 14 |
| 644 | 7 | 7 | 2 | 2 | 1 | 5   | 14 |
| 644 | 7 | 2 | 3 | 6 | 2 | 5.5 | 21 |
| 644 | 7 | 1 | 5 | 7 | 6 | 6   | 35 |
| 644 | 7 | 7 | 1 | 2 | 6 | 4.5 | 7  |
| 644 | 7 | 1 | 1 | 4 | 4 | 5.5 | 7  |
| 644 | 2 | 7 | 5 | 7 | 1 | 3   | 10 |
| 644 | 2 | 7 | 1 | 1 | 7 | 5.5 | 2  |
| 644 | 2 | 1 | 1 | 1 | 4 | 4.5 | 2  |
| 645 | 4 | 5 | 7 | 6 | 2 | 6.5 | 28 |
| 645 | 4 | 5 | 3 | 6 | 2 | 1   | 12 |
| 645 | 4 | 4 | 2 | 2 | 1 | 2   | 8  |
| 645 | 5 | 7 | 4 | 2 | 3 | 5   | 20 |
| 645 | 5 | 5 | 2 | 3 | 2 | 1.5 | 10 |
| 645 | 5 | 5 | 6 | 3 | 3 | 4   | 30 |
| 645 | 5 | 7 | 6 | 4 | 1 | 3   | 30 |
| 645 | 5 | 5 | 3 | 3 | 2 | 1   | 15 |
| 645 | 5 | 5 | 3 | 6 | 1 | 4   | 15 |
| 645 | 5 | 2 | 2 | 3 | 2 | 1.5 | 10 |
| 645 | 5 | 1 | 1 | 2 | 2 | 1   | 5  |
| 645 | 5 | 4 | 3 | 3 | 4 | 6   | 15 |
| 645 | 5 | 4 | 3 | 4 | 4 | 4.5 | 15 |
| 645 | 5 | 5 | 1 | 2 | 6 | 1   | 5  |
| 645 | 5 | 1 | 2 | 2 | 2 | 1.5 | 10 |
| 645 | 6 | 4 | 2 | 4 | 1 | 2   | 12 |
| 645 | 6 | 2 | 1 | 3 | 6 | 4   | 6  |
| 645 | 6 | 2 | 2 | 2 | 2 | 1   | 12 |
| 646 | 4 | 7 | 4 | 7 | 3 | 4   | 16 |
| 646 | 4 | 7 | 3 | 7 | 3 | 2.5 | 12 |
| 646 | 4 | 4 | 2 | 3 | 1 | 3   | 8  |
| 646 | 2 | 7 | 1 | 2 | 5 | 2.5 | 2  |
| 646 | 2 | 7 | 3 | 2 | 3 | 2   | 6  |
| 646 | 2 | 5 | 4 | 1 | 6 | 2.5 | 8  |
| 646 | 1 | 3 | 5 | 3 | 1 | 3   | 5  |
| 646 | 1 | 2 | 6 | 4 | 1 | 3   | 6  |
| 646 | 1 | 2 | 7 | 5 | 4 | 2.5 | 7  |
| 646 | 2 | 2 | 5 | 3 | 1 | 3.5 | 10 |
| 646 | 2 | 2 | 5 | 3 | 1 | 3   | 10 |
| 646 | 2 | 6 | 5 | 6 | 3 | 3.5 | 10 |
| 646 | 6 | 6 | 5 | 6 | 6 | 4.5 | 30 |
| 646 | 6 | 4 | 4 | 4 | 4 | 3   | 24 |
| 646 | 6 | 3 | 2 | 5 | 5 | 3.5 | 12 |
| 646 | 2 | 7 | 7 | 7 | 1 | 3   | 14 |
| 646 | 2 | 4 | 4 | 4 | 4 | 2.5 | 8  |
| 646 | 2 | 2 | 3 | 1 | 2 | 2.5 | 6  |
| 647 | 5 | 5 | 3 | 7 | 2 | 5   | 15 |

brand extension data

|     |   |   |   |   |   |     |    |
|-----|---|---|---|---|---|-----|----|
| 647 | 5 | 5 | 2 | 7 | 2 | 5.5 | 10 |
| 647 | 5 | 5 | 2 | 4 | 1 | 4   | 10 |
| 647 | 4 | 5 | 1 | 4 | 4 | 4.5 | 4  |
| 647 | 4 | 5 | 1 | 5 | 4 | 5   | 4  |
| 647 | 4 | 4 | 1 | 3 | 6 | 5   | 4  |
| 647 | 5 | 5 | 4 | 4 | 1 | 5   | 20 |
| 647 | 5 | 5 | 4 | 4 | 3 | 4.5 | 20 |
| 647 | 5 | 5 | 3 | 4 | 2 | 3   | 15 |
| 647 | 5 | 6 | 5 | 4 | 3 | 4.5 | 25 |
| 647 | 5 | 6 | 4 | 4 | 3 | 4   | 20 |
| 647 | 5 | 6 | 5 | 6 | 3 | 4   | 25 |
| 647 | 7 | 6 | 5 | 7 | 6 | 6   | 35 |
| 647 | 7 | 6 | 1 | 3 | 6 | 3   | 7  |
| 647 | 7 | 6 | 2 | 5 | 5 | 7   | 14 |
| 647 | 4 | 7 | 5 | 7 | 1 | 4   | 20 |
| 647 | 4 | 6 | 2 | 5 | 7 | 5   | 8  |
| 647 | 4 | 6 | 4 | 6 | 4 | 6   | 16 |
| 648 | 6 | 7 | 7 | 7 | 3 | 6   | 42 |
| 648 | 6 | 7 | 3 | 7 | 3 | 6   | 18 |
| 648 | 6 | 6 | 1 | 2 | 1 | 5   | 6  |
| 648 | 3 | 6 | 2 | 1 | 2 | 3.5 | 6  |
| 648 | 3 | 5 | 2 | 1 | 3 | 4.5 | 6  |
| 648 | 3 | 6 | 1 | 2 | 4 | 4   | 3  |
| 648 | 3 | 6 | 4 | 3 | 1 | 3   | 12 |
| 648 | 3 | 5 | 3 | 3 | 3 | 3   | 9  |
| 648 | 3 | 5 | 5 | 4 | 3 | 3.5 | 15 |
| 648 | 4 | 5 | 2 | 3 | 4 | 4   | 8  |
| 648 | 4 | 6 | 5 | 5 | 3 | 3   | 20 |
| 648 | 4 | 7 | 5 | 6 | 3 | 4   | 20 |
| 648 | 7 | 2 | 5 | 6 | 6 | 7   | 35 |
| 648 | 7 | 6 | 1 | 1 | 5 | 5.5 | 7  |
| 648 | 7 | 1 | 4 | 5 | 4 | 6   | 28 |
| 648 | 4 | 7 | 5 | 5 | 2 | 5   | 20 |
| 648 | 4 | 4 | 3 | 4 | 4 | 2.5 | 12 |
| 648 | 4 | 1 | 1 | 1 | 2 | 5.5 | 4  |
| 649 | 5 | 7 | 6 | 7 | 1 | 5   | 30 |
| 649 | 5 | 7 | 2 | 7 | 1 | 2   | 10 |
| 649 | 5 | 5 | 4 | 1 | 3 | 1.5 | 20 |
| 649 | 6 | 7 | 2 | 1 | 6 | 1   | 12 |
| 649 | 6 | 4 | 2 | 1 | 2 | 4.5 | 12 |
| 649 | 6 | 2 | 2 | 1 | 4 | 4   | 12 |
| 649 | 6 | 2 | 5 | 1 | 3 | 1.5 | 30 |
| 649 | 6 | 2 | 2 | 2 | 2 | 3   | 12 |
| 649 | 6 | 6 | 6 | 4 | 2 | 5.5 | 36 |
| 649 | 6 | 5 | 2 | 1 | 3 | 3   | 12 |
| 649 | 6 | 1 | 2 | 1 | 2 | 2   | 12 |
| 649 | 6 | 5 | 6 | 5 | 4 | 5.5 | 36 |
| 649 | 6 | 6 | 2 | 7 | 6 | 5   | 12 |
| 649 | 6 | 6 | 5 | 1 | 6 | 4   | 30 |
| 649 | 6 | 2 | 2 | 1 | 3 | 4   | 12 |
| 649 | 5 | 1 | 3 | 7 | 1 | 7   | 15 |

brand extension data

|     |   |   |   |   |   |     |    |
|-----|---|---|---|---|---|-----|----|
| 649 | 5 | 5 | 2 | 1 | 7 | 3.5 | 10 |
| 649 | 5 | 1 | 2 | 1 | 5 | 1   | 10 |
| 650 | 6 | 7 | 7 | 7 | 3 | 6   | 42 |
| 650 | 6 | 7 | 3 | 7 | 3 | 1.5 | 18 |
| 650 | 6 | 7 | 2 | 2 | 1 | 2   | 12 |
| 650 | 7 | 7 | 1 | 2 | 5 | 5.5 | 7  |
| 650 | 7 | 6 | 2 | 2 | 3 | 6   | 14 |
| 650 | 7 | 5 | 4 | 2 | 5 | 5   | 28 |
| 650 | 6 | 7 | 6 | 2 | 1 | 1.5 | 36 |
| 650 | 6 | 3 | 3 | 5 | 1 | 2.5 | 18 |
| 650 | 6 | 7 | 7 | 5 | 1 | 6.5 | 42 |
| 650 | 6 | 7 | 7 | 3 | 6 | 3   | 42 |
| 650 | 6 | 4 | 3 | 2 | 2 | 3   | 18 |
| 650 | 6 | 6 | 7 | 6 | 4 | 7   | 42 |
| 650 | 6 | 2 | 2 | 5 | 6 | 3.5 | 12 |
| 650 | 6 | 5 | 2 | 2 | 7 | 3   | 12 |
| 650 | 6 | 3 | 4 | 5 | 5 | 4.5 | 24 |
| 650 | 3 | 1 | 7 | 7 | 2 | 6.5 | 21 |
| 650 | 3 | 6 | 3 | 1 | 7 | 4.5 | 9  |
| 650 | 3 | 1 | 1 | 2 | 6 | 2   | 3  |
| 651 | 5 | 5 | 6 | 7 | 5 | 6   | 30 |
| 651 | 5 | 5 | 5 | 7 | 5 | 4   | 25 |
| 651 | 5 | 5 | 2 | 3 | 2 | 4   | 10 |
| 651 | 5 | 6 | 1 | 2 | 5 | 4   | 5  |
| 651 | 5 | 6 | 1 | 2 | 3 | 3.5 | 5  |
| 651 | 5 | 5 | 1 | 2 | 4 | 3.5 | 5  |
| 651 | 7 | 3 | 5 | 2 | 2 | 7   | 35 |
| 651 | 7 | 1 | 2 | 5 | 3 | 4   | 14 |
| 651 | 7 | 4 | 6 | 4 | 3 | 6.5 | 42 |
| 651 | 6 | 6 | 1 | 3 | 3 | 6   | 6  |
| 651 | 6 | 5 | 1 | 3 | 3 | 4   | 6  |
| 651 | 6 | 4 | 5 | 5 | 4 | 3   | 30 |
| 651 | 7 | 2 | 1 | 6 | 6 | 6.5 | 7  |
| 651 | 7 | 5 | 1 | 2 | 4 | 2   | 7  |
| 651 | 7 | 2 | 1 | 3 | 4 | 2.5 | 7  |
| 651 | 4 | 7 | 6 | 6 | 2 | 6.5 | 24 |
| 651 | 4 | 6 | 1 | 2 | 7 | 6   | 4  |
| 651 | 4 | 5 | 1 | 2 | 6 | 3.5 | 4  |
| 652 | 5 | 7 | 7 | 7 | 3 | 4.5 | 35 |
| 652 | 5 | 7 | 6 | 7 | 3 | 4.5 | 30 |
| 652 | 5 | 7 | 2 | 2 | 2 | 5   | 10 |
| 652 | 7 | 7 | 1 | 3 | 5 | 4   | 7  |
| 652 | 7 | 7 | 3 | 2 | 3 | 4   | 21 |
| 652 | 7 | 7 | 3 | 3 | 4 | 4.5 | 21 |
| 652 | 6 | 5 | 6 | 2 | 2 | 5.5 | 36 |
| 652 | 6 | 2 | 2 | 3 | 2 | 5   | 12 |
| 652 | 6 | 6 | 6 | 3 | 3 | 6   | 36 |
| 652 | 4 | 6 | 2 | 2 | 3 | 4   | 8  |
| 652 | 4 | 1 | 1 | 2 | 1 | 4   | 4  |
| 652 | 4 | 4 | 3 | 5 | 3 | 4   | 12 |
| 652 | 6 | 2 | 2 | 5 | 5 | 5   | 12 |

brand extension data

|     |   |   |   |   |   |     |    |
|-----|---|---|---|---|---|-----|----|
| 652 | 6 | 3 | 2 | 3 | 5 | 3   | 12 |
| 652 | 6 | 3 | 3 | 5 | 4 | 5   | 18 |
| 652 | 3 | 1 | 3 | 5 | 3 | 2   | 9  |
| 652 | 3 | 6 | 1 | 1 | 6 | 2.5 | 3  |
| 652 | 3 | 3 | 2 | 2 | 4 | 2   | 6  |
| 653 | 5 | 7 | 7 | 7 | 6 | 6   | 35 |
| 653 | 5 | 7 | 3 | 7 | 6 | 3.5 | 15 |
| 653 | 5 | 2 | 1 | 1 | 2 | 3   | 5  |
| 653 | 4 | 5 | 1 | 1 | 6 | 2.5 | 4  |
| 653 | 4 | 5 | 1 | 2 | 5 | 2.5 | 4  |
| 653 | 4 | 6 | 1 | 3 | 7 | 2.5 | 4  |
| 653 | 6 | 5 | 3 | 4 | 2 | 3.5 | 18 |
| 653 | 6 | 2 | 1 | 7 | 4 | 4.5 | 6  |
| 653 | 6 | 4 | 5 | 6 | 5 | 6   | 30 |
| 653 | 6 | 6 | 5 | 3 | 3 | 4.5 | 30 |
| 653 | 6 | 1 | 1 | 1 | 1 | 3.5 | 6  |
| 653 | 6 | 7 | 6 | 6 | 6 | 3.5 | 36 |
| 653 | 6 | 6 | 1 | 7 | 7 | 6   | 6  |
| 653 | 6 | 1 | 1 | 3 | 7 | 2.5 | 6  |
| 653 | 6 | 2 | 1 | 2 | 6 | 4   | 6  |
| 653 | 4 | 1 | 2 | 6 | 5 | 4.5 | 8  |
| 653 | 4 | 7 | 4 | 7 | 4 | 4.5 | 16 |
| 653 | 4 | 1 | 1 | 2 | 3 | 4.5 | 4  |
| 654 | 4 | 6 | 5 | 6 | 3 | 5   | 20 |
| 654 | 4 | 6 | 4 | 6 | 3 | 4   | 16 |
| 654 | 4 | 3 | 1 | 2 | 2 | 3.5 | 4  |
| 654 | 4 | 5 | 2 | 3 | 4 | 4   | 8  |
| 654 | 4 | 4 | 3 | 4 | 4 | 4   | 12 |
| 654 | 4 | 4 | 1 | 2 | 5 | 4   | 4  |
| 654 | 6 | 1 | 2 | 2 | 2 | 3.5 | 12 |
| 654 | 6 | 2 | 3 | 4 | 2 | 3.5 | 18 |
| 654 | 6 | 4 | 4 | 5 | 3 | 5.5 | 24 |
| 654 | 6 | 5 | 4 | 3 | 3 | 6   | 24 |
| 654 | 6 | 3 | 2 | 2 | 3 | 6   | 12 |
| 654 | 6 | 5 | 5 | 5 | 5 | 5.5 | 30 |
| 654 | 6 | 3 | 3 | 5 | 5 | 5.5 | 18 |
| 654 | 6 | 3 | 2 | 3 | 5 | 5.5 | 12 |
| 654 | 6 | 2 | 4 | 3 | 4 | 5   | 24 |
| 654 | 3 | 4 | 4 | 5 | 2 | 5   | 12 |
| 654 | 3 | 4 | 3 | 5 | 5 | 5.5 | 9  |
| 654 | 3 | 4 | 1 | 5 | 3 | 3   | 3  |
| 655 | 5 | 7 | 6 | 7 | 3 | 5   | 30 |
| 655 | 5 | 7 | 4 | 7 | 3 | 2   | 20 |
| 655 | 5 | 1 | 1 | 1 | 1 | 2   | 5  |
| 655 | 4 | 5 | 1 | 1 | 4 | 1   | 4  |
| 655 | 4 | 5 | 1 | 1 | 1 | 1   | 4  |
| 655 | 4 | 5 | 2 | 1 | 5 | 1   | 8  |
| 655 | 5 | 4 | 1 | 1 | 1 | 3   | 5  |
| 655 | 5 | 1 | 1 | 1 | 1 | 4.5 | 5  |
| 655 | 5 | 5 | 4 | 4 | 1 | 5   | 20 |
| 655 | 5 | 6 | 3 | 4 | 4 | 7   | 15 |

brand extension data

|     |   |   |   |   |   |     |    |
|-----|---|---|---|---|---|-----|----|
| 655 | 5 | 1 | 1 | 1 | 1 | 3.5 | 5  |
| 655 | 5 | 6 | 4 | 4 | 5 | 5   | 20 |
| 655 | 5 | 5 | 5 | 7 | 6 | 7   | 25 |
| 655 | 5 | 1 | 1 | 1 | 5 | 2   | 5  |
| 655 | 5 | 4 | 2 | 2 | 5 | 4   | 10 |
| 655 | 1 | 3 | 3 | 5 | 1 | 1.5 | 3  |
| 655 | 1 | 3 | 1 | 1 | 1 | 2   | 1  |
| 655 | 1 | 1 | 1 | 1 | 5 | 1   | 1  |
| 656 | 5 | 2 | 7 | 7 | 5 | 5.5 | 35 |
| 656 | 5 | 2 | 6 | 7 | 5 | 1.5 | 30 |
| 656 | 5 | 3 | 2 | 1 | 2 | 3   | 10 |
| 656 | 7 | 7 | 1 | 2 | 3 | 6   | 7  |
| 656 | 7 | 5 | 1 | 1 | 1 | 4.5 | 7  |
| 656 | 7 | 7 | 2 | 3 | 3 | 6.5 | 14 |
| 656 | 7 | 4 | 5 | 3 | 2 | 6   | 35 |
| 656 | 7 | 1 | 2 | 1 | 2 | 2   | 14 |
| 656 | 7 | 5 | 6 | 5 | 2 | 7   | 42 |
| 656 | 6 | 5 | 1 | 3 | 1 | 5.5 | 6  |
| 656 | 6 | 5 | 1 | 1 | 3 | 1.5 | 6  |
| 656 | 6 | 2 | 2 | 6 | 7 | 6.5 | 12 |
| 656 | 6 | 2 | 2 | 6 | 6 | 6   | 12 |
| 656 | 6 | 7 | 2 | 3 | 6 | 6.5 | 12 |
| 656 | 6 | 2 | 3 | 4 | 3 | 5   | 18 |
| 656 | 3 | 6 | 5 | 4 | 4 | 5   | 15 |
| 656 | 3 | 6 | 2 | 4 | 5 | 4.5 | 6  |
| 656 | 3 | 1 | 2 | 5 | 4 | 3   | 6  |
| 657 | 4 | 2 | 6 | 7 | 2 | 2.5 | 24 |
| 657 | 4 | 2 | 1 | 7 | 2 | 1.5 | 4  |
| 657 | 4 | 5 | 1 | 1 | 1 | 1   | 4  |
| 657 | 6 | 6 | 1 | 2 | 4 | 3   | 6  |
| 657 | 6 | 7 | 5 | 2 | 3 | 5   | 30 |
| 657 | 6 | 7 | 6 | 2 | 6 | 5.5 | 36 |
| 657 | 7 | 7 | 7 | 5 | 1 | 7   | 49 |
| 657 | 7 | 1 | 4 | 3 | 3 | 2   | 28 |
| 657 | 7 | 3 | 6 | 4 | 3 | 7   | 42 |
| 657 | 6 | 5 | 2 | 1 | 3 | 3.5 | 12 |
| 657 | 6 | 1 | 1 | 1 | 2 | 1.5 | 6  |
| 657 | 6 | 2 | 2 | 4 | 4 | 5   | 12 |
| 657 | 7 | 5 | 4 | 7 | 7 | 7   | 28 |
| 657 | 7 | 7 | 4 | 2 | 5 | 5.5 | 28 |
| 657 | 7 | 7 | 2 | 4 | 4 | 6.5 | 14 |
| 657 | 5 | 2 | 1 | 6 | 1 | 3.5 | 5  |
| 657 | 5 | 7 | 1 | 3 | 6 | 1   | 5  |
| 657 | 5 | 5 | 1 | 1 | 2 | 1   | 5  |
| 658 | 5 | 6 | 6 | 7 | 3 | 5.5 | 30 |
| 658 | 5 | 6 | 3 | 7 | 3 | 2.5 | 15 |
| 658 | 5 | 5 | 1 | 4 | 1 | 1.5 | 5  |
| 658 | 5 | 5 | 1 | 4 | 5 | 4.5 | 5  |
| 658 | 5 | 4 | 1 | 4 | 4 | 4   | 5  |
| 658 | 5 | 5 | 3 | 3 | 7 | 3.5 | 15 |
| 658 | 6 | 6 | 5 | 5 | 1 | 4.5 | 30 |

brand extension data

|     |   |   |   |   |   |     |    |
|-----|---|---|---|---|---|-----|----|
| 658 | 6 | 3 | 2 | 6 | 2 | 2   | 12 |
| 658 | 6 | 6 | 5 | 6 | 4 | 4   | 30 |
| 658 | 6 | 7 | 5 | 4 | 6 | 6.5 | 30 |
| 658 | 6 | 4 | 3 | 3 | 3 | 3   | 18 |
| 658 | 6 | 7 | 6 | 6 | 5 | 6   | 36 |
| 658 | 7 | 5 | 4 | 7 | 6 | 6.5 | 28 |
| 658 | 7 | 5 | 2 | 4 | 6 | 2   | 14 |
| 658 | 7 | 4 | 4 | 6 | 5 | 4   | 28 |
| 658 | 4 | 3 | 6 | 3 | 2 | 4   | 24 |
| 658 | 4 | 7 | 4 | 5 | 5 | 2.5 | 16 |
| 658 | 4 | 2 | 1 | 4 | 5 | 1.5 | 4  |
| 659 | 3 | 7 | 7 | 7 | 4 | 3.5 | 21 |
| 659 | 3 | 7 | 1 | 7 | 4 | 1   | 3  |
| 659 | 3 | 7 | 2 | 7 | 1 | 4.5 | 6  |
| 659 | 5 | 7 | 1 | 1 | 5 | 1.5 | 5  |
| 659 | 5 | 7 | 1 | 1 | 5 | 5   | 5  |
| 659 | 5 | 7 | 1 | 1 | 7 | 4   | 5  |
| 659 | 7 | 1 | 5 | 4 | 1 | 5.5 | 35 |
| 659 | 7 | 1 | 1 | 1 | 3 | 1   | 7  |
| 659 | 7 | 7 | 7 | 7 | 3 | 7   | 49 |
| 659 | 7 | 7 | 2 | 3 | 5 | 7   | 14 |
| 659 | 7 | 2 | 2 | 3 | 4 | 2   | 14 |
| 659 | 7 | 7 | 5 | 7 | 7 | 7   | 35 |
| 659 | 7 | 5 | 2 | 1 | 7 | 6   | 14 |
| 659 | 7 | 7 | 2 | 3 | 7 | 7   | 14 |
| 659 | 7 | 1 | 4 | 2 | 7 | 7   | 28 |
| 659 | 3 | 1 | 7 | 7 | 2 | 2   | 21 |
| 659 | 3 | 7 | 1 | 1 | 7 | 4   | 3  |
| 659 | 3 | 2 | 1 | 1 | 5 | 5   | 3  |
| 660 | 6 | 3 | 7 | 7 | 1 | 4   | 42 |
| 660 | 6 | 3 | 7 | 7 | 1 | 3   | 42 |
| 660 | 6 | 7 | 1 | 1 | 1 | 4.5 | 6  |
| 660 | 7 | 7 | 1 | 3 | 6 | 4.5 | 7  |
| 660 | 7 | 5 | 1 | 4 | 5 | 4.5 | 7  |
| 660 | 7 | 5 | 1 | 3 | 7 | 5   | 7  |
| 660 | 7 | 2 | 1 | 2 | 1 | 5   | 7  |
| 660 | 7 | 2 | 1 | 2 | 2 | 3   | 7  |
| 660 | 7 | 2 | 4 | 5 | 2 | 7   | 28 |
| 660 | 7 | 7 | 1 | 1 | 4 | 6   | 7  |
| 660 | 7 | 2 | 1 | 1 | 3 | 4.5 | 7  |
| 660 | 7 | 2 | 4 | 6 | 6 | 7   | 28 |
| 660 | 7 | 2 | 1 | 5 | 6 | 6   | 7  |
| 660 | 7 | 2 | 1 | 5 | 6 | 6   | 7  |
| 660 | 7 | 2 | 3 | 4 | 4 | 5   | 21 |
| 660 | 6 | 2 | 5 | 7 | 2 | 4.5 | 30 |
| 660 | 6 | 7 | 1 | 1 | 7 | 5   | 6  |
| 660 | 6 | 2 | 1 | 1 | 5 | 2.5 | 6  |
| 661 | 5 | 7 | 7 | 7 | 2 | 5.5 | 35 |
| 661 | 5 | 7 | 5 | 7 | 2 | 2.5 | 25 |
| 661 | 5 | 7 | 3 | 3 | 2 | 2   | 15 |
| 661 | 3 | 7 | 1 | 2 | 6 | 1.5 | 3  |

brand extension data

|     |   |   |   |   |   |     |    |
|-----|---|---|---|---|---|-----|----|
| 661 | 3 | 7 | 1 | 4 | 2 | 2.5 | 3  |
| 661 | 3 | 7 | 1 | 6 | 5 | 3   | 3  |
| 661 | 7 | 7 | 6 | 4 | 2 | 7   | 42 |
| 661 | 7 | 1 | 1 | 2 | 2 | 2   | 7  |
| 661 | 7 | 7 | 5 | 4 | 2 | 7   | 35 |
| 661 | 7 | 7 | 1 | 5 | 2 | 6.5 | 7  |
| 661 | 7 | 3 | 1 | 2 | 2 | 5.5 | 7  |
| 661 | 7 | 7 | 1 | 6 | 4 | 6.5 | 7  |
| 661 | 7 | 1 | 1 | 5 | 5 | 5   | 7  |
| 661 | 7 | 7 | 1 | 4 | 5 | 3.5 | 7  |
| 661 | 7 | 3 | 5 | 2 | 4 | 2.5 | 35 |
| 661 | 5 | 7 | 6 | 7 | 2 | 5.5 | 30 |
| 661 | 5 | 7 | 1 | 2 | 6 | 5.5 | 5  |
| 661 | 5 | 4 | 1 | 5 | 2 | 5.5 | 5  |
| 662 | 4 | 7 | 6 | 7 | 3 | 5   | 24 |
| 662 | 4 | 7 | 1 | 7 | 3 | 2.5 | 4  |
| 662 | 4 | 4 | 1 | 1 | 1 | 5.5 | 4  |
| 662 | 3 | 6 | 4 | 5 | 5 | 3.5 | 12 |
| 662 | 3 | 6 | 1 | 1 | 3 | 3   | 3  |
| 662 | 3 | 6 | 6 | 2 | 4 | 3.5 | 18 |
| 662 | 6 | 4 | 6 | 2 | 1 | 4.5 | 36 |
| 662 | 6 | 6 | 6 | 5 | 3 | 5.5 | 36 |
| 662 | 6 | 7 | 7 | 6 | 1 | 6   | 42 |
| 662 | 7 | 6 | 6 | 3 | 3 | 6   | 42 |
| 662 | 7 | 1 | 1 | 1 | 1 | 5   | 7  |
| 662 | 7 | 7 | 7 | 5 | 5 | 6.5 | 49 |
| 662 | 7 | 3 | 5 | 5 | 5 | 5   | 35 |
| 662 | 7 | 7 | 3 | 3 | 5 | 5   | 21 |
| 662 | 7 | 3 | 5 | 4 | 4 | 6   | 35 |
| 662 | 4 | 1 | 4 | 6 | 1 | 3.5 | 16 |
| 662 | 4 | 7 | 5 | 1 | 5 | 3.5 | 20 |
| 662 | 4 | 1 | 1 | 1 | 2 | 3   | 4  |
| 663 | 1 | 1 | 7 | 7 | 5 | 1   | 7  |
| 663 | 1 | 1 | 1 | 7 | 5 | 1   | 1  |
| 663 | 1 | 1 | 1 | 4 | 4 | 1.5 | 1  |
| 663 | 7 | 7 | 1 | 3 | 4 | 6   | 7  |
| 663 | 7 | 4 | 1 | 2 | 3 | 2   | 7  |
| 663 | 7 | 2 | 1 | 2 | 6 | 1.5 | 7  |
| 663 | 7 | 1 | 1 | 1 | 4 | 1.5 | 7  |
| 663 | 7 | 1 | 1 | 1 | 1 | 1   | 7  |
| 663 | 7 | 5 | 7 | 6 | 2 | 7   | 49 |
| 663 | 7 | 7 | 2 | 2 | 2 | 4   | 14 |
| 663 | 7 | 3 | 1 | 2 | 1 | 1.5 | 7  |
| 663 | 7 | 6 | 6 | 7 | 5 | 6   | 42 |
| 663 | 4 | 5 | 6 | 6 | 7 | 5.5 | 24 |
| 663 | 4 | 6 | 1 | 4 | 6 | 4   | 4  |
| 663 | 4 | 2 | 7 | 4 | 6 | 5   | 28 |
| 663 | 4 | 7 | 6 | 7 | 4 | 7   | 24 |
| 663 | 4 | 7 | 1 | 3 | 7 | 5   | 4  |
| 663 | 4 | 1 | 1 | 1 | 5 | 1   | 4  |
| 664 | 4 | 7 | 7 | 7 | 3 | 6   | 28 |

brand extension data

|     |   |   |   |   |   |     |    |
|-----|---|---|---|---|---|-----|----|
| 664 | 4 | 7 | 5 | 7 | 3 | 1   | 20 |
| 664 | 4 | 3 | 2 | 4 | 1 | 1.5 | 8  |
| 664 | 3 | 3 | 1 | 2 | 3 | 4   | 3  |
| 664 | 3 | 2 | 1 | 5 | 2 | 3   | 3  |
| 664 | 3 | 4 | 5 | 3 | 3 | 3.5 | 15 |
| 664 | 2 | 6 | 4 | 2 | 1 | 3.5 | 8  |
| 664 | 2 | 2 | 1 | 1 | 1 | 4   | 2  |
| 664 | 2 | 6 | 6 | 7 | 1 | 5.5 | 12 |
| 664 | 6 | 6 | 5 | 3 | 2 | 5.5 | 30 |
| 664 | 6 | 5 | 2 | 2 | 4 | 4.5 | 12 |
| 664 | 6 | 5 | 4 | 1 | 3 | 4   | 24 |
| 664 | 7 | 2 | 2 | 6 | 6 | 6   | 14 |
| 664 | 7 | 1 | 1 | 1 | 5 | 3   | 7  |
| 664 | 7 | 1 | 1 | 2 | 2 | 1.5 | 7  |
| 664 | 4 | 7 | 6 | 7 | 1 | 1   | 24 |
| 664 | 4 | 4 | 3 | 6 | 6 | 7   | 12 |
| 664 | 4 | 1 | 1 | 2 | 4 | 1   | 4  |
| 665 | 5 | 4 | 6 | 5 | 4 | 6   | 30 |
| 665 | 5 | 4 | 1 | 5 | 4 | 4   | 5  |
| 665 | 5 | 7 | 1 | 6 | 3 | 5   | 5  |
| 665 | 3 | 7 | 6 | 6 | 4 | 4   | 18 |
| 665 | 3 | 5 | 1 | 5 | 3 | 1   | 3  |
| 665 | 3 | 5 | 1 | 5 | 5 |     | 3  |
| 665 | 6 | 6 | 3 | 6 | 3 | 6.5 | 18 |
| 665 | 6 | 1 | 1 | 2 | 4 | 5.5 | 6  |
| 665 | 6 | 1 | 3 | 4 | 1 | 5   | 18 |
| 665 | 7 | 4 | 3 | 7 | 6 | 6   | 21 |
| 665 | 7 | 7 | 1 | 7 | 5 | 4.5 | 7  |
| 665 | 7 | 4 | 1 | 7 | 6 | 4   | 7  |
| 665 | 2 | 3 | 6 | 2 | 3 | 1   | 12 |
| 665 | 2 | 1 | 1 | 5 | 2 | 3   | 2  |
| 666 | 4 | 6 | 3 | 7 | 1 | 3   | 12 |
| 666 | 4 | 6 | 3 | 7 | 1 | 1   | 12 |
| 666 | 4 | 6 | 1 | 2 | 3 | 1   | 4  |
| 666 | 5 | 7 | 2 | 3 | 4 | 1.5 | 10 |
| 666 | 5 | 3 | 2 | 2 | 1 | 1   | 10 |
| 666 | 5 | 1 | 1 | 2 | 4 | 1.5 | 5  |
| 666 | 5 | 2 | 2 | 3 | 3 | 1   | 10 |
| 666 | 5 | 1 | 1 | 5 | 1 | 1   | 5  |
| 666 | 5 | 1 | 5 | 5 | 4 | 3.5 | 25 |
| 666 | 5 | 4 | 3 | 3 | 3 | 3   | 15 |
| 666 | 5 | 2 | 2 | 2 | 1 | 1   | 10 |
| 666 | 5 | 1 | 4 | 4 | 4 | 1.5 | 20 |
| 666 | 6 | 1 | 1 | 4 | 6 | 4   | 6  |
| 666 | 6 | 7 | 3 | 4 | 6 | 1   | 18 |
| 666 | 6 | 4 | 3 | 5 | 5 | 6   | 18 |
| 666 | 2 | 2 | 5 | 6 | 3 | 1.5 | 10 |
| 666 | 2 | 4 | 4 | 5 | 7 | 4   | 8  |
| 666 | 2 | 1 | 1 | 2 | 3 | 1   | 2  |
| 667 | 6 | 6 | 7 | 7 | 5 | 6   | 42 |
| 667 | 6 | 6 | 3 | 7 | 5 | 3   | 18 |

brand extension data

|     |   |   |   |   |   |     |    |
|-----|---|---|---|---|---|-----|----|
| 667 | 6 | 3 | 1 | 3 | 3 | 2   | 6  |
| 667 | 4 | 5 | 3 | 3 | 5 | 2   | 12 |
| 667 | 4 | 5 | 3 | 3 | 3 | 2.5 | 12 |
| 667 | 4 | 4 | 2 | 2 | 6 | 2.5 | 8  |
| 667 | 6 | 4 | 4 | 3 | 3 | 2   | 24 |
| 667 | 6 | 3 | 5 | 5 | 3 | 2.5 | 30 |
| 667 | 6 | 5 | 4 | 4 | 3 | 2   | 24 |
| 667 | 5 | 5 | 5 | 4 | 5 | 3.5 | 25 |
| 667 | 5 | 3 | 3 | 3 | 3 | 1.5 | 15 |
| 667 | 5 | 6 | 6 | 6 | 3 | 4   | 30 |
| 667 | 5 | 3 | 6 | 4 | 5 | 4.5 | 30 |
| 667 | 5 | 2 | 2 | 2 | 2 | 1   | 10 |
| 667 | 5 | 4 | 4 | 2 | 5 | 4.5 | 20 |
| 667 | 4 | 3 | 5 | 4 | 3 | 3   | 20 |
| 667 | 4 | 5 | 5 | 5 | 4 | 5   | 20 |
| 667 | 4 | 3 | 3 | 3 | 3 | 5   | 12 |
| 668 | 6 | 7 | 7 | 7 | 5 | 6   | 42 |
| 668 | 6 | 7 | 5 | 7 | 5 | 4.5 | 30 |
| 668 | 6 | 6 | 1 | 1 | 2 | 2.5 | 6  |
| 668 | 5 | 6 | 1 | 1 | 4 | 4.5 | 5  |
| 668 | 5 | 6 | 2 | 1 | 3 | 6   | 10 |
| 668 | 5 | 5 | 3 | 1 | 6 | 3.5 | 15 |
| 668 | 7 | 7 | 6 | 1 | 2 | 3   | 42 |
| 668 | 7 | 2 | 2 | 1 | 2 | 2   | 14 |
| 668 | 7 | 6 | 7 | 2 | 4 | 6.5 | 49 |
| 668 | 7 | 5 | 4 | 1 | 3 | 5.5 | 28 |
| 668 | 7 | 3 | 1 | 1 | 2 | 4   | 7  |
| 668 | 7 | 3 | 4 | 1 | 3 | 6   | 28 |
| 668 | 7 | 1 | 1 | 4 | 6 | 6.5 | 7  |
| 668 | 7 | 2 | 1 | 1 | 5 | 4   | 7  |
| 668 | 7 | 4 | 2 | 2 | 4 | 5.5 | 14 |
| 668 | 4 | 5 | 4 | 6 | 1 | 5.5 | 16 |
| 668 | 4 | 6 | 2 | 1 | 5 | 5.5 | 8  |
| 668 | 4 | 2 | 1 | 1 | 2 | 3   | 4  |
| 669 | 6 | 7 | 3 | 7 | 1 | 3.5 | 18 |
| 669 | 6 | 7 | 6 | 7 | 1 | 2.5 | 36 |
| 669 | 6 | 7 | 4 | 3 | 1 | 1.5 | 24 |
| 669 | 5 | 7 | 5 | 3 | 4 | 2   | 25 |
| 669 | 5 | 7 | 6 | 3 | 4 | 3   | 30 |
| 669 | 5 | 7 | 4 | 3 | 3 | 4.5 | 20 |
| 669 | 6 | 3 | 3 | 4 | 1 | 1.5 | 18 |
| 669 | 6 | 1 | 6 | 3 | 2 | 3.5 | 36 |
| 669 | 6 | 6 | 2 | 4 | 3 | 4.5 | 12 |
| 669 | 4 | 2 | 6 | 1 | 3 | 5.5 | 24 |
| 669 | 4 | 1 | 7 | 1 | 3 | 3.5 | 28 |
| 669 | 4 | 5 | 4 | 5 | 4 | 3.5 | 16 |
| 669 | 6 | 6 | 2 | 6 | 5 | 5.5 | 12 |
| 669 | 6 | 6 | 3 | 4 | 4 | 4.5 | 18 |
| 669 | 6 | 4 | 3 | 4 | 3 | 5.5 | 18 |
| 669 | 4 | 7 | 2 | 4 | 1 | 6.5 | 8  |
| 669 | 4 | 1 | 1 | 1 | 7 | 4.5 | 4  |

brand extension data

|     |   |   |   |   |   |     |    |
|-----|---|---|---|---|---|-----|----|
| 669 | 4 | 1 | 1 | 1 | 4 | 2.5 | 4  |
| 670 | 4 | 4 | 5 | 4 | 3 | 6   | 20 |
| 670 | 4 | 4 | 3 | 4 | 3 | 4   | 12 |
| 670 | 4 | 3 | 5 | 2 | 5 | 4.5 | 20 |
| 670 | 3 | 5 | 6 | 5 | 3 | 4.5 | 18 |
| 670 | 4 | 5 | 4 | 5 | 5 | 3.5 | 16 |
| 670 | 4 | 4 | 6 | 4 | 4 | 3   | 24 |
| 670 | 4 | 3 | 3 | 5 | 3 | 3.5 | 12 |
| 670 | 3 | 4 | 6 | 3 | 4 | 5   | 18 |
| 670 | 3 | 4 | 4 | 4 | 5 | 5.5 | 12 |
| 670 | 3 | 4 | 6 | 5 | 5 | 5   | 18 |
| 670 | 5 | 4 | 4 | 4 | 4 | 5.5 | 20 |
| 670 | 5 | 3 | 5 | 3 | 4 | 5.5 | 25 |
| 670 | 5 | 3 | 4 | 4 | 4 | 4   | 20 |
| 670 | 4 | 5 | 5 | 4 | 3 | 3   | 20 |
| 670 | 4 | 4 | 3 | 4 | 3 | 4   | 12 |
| 670 | 4 | 3 | 5 | 4 | 4 | 3   | 20 |
| 671 | 5 | 1 | 6 | 7 | 5 | 3   | 30 |
| 671 | 5 | 1 | 1 | 7 | 5 | 1.5 | 5  |
| 671 | 5 | 4 | 4 | 2 | 1 | 3   | 20 |
| 671 | 7 | 1 | 4 | 1 | 1 | 2.5 | 28 |
| 671 | 7 | 1 | 1 | 1 | 2 | 5.5 | 7  |
| 671 | 7 | 4 | 6 | 4 | 6 | 4.5 | 42 |
| 671 | 6 | 6 | 5 | 1 | 5 | 6   | 30 |
| 671 | 6 | 1 | 1 | 1 | 4 | 1   | 6  |
| 671 | 6 | 1 | 4 | 5 | 6 | 6   | 24 |
| 671 | 6 | 4 | 7 | 6 | 7 | 5.5 | 42 |
| 671 | 6 | 7 | 7 | 3 | 7 | 5.5 | 42 |
| 671 | 6 | 1 | 3 | 2 | 5 | 7   | 18 |
| 671 | 4 | 7 | 7 | 7 | 1 | 6.5 | 28 |
| 671 | 4 | 6 | 2 | 1 | 7 | 4   | 8  |
| 671 | 4 | 1 | 1 | 1 | 6 | 3.5 | 4  |
| 673 | 6 | 2 | 5 | 6 | 5 | 3.5 | 30 |
| 673 | 6 | 2 | 5 | 6 | 5 | 1.5 | 30 |
| 673 | 6 | 5 | 3 | 2 | 1 | 2.5 | 18 |
| 673 | 5 | 6 | 2 | 2 | 4 | 3   | 10 |
| 673 | 5 | 5 | 2 | 2 | 3 | 3   | 10 |
| 673 | 5 | 5 | 2 | 2 | 5 | 3   | 10 |
| 673 | 6 | 4 | 3 | 2 | 1 | 2   | 18 |
| 673 | 6 | 3 | 3 | 3 | 2 | 2   | 18 |
| 673 | 6 | 4 | 6 | 6 | 2 | 4.5 | 36 |
| 673 | 6 | 4 | 3 | 4 | 3 | 4.5 | 18 |
| 673 | 6 | 3 | 2 | 2 | 4 | 3.5 | 12 |
| 673 | 6 | 4 | 5 | 4 | 5 | 3.5 | 30 |
| 673 | 5 | 3 | 3 | 6 | 4 | 4.5 | 15 |
| 673 | 5 | 4 | 3 | 3 | 5 | 1.5 | 15 |
| 673 | 5 | 3 | 3 | 3 | 5 | 3.5 | 15 |
| 673 | 4 | 3 | 3 | 5 | 2 | 5   | 12 |
| 673 | 4 | 4 | 3 | 3 | 3 | 2   | 12 |
| 673 | 4 | 1 | 1 | 2 | 4 | 2.5 | 4  |
| 674 | 2 | 6 | 6 | 7 | 2 | 3   | 12 |

brand extension data

|     |   |   |   |   |   |     |    |
|-----|---|---|---|---|---|-----|----|
| 674 | 2 | 6 | 3 | 7 | 2 | 1   | 6  |
| 674 | 2 | 4 | 1 | 1 | 1 | 3   | 2  |
| 674 | 1 | 7 | 2 | 1 | 3 | 1   | 2  |
| 674 | 1 | 7 | 6 | 2 | 1 | 1   | 6  |
| 674 | 1 | 6 | 7 | 3 | 2 | 2.5 | 7  |
| 674 | 6 | 2 | 4 | 1 | 1 | 3.5 | 24 |
| 674 | 6 | 1 | 1 | 1 | 1 | 2.5 | 6  |
| 674 | 6 | 4 | 7 | 2 | 2 | 6   | 42 |
| 674 | 5 | 7 | 7 | 1 | 2 | 6.5 | 35 |
| 674 | 5 | 5 | 5 | 1 | 2 | 5.5 | 25 |
| 674 | 5 | 7 | 7 | 3 | 4 | 7   | 35 |
| 674 | 7 | 7 | 7 | 6 | 4 | 7   | 49 |
| 674 | 7 | 6 | 7 | 4 | 4 | 5.5 | 49 |
| 674 | 7 | 2 | 5 | 3 | 2 | 3.5 | 35 |
| 674 | 5 | 4 | 6 | 3 | 1 | 4.5 | 30 |
| 674 | 5 | 7 | 7 | 5 | 5 | 6.5 | 35 |
| 674 | 5 | 7 | 7 | 7 | 3 | 6   | 35 |
| 675 | 5 | 7 | 7 | 7 | 4 | 3.5 | 35 |
| 675 | 5 | 7 | 7 | 7 | 4 | 1.5 | 35 |
| 675 | 5 | 6 | 4 | 1 | 1 | 1.5 | 20 |
| 675 | 5 | 1 | 5 | 3 | 6 | 6.5 | 25 |
| 675 | 5 | 1 | 1 | 2 | 3 | 2   | 5  |
| 675 | 5 | 1 | 2 | 2 | 3 | 3.5 | 10 |
| 675 | 7 | 1 | 4 | 1 | 1 | 6   | 28 |
| 675 | 7 | 1 | 1 | 1 | 2 | 1   | 7  |
| 675 | 7 | 5 | 4 | 2 | 5 | 7   | 28 |
| 675 | 6 | 1 | 4 | 1 | 3 | 6.5 | 24 |
| 675 | 6 | 1 | 4 | 1 | 4 | 6.5 | 24 |
| 675 | 6 | 5 | 4 | 1 | 5 | 5.5 | 24 |
| 675 | 7 | 1 | 1 | 3 | 7 | 6.5 | 7  |
| 675 | 7 | 1 | 1 | 3 | 7 | 6   | 7  |
| 675 | 7 | 7 | 4 | 1 | 5 | 7   | 28 |
| 675 | 6 | 7 | 7 | 5 | 2 | 2   | 42 |
| 675 | 6 | 1 | 1 | 1 | 7 | 2.5 | 6  |
| 675 | 6 | 1 | 1 | 1 | 5 | 1.5 | 6  |
| 676 | 5 | 6 | 2 | 6 | 3 | 5   | 10 |
| 676 | 5 | 6 | 6 | 6 | 3 | 2.5 | 30 |
| 676 | 5 | 6 | 3 | 2 | 1 | 2   | 15 |
| 676 | 5 | 6 | 6 | 2 | 1 | 3   | 30 |
| 676 | 5 | 3 | 3 | 2 | 3 | 4   | 15 |
| 676 | 5 | 6 | 6 | 5 | 3 | 5.5 | 30 |
| 676 | 6 | 5 | 2 | 2 | 5 | 6   | 12 |
| 676 | 6 | 6 | 2 | 2 | 5 | 2.5 | 12 |
| 676 | 6 | 3 | 6 | 2 | 3 | 3   | 36 |
| 676 | 3 | 2 | 2 | 5 | 1 | 2.5 | 6  |
| 676 | 3 | 2 | 2 | 2 | 1 | 2.5 | 6  |
| 676 | 3 | 2 | 2 | 2 | 4 | 2   | 6  |
| 677 | 3 | 6 | 4 | 7 | 1 | 2.5 | 12 |
| 677 | 3 | 6 | 5 | 7 | 1 | 1   | 15 |
| 677 | 3 | 5 | 2 | 3 | 1 | 1.5 | 6  |
| 677 | 6 | 4 | 4 | 4 | 1 | 5.5 | 24 |

brand extension data

|     |   |   |   |   |   |     |    |
|-----|---|---|---|---|---|-----|----|
| 677 | 6 | 1 | 2 | 5 | 1 | 3.5 | 12 |
| 677 | 6 | 3 | 6 | 6 | 3 | 6   | 36 |
| 677 | 6 | 5 | 6 | 4 | 3 | 6   | 36 |
| 677 | 6 | 4 | 4 | 4 | 4 | 5   | 24 |
| 677 | 6 | 5 | 5 | 6 | 5 | 6   | 30 |
| 677 | 6 | 2 | 3 | 7 | 7 | 5   | 18 |
| 677 | 6 | 3 | 2 | 4 | 7 | 5   | 12 |
| 677 | 6 | 2 | 4 | 5 | 6 | 6.5 | 24 |
| 677 | 4 | 7 | 3 | 3 | 7 | 3   | 12 |
| 677 | 4 | 3 | 2 | 4 | 4 | 4.5 | 8  |
| 678 | 6 | 7 | 7 | 7 | 2 | 6.5 | 42 |
| 678 | 6 | 7 | 6 | 7 | 2 | 3   | 36 |
| 678 | 6 | 7 | 1 | 1 | 3 | 5   | 6  |
| 678 | 6 | 7 | 1 | 1 | 4 | 6   | 6  |
| 678 | 6 | 7 | 1 | 1 | 3 | 2.5 | 6  |
| 678 | 6 | 7 | 2 | 1 | 5 | 2   | 12 |
| 678 | 7 | 4 | 4 | 1 | 3 | 4   | 28 |
| 678 | 7 | 3 | 4 | 2 | 3 | 2   | 28 |
| 678 | 7 | 3 | 6 | 5 | 4 | 6.5 | 42 |
| 678 | 7 | 6 | 1 | 3 | 4 | 6.5 | 7  |
| 678 | 7 | 4 | 1 | 2 | 2 | 4   | 7  |
| 678 | 7 | 6 | 6 | 7 | 4 | 7   | 42 |
| 678 | 7 | 6 | 4 | 7 | 7 | 7   | 28 |
| 678 | 7 | 4 | 2 | 4 | 7 | 2   | 14 |
| 678 | 7 | 2 | 3 | 4 | 5 | 1.5 | 21 |
| 678 | 3 | 5 | 1 | 5 | 3 | 6.5 | 3  |
| 678 | 3 | 5 | 1 | 3 | 7 | 6   | 3  |
| 678 | 3 | 2 | 1 | 2 | 7 | 2.5 | 3  |
| 679 | 5 | 1 | 6 | 7 | 3 | 1.5 | 30 |
| 679 | 5 | 1 | 4 | 7 | 3 | 1   | 20 |
| 679 | 5 | 5 | 1 | 3 | 1 | 1   | 5  |
| 679 | 6 | 7 | 1 | 3 | 6 | 4.5 | 6  |
| 679 | 6 | 5 | 1 | 3 | 4 | 4.5 | 6  |
| 679 | 6 | 3 | 1 | 2 | 2 | 3   | 6  |
| 679 | 6 | 2 | 6 | 5 | 1 | 1   | 36 |
| 679 | 6 | 2 | 5 | 6 | 2 | 5   | 30 |
| 679 | 6 | 7 | 7 | 7 | 2 | 4   | 42 |
| 679 | 6 | 7 | 2 | 2 | 3 | 4   | 12 |
| 679 | 6 | 5 | 2 | 2 | 1 | 2   | 12 |
| 679 | 6 | 2 | 5 | 6 | 6 | 4   | 30 |
| 679 | 7 | 1 | 6 | 7 | 6 | 6   | 42 |
| 679 | 7 | 5 | 1 | 2 | 7 | 1.5 | 7  |
| 679 | 7 | 2 | 2 | 5 | 5 | 4   | 14 |
| 679 | 5 | 1 | 6 | 6 | 2 | 4.5 | 30 |
| 679 | 5 | 7 | 3 | 3 | 6 | 5   | 15 |
| 679 | 5 | 7 | 2 | 4 | 3 | 3.5 | 10 |
| 680 | 6 | 7 | 4 | 7 | 2 | 6.5 | 24 |
| 680 | 6 | 7 | 7 | 7 | 2 | 6   | 42 |
| 680 | 6 | 1 | 3 | 1 | 1 | 2   | 18 |
| 680 | 7 | 7 | 1 | 7 | 2 | 6.5 | 7  |
| 680 | 7 | 7 | 1 | 6 | 2 | 7   | 7  |

brand extension data

|     |   |   |   |   |   |     |    |
|-----|---|---|---|---|---|-----|----|
| 680 | 7 | 7 | 1 | 6 | 2 | 7   | 7  |
| 680 | 7 | 1 | 2 | 1 | 1 | 6   | 14 |
| 680 | 7 | 2 | 6 | 1 | 2 | 4.5 | 42 |
| 680 | 7 | 6 | 3 | 1 | 2 | 7   | 21 |
| 680 | 7 | 1 | 1 | 5 | 1 | 7   | 7  |
| 680 | 7 | 5 | 2 | 2 | 1 | 2   | 14 |
| 680 | 7 | 6 | 1 | 7 | 4 | 7   | 7  |
| 680 | 7 | 3 | 1 | 7 | 4 | 7   | 7  |
| 680 | 7 | 7 | 1 | 7 | 3 | 6   | 7  |
| 680 | 7 | 4 | 6 | 6 | 2 | 6.5 | 42 |
| 680 | 3 | 1 | 1 | 6 | 1 | 6.5 | 3  |
| 680 | 3 | 7 | 7 | 4 | 1 | 2.5 | 21 |
| 680 | 3 | 3 | 4 | 5 | 2 | 4   | 12 |
| 681 | 4 | 6 | 5 | 7 | 2 | 3.5 | 20 |
| 681 | 4 | 6 | 2 | 7 | 2 | 1.5 | 8  |
| 681 | 4 | 4 | 2 | 2 | 1 | 2.5 | 8  |
| 681 | 4 | 6 | 2 | 4 | 5 | 2   | 8  |
| 681 | 4 | 6 | 5 | 4 | 4 | 2.5 | 20 |
| 681 | 4 | 6 | 5 | 4 | 4 | 2   | 20 |
| 681 | 5 | 2 | 2 | 2 | 1 | 3   | 10 |
| 681 | 5 | 2 | 2 | 2 | 4 | 3.5 | 10 |
| 681 | 5 | 4 | 5 | 4 | 3 | 4   | 25 |
| 681 | 7 | 5 | 4 | 1 | 4 | 6   | 28 |
| 681 | 7 | 4 | 4 | 1 | 2 | 6   | 28 |
| 681 | 7 | 5 | 6 | 4 | 4 | 6.5 | 42 |
| 681 | 7 | 6 | 6 | 7 | 6 | 6.5 | 42 |
| 681 | 7 | 6 | 4 | 5 | 6 | 6   | 28 |
| 681 | 7 | 6 | 4 | 5 | 6 | 7   | 28 |
| 681 | 4 | 6 | 6 | 7 | 1 | 4   | 24 |
| 681 | 4 | 3 | 2 | 1 | 6 | 4.5 | 8  |
| 681 | 4 | 1 | 1 | 1 | 4 | 1.5 | 4  |
| 682 | 6 | 5 | 5 | 4 | 6 | 5   | 30 |
| 682 | 6 | 5 | 6 | 4 | 6 | 2   | 36 |
| 682 | 6 | 7 | 2 | 4 | 1 | 3   | 12 |
| 682 | 3 | 7 | 2 | 5 | 6 | 4   | 6  |
| 682 | 3 | 2 | 2 | 6 | 4 | 3   | 6  |
| 682 | 3 | 7 | 2 | 7 | 7 | 2.5 | 6  |
| 682 | 6 | 6 | 6 | 6 | 1 | 2.5 | 36 |
| 682 | 6 | 2 | 7 | 7 | 5 | 5.5 | 42 |
| 682 | 2 | 2 | 2 | 2 | 7 | 4   | 4  |
| 682 | 2 | 1 | 4 | 2 | 1 | 6   | 8  |
| 682 | 2 | 6 | 6 | 7 | 7 | 4.5 | 12 |
| 682 | 1 | 6 | 6 | 7 | 7 | 6   | 6  |
| 682 | 1 | 7 | 2 | 4 | 7 | 3   | 2  |
| 682 | 1 | 7 | 6 | 7 | 4 | 4.5 | 6  |
| 682 | 1 | 2 | 6 | 7 | 2 | 5.5 | 6  |
| 682 | 1 | 7 | 2 | 7 | 7 | 2   | 2  |
| 682 | 1 | 7 | 2 | 4 | 6 | 3   | 2  |
| 683 | 4 | 7 | 7 | 7 | 3 | 4.5 | 28 |
| 683 | 4 | 7 | 6 | 7 | 3 | 2   | 24 |
| 683 | 4 | 6 | 3 | 3 | 1 | 3   | 12 |

brand extension data

|     |   |   |   |   |   |     |    |
|-----|---|---|---|---|---|-----|----|
| 683 | 7 | 7 | 1 | 3 | 6 | 6   | 7  |
| 683 | 7 | 7 | 1 | 1 | 4 | 7   | 7  |
| 683 | 7 | 6 | 1 | 2 | 6 | 7   | 7  |
| 683 | 7 | 3 | 3 | 2 | 1 | 6   | 21 |
| 683 | 7 | 3 | 4 | 4 | 2 | 2   | 28 |
| 683 | 7 | 2 | 6 | 5 | 1 | 7   | 42 |
| 683 | 7 | 7 | 2 | 4 | 4 | 7   | 14 |
| 683 | 7 | 3 | 1 | 1 | 2 | 5   | 7  |
| 683 | 7 | 3 | 3 | 6 | 5 | 7   | 21 |
| 683 | 7 | 1 | 1 | 4 | 7 | 6   | 7  |
| 683 | 7 | 1 | 1 | 3 | 7 | 4.5 | 7  |
| 683 | 7 | 1 | 1 | 2 | 4 | 2   | 7  |
| 683 | 5 | 6 | 3 | 7 | 1 | 2.5 | 15 |
| 683 | 5 | 6 | 1 | 2 | 5 | 1   | 5  |
| 683 | 5 | 2 | 1 | 1 | 5 | 1.5 | 5  |
| 684 | 5 | 5 | 5 | 7 | 3 | 5.5 | 25 |
| 684 | 5 | 5 | 6 | 7 | 3 | 2   | 30 |
| 684 | 5 | 7 | 1 | 1 | 2 | 5.5 | 5  |
| 684 | 4 | 7 | 1 | 1 | 5 | 3   | 4  |
| 684 | 4 | 5 | 2 | 1 | 2 | 3.5 | 8  |
| 684 | 4 | 6 | 1 | 2 | 5 | 3.5 | 4  |
| 684 | 7 | 5 | 5 | 1 | 2 | 4   | 35 |
| 684 | 7 | 1 | 1 | 7 | 2 | 1.5 | 7  |
| 684 | 7 | 6 | 7 | 6 | 2 | 6.5 | 49 |
| 684 | 7 | 7 | 2 | 1 | 3 | 7   | 14 |
| 684 | 7 | 4 | 1 | 1 | 2 | 3   | 7  |
| 684 | 7 | 5 | 6 | 6 | 4 | 7   | 42 |
| 684 | 7 | 3 | 2 | 6 | 5 | 7   | 14 |
| 684 | 7 | 2 | 1 | 4 | 6 | 4.5 | 7  |
| 684 | 7 | 2 | 5 | 1 | 3 | 5   | 35 |
| 684 | 4 | 7 | 7 | 7 | 2 | 4   | 28 |
| 684 | 4 | 7 | 5 | 2 | 6 | 6   | 20 |
| 684 | 4 | 1 | 1 | 1 | 4 | 1.5 | 4  |
| 685 | 6 | 5 | 6 | 6 | 2 | 5   | 36 |
| 685 | 6 | 5 | 5 | 6 | 2 | 2.5 | 30 |
| 685 | 6 | 4 | 2 | 1 | 1 | 2   | 12 |
| 685 | 5 | 6 | 2 | 3 | 3 | 3   | 10 |
| 685 | 5 | 5 | 4 | 1 | 2 | 3.5 | 20 |
| 685 | 5 | 5 | 4 | 1 | 5 | 4   | 20 |
| 685 | 5 | 3 | 5 | 2 | 1 | 4   | 25 |
| 685 | 5 | 1 | 1 | 2 | 1 | 2.5 | 5  |
| 685 | 5 | 1 | 5 | 3 | 1 | 3   | 25 |
| 685 | 6 | 5 | 3 | 2 | 2 | 6   | 18 |
| 685 | 6 | 1 | 1 | 1 | 1 | 2.5 | 6  |
| 685 | 6 | 5 | 5 | 5 | 3 | 6   | 30 |
| 685 | 6 | 1 | 3 | 5 | 7 | 5   | 18 |
| 685 | 6 | 1 | 1 | 2 | 7 | 4.5 | 6  |
| 685 | 6 | 4 | 3 | 2 | 5 | 4.5 | 18 |
| 685 | 3 | 3 | 5 | 1 | 2 | 3   | 15 |
| 685 | 3 | 5 | 1 | 1 | 7 | 3   | 3  |
| 685 | 3 | 1 | 1 | 1 | 4 | 4   | 3  |

brand extension data

|     |   |   |   |   |   |     |    |
|-----|---|---|---|---|---|-----|----|
| 686 | 6 | 7 | 6 | 7 | 2 | 6   | 36 |
| 686 | 6 | 7 | 3 | 7 | 2 | 2   | 18 |
| 686 | 6 | 6 | 1 | 3 | 2 | 2   | 6  |
| 686 | 6 | 7 | 1 | 5 | 5 | 5.5 | 6  |
| 686 | 6 | 5 | 1 | 3 | 3 | 2.5 | 6  |
| 686 | 6 | 5 | 2 | 5 | 2 | 2.5 | 12 |
| 686 | 6 | 2 | 5 | 4 | 2 | 4   | 30 |
| 686 | 6 | 1 | 4 | 6 | 2 | 2.5 | 24 |
| 686 | 6 | 4 | 5 | 4 | 3 | 5   | 30 |
| 686 | 6 | 6 | 3 | 2 | 3 | 4   | 18 |
| 686 | 6 | 1 | 2 | 1 | 2 | 1.5 | 12 |
| 686 | 6 | 5 | 5 | 6 | 5 | 5   | 30 |
| 686 | 6 | 3 | 2 | 6 | 5 | 5   | 12 |
| 686 | 6 | 7 | 2 | 4 | 4 | 4.5 | 12 |
| 686 | 6 | 3 | 2 | 5 | 4 | 5.5 | 12 |
| 686 | 6 | 4 | 3 | 7 | 3 | 5   | 18 |
| 686 | 6 | 7 | 2 | 5 | 6 | 5   | 12 |
| 686 | 6 | 5 | 2 | 7 | 4 | 4   | 12 |
| 687 | 5 | 7 | 7 | 7 | 2 | 6   | 35 |
| 687 | 5 | 7 | 3 | 7 | 2 | 2.5 | 15 |
| 687 | 5 | 7 | 2 | 1 | 1 | 2.5 | 10 |
| 687 | 5 | 7 | 2 | 1 | 5 | 2.5 | 10 |
| 687 | 5 | 7 | 2 | 1 | 2 | 3   | 10 |
| 687 | 5 | 7 | 2 | 1 | 4 | 5.5 | 10 |
| 687 | 7 | 2 | 4 | 1 | 1 | 2.5 | 28 |
| 687 | 7 | 4 | 3 | 5 | 1 | 6   | 21 |
| 687 | 7 | 6 | 6 | 5 | 2 | 5.5 | 42 |
| 687 | 7 | 7 | 2 | 1 | 5 | 6   | 14 |
| 687 | 7 | 2 | 2 | 1 | 2 | 2.5 | 14 |
| 687 | 7 | 5 | 4 | 4 | 4 | 5.5 | 28 |
| 687 | 7 | 1 | 2 | 6 | 7 | 6   | 14 |
| 687 | 7 | 7 | 2 | 2 | 7 | 2.5 | 14 |
| 687 | 7 | 2 | 2 | 1 | 3 | 3.5 | 14 |
| 687 | 4 | 5 | 4 | 3 | 2 | 5.5 | 16 |
| 687 | 4 | 7 | 2 | 1 | 5 | 6   | 8  |
| 687 | 4 | 4 | 1 | 1 | 5 | 2.5 | 4  |
| 688 | 4 | 7 | 7 | 7 | 5 | 5.5 | 28 |
| 688 | 4 | 7 | 5 | 7 | 5 | 1.5 | 20 |
| 688 | 4 | 6 | 3 | 3 | 2 | 4   | 12 |
| 688 | 4 | 4 | 2 | 2 | 5 | 3.5 | 8  |
| 688 | 4 | 2 | 2 | 3 | 3 | 3.5 | 8  |
| 688 | 4 | 4 | 2 | 2 | 6 | 2   | 8  |
| 688 | 7 | 5 | 5 | 6 | 2 | 7   | 35 |
| 688 | 7 | 1 | 1 | 2 | 3 | 3   | 7  |
| 688 | 7 | 7 | 6 | 6 | 2 | 7   | 42 |
| 688 | 7 | 5 | 5 | 5 | 4 | 7   | 35 |
| 688 | 7 | 2 | 2 | 2 | 1 | 4.5 | 14 |
| 688 | 7 | 7 | 6 | 6 | 5 | 7   | 42 |
| 688 | 7 | 2 | 1 | 5 | 4 | 5.5 | 7  |
| 688 | 7 | 2 | 4 | 4 | 6 | 4.5 | 28 |
| 688 | 7 | 7 | 4 | 6 | 5 | 5.5 | 28 |

brand extension data

|     |   |   |   |   |   |     |    |
|-----|---|---|---|---|---|-----|----|
| 688 | 5 | 7 | 6 | 7 | 3 | 6   | 30 |
| 688 | 5 | 1 | 1 | 3 | 7 | 6   | 5  |
| 688 | 5 | 1 | 1 | 1 | 5 | 2   | 5  |
| 689 | 5 | 7 | 2 | 7 | 4 | 5   | 10 |
| 689 | 5 | 7 | 1 | 7 | 4 | 4   | 5  |
| 689 | 5 | 7 | 1 | 5 | 1 | 5.5 | 5  |
| 689 | 6 | 7 | 1 | 2 | 5 | 4.5 | 6  |
| 689 | 6 | 7 | 1 | 1 | 2 | 5.5 | 6  |
| 689 | 6 | 7 | 1 | 2 | 5 | 6.5 | 6  |
| 689 | 7 | 5 | 3 | 6 | 1 | 7   | 21 |
| 689 | 7 | 2 | 1 | 5 | 2 | 4   | 7  |
| 689 | 7 | 6 | 3 | 6 | 2 | 7   | 21 |
| 689 | 6 | 5 | 1 | 5 | 1 | 6.5 | 6  |
| 689 | 6 | 1 | 1 | 2 | 1 | 4   | 6  |
| 689 | 6 | 6 | 2 | 7 | 5 | 7   | 12 |
| 689 | 6 | 1 | 1 | 5 | 7 | 7   | 6  |
| 689 | 6 | 6 | 1 | 4 | 7 | 6   | 6  |
| 689 | 6 | 5 | 1 | 3 | 4 | 5.5 | 6  |
| 689 | 6 | 6 | 2 | 7 | 3 | 6.5 | 12 |
| 689 | 6 | 7 | 1 | 5 | 6 | 6.5 | 6  |
| 689 | 6 | 4 | 1 | 3 | 4 | 6.5 | 6  |
| 690 | 3 | 7 | 5 | 7 | 3 | 3.5 | 15 |
| 690 | 3 | 7 | 1 | 7 | 3 | 7   | 3  |
| 690 | 3 | 7 | 2 | 5 | 3 | 7   | 6  |
| 690 | 3 | 7 | 3 | 5 | 5 | 3.5 | 9  |
| 690 | 3 | 5 | 1 | 3 | 3 | 4   | 3  |
| 690 | 3 | 4 | 4 | 3 | 6 | 2.5 | 12 |
| 690 | 7 | 7 | 7 | 5 | 3 | 7   | 49 |
| 690 | 7 | 4 | 6 | 7 | 4 | 7   | 42 |
| 690 | 7 | 7 | 7 | 7 | 3 | 7   | 49 |
| 690 | 7 | 7 | 7 | 7 | 3 | 7   | 49 |
| 690 | 7 | 7 | 6 | 7 | 3 | 7   | 42 |
| 690 | 7 | 4 | 4 | 4 | 4 | 4.5 | 28 |
| 690 | 6 | 7 | 7 | 7 | 6 | 2.5 | 42 |
| 690 | 6 | 5 | 4 | 7 | 4 | 5.5 | 24 |
| 690 | 6 | 4 | 2 | 7 | 5 | 5.5 | 12 |
| 690 | 6 | 7 | 4 | 5 | 3 | 6.5 | 24 |
| 690 | 6 | 7 | 1 | 3 | 3 | 4   | 6  |
| 690 | 6 | 2 | 1 | 2 | 5 | 3   | 6  |
| 691 | 4 | 7 | 4 | 6 | 5 | 5   | 16 |
| 691 | 4 | 7 | 3 | 6 | 5 | 5   | 12 |
| 691 | 4 | 6 | 1 | 2 | 1 | 5   | 4  |
| 691 | 6 | 6 | 1 | 1 | 6 | 3   | 6  |
| 691 | 6 | 1 | 1 | 1 | 4 | 3   | 6  |
| 691 | 6 | 2 | 2 | 2 | 7 | 3.5 | 12 |
| 691 | 6 | 1 | 2 | 3 | 1 | 5   | 12 |
| 691 | 6 | 1 | 1 | 5 | 2 | 6   | 6  |
| 691 | 6 | 2 | 5 | 4 | 2 | 5.5 | 30 |
| 691 | 6 | 3 | 3 | 2 | 5 | 5.5 | 18 |
| 691 | 6 | 1 | 1 | 1 | 3 | 6   | 6  |
| 691 | 6 | 4 | 2 | 6 | 7 | 5.5 | 12 |

brand extension data

|     |   |   |   |   |   |     |    |
|-----|---|---|---|---|---|-----|----|
| 691 | 6 | 1 | 1 | 5 | 5 | 3.5 | 6  |
| 691 | 6 | 6 | 1 | 4 | 7 | 4.5 | 6  |
| 691 | 6 | 4 | 2 | 4 | 6 | 3.5 | 12 |
| 691 | 5 | 4 | 3 | 6 | 2 | 3.5 | 15 |
| 691 | 5 | 5 | 1 | 6 | 6 | 2.5 | 5  |
| 691 | 5 | 3 | 1 | 5 | 5 | 4   | 5  |
| 692 | 4 | 4 | 4 | 6 | 3 | 4   | 16 |
| 692 | 4 | 4 | 2 | 6 | 3 | 4.5 | 8  |
| 692 | 4 | 2 | 1 | 6 | 2 | 3   | 4  |
| 692 | 4 | 7 | 6 | 2 | 6 | 3   | 24 |
| 692 | 4 | 3 | 4 | 5 | 3 | 3.5 | 16 |
| 692 | 4 | 5 | 2 | 5 | 4 | 4   | 8  |
| 692 | 6 | 2 | 4 | 5 | 2 | 4   | 24 |
| 692 | 6 | 4 | 4 | 6 | 4 | 2.5 | 24 |
| 692 | 6 | 4 | 4 | 4 | 3 | 5   | 24 |
| 692 | 4 | 5 | 5 | 5 | 2 | 4   | 20 |
| 692 | 4 | 6 | 5 | 6 | 3 | 3   | 20 |
| 692 | 4 | 6 | 5 | 5 | 3 | 3   | 20 |
| 692 | 7 | 6 | 6 | 3 | 6 | 6   | 42 |
| 692 | 7 | 6 | 6 | 5 | 5 | 5   | 42 |
| 692 | 7 | 2 | 3 | 2 | 4 | 4.5 | 21 |
| 692 | 5 | 7 | 7 | 1 | 1 | 6   | 35 |
| 692 | 5 | 1 | 2 | 4 | 5 | 2.5 | 10 |
| 692 | 5 | 2 | 2 | 3 | 5 | 2.5 | 10 |
| 695 | 4 | 4 | 3 | 7 | 2 | 3   | 12 |
| 695 | 4 | 4 | 3 | 7 | 2 | 3.5 | 12 |
| 695 | 4 | 1 | 3 | 1 | 1 | 4   | 12 |
| 695 | 4 | 4 | 4 | 4 | 2 | 3   | 16 |
| 695 | 4 | 5 | 3 | 3 | 2 | 1.5 | 12 |
| 695 | 4 | 6 | 5 | 4 | 4 | 3   | 20 |
| 695 | 6 | 1 | 1 | 2 | 1 | 5.5 | 6  |
| 695 | 6 | 1 | 1 | 4 | 3 | 5.5 | 6  |
| 695 | 6 | 1 | 1 | 4 | 1 | 5.5 | 6  |
| 695 | 5 | 2 | 4 | 3 | 2 | 5.5 | 20 |
| 695 | 5 | 2 | 5 | 2 | 1 | 3.5 | 25 |
| 695 | 5 | 4 | 4 | 5 | 4 | 5.5 | 20 |
| 695 | 6 | 3 | 6 | 6 | 4 | 6   | 36 |
| 695 | 6 | 6 | 6 | 5 | 5 | 6   | 36 |
| 695 | 6 | 3 | 5 | 3 | 4 | 6   | 30 |
| 695 | 3 | 6 | 1 | 7 | 1 | 3.5 | 3  |
| 695 | 3 | 6 | 1 | 1 | 7 | 2.5 | 3  |
| 695 | 3 | 2 | 1 | 1 | 7 | 2   | 3  |
| 696 | 6 | 7 | 7 | 7 | 5 | 6.5 | 42 |
| 696 | 6 | 7 | 5 | 7 | 5 | 3   | 30 |
| 696 | 6 | 6 | 3 | 2 | 2 | 2.5 | 18 |
| 696 | 6 | 5 | 1 | 2 | 4 | 3.5 | 6  |
| 696 | 6 | 4 | 3 | 3 | 3 | 3.5 | 18 |
| 696 | 6 | 6 | 3 | 3 | 2 | 2.5 | 18 |
| 696 | 6 | 2 | 2 | 4 | 2 | 2.5 | 12 |
| 696 | 6 | 3 | 3 | 4 | 2 | 2.5 | 18 |
| 696 | 6 | 6 | 6 | 5 | 2 | 4.5 | 36 |

brand extension data

|     |   |   |   |   |   |     |    |
|-----|---|---|---|---|---|-----|----|
| 696 | 6 | 5 | 5 | 2 | 4 | 3.5 | 30 |
| 696 | 6 | 2 | 2 | 1 | 2 | 3.5 | 12 |
| 696 | 6 | 6 | 5 | 5 | 5 | 5.5 | 30 |
| 696 | 6 | 3 | 3 | 5 | 6 | 3   | 18 |
| 696 | 6 | 1 | 2 | 2 | 7 | 1.5 | 12 |
| 696 | 6 | 6 | 5 | 5 | 5 | 5   | 30 |
| 696 | 2 | 3 | 5 | 6 | 2 | 2.5 | 10 |
| 696 | 2 | 6 | 2 | 2 | 6 | 1.5 | 4  |
| 696 | 2 | 1 | 1 | 2 | 4 | 2   | 2  |
| 697 | 5 | 6 | 2 | 5 | 1 | 5   | 10 |
| 697 | 5 | 6 | 6 | 5 | 1 | 3.5 | 30 |
| 697 | 5 | 5 | 1 | 1 | 3 | 3.5 | 5  |
| 697 | 2 | 6 | 2 | 3 | 3 | 2   | 4  |
| 697 | 2 | 7 | 3 | 2 | 5 | 1.5 | 6  |
| 697 | 2 | 5 | 3 | 2 | 4 | 2.5 | 6  |
| 697 | 6 | 4 | 2 | 1 | 3 | 5   | 12 |
| 697 | 6 | 2 | 3 | 3 | 3 | 5   | 18 |
| 697 | 6 | 3 | 6 | 1 | 3 | 5.5 | 36 |
| 697 | 7 | 5 | 2 | 6 | 2 | 5   | 14 |
| 697 | 7 | 4 | 3 | 4 | 2 | 7   | 21 |
| 697 | 7 | 6 | 5 | 6 | 1 | 6.5 | 35 |
| 697 | 6 | 5 | 4 | 5 | 5 | 4.5 | 24 |
| 697 | 6 | 6 | 1 | 3 | 3 | 4   | 6  |
| 697 | 6 | 3 | 1 | 2 | 5 | 3.5 | 6  |
| 697 | 2 | 5 | 4 | 3 | 3 | 4   | 8  |
| 697 | 2 | 2 | 2 | 6 | 2 | 2   | 4  |
| 697 | 2 | 3 | 3 | 3 | 3 | 4   | 6  |
| 698 | 5 | 7 | 2 | 7 | 5 | 5   | 10 |
| 698 | 5 | 7 | 2 | 7 | 5 | 2   | 10 |
| 698 | 5 | 4 | 1 | 3 | 2 | 2   | 5  |
| 698 | 6 | 3 | 1 | 2 | 5 | 3   | 6  |
| 698 | 6 | 2 | 1 | 1 | 2 | 1.5 | 6  |
| 698 | 6 | 1 | 1 | 2 | 5 | 3   | 6  |
| 698 | 6 | 6 | 4 | 4 | 2 | 3.5 | 24 |
| 698 | 6 | 4 | 2 | 6 | 3 | 5   | 12 |
| 698 | 6 | 7 | 7 | 5 | 3 | 4.5 | 42 |
| 698 | 6 | 4 | 2 | 3 | 4 | 6   | 12 |
| 698 | 6 | 3 | 1 | 2 | 4 | 3.5 | 6  |
| 698 | 6 | 7 | 5 | 5 | 5 | 6.5 | 30 |
| 698 | 6 | 1 | 2 | 5 | 5 | 6.5 | 12 |
| 698 | 6 | 2 | 2 | 3 | 5 | 2.5 | 12 |
| 698 | 6 | 5 | 3 | 4 | 4 | 4.5 | 18 |
| 698 | 3 | 7 | 7 | 1 | 1 | 2.5 | 21 |
| 698 | 3 | 1 | 2 | 1 | 2 | 1   | 6  |
| 698 | 3 | 1 | 2 | 1 | 3 | 1   | 6  |
| 699 | 4 | 4 | 6 | 7 | 5 | 3   | 24 |
| 699 | 4 | 4 | 1 | 7 | 5 | 2.5 | 4  |
| 699 | 4 | 7 | 1 | 2 | 3 | 1.5 | 4  |
| 699 | 4 | 6 | 1 | 2 | 6 | 2.5 | 4  |
| 699 | 4 | 4 | 1 | 2 | 7 | 2.5 | 4  |
| 699 | 4 | 7 | 3 | 2 | 7 | 2   | 12 |

brand extension data

|     |   |   |   |   |   |     |    |
|-----|---|---|---|---|---|-----|----|
| 699 | 7 | 7 | 7 | 7 | 3 | 5   | 49 |
| 699 | 7 | 1 | 7 | 3 | 3 | 5.5 | 49 |
| 699 | 7 | 7 | 7 | 7 | 5 | 6   | 49 |
| 699 | 6 | 7 | 6 | 7 | 5 | 6   | 36 |
| 699 | 6 | 4 | 3 | 3 | 4 | 4   | 18 |
| 699 | 6 | 1 | 4 | 6 | 4 | 6   | 24 |
| 699 | 7 | 2 | 5 | 7 | 7 | 5   | 35 |
| 699 | 7 | 3 | 6 | 3 | 7 | 4   | 42 |
| 699 | 7 | 2 | 1 | 2 | 5 | 6.5 | 7  |
| 699 | 5 | 5 | 5 | 7 | 2 | 5.5 | 25 |
| 699 | 5 | 5 | 5 | 5 | 7 | 7   | 25 |
| 699 | 5 | 3 | 6 | 1 | 2 | 2   | 30 |
| 700 | 7 | 7 | 6 | 7 | 7 | 7   | 42 |
| 700 | 7 | 7 | 3 | 7 | 7 | 7   | 21 |
| 700 | 7 | 3 | 1 | 1 | 7 | 2.5 | 7  |
| 700 | 4 | 4 | 1 | 2 | 7 | 2   | 4  |
| 700 | 4 | 5 | 1 | 2 | 7 | 5   | 4  |
| 700 | 4 | 3 | 1 | 2 | 7 | 1   | 4  |
| 700 | 7 | 1 | 1 | 2 | 7 | 5   | 7  |
| 700 | 7 | 1 | 2 | 5 | 5 | 6   | 14 |
| 700 | 7 | 4 | 4 | 4 | 5 | 6.5 | 28 |
| 700 | 4 | 4 | 1 | 2 | 7 | 5   | 4  |
| 700 | 4 | 3 | 1 | 1 | 6 | 6   | 4  |
| 700 | 4 | 6 | 5 | 5 | 6 | 4   | 20 |
| 700 | 5 | 1 | 4 | 7 | 6 | 4.5 | 20 |
| 700 | 5 | 1 | 1 | 3 | 7 | 6   | 5  |
| 700 | 5 | 2 | 4 | 6 | 7 | 6.5 | 20 |
| 700 | 4 | 1 | 7 | 3 | 4 | 6   | 28 |
| 700 | 4 | 5 | 5 | 2 | 4 | 3.5 | 20 |
| 700 | 4 | 2 | 7 | 7 | 2 | 3.5 | 28 |
| 701 | 7 | 5 | 2 | 7 | 5 | 6   | 14 |
| 701 | 7 | 5 | 2 | 7 | 5 | 3   | 14 |
| 701 | 7 | 2 | 1 | 2 | 1 | 2.5 | 7  |
| 701 | 5 | 7 | 1 | 2 | 6 | 2.5 | 5  |
| 701 | 5 | 5 | 1 | 3 | 3 | 5.5 | 5  |
| 701 | 5 | 5 | 1 | 4 | 5 | 4.5 | 5  |
| 701 | 6 | 2 | 4 | 2 | 1 | 3.5 | 24 |
| 701 | 6 | 3 | 3 | 4 | 2 | 4   | 18 |
| 701 | 6 | 4 | 6 | 5 | 3 | 6   | 36 |
| 701 | 6 | 2 | 2 | 2 | 4 | 5.5 | 12 |
| 701 | 6 | 2 | 2 | 2 | 3 | 5.5 | 12 |
| 701 | 6 | 2 | 5 | 5 | 4 | 6   | 30 |
| 701 | 6 | 3 | 2 | 6 | 5 | 6.5 | 12 |
| 701 | 6 | 4 | 2 | 4 | 6 | 4   | 12 |
| 701 | 6 | 4 | 4 | 4 | 5 | 5.5 | 24 |
| 701 | 3 | 7 | 6 | 6 | 2 | 3   | 18 |
| 701 | 3 | 7 | 2 | 2 | 3 | 3.5 | 6  |
| 701 | 3 | 2 | 2 | 2 | 2 | 3   | 6  |
| 702 | 7 | 7 | 5 | 7 | 4 | 4.5 | 35 |
| 702 | 7 | 7 | 1 | 7 | 4 | 4.5 | 7  |
| 702 | 7 | 7 | 1 | 1 | 3 | 3   | 7  |

brand extension data

|     |   |   |   |   |   |     |    |
|-----|---|---|---|---|---|-----|----|
| 702 | 7 | 7 | 1 | 1 | 7 | 7   | 7  |
| 702 | 7 | 7 | 1 | 1 | 3 | 4.5 | 7  |
| 702 | 7 | 1 | 1 | 1 | 6 | 7   | 7  |
| 702 | 7 | 7 | 7 | 3 | 3 | 6.5 | 49 |
| 702 | 7 | 1 | 5 | 1 | 3 | 3.5 | 35 |
| 702 | 7 | 5 | 7 | 5 | 2 | 6.5 | 49 |
| 702 | 7 | 7 | 6 | 4 | 3 | 7   | 42 |
| 702 | 7 | 2 | 5 | 3 | 1 | 4   | 35 |
| 702 | 7 | 5 | 7 | 5 | 4 | 7   | 49 |
| 702 | 7 | 2 | 4 | 7 | 7 | 7   | 28 |
| 702 | 7 | 2 | 1 | 5 | 7 | 5   | 7  |
| 702 | 7 | 7 | 7 | 5 | 5 | 4.5 | 49 |
| 702 | 3 | 7 | 7 | 7 | 1 | 2   | 21 |
| 702 | 3 | 5 | 1 | 1 | 7 | 3.5 | 3  |
| 702 | 3 | 4 | 3 | 1 | 3 | 2.5 | 9  |
| 703 | 5 | 5 | 6 | 6 | 2 | 3   | 30 |
| 703 | 5 | 5 | 5 | 6 | 2 | 3   | 25 |
| 703 | 5 | 5 | 1 | 2 | 1 | 3   | 5  |
| 703 | 5 | 7 | 4 | 2 | 5 | 4.5 | 20 |
| 703 | 5 | 7 | 2 | 1 | 2 | 3   | 10 |
| 703 | 5 | 7 | 4 | 3 | 4 | 4.5 | 20 |
| 703 | 6 | 4 | 3 | 2 | 1 | 2.5 | 18 |
| 703 | 6 | 1 | 1 | 1 | 1 | 2.5 | 6  |
| 703 | 6 | 6 | 6 | 5 | 2 | 6.5 | 36 |
| 703 | 6 | 7 | 6 | 4 | 3 | 6.5 | 36 |
| 703 | 6 | 3 | 4 | 2 | 2 | 2.5 | 24 |
| 703 | 6 | 5 | 6 | 6 | 5 | 6.5 | 36 |
| 703 | 6 | 2 | 2 | 7 | 5 | 3   | 12 |
| 703 | 6 | 6 | 5 | 5 | 6 | 5   | 30 |
| 703 | 6 | 3 | 3 | 3 | 3 | 4   | 18 |
| 703 | 5 | 6 | 7 | 7 | 2 | 5.5 | 35 |
| 703 | 5 | 5 | 5 | 5 | 6 | 5   | 25 |
| 703 | 5 | 1 | 1 | 1 | 5 | 2.5 | 5  |
| 704 | 5 | 6 | 4 | 7 | 4 | 5   | 20 |
| 704 | 5 | 6 | 2 | 7 | 4 | 1.5 | 10 |
| 704 | 5 | 4 | 1 | 2 | 2 | 1   | 5  |
| 704 | 7 | 7 | 1 | 6 | 4 | 4   | 7  |
| 704 | 7 | 4 | 1 | 2 | 3 | 5.5 | 7  |
| 704 | 7 | 7 | 1 | 3 | 5 | 4   | 7  |
| 704 | 7 | 5 | 1 | 2 | 2 | 4   | 7  |
| 704 | 7 | 2 | 4 | 4 | 3 | 5   | 28 |
| 704 | 7 | 6 | 5 | 4 | 1 | 4   | 35 |
| 704 | 6 | 7 | 5 | 2 | 4 | 7   | 30 |
| 704 | 6 | 7 | 5 | 2 | 1 | 6.5 | 30 |
| 704 | 6 | 7 | 5 | 2 | 3 | 5.5 | 30 |
| 704 | 7 | 5 | 1 | 7 | 6 | 6   | 7  |
| 704 | 7 | 4 | 1 | 5 | 5 | 2.5 | 7  |
| 704 | 7 | 7 | 6 | 5 | 5 | 6.5 | 42 |
| 704 | 3 | 1 | 1 | 2 | 1 | 2   | 3  |
| 704 | 3 | 5 | 1 | 1 | 7 | 1   | 3  |
| 704 | 3 | 5 | 1 | 4 | 4 | 2   | 3  |

brand extension data

|     |   |   |   |   |   |     |    |
|-----|---|---|---|---|---|-----|----|
| 705 | 3 | 2 | 1 | 3 | 4 | 4.5 | 3  |
| 705 | 3 | 2 | 4 | 3 | 4 | 2   | 12 |
| 705 | 3 | 3 | 4 | 3 | 5 | 2   | 12 |
| 705 | 5 | 3 | 3 | 4 | 5 | 2   | 15 |
| 705 | 3 | 5 | 4 | 4 | 4 | 2   | 12 |
| 705 | 5 | 2 | 3 | 4 | 3 | 6.5 | 15 |
| 705 | 5 | 3 | 4 | 3 | 3 | 6   | 20 |
| 705 | 5 | 6 | 3 | 4 | 3 | 6   | 15 |
| 705 | 3 | 4 | 5 | 4 | 5 | 6   | 15 |
| 705 | 3 | 5 | 5 | 3 | 6 | 5.5 | 15 |
| 705 | 5 | 3 | 3 | 4 | 3 | 2.5 | 15 |
| 705 | 5 | 3 | 5 | 3 | 6 | 2   | 25 |
| 705 | 5 | 4 | 3 | 4 | 3 | 2.5 | 15 |
| 706 | 5 | 5 | 5 | 7 | 6 | 2.5 | 25 |
| 706 | 5 | 5 | 5 | 7 | 6 | 2.5 | 25 |
| 706 | 5 | 3 | 1 | 1 | 6 | 2.5 | 5  |
| 706 | 5 | 5 | 1 | 1 | 6 | 2.5 | 5  |
| 706 | 5 | 4 | 1 | 1 | 6 | 2.5 | 5  |
| 706 | 5 | 1 | 1 | 1 | 6 | 2.5 | 5  |
| 706 | 5 | 1 | 1 | 1 | 6 | 2.5 | 5  |
| 706 | 5 | 1 | 5 | 1 | 6 | 2.5 | 25 |
| 706 | 6 | 1 | 1 | 1 | 6 | 2.5 | 6  |
| 706 | 6 | 1 | 1 | 1 | 6 | 2.5 | 6  |
| 706 | 6 | 4 | 5 | 3 | 6 | 2.5 | 30 |
| 706 | 6 | 1 | 1 | 4 | 6 | 2.5 | 6  |
| 706 | 6 | 5 | 1 | 1 | 6 | 2.5 | 6  |
| 706 | 6 | 1 | 1 | 3 | 6 | 2.5 | 6  |
| 706 | 5 | 1 | 5 | 5 | 6 | 2.5 | 25 |
| 706 | 5 | 5 | 1 | 3 | 6 | 2.5 | 5  |
| 706 | 5 | 1 | 1 | 1 | 6 | 2.5 | 5  |
| 707 | 5 | 5 | 5 | 7 | 4 | 5   | 25 |
| 707 | 5 | 5 | 3 | 7 | 4 | 2.5 | 15 |
| 707 | 5 | 7 | 1 | 2 | 1 | 4   | 5  |
| 707 | 6 | 7 | 1 | 4 | 7 | 4.5 | 6  |
| 707 | 6 | 5 | 1 | 3 | 1 | 3.5 | 6  |
| 707 | 6 | 1 | 1 | 4 | 5 | 4   | 6  |
| 707 | 6 | 4 | 6 | 2 | 1 | 3.5 | 36 |
| 707 | 6 | 1 | 1 | 1 | 2 | 2   | 6  |
| 707 | 6 | 2 | 6 | 7 | 3 | 5   | 36 |
| 707 | 7 | 4 | 1 | 7 | 4 | 7   | 7  |
| 707 | 7 | 1 | 1 | 4 | 2 | 2.5 | 7  |
| 707 | 7 | 6 | 1 | 6 | 6 | 5.5 | 7  |
| 707 | 7 | 7 | 1 | 7 | 7 | 7   | 7  |
| 707 | 7 | 7 | 1 | 4 | 6 | 4   | 7  |
| 707 | 7 | 1 | 4 | 5 | 4 | 5.5 | 28 |
| 707 | 5 | 7 | 4 | 7 | 1 | 5   | 20 |
| 707 | 5 | 4 | 4 | 4 | 4 | 3   | 20 |
| 707 | 5 | 1 | 1 | 3 | 4 | 4   | 5  |
| 708 | 7 | 7 | 6 | 7 | 2 | 5.5 | 42 |
| 708 | 7 | 7 | 4 | 7 | 2 | 2.5 | 28 |

brand extension data

|     |   |   |   |   |   |     |    |
|-----|---|---|---|---|---|-----|----|
| 708 | 7 | 7 | 1 | 2 | 1 | 4.5 | 7  |
| 708 | 7 | 7 | 2 | 2 | 2 | 7   | 14 |
| 708 | 7 | 7 | 3 | 3 | 2 | 3   | 21 |
| 708 | 7 | 7 | 3 | 3 | 3 | 3   | 21 |
| 708 | 7 | 6 | 2 | 2 | 1 | 3   | 14 |
| 708 | 7 | 2 | 1 | 6 | 1 | 3.5 | 7  |
| 708 | 7 | 6 | 7 | 7 | 2 | 7   | 49 |
| 708 | 7 | 6 | 2 | 2 | 2 | 7   | 14 |
| 708 | 7 | 5 | 7 | 7 | 3 | 7   | 49 |
| 708 | 7 | 1 | 1 | 7 | 7 | 7   | 7  |
| 708 | 7 | 1 | 1 | 5 | 4 | 4.5 | 7  |
| 708 | 7 | 2 | 4 | 4 | 4 | 7   | 28 |
| 708 | 7 | 1 | 3 | 7 | 1 | 3   | 21 |
| 708 | 7 | 7 | 2 | 4 | 7 | 6   | 14 |
| 708 | 7 | 2 | 1 | 4 | 2 | 5.5 | 7  |
| 709 | 4 | 1 | 7 | 7 | 4 | 4   | 28 |
| 709 | 4 | 1 | 6 | 7 | 4 | 1   | 24 |
| 709 | 4 | 5 | 1 | 1 | 1 | 1   | 4  |
| 709 | 7 | 7 | 1 | 4 | 4 | 6.5 | 7  |
| 709 | 7 | 7 | 4 | 3 | 2 | 7   | 28 |
| 709 | 7 | 7 | 4 | 4 | 6 | 7   | 28 |
| 709 | 7 | 4 | 3 | 4 | 1 | 6   | 21 |
| 709 | 7 | 1 | 1 | 5 | 1 | 4.5 | 7  |
| 709 | 7 | 6 | 7 | 6 | 1 | 7   | 49 |
| 709 | 5 | 6 | 2 | 5 | 1 | 7   | 10 |
| 709 | 5 | 1 | 1 | 1 | 1 | 4   | 5  |
| 709 | 5 | 5 | 5 | 7 | 4 | 7   | 25 |
| 709 | 5 | 4 | 1 | 7 | 6 | 6.5 | 5  |
| 709 | 5 | 7 | 1 | 4 | 7 | 4   | 5  |
| 709 | 5 | 1 | 1 | 4 | 5 | 4   | 5  |
| 709 | 1 | 1 | 4 | 6 | 1 | 5   | 4  |
| 709 | 1 | 6 | 1 | 1 | 6 | 1   | 1  |
| 709 | 1 | 1 | 1 | 1 | 3 | 1   | 1  |
| 710 | 4 | 4 | 7 | 7 | 3 | 5.5 | 28 |
| 710 | 4 | 4 | 5 | 7 | 3 | 3   | 20 |
| 710 | 4 | 7 | 3 | 1 | 1 | 2   | 12 |
| 710 | 4 | 6 | 3 | 1 | 5 | 2.5 | 12 |
| 710 | 4 | 2 | 1 | 2 | 1 | 2.5 | 4  |
| 710 | 4 | 6 | 2 | 3 | 3 | 1.5 | 8  |
| 710 | 6 | 6 | 4 | 5 | 1 | 4   | 24 |
| 710 | 6 | 2 | 3 | 4 | 3 | 4   | 18 |
| 710 | 6 | 2 | 7 | 7 | 1 | 6   | 42 |
| 710 | 6 | 6 | 1 | 2 | 2 | 6   | 6  |
| 710 | 6 | 3 | 1 | 2 | 1 | 2.5 | 6  |
| 710 | 6 | 6 | 6 | 6 | 4 | 5.5 | 36 |
| 710 | 7 | 3 | 4 | 6 | 5 | 6   | 28 |
| 710 | 7 | 7 | 3 | 3 | 6 | 2.5 | 21 |
| 710 | 7 | 4 | 5 | 3 | 4 | 6.5 | 35 |
| 710 | 2 | 1 | 7 | 7 | 2 | 3   | 14 |
| 710 | 2 | 7 | 1 | 1 | 7 | 3.5 | 2  |
| 710 | 2 | 1 | 1 | 3 | 3 | 4   | 2  |

brand extension data

|     |   |   |   |   |   |     |    |
|-----|---|---|---|---|---|-----|----|
| 711 | 6 | 2 | 6 | 7 | 6 | 5   | 36 |
| 711 | 6 | 2 | 3 | 7 | 6 | 2   | 18 |
| 711 | 6 | 6 | 2 | 5 | 4 | 1.5 | 12 |
| 711 | 7 | 7 | 2 | 6 | 7 | 1.5 | 14 |
| 711 | 7 | 5 | 2 | 3 | 3 | 3   | 14 |
| 711 | 7 | 7 | 2 | 5 | 5 | 5.5 | 14 |
| 711 | 7 | 1 | 5 | 1 | 4 | 2   | 35 |
| 711 | 7 | 1 | 1 | 2 | 5 | 3   | 7  |
| 711 | 7 | 1 | 6 | 7 | 4 | 6.5 | 42 |
| 711 | 6 | 5 | 2 | 2 | 3 | 2.5 | 12 |
| 711 | 6 | 3 | 1 | 2 | 5 | 2.5 | 6  |
| 711 | 6 | 2 | 1 | 2 | 4 | 3   | 6  |
| 711 | 5 | 5 | 5 | 6 | 6 | 6   | 25 |
| 711 | 5 | 6 | 2 | 3 | 6 | 3.5 | 10 |
| 711 | 5 | 5 | 4 | 3 | 5 | 5.5 | 20 |
| 711 | 4 | 1 | 6 | 6 | 3 | 2   | 24 |
| 711 | 4 | 6 | 1 | 6 | 7 | 1.5 | 4  |
| 711 | 4 | 2 | 1 | 6 | 3 | 3   | 4  |
| 712 | 4 | 2 | 7 | 7 | 2 | 3   | 28 |
| 712 | 4 | 2 | 4 | 7 | 2 | 2   | 16 |
| 712 | 4 | 5 | 3 | 2 | 2 | 1.5 | 12 |
| 712 | 3 | 6 | 1 | 5 | 4 | 2.5 | 3  |
| 712 | 3 | 5 | 1 | 3 | 2 | 2   | 3  |
| 712 | 3 | 5 | 2 | 3 | 5 | 1.5 | 6  |
| 712 | 7 | 2 | 6 | 3 | 2 | 6   | 42 |
| 712 | 7 | 6 | 3 | 5 | 2 | 5.5 | 21 |
| 712 | 7 | 3 | 7 | 6 | 2 | 6.5 | 49 |
| 712 | 6 | 6 | 2 | 3 | 3 | 6.5 | 12 |
| 712 | 6 | 6 | 2 | 3 | 2 | 6.5 | 12 |
| 712 | 6 | 2 | 6 | 5 | 4 | 6.5 | 36 |
| 712 | 5 | 2 | 6 | 6 | 5 | 5.5 | 30 |
| 712 | 5 | 2 | 1 | 4 | 7 | 6   | 5  |
| 712 | 5 | 5 | 2 | 4 | 4 | 6   | 10 |
| 712 | 2 | 3 | 6 | 6 | 2 | 2.5 | 12 |
| 712 | 2 | 3 | 1 | 2 | 7 | 1.5 | 2  |
| 712 | 2 | 3 | 1 | 1 | 2 | 1   | 2  |
| 713 | 4 | 2 | 2 | 6 | 4 | 2   | 8  |
| 713 | 4 | 2 | 5 | 6 | 4 | 2   | 20 |
| 713 | 4 | 5 | 7 | 2 | 1 | 1.5 | 28 |
| 713 | 5 | 7 | 6 | 3 | 5 | 3   | 30 |
| 713 | 5 | 5 | 6 | 4 | 4 | 4   | 30 |
| 713 | 5 | 5 | 6 | 3 | 7 | 5   | 30 |
| 713 | 5 | 3 | 6 | 2 | 1 | 4   | 30 |
| 713 | 5 | 2 | 6 | 3 | 3 | 2   | 30 |
| 713 | 5 | 4 | 4 | 5 | 3 | 6   | 20 |
| 713 | 6 | 6 | 6 | 2 | 4 | 5.5 | 36 |
| 713 | 6 | 3 | 7 | 2 | 3 | 2.5 | 42 |
| 713 | 6 | 4 | 4 | 5 | 5 | 6   | 24 |
| 713 | 6 | 4 | 7 | 4 | 7 | 6   | 42 |
| 713 | 6 | 6 | 6 | 3 | 6 | 3   | 36 |
| 713 | 6 | 4 | 6 | 4 | 6 | 6   | 36 |

brand extension data

|     |   |   |   |   |   |     |    |
|-----|---|---|---|---|---|-----|----|
| 713 | 4 | 5 | 4 | 5 | 2 | 2.5 | 16 |
| 713 | 4 | 3 | 5 | 2 | 4 | 3.5 | 20 |
| 713 | 4 | 2 | 7 | 1 | 4 | 2   | 28 |
| 714 | 3 | 3 | 7 | 7 | 6 | 2.5 | 21 |
| 714 | 3 | 3 | 7 | 7 | 6 | 2.5 | 21 |
| 714 | 3 | 3 | 3 | 4 | 2 | 2.5 | 9  |
| 714 | 4 | 5 | 3 | 4 | 6 | 4   | 12 |
| 714 | 4 | 4 | 3 | 4 | 2 | 2.5 | 12 |
| 714 | 4 | 4 | 3 | 4 | 2 | 4   | 12 |
| 714 | 7 | 6 | 7 | 4 | 2 | 4   | 49 |
| 714 | 7 | 3 | 3 | 4 | 2 | 4   | 21 |
| 714 | 7 | 6 | 7 | 7 | 2 | 4   | 49 |
| 714 | 7 | 6 | 3 | 1 | 2 | 4   | 21 |
| 714 | 7 | 3 | 3 | 1 | 2 | 4   | 21 |
| 714 | 7 | 6 | 7 | 6 | 6 | 4   | 49 |
| 714 | 7 | 3 | 3 | 6 | 4 | 4   | 21 |
| 714 | 7 | 6 | 3 | 1 | 4 | 5.5 | 21 |
| 714 | 7 | 6 | 5 | 1 | 2 | 5.5 | 35 |
| 714 | 3 | 6 | 5 | 7 | 2 | 2.5 | 15 |
| 714 | 3 | 6 | 3 | 1 | 4 | 2.5 | 9  |
| 714 | 3 | 5 | 3 | 1 | 4 | 2.5 | 9  |
| 715 | 5 | 1 | 1 | 7 | 5 | 5   | 5  |
| 715 | 5 | 1 | 1 | 7 | 5 | 4   | 5  |
| 715 | 5 | 7 | 1 | 1 | 2 | 1.5 | 5  |
| 715 | 6 | 7 | 1 | 2 | 6 | 6   | 6  |
| 715 | 6 | 7 | 1 | 2 | 3 | 4   | 6  |
| 715 | 6 | 3 | 1 | 1 | 4 | 2.5 | 6  |
| 715 | 6 | 7 | 1 | 1 | 2 | 4.5 | 6  |
| 715 | 6 | 3 | 1 | 4 | 2 | 4.5 | 6  |
| 715 | 6 | 6 | 5 | 2 | 2 | 6   | 30 |
| 715 | 7 | 5 | 1 | 1 | 2 | 4.5 | 7  |
| 715 | 7 | 5 | 1 | 1 | 3 | 2   | 7  |
| 715 | 7 | 7 | 1 | 2 | 5 | 7   | 7  |
| 715 | 7 | 7 | 1 | 4 | 6 | 7   | 7  |
| 715 | 7 | 7 | 1 | 1 | 7 | 1   | 7  |
| 715 | 4 | 7 | 1 | 6 | 2 | 3.5 | 4  |
| 715 | 4 | 7 | 1 | 1 | 4 | 1.5 | 4  |
| 715 | 4 | 7 | 1 | 1 | 2 | 1.5 | 4  |
| 716 | 3 | 6 | 5 | 7 | 5 | 3.5 | 15 |
| 716 | 3 | 6 | 4 | 7 | 5 | 2.5 | 12 |
| 716 | 4 | 6 | 1 | 1 | 6 | 4   | 4  |
| 716 | 4 | 6 | 1 | 1 | 2 | 3.5 | 4  |
| 716 | 4 | 5 | 1 | 1 | 3 | 4   | 4  |
| 716 | 6 | 3 | 7 | 4 | 2 | 6   | 42 |
| 716 | 6 | 4 | 4 | 5 | 3 | 6   | 24 |
| 716 | 6 | 3 | 7 | 5 | 3 | 6.5 | 42 |
| 716 | 7 | 5 | 4 | 3 | 4 | 6   | 28 |
| 716 | 7 | 4 | 1 | 3 | 3 | 4   | 7  |
| 716 | 7 | 6 | 5 | 6 | 6 | 7   | 35 |
| 716 | 6 | 2 | 1 | 6 | 6 | 4.5 | 6  |
| 716 | 6 | 4 | 1 | 5 | 6 | 5.5 | 6  |

brand extension data

|     |   |   |   |   |   |     |    |
|-----|---|---|---|---|---|-----|----|
| 716 | 6 | 2 | 6 | 3 | 5 | 4.5 | 36 |
| 716 | 3 | 3 | 5 | 5 | 2 | 2   | 15 |
| 716 | 3 | 3 | 1 | 4 | 6 | 5   | 3  |
| 716 | 3 | 1 | 1 | 1 | 3 | 5.5 | 3  |
| 717 | 6 | 5 | 5 | 7 | 2 | 4   | 30 |
| 717 | 6 | 5 | 1 | 7 | 2 | 2   | 6  |
| 717 | 6 | 6 | 1 | 4 | 2 | 2.5 | 6  |
| 717 | 6 | 7 | 1 | 3 | 5 | 3   | 6  |
| 717 | 6 | 7 | 1 | 3 | 1 | 2   | 6  |
| 717 | 6 | 7 | 1 | 3 | 5 | 2.5 | 6  |
| 717 | 7 | 4 | 3 | 3 | 2 | 5   | 21 |
| 717 | 7 | 2 | 1 | 3 | 4 | 3   | 7  |
| 717 | 7 | 2 | 3 | 3 | 3 | 5.5 | 21 |
| 717 | 6 | 6 | 1 | 3 | 3 | 4   | 6  |
| 717 | 6 | 6 | 1 | 3 | 3 | 3.5 | 6  |
| 717 | 6 | 6 | 1 | 2 | 3 | 4   | 6  |
| 717 | 7 | 6 | 2 | 3 | 5 | 5   | 14 |
| 717 | 7 | 7 | 1 | 3 | 4 | 3.5 | 7  |
| 717 | 7 | 4 | 4 | 3 | 4 | 5.5 | 28 |
| 717 | 5 | 3 | 3 | 6 | 2 | 5.5 | 15 |
| 717 | 5 | 7 | 1 | 2 | 5 | 5   | 5  |
| 717 | 5 | 7 | 1 | 2 | 3 | 4.5 | 5  |
| 718 | 6 | 6 | 4 | 7 | 3 | 6   | 24 |
| 718 | 6 | 6 | 6 | 7 | 3 | 3   | 36 |
| 718 | 6 | 4 | 1 | 1 | 2 | 3.5 | 6  |
| 718 | 4 | 4 | 4 | 4 | 3 | 3.5 | 16 |
| 718 | 4 | 4 | 4 | 3 | 3 | 4   | 16 |
| 718 | 4 | 4 | 4 | 4 | 6 | 4   | 16 |
| 718 | 6 | 6 | 6 | 4 | 2 | 3   | 36 |
| 718 | 6 | 5 | 3 | 5 | 5 | 3.5 | 18 |
| 718 | 6 | 7 | 6 | 7 | 3 | 6   | 36 |
| 718 | 7 | 5 | 3 | 5 | 3 | 6.5 | 21 |
| 718 | 7 | 3 | 3 | 6 | 3 | 4   | 21 |
| 718 | 7 | 6 | 6 | 6 | 5 | 7   | 42 |
| 718 | 7 | 5 | 5 | 7 | 6 | 7   | 35 |
| 718 | 7 | 3 | 4 | 5 | 6 | 5.5 | 28 |
| 718 | 7 | 5 | 4 | 5 | 4 | 7   | 28 |
| 718 | 3 | 4 | 3 | 6 | 3 | 2.5 | 9  |
| 718 | 3 | 2 | 2 | 3 | 6 | 7   | 6  |
| 718 | 3 | 2 | 2 | 3 | 5 | 4.5 | 6  |
| 719 | 3 | 5 | 5 | 7 | 3 | 3   | 15 |
| 719 | 3 | 5 | 6 | 7 | 3 | 1   | 18 |
| 719 | 3 | 4 | 2 | 3 | 1 | 3.5 | 6  |
| 719 | 5 | 6 | 1 | 2 | 5 | 4   | 5  |
| 719 | 5 | 5 | 3 | 3 | 2 | 3   | 15 |
| 719 | 5 | 6 | 3 | 2 | 6 | 5.5 | 15 |
| 719 | 6 | 5 | 6 | 3 | 1 | 6   | 36 |
| 719 | 6 | 3 | 2 | 5 | 1 | 2.5 | 12 |
| 719 | 6 | 4 | 7 | 4 | 3 | 5   | 42 |
| 719 | 6 | 7 | 5 | 4 | 4 | 7   | 30 |
| 719 | 6 | 3 | 5 | 3 | 3 | 3.5 | 30 |

brand extension data

|     |   |   |   |   |   |     |    |
|-----|---|---|---|---|---|-----|----|
| 719 | 6 | 4 | 5 | 5 | 3 | 6.5 | 30 |
| 719 | 6 | 2 | 1 | 6 | 6 | 4   | 6  |
| 719 | 6 | 1 | 1 | 4 | 7 | 3   | 6  |
| 719 | 6 | 5 | 3 | 4 | 5 | 2   | 18 |
| 719 | 2 | 2 | 4 | 6 | 2 | 1   | 8  |
| 719 | 2 | 6 | 1 | 4 | 7 | 4.5 | 2  |
| 720 | 4 | 5 | 7 | 7 | 3 | 5.5 | 28 |
| 720 | 4 | 5 | 6 | 7 | 3 | 1   | 24 |
| 720 | 4 | 5 | 3 | 2 | 1 | 3   | 12 |
| 720 | 2 | 7 | 1 | 1 | 6 | 1   | 2  |
| 720 | 2 | 2 | 1 | 2 | 3 | 3.5 | 2  |
| 720 | 2 | 3 | 1 | 5 | 6 | 2.5 | 2  |
| 720 | 7 | 1 | 5 | 3 | 1 | 6   | 35 |
| 720 | 7 | 1 | 3 | 6 | 2 | 4   | 21 |
| 720 | 7 | 4 | 6 | 5 | 4 | 6   | 42 |
| 720 | 6 | 7 | 6 | 2 | 5 | 7   | 36 |
| 720 | 6 | 1 | 2 | 1 | 1 | 1.5 | 12 |
| 720 | 6 | 5 | 6 | 6 | 6 | 7   | 36 |
| 720 | 6 | 2 | 1 | 5 | 6 | 6   | 6  |
| 720 | 6 | 1 | 1 | 2 | 5 | 1   | 6  |
| 720 | 6 | 1 | 4 | 5 | 5 | 5.5 | 24 |
| 720 | 1 | 6 | 5 | 6 | 1 | 6   | 5  |
| 720 | 1 | 7 | 2 | 3 | 6 | 6   | 2  |
| 720 | 1 | 2 | 1 | 2 | 3 | 1   | 1  |
| 722 | 5 | 6 | 2 | 5 | 3 | 3.5 | 10 |
| 722 | 5 | 6 | 6 | 5 | 3 | 3   | 30 |
| 722 | 5 | 4 | 1 | 2 | 3 | 3   | 5  |
| 722 | 4 | 7 | 2 | 4 | 3 | 4   | 8  |
| 722 | 4 | 2 | 2 | 4 | 2 | 2   | 8  |
| 722 | 4 | 3 | 2 | 3 | 4 | 2.5 | 8  |
| 722 | 5 | 3 | 3 | 3 | 3 | 3   | 15 |
| 722 | 5 | 6 | 6 | 6 | 4 | 4.5 | 30 |
| 722 | 5 | 2 | 4 | 2 | 2 | 3   | 20 |
| 722 | 6 | 4 | 5 | 3 | 3 | 4   | 30 |
| 722 | 6 | 3 | 3 | 5 | 3 | 4.5 | 18 |
| 722 | 6 | 5 | 7 | 5 | 4 | 5.5 | 42 |
| 722 | 6 | 1 | 5 | 3 | 5 | 5.5 | 30 |
| 722 | 6 | 1 | 4 | 2 | 5 | 5   | 24 |
| 722 | 6 | 3 | 5 | 5 | 4 | 3.5 | 30 |
| 722 | 3 | 6 | 6 | 2 | 2 | 2   | 18 |
| 722 | 3 | 1 | 1 | 3 | 6 | 2.5 | 3  |
| 722 | 3 | 2 | 1 | 3 | 5 | 2   | 3  |
| 723 | 5 | 6 | 6 | 6 | 4 | 5.5 | 30 |
| 723 | 5 | 6 | 3 | 6 | 4 | 2   | 15 |
| 723 | 5 | 6 | 1 | 2 | 2 | 4   | 5  |
| 723 | 5 | 6 | 3 | 2 | 2 | 5   | 15 |
| 723 | 5 | 1 | 3 | 2 | 3 | 6   | 15 |
| 723 | 5 | 6 | 6 | 6 | 3 | 6   | 30 |
| 723 | 7 | 6 | 2 | 2 | 5 | 6.5 | 14 |
| 723 | 7 | 6 | 2 | 2 | 3 | 6.5 | 14 |
| 723 | 7 | 6 | 5 | 5 | 6 | 6.5 | 35 |

brand extension data

|     |   |   |   |   |   |     |    |
|-----|---|---|---|---|---|-----|----|
| 723 | 6 | 6 | 2 | 6 | 6 | 5.5 | 12 |
| 723 | 6 | 6 | 2 | 4 | 6 | 5.5 | 12 |
| 723 | 6 | 2 | 2 | 2 | 3 | 5.5 | 12 |
| 723 | 4 | 6 | 6 | 6 | 2 | 5.5 | 24 |
| 723 | 4 | 6 | 2 | 3 | 4 | 4.5 | 8  |
| 723 | 4 | 2 | 2 | 2 | 4 | 4   | 8  |
| 724 | 3 | 7 | 7 | 7 | 5 | 1.5 | 21 |
| 724 | 3 | 7 | 7 | 7 | 5 | 1   | 21 |
| 724 | 3 | 3 | 6 | 2 | 2 | 1   | 18 |
| 724 | 4 | 7 | 6 | 2 | 3 | 2.5 | 24 |
| 724 | 4 | 6 | 4 | 2 | 4 | 2.5 | 16 |
| 724 | 4 | 5 | 5 | 3 | 6 | 2.5 | 20 |
| 724 | 5 | 2 | 4 | 2 | 2 | 1.5 | 20 |
| 724 | 5 | 1 | 2 | 6 | 2 | 2.5 | 10 |
| 724 | 5 | 6 | 4 | 5 | 3 | 4.5 | 20 |
| 724 | 6 | 6 | 4 | 2 | 4 | 3   | 24 |
| 724 | 6 | 3 | 3 | 2 | 3 | 1.5 | 18 |
| 724 | 6 | 5 | 7 | 5 | 5 | 2.5 | 42 |
| 724 | 6 | 3 | 4 | 6 | 5 | 6   | 24 |
| 724 | 6 | 3 | 3 | 4 | 5 | 1   | 18 |
| 724 | 6 | 4 | 5 | 5 | 3 | 5.5 | 30 |
| 724 | 1 | 2 | 5 | 6 | 2 | 4   | 5  |
| 724 | 1 | 6 | 4 | 3 | 5 | 4   | 4  |
| 724 | 1 | 2 | 2 | 4 | 4 | 3   | 2  |
| 725 | 5 | 6 | 6 | 7 | 4 | 4   | 30 |
| 725 | 5 | 6 | 5 | 7 | 4 | 1   | 25 |
| 725 | 5 | 4 | 2 | 1 | 3 | 1.5 | 10 |
| 725 | 4 | 6 | 1 | 1 | 5 | 4.5 | 4  |
| 725 | 4 | 2 | 1 | 1 | 3 | 4   | 4  |
| 725 | 4 | 4 | 1 | 2 | 4 | 5   | 4  |
| 725 | 4 | 6 | 5 | 5 | 3 | 4   | 20 |
| 725 | 4 | 3 | 1 | 1 | 1 | 1.5 | 4  |
| 725 | 4 | 6 | 7 | 5 | 3 | 3   | 28 |
| 725 | 5 | 4 | 2 | 2 | 3 | 4   | 10 |
| 725 | 5 | 1 | 1 | 1 | 1 | 1.5 | 5  |
| 725 | 5 | 3 | 4 | 5 | 4 | 3.5 | 20 |
| 725 | 6 | 4 | 1 | 7 | 5 | 6   | 6  |
| 725 | 6 | 3 | 1 | 3 | 4 | 1.5 | 6  |
| 725 | 6 | 4 | 2 | 5 | 4 | 5   | 12 |
| 725 | 3 | 4 | 5 | 7 | 2 | 2.5 | 15 |
| 725 | 3 | 7 | 1 | 5 | 4 | 1.5 | 3  |
| 725 | 3 | 2 | 1 | 1 | 1 | 2   | 3  |
| 726 | 5 | 2 | 5 | 7 | 5 | 3.5 | 25 |
| 726 | 5 | 2 | 3 | 7 | 5 | 2.5 | 15 |
| 726 | 5 | 6 | 1 | 1 | 1 | 2.5 | 5  |
| 726 | 4 | 7 | 1 | 1 | 5 | 1   | 4  |
| 726 | 4 | 4 | 1 | 6 | 2 | 3   | 4  |
| 726 | 4 | 5 | 1 | 3 | 2 | 2.5 | 4  |
| 726 | 4 | 5 | 4 | 7 | 1 | 1   | 16 |
| 726 | 4 | 2 | 3 | 5 | 2 | 4.5 | 12 |
| 726 | 4 | 3 | 7 | 6 | 2 | 2.5 | 28 |

brand extension data

|     |   |   |   |   |   |     |    |
|-----|---|---|---|---|---|-----|----|
| 726 | 5 | 7 | 4 | 2 | 2 | 2.5 | 20 |
| 726 | 5 | 2 | 3 | 2 | 3 | 3.5 | 15 |
| 726 | 5 | 4 | 6 | 3 | 3 | 4.5 | 30 |
| 726 | 6 | 1 | 1 | 6 | 7 | 3.5 | 6  |
| 726 | 6 | 6 | 3 | 1 | 6 | 1   | 18 |
| 726 | 6 | 3 | 6 | 3 | 4 | 7   | 36 |
| 726 | 3 | 7 | 4 | 7 | 2 | 4   | 12 |
| 726 | 3 | 7 | 1 | 4 | 3 | 3   | 3  |
| 726 | 3 | 1 | 1 | 2 | 2 | 3   | 3  |
| 727 | 5 | 1 | 7 | 7 | 3 | 5   | 35 |
| 727 | 5 | 1 | 5 | 7 | 3 | 2.5 | 25 |
| 727 | 5 | 6 | 3 | 1 | 2 | 3   | 15 |
| 727 | 5 | 4 | 6 | 5 | 7 | 6   | 30 |
| 727 | 5 | 5 | 2 | 3 | 2 | 3.5 | 10 |
| 727 | 5 | 3 | 3 | 4 | 5 | 3   | 15 |
| 727 | 6 | 1 | 6 | 7 | 2 | 5   | 36 |
| 727 | 6 | 4 | 2 | 7 | 2 | 5   | 12 |
| 727 | 6 | 2 | 6 | 6 | 2 | 5.5 | 36 |
| 727 | 5 | 3 | 3 | 3 | 4 | 5   | 15 |
| 727 | 5 | 2 | 1 | 1 | 1 | 4   | 5  |
| 727 | 5 | 5 | 4 | 6 | 5 | 4.5 | 20 |
| 727 | 7 | 2 | 2 | 6 | 6 | 4.5 | 14 |
| 727 | 7 | 1 | 7 | 6 | 7 | 4.5 | 49 |
| 727 | 7 | 7 | 1 | 5 | 6 | 2.5 | 7  |
| 727 | 3 | 5 | 5 | 7 | 2 | 4   | 15 |
| 727 | 3 | 6 | 6 | 1 | 7 | 3.5 | 18 |
| 727 | 3 | 4 | 4 | 3 | 2 | 4   | 12 |
| 728 | 4 | 5 | 6 | 7 | 4 | 2.5 | 24 |
| 728 | 4 | 5 | 6 | 7 | 4 | 1   | 24 |
| 728 | 4 | 7 | 4 | 2 | 1 | 3   | 16 |
| 728 | 6 | 7 | 5 | 2 | 4 | 2.5 | 30 |
| 728 | 6 | 7 | 2 | 1 | 2 | 4   | 12 |
| 728 | 6 | 5 | 3 | 2 | 4 | 3.5 | 18 |
| 728 | 5 | 3 | 6 | 1 | 1 | 2.5 | 30 |
| 728 | 5 | 2 | 5 | 5 | 2 | 3.5 | 25 |
| 728 | 5 | 5 | 7 | 4 | 3 | 5   | 35 |
| 728 | 6 | 7 | 5 | 3 | 3 | 6   | 30 |
| 728 | 6 | 5 | 4 | 3 | 2 | 3   | 24 |
| 728 | 6 | 6 | 6 | 7 | 4 | 4.5 | 36 |
| 728 | 4 | 3 | 2 | 6 | 5 | 3   | 8  |
| 728 | 4 | 1 | 1 | 3 | 4 | 3   | 4  |
| 728 | 4 | 4 | 4 | 4 | 4 | 5   | 16 |
| 728 | 3 | 2 | 6 | 6 | 1 | 4.5 | 18 |
| 728 | 3 | 6 | 2 | 1 | 3 | 2   | 6  |
| 728 | 3 | 1 | 1 | 3 | 1 | 4   | 3  |
| 729 | 5 | 3 | 6 | 7 | 5 | 5.5 | 30 |
| 729 | 5 | 3 | 3 | 7 | 5 | 3.5 | 15 |
| 729 | 5 | 5 | 1 | 4 | 2 | 4   | 5  |
| 729 | 6 | 7 | 3 | 6 | 5 | 5   | 18 |
| 729 | 6 | 4 | 1 | 5 | 3 | 5   | 6  |
| 729 | 6 | 6 | 2 | 6 | 5 | 5.5 | 12 |

brand extension data

|     |   |   |   |   |   |     |    |
|-----|---|---|---|---|---|-----|----|
| 729 | 6 | 2 | 1 | 4 | 2 | 6   | 6  |
| 729 | 6 | 4 | 1 | 4 | 3 | 5.5 | 6  |
| 729 | 6 | 4 | 1 | 4 | 3 | 5   | 6  |
| 729 | 6 | 4 | 1 | 5 | 3 | 4.5 | 6  |
| 729 | 6 | 4 | 1 | 5 | 3 | 4.5 | 6  |
| 729 | 6 | 2 | 3 | 6 | 5 | 5.5 | 18 |
| 729 | 7 | 4 | 3 | 6 | 5 | 6.5 | 21 |
| 729 | 7 | 7 | 1 | 5 | 6 | 6   | 7  |
| 729 | 7 | 2 | 2 | 6 | 3 | 6   | 14 |
| 729 | 2 | 1 | 4 | 5 | 2 | 3   | 8  |
| 729 | 2 | 5 | 3 | 5 | 2 | 2   | 6  |
| 729 | 2 | 1 | 1 | 3 | 4 | 4.5 | 2  |
| 730 | 4 | 7 | 7 | 4 | 4 | 5   | 28 |
| 730 | 4 | 7 | 5 | 4 | 4 | 3   | 20 |
| 730 | 4 | 6 | 1 | 2 | 1 | 4   | 4  |
| 730 | 5 | 7 | 3 | 4 | 4 | 4.5 | 15 |
| 730 | 5 | 5 | 1 | 3 | 2 | 4.5 | 5  |
| 730 | 5 | 4 | 1 | 1 | 4 | 3   | 5  |
| 730 | 6 | 3 | 4 | 1 | 1 | 4.5 | 24 |
| 730 | 6 | 1 | 1 | 1 | 4 | 3.5 | 6  |
| 730 | 6 | 3 | 4 | 1 | 2 | 6   | 24 |
| 730 | 6 | 6 | 4 | 2 | 4 | 7   | 24 |
| 730 | 6 | 4 | 2 | 1 | 2 | 4   | 12 |
| 730 | 6 | 6 | 6 | 4 | 4 | 6   | 36 |
| 730 | 7 | 5 | 5 | 5 | 4 | 5.5 | 35 |
| 730 | 7 | 3 | 1 | 2 | 4 | 2.5 | 7  |
| 730 | 7 | 5 | 4 | 2 | 3 | 3.5 | 28 |
| 730 | 3 | 4 | 4 | 1 | 2 | 3.5 | 12 |
| 730 | 3 | 7 | 5 | 2 | 6 | 7   | 15 |
| 730 | 3 | 4 | 4 | 2 | 3 | 4   | 12 |
| 731 | 5 | 6 | 6 | 7 | 4 | 5   | 30 |
| 731 | 5 | 6 | 2 | 7 | 4 | 2.5 | 10 |
| 731 | 5 | 5 | 2 | 2 | 2 | 2.5 | 10 |
| 731 | 6 | 6 | 4 | 2 | 6 | 3   | 24 |
| 731 | 6 | 2 | 2 | 2 | 3 | 3   | 12 |
| 731 | 6 | 3 | 2 | 3 | 5 | 4   | 12 |
| 731 | 7 | 6 | 6 | 2 | 2 | 5.5 | 42 |
| 731 | 7 | 5 | 6 | 5 | 2 | 5.5 | 42 |
| 731 | 7 | 5 | 6 | 5 | 2 | 6   | 42 |
| 731 | 7 | 6 | 6 | 2 | 3 | 6   | 42 |
| 731 | 7 | 2 | 2 | 2 | 2 | 5   | 14 |
| 731 | 7 | 6 | 5 | 7 | 6 | 6.5 | 35 |
| 731 | 5 | 2 | 2 | 6 | 6 | 4.5 | 10 |
| 731 | 5 | 6 | 3 | 5 | 7 | 3.5 | 15 |
| 731 | 5 | 3 | 5 | 3 | 6 | 6   | 25 |
| 731 | 3 | 2 | 6 | 5 | 3 | 5   | 18 |
| 731 | 3 | 6 | 3 | 2 | 3 | 4.5 | 9  |
| 731 | 3 | 2 | 2 | 6 | 3 | 6.5 | 6  |
| 732 | 5 | 2 | 6 | 7 | 4 | 5.5 | 30 |
| 732 | 5 | 2 | 2 | 7 | 4 | 1.5 | 10 |
| 732 | 5 | 6 | 1 | 2 | 3 | 4   | 5  |

brand extension data

|     |   |   |   |   |   |     |    |
|-----|---|---|---|---|---|-----|----|
| 732 | 6 | 6 | 1 | 1 | 4 | 2.5 | 6  |
| 732 | 6 | 4 | 1 | 1 | 1 | 3   | 6  |
| 732 | 6 | 6 | 1 | 1 | 5 | 2   | 6  |
| 732 | 7 | 3 | 3 | 5 | 3 | 5   | 21 |
| 732 | 7 | 1 | 2 | 6 | 3 | 5   | 14 |
| 732 | 7 | 4 | 5 | 6 | 3 | 6   | 35 |
| 732 | 7 | 6 | 1 | 2 | 4 | 5   | 7  |
| 732 | 7 | 2 | 1 | 1 | 3 | 5   | 7  |
| 732 | 7 | 3 | 5 | 4 | 3 | 6   | 35 |
| 732 | 7 | 1 | 1 | 5 | 5 | 6.5 | 7  |
| 732 | 7 | 5 | 1 | 3 | 5 | 4   | 7  |
| 732 | 7 | 1 | 2 | 3 | 3 | 3.5 | 14 |
| 732 | 5 | 2 | 4 | 2 | 2 | 2   | 20 |
| 732 | 5 | 6 | 1 | 1 | 6 | 4.5 | 5  |
| 732 | 5 | 1 | 1 | 1 | 2 | 3.5 | 5  |
| 733 | 5 | 3 | 6 | 7 | 5 | 3.5 | 30 |
| 733 | 5 | 3 | 4 | 7 | 5 | 2   | 20 |
| 733 | 5 | 3 | 1 | 1 | 2 | 2.5 | 5  |
| 733 | 7 | 1 | 4 | 1 | 2 | 2.5 | 28 |
| 733 | 7 | 2 | 2 | 1 | 2 | 5.5 | 14 |
| 733 | 7 | 6 | 7 | 1 | 2 | 7   | 49 |
| 733 | 7 | 7 | 3 | 1 | 3 | 7   | 21 |
| 733 | 7 | 2 | 1 | 1 | 2 | 6.5 | 7  |
| 733 | 7 | 4 | 3 | 6 | 5 | 7   | 21 |
| 733 | 7 | 1 | 1 | 5 | 5 | 6   | 7  |
| 733 | 7 | 5 | 3 | 4 | 6 | 7   | 21 |
| 733 | 7 | 4 | 3 | 1 | 5 | 7   | 21 |
| 733 | 5 | 3 | 5 | 4 | 3 | 1.5 | 25 |
| 733 | 5 | 6 | 2 | 2 | 7 | 7   | 10 |
| 733 | 5 | 1 | 1 | 3 | 6 | 5   | 5  |
| 734 | 1 | 1 | 1 | 6 | 2 | 3.5 | 1  |
| 734 | 1 | 1 | 6 | 6 | 2 | 1   | 6  |
| 734 | 1 | 1 | 1 | 1 | 1 | 1   | 1  |
| 734 | 6 | 7 | 1 | 5 | 5 | 4   | 6  |
| 734 | 6 | 6 | 1 | 1 | 1 | 1   | 6  |
| 734 | 6 | 6 | 1 | 3 | 3 | 3.5 | 6  |
| 734 | 6 | 1 | 6 | 1 | 1 | 1   | 36 |
| 734 | 6 | 1 | 2 | 1 | 1 | 4   | 12 |
| 734 | 6 | 1 | 1 | 5 | 2 | 4.5 | 6  |
| 734 | 7 | 7 | 1 | 7 | 3 | 6   | 7  |
| 734 | 7 | 1 | 1 | 1 | 1 | 1   | 7  |
| 734 | 7 | 1 | 1 | 5 | 5 | 6   | 7  |
| 734 | 7 | 1 | 1 | 4 | 6 | 6   | 7  |
| 734 | 7 | 7 | 1 | 4 | 6 | 2.5 | 7  |
| 734 | 7 | 1 | 1 | 1 | 3 | 1   | 7  |
| 734 | 1 | 4 | 1 | 6 | 1 | 3.5 | 1  |
| 734 | 1 | 1 | 1 | 5 | 1 | 1.5 | 1  |
| 734 | 1 | 1 | 1 | 2 | 4 | 1   | 1  |
| 735 | 5 | 1 | 7 | 7 | 4 | 6   | 35 |
| 735 | 5 | 1 | 5 | 7 | 4 | 2   | 25 |
| 735 | 5 | 7 | 1 | 1 | 1 | 2   | 5  |

brand extension data

|     |   |   |   |   |   |     |    |
|-----|---|---|---|---|---|-----|----|
| 735 | 5 | 7 | 1 | 1 | 1 | 3   | 5  |
| 735 | 5 | 5 | 4 | 1 | 1 | 1   | 20 |
| 735 | 5 | 7 | 1 | 1 | 1 | 3   | 5  |
| 735 | 6 | 7 | 1 | 3 | 1 | 4.5 | 6  |
| 735 | 6 | 7 | 1 | 1 | 1 | 1   | 6  |
| 735 | 6 | 3 | 5 | 7 | 4 | 7   | 30 |
| 735 | 6 | 5 | 1 | 5 | 2 | 5.5 | 6  |
| 735 | 6 | 7 | 1 | 1 | 2 | 3.5 | 6  |
| 735 | 6 | 5 | 3 | 1 | 2 | 5   | 18 |
| 735 | 1 | 7 | 1 | 7 | 1 | 1   | 1  |
| 735 | 1 | 7 | 1 | 1 | 5 | 4   | 1  |
| 735 | 1 | 7 | 1 | 3 | 2 | 5   | 1  |
| 736 | 5 | 7 | 5 | 7 | 5 | 5.5 | 25 |
| 736 | 5 | 7 | 4 | 7 | 5 | 3   | 20 |
| 736 | 5 | 7 | 3 | 2 | 2 | 3   | 15 |
| 736 | 6 | 7 | 1 | 2 | 6 | 6   | 6  |
| 736 | 6 | 4 | 1 | 2 | 4 | 6   | 6  |
| 736 | 6 | 2 | 1 | 1 | 5 | 5   | 6  |
| 736 | 7 | 7 | 5 | 1 | 2 | 4   | 35 |
| 736 | 7 | 2 | 1 | 2 | 2 | 6   | 7  |
| 736 | 7 | 7 | 6 | 3 | 3 | 7   | 42 |
| 736 | 5 | 7 | 3 | 3 | 6 | 7   | 15 |
| 736 | 5 | 5 | 1 | 2 | 4 | 5.5 | 5  |
| 736 | 5 | 7 | 5 | 6 | 6 | 6.5 | 25 |
| 736 | 7 | 5 | 1 | 6 | 6 | 7   | 7  |
| 736 | 7 | 4 | 1 | 4 | 6 | 6   | 7  |
| 736 | 7 | 3 | 4 | 2 | 4 | 4.5 | 28 |
| 736 | 5 | 6 | 7 | 7 | 1 | 6   | 35 |
| 736 | 5 | 5 | 1 | 2 | 6 | 5   | 5  |
| 736 | 5 | 1 | 1 | 1 | 4 | 2   | 5  |
| 737 | 5 | 1 | 2 | 6 | 1 | 1.5 | 10 |
| 737 | 5 | 4 | 1 | 6 | 5 | 3.5 | 5  |
| 737 | 5 | 1 | 2 | 6 | 7 | 2.5 | 10 |
| 737 | 6 | 1 | 1 | 6 | 6 | 3.5 | 6  |
| 737 | 6 | 1 | 6 | 6 | 6 | 5.5 | 36 |
| 737 | 6 | 4 | 1 | 2 | 7 | 5.5 | 6  |
| 737 | 7 | 1 | 1 | 3 | 5 | 4.5 | 7  |
| 737 | 7 | 1 | 5 | 4 | 6 | 5   | 35 |
| 737 | 7 | 1 | 1 | 7 | 2 | 4   | 7  |
| 738 | 3 | 3 | 3 | 5 | 4 | 3.5 | 9  |
| 738 | 3 | 3 | 5 | 4 | 5 | 3.5 | 15 |
| 738 | 3 | 3 | 4 | 3 | 5 | 2.5 | 12 |
| 738 | 4 | 3 | 3 | 3 | 5 | 3.5 | 12 |
| 738 | 4 | 3 | 4 | 4 | 5 | 3.5 | 16 |
| 738 | 4 | 3 | 3 | 3 | 3 | 4   | 12 |
| 738 | 5 | 3 | 5 | 3 | 4 | 3   | 25 |
| 738 | 5 | 3 | 5 | 3 | 3 | 4.5 | 25 |
| 738 | 5 | 3 | 5 | 4 | 4 | 3.5 | 25 |
| 739 | 3 | 3 | 3 | 5 | 2 | 1.5 | 9  |
| 739 | 3 | 2 | 1 | 4 | 3 | 1.5 | 3  |
| 739 | 3 | 1 | 1 | 1 | 6 | 1   | 3  |

brand extension data

|     |   |   |   |   |   |     |    |
|-----|---|---|---|---|---|-----|----|
| 739 | 6 | 2 | 1 | 4 | 6 | 2.5 | 6  |
| 739 | 6 | 3 | 3 | 6 | 3 | 4   | 18 |
| 739 | 6 | 1 | 1 | 1 | 7 | 1   | 6  |
| 739 | 2 | 1 | 1 | 1 | 5 | 1   | 2  |
| 739 | 2 | 1 | 1 | 3 | 5 | 1.5 | 2  |
| 739 | 2 | 1 | 1 | 6 | 4 | 1.5 | 2  |
| 740 | 3 | 2 | 3 | 5 | 2 | 4   | 9  |
| 740 | 3 | 2 | 2 | 4 | 4 | 3.5 | 6  |
| 740 | 3 | 2 | 1 | 1 | 4 | 4   | 3  |
| 740 | 6 | 2 | 4 | 4 | 4 | 5   | 24 |
| 740 | 6 | 4 | 2 | 7 | 4 | 5   | 12 |
| 740 | 6 | 4 | 2 | 2 | 1 | 4.5 | 12 |
| 740 | 6 | 2 | 5 | 5 | 4 | 5   | 30 |
| 740 | 6 | 3 | 4 | 4 | 4 | 5.5 | 24 |
| 740 | 6 | 4 | 2 | 5 | 4 | 4.5 | 12 |
| 741 | 2 | 1 | 1 | 5 | 3 | 3.5 | 2  |
| 741 | 2 | 5 | 1 | 2 | 5 | 5   | 2  |
| 741 | 2 | 3 | 1 | 1 | 5 | 4   | 2  |
| 741 | 6 | 2 | 4 | 4 | 4 | 3   | 24 |
| 741 | 6 | 2 | 4 | 4 | 4 | 3   | 24 |
| 741 | 6 | 6 | 2 | 1 | 3 | 2   | 12 |
| 741 | 4 | 1 | 6 | 5 | 5 | 4.5 | 24 |
| 741 | 4 | 5 | 3 | 3 | 5 | 3.5 | 12 |
| 741 | 4 | 5 | 1 | 2 | 5 | 4.5 | 4  |
| 742 | 4 | 1 | 1 | 5 | 1 | 3   | 4  |
| 742 | 4 | 1 | 1 | 1 | 2 | 2.5 | 4  |
| 742 | 4 | 1 | 1 | 1 | 6 | 2.5 | 4  |
| 742 | 5 | 1 | 1 | 2 | 6 | 2   | 5  |
| 742 | 5 | 1 | 1 | 5 | 6 | 5   | 5  |
| 742 | 5 | 1 | 1 | 1 | 2 | 2   | 5  |
| 742 | 4 | 1 | 1 | 1 | 6 | 2   | 4  |
| 742 | 4 | 1 | 1 | 1 | 3 | 3.5 | 4  |
| 742 | 4 | 1 | 2 | 1 | 3 | 3   | 8  |
| 743 | 2 | 1 | 1 | 7 | 1 | 1   | 2  |
| 743 | 2 | 7 | 1 | 6 | 5 | 2   | 2  |
| 743 | 2 | 4 | 1 | 2 | 4 | 1.5 | 2  |
| 743 | 5 | 1 | 7 | 2 | 7 | 5.5 | 35 |
| 743 | 5 | 1 | 5 | 6 | 6 | 5   | 25 |
| 743 | 5 | 7 | 1 | 1 | 1 | 5   | 5  |
| 743 | 7 | 1 | 7 | 5 | 3 | 6   | 49 |
| 743 | 7 | 7 | 3 | 2 | 6 | 5.5 | 21 |
| 743 | 7 | 7 | 6 | 7 | 6 | 7   | 42 |
| 744 | 6 | 1 | 1 | 4 | 2 | 1.5 | 6  |
| 744 | 6 | 1 | 1 | 1 | 6 | 1.5 | 6  |
| 744 | 6 | 1 | 1 | 1 | 4 | 1.5 | 6  |
| 744 | 6 | 1 | 2 | 2 | 4 | 1.5 | 12 |
| 744 | 6 | 4 | 5 | 6 | 4 | 1.5 | 30 |
| 744 | 6 | 3 | 1 | 1 | 2 | 1.5 | 6  |
| 744 | 6 | 5 | 5 | 3 | 4 | 1.5 | 30 |
| 744 | 6 | 1 | 5 | 3 | 5 | 1.5 | 30 |
| 744 | 6 | 1 | 1 | 1 | 6 | 1.5 | 6  |

brand extension data

|     |   |   |   |   |   |     |    |
|-----|---|---|---|---|---|-----|----|
| 745 | 3 | 7 | 4 | 6 | 4 | 4   | 12 |
| 745 | 3 | 1 | 1 | 3 | 5 | 2.5 | 3  |
| 745 | 3 | 1 | 1 | 1 | 3 | 1   | 3  |
| 745 | 7 | 1 | 1 | 4 | 7 | 2.5 | 7  |
| 745 | 7 | 1 | 1 | 5 | 5 | 2   | 7  |
| 745 | 7 | 1 | 1 | 1 | 1 | 1   | 7  |
| 745 | 6 | 1 | 4 | 3 | 4 | 4.5 | 24 |
| 745 | 6 | 3 | 1 | 1 | 3 | 1.5 | 6  |
| 745 | 6 | 4 | 1 | 1 | 6 | 2   | 6  |
| 746 | 4 | 1 | 3 | 5 | 3 | 3.5 | 12 |
| 746 | 4 | 4 | 2 | 4 | 4 | 5   | 8  |
| 746 | 4 | 1 | 1 | 1 | 7 | 1   | 4  |
| 746 | 6 | 5 | 4 | 4 | 5 | 3.5 | 24 |
| 746 | 6 | 5 | 5 | 6 | 5 | 4   | 30 |
| 746 | 6 | 2 | 1 | 1 | 3 | 1   | 6  |
| 746 | 6 | 4 | 5 | 5 | 5 | 5   | 30 |
| 746 | 6 | 6 | 5 | 4 | 6 | 5   | 30 |
| 746 | 6 | 6 | 4 | 3 | 6 | 5   | 24 |
| 747 | 2 | 5 | 1 | 7 | 1 | 1   | 2  |
| 747 | 2 | 6 | 1 | 7 | 2 | 6   | 2  |
| 747 | 2 | 1 | 1 | 1 | 6 | 1   | 2  |
| 747 | 7 | 4 | 3 | 4 | 5 | 6   | 21 |
| 747 | 7 | 4 | 7 | 7 | 5 | 6   | 49 |
| 747 | 7 | 7 | 4 | 3 | 3 | 2   | 28 |
| 747 | 6 | 1 | 6 | 5 | 5 | 6   | 36 |
| 747 | 6 | 6 | 6 | 1 | 3 | 5   | 36 |
| 747 | 6 | 7 | 5 | 5 | 2 | 5   | 30 |
| 748 | 4 | 4 | 1 | 6 | 2 | 3   | 4  |
| 748 | 4 | 5 | 1 | 2 | 6 | 3   | 4  |
| 748 | 4 | 4 | 1 | 1 | 7 | 3.5 | 4  |
| 748 | 6 | 1 | 1 | 4 | 6 | 3   | 6  |
| 748 | 6 | 1 | 1 | 7 | 6 | 2.5 | 6  |
| 748 | 6 | 4 | 1 | 1 | 4 | 4   | 6  |
| 748 | 5 | 1 | 5 | 5 | 5 | 3.5 | 25 |
| 748 | 5 | 4 | 1 | 1 | 5 | 3.5 | 5  |
| 748 | 5 | 7 | 1 | 1 | 6 | 4   | 5  |
| 749 | 6 | 1 | 1 | 2 | 3 | 3   | 6  |
| 749 | 6 | 1 | 1 | 3 | 6 | 1.5 | 6  |
| 749 | 6 | 1 | 1 | 1 | 4 | 1   | 6  |
| 749 | 6 | 1 | 1 | 1 | 4 | 1   | 6  |
| 749 | 6 | 1 | 7 | 6 | 5 | 6   | 42 |
| 749 | 6 | 3 | 1 | 1 | 3 | 2.5 | 6  |
| 749 | 6 | 1 | 3 | 2 | 6 | 2   | 18 |
| 749 | 6 | 5 | 3 | 3 | 6 | 4.5 | 18 |
| 749 | 6 | 5 | 1 | 3 | 5 | 4   | 6  |
| 750 | 5 | 6 | 3 | 6 | 4 | 4   | 15 |
| 750 | 5 | 6 | 1 | 6 | 7 | 4.5 | 5  |
| 750 | 5 | 6 | 1 | 2 | 5 | 2.5 | 5  |
| 750 | 7 | 2 | 1 | 2 | 6 | 2   | 7  |
| 750 | 7 | 4 | 5 | 7 | 6 | 6   | 35 |
| 750 | 7 | 6 | 3 | 1 | 1 | 3   | 21 |

brand extension data

|     |   |   |   |   |   |     |    |
|-----|---|---|---|---|---|-----|----|
| 750 | 7 | 3 | 2 | 3 | 6 | 4.5 | 14 |
| 750 | 7 | 5 | 2 | 4 | 5 | 4   | 14 |
| 750 | 7 | 7 | 2 | 5 | 3 | 6.5 | 14 |
| 751 | 5 | 2 | 1 | 2 | 4 | 5   | 5  |
| 751 | 5 | 1 | 1 | 5 | 4 | 3.5 | 5  |
| 751 | 5 | 1 | 1 | 4 | 5 | 4   | 5  |
| 751 | 6 | 3 | 5 | 3 | 4 | 6   | 30 |
| 751 | 6 | 6 | 6 | 7 | 4 | 6   | 36 |
| 751 | 6 | 5 | 4 | 5 | 5 | 5   | 24 |
| 751 | 6 | 4 | 1 | 3 | 5 | 5   | 6  |
| 751 | 6 | 3 | 2 | 3 | 5 | 4.5 | 12 |
| 751 | 6 | 4 | 3 | 4 | 5 | 4.5 | 18 |
| 752 | 3 | 1 | 4 | 6 | 3 | 2   | 12 |
| 752 | 3 | 1 | 1 | 6 | 4 | 3.5 | 3  |
| 752 | 3 | 1 | 1 | 4 | 5 | 1.5 | 3  |
| 752 | 6 | 5 | 4 | 7 | 6 | 4   | 24 |
| 752 | 6 | 3 | 4 | 7 | 7 | 6   | 24 |
| 752 | 6 | 5 | 1 | 4 | 2 | 5.5 | 6  |
| 752 | 6 | 4 | 5 | 6 | 5 | 6.5 | 30 |
| 752 | 6 | 7 | 3 | 6 | 5 | 6.5 | 18 |
| 752 | 6 | 7 | 1 | 6 | 5 | 5   | 6  |
| 753 | 5 | 3 | 1 | 5 | 3 | 5   | 5  |
| 753 | 5 | 7 | 1 | 5 | 3 | 6   | 5  |
| 753 | 5 | 1 | 1 | 1 | 6 | 2   | 5  |
| 753 | 7 | 4 | 5 | 3 | 6 | 4.5 | 35 |
| 753 | 7 | 7 | 6 | 6 | 5 | 6   | 42 |
| 753 | 7 | 1 | 1 | 1 | 1 | 2.5 | 7  |
| 753 | 7 | 6 | 1 | 6 | 6 | 6.5 | 7  |
| 753 | 7 | 5 | 4 | 5 | 5 | 5.5 | 28 |
| 753 | 7 | 1 | 6 | 1 | 3 | 1   | 42 |
| 754 | 2 | 5 | 1 | 5 | 2 | 5.5 | 2  |
| 754 | 2 | 5 | 1 | 5 | 4 | 3   | 2  |
| 754 | 2 | 5 | 1 | 1 | 4 | 2   | 2  |
| 754 | 4 | 1 | 1 | 6 | 5 | 3   | 4  |
| 754 | 4 | 1 | 1 | 6 | 5 | 2   | 4  |
| 754 | 4 | 5 | 1 | 1 | 2 | 3.5 | 4  |
| 754 | 7 | 4 | 5 | 4 | 4 | 3   | 35 |
| 754 | 7 | 6 | 7 | 4 | 4 | 6   | 49 |
| 754 | 7 | 4 | 7 | 4 | 4 | 4.5 | 49 |
| 755 | 4 | 7 | 6 | 3 | 5 | 6.5 | 24 |
| 755 | 4 | 3 | 1 | 6 | 4 | 2.5 | 4  |
| 755 | 4 | 1 | 1 | 6 | 1 | 4   | 4  |
| 755 | 6 | 1 | 3 | 3 | 3 | 3   | 18 |
| 755 | 6 | 5 | 6 | 6 | 6 | 4.5 | 36 |
| 755 | 6 | 7 | 1 | 2 | 1 | 4.5 | 6  |
| 755 | 5 | 1 | 3 | 3 | 5 | 2   | 15 |
| 755 | 5 | 5 | 4 | 3 | 3 | 3   | 20 |
| 755 | 5 | 7 | 2 | 4 | 5 | 4   | 10 |
| 756 | 4 | 1 | 4 | 3 | 4 | 3.5 | 16 |
| 756 | 4 | 1 | 1 | 1 | 7 | 6   | 4  |
| 756 | 4 | 1 | 1 | 1 | 7 | 1   | 4  |

brand extension data

|     |   |   |   |   |   |     |    |
|-----|---|---|---|---|---|-----|----|
| 756 | 7 | 6 | 7 | 2 | 6 | 6   | 49 |
| 756 | 7 | 6 | 7 | 7 | 4 | 5.5 | 49 |
| 756 | 7 | 4 | 1 | 1 | 1 | 4   | 7  |
| 756 | 7 | 5 | 2 | 3 | 3 | 5   | 14 |
| 756 | 7 | 4 | 1 | 1 | 3 | 6   | 7  |
| 756 | 7 | 7 | 1 | 5 | 3 | 6   | 7  |
| 757 | 4 | 1 | 2 | 6 | 3 | 3   | 8  |
| 757 | 4 | 2 | 1 | 4 | 4 | 2.5 | 4  |
| 757 | 4 | 1 | 3 | 1 | 6 | 3.5 | 12 |
| 757 | 5 | 1 | 1 | 3 | 6 | 3.5 | 5  |
| 757 | 5 | 4 | 2 | 6 | 6 | 4   | 10 |
| 757 | 5 | 4 | 1 | 1 | 1 | 4   | 5  |
| 757 | 7 | 3 | 1 | 3 | 6 | 3.5 | 7  |
| 757 | 7 | 3 | 1 | 3 | 6 | 4.5 | 7  |
| 757 | 7 | 3 | 1 | 5 | 4 | 4.5 | 7  |
| 758 | 5 | 5 | 5 | 6 | 1 | 6.5 | 25 |
| 758 | 5 | 1 | 1 | 2 | 2 | 1   | 5  |
| 758 | 5 | 1 | 1 | 1 | 6 | 2   | 5  |
| 758 | 6 | 2 | 1 | 2 | 3 | 2.5 | 6  |
| 758 | 6 | 4 | 1 | 5 | 2 | 2   | 6  |
| 758 | 6 | 1 | 1 | 1 | 1 | 1   | 6  |
| 758 | 7 | 6 | 5 | 5 | 1 | 5   | 35 |
| 758 | 7 | 4 | 1 | 2 | 2 | 5   | 7  |
| 758 | 7 | 1 | 1 | 3 | 2 | 3.5 | 7  |
| 759 | 4 | 6 | 6 | 6 | 3 | 5   | 24 |
| 759 | 4 | 6 | 2 | 4 | 4 | 5   | 8  |
| 759 | 4 | 2 | 2 | 1 | 5 | 2.5 | 8  |
| 759 | 4 | 6 | 6 | 3 | 5 | 3   | 24 |
| 759 | 4 | 5 | 7 | 6 | 3 | 4.5 | 28 |
| 759 | 4 | 4 | 2 | 2 | 6 | 2.5 | 8  |
| 759 | 6 | 5 | 7 | 3 | 4 | 5.5 | 42 |
| 759 | 6 | 4 | 4 | 3 | 4 | 4.5 | 24 |
| 759 | 6 | 7 | 2 | 5 | 4 | 6   | 12 |
| 760 | 5 | 1 | 2 | 4 | 3 | 2.5 | 10 |
| 760 | 5 | 1 | 2 | 4 | 4 | 3   | 10 |
| 760 | 5 | 1 | 2 | 6 | 5 | 3   | 10 |
| 760 | 4 | 1 | 1 | 6 | 6 | 2.5 | 4  |
| 760 | 4 | 1 | 1 | 5 | 4 | 3.5 | 4  |
| 760 | 4 | 1 | 1 | 4 | 3 | 2.5 | 4  |
| 760 | 5 | 1 | 5 | 6 | 5 | 5   | 25 |
| 760 | 5 | 1 | 5 | 6 | 5 | 5   | 25 |
| 760 | 5 | 7 | 2 | 4 | 3 | 3.5 | 10 |
| 761 | 7 | 1 | 1 | 4 | 2 | 2.5 | 7  |
| 761 | 7 | 4 | 1 | 2 | 6 | 4.5 | 7  |
| 761 | 7 | 1 | 1 | 1 | 7 | 2   | 7  |
| 761 | 7 | 1 | 1 | 4 | 7 | 4   | 7  |
| 761 | 7 | 1 | 1 | 6 | 6 | 4   | 7  |
| 761 | 7 | 2 | 1 | 1 | 2 | 2.5 | 7  |
| 761 | 7 | 1 | 1 | 4 | 6 | 5.5 | 7  |
| 761 | 7 | 6 | 6 | 3 | 6 | 5.5 | 42 |
| 761 | 7 | 3 | 1 | 1 | 6 | 1   | 7  |

brand extension data

|     |   |   |   |   |   |     |    |
|-----|---|---|---|---|---|-----|----|
| 762 | 4 | 2 | 4 | 5 | 3 | 2   | 16 |
| 762 | 4 | 7 | 2 | 6 | 6 | 3.5 | 8  |
| 762 | 4 | 5 | 2 | 6 | 7 | 2   | 8  |
| 762 | 7 | 3 | 3 | 6 | 7 | 4.5 | 21 |
| 762 | 7 | 4 | 2 | 7 | 6 | 2   | 14 |
| 762 | 7 | 7 | 1 | 4 | 3 | 3   | 7  |
| 762 | 6 | 3 | 5 | 5 | 5 | 5   | 30 |
| 762 | 6 | 6 | 2 | 6 | 4 | 4   | 12 |
| 762 | 6 | 7 | 2 | 6 | 2 | 5   | 12 |
| 763 | 2 | 1 | 5 | 5 | 2 | 3   | 10 |
| 763 | 2 | 1 | 1 | 3 | 6 | 5.5 | 2  |
| 763 | 2 | 1 | 1 | 1 | 6 | 1.5 | 2  |
| 763 | 6 | 1 | 4 | 1 | 5 | 2   | 24 |
| 763 | 6 | 1 | 5 | 6 | 4 | 6   | 30 |
| 763 | 6 | 5 | 2 | 1 | 2 | 4   | 12 |
| 763 | 6 | 1 | 6 | 3 | 5 | 6   | 36 |
| 763 | 6 | 1 | 5 | 3 | 5 | 5   | 30 |
| 763 | 6 | 6 | 2 | 2 | 4 | 4.5 | 12 |
| 764 | 2 | 1 | 2 | 3 | 3 | 3   | 4  |
| 764 | 2 | 1 | 1 | 5 | 7 | 4   | 2  |
| 764 | 2 | 1 | 1 | 1 | 6 | 4   | 2  |
| 764 | 6 | 1 | 1 | 2 | 5 | 3.5 | 6  |
| 764 | 6 | 1 | 1 | 7 | 5 | 4   | 6  |
| 764 | 6 | 1 | 1 | 1 | 1 | 3.5 | 6  |
| 764 | 5 | 1 | 4 | 1 | 3 | 4   | 20 |
| 764 | 5 | 1 | 1 | 1 | 3 | 4   | 5  |
| 764 | 5 | 1 | 1 | 1 | 4 | 4.5 | 5  |
| 765 | 4 | 2 | 5 | 6 | 3 | 5   | 20 |
| 765 | 4 | 6 | 2 | 5 | 4 | 4.5 | 8  |
| 765 | 4 | 2 | 2 | 1 | 5 | 1.5 | 8  |
| 765 | 6 | 2 | 2 | 2 | 5 | 1.5 | 12 |
| 765 | 6 | 5 | 6 | 6 | 5 | 5   | 36 |
| 765 | 6 | 4 | 1 | 1 | 3 | 1.5 | 6  |
| 765 | 6 | 2 | 2 | 2 | 5 | 3   | 12 |
| 765 | 6 | 5 | 1 | 2 | 5 | 4   | 6  |
| 765 | 6 | 6 | 1 | 4 | 4 | 5.5 | 6  |
| 766 | 2 | 3 | 5 | 6 | 3 | 4.5 | 10 |
| 766 | 2 | 6 | 1 | 7 | 7 | 2.5 | 2  |
| 766 | 2 | 1 | 1 | 2 | 7 | 1   | 2  |
| 766 | 5 | 1 | 1 | 3 | 7 | 2.5 | 5  |
| 766 | 5 | 5 | 5 | 7 | 5 | 3   | 25 |
| 766 | 5 | 3 | 1 | 3 | 3 | 2   | 5  |
| 766 | 6 | 1 | 1 | 5 | 6 | 3.5 | 6  |
| 766 | 6 | 1 | 1 | 1 | 6 | 1.5 | 6  |
| 766 | 6 | 6 | 1 | 1 | 6 | 6   | 6  |
| 767 | 4 | 6 | 6 | 5 | 2 | 2.5 | 24 |
| 767 | 4 | 5 | 1 | 3 | 5 | 3   | 4  |
| 767 | 4 | 1 | 1 | 2 | 7 | 3   | 4  |
| 767 | 5 | 1 | 4 | 5 | 4 | 3.5 | 20 |
| 767 | 5 | 1 | 7 | 7 | 2 | 4.5 | 35 |
| 767 | 5 | 1 | 1 | 1 | 7 | 3   | 5  |

brand extension data

|     |   |   |   |   |   |     |    |
|-----|---|---|---|---|---|-----|----|
| 767 | 7 | 1 | 5 | 5 | 3 | 5   | 35 |
| 767 | 7 | 3 | 3 | 4 | 4 | 6.5 | 21 |
| 767 | 7 | 6 | 1 | 4 | 4 | 5   | 7  |
| 768 | 6 | 1 | 1 | 7 | 2 | 3   | 6  |
| 768 | 6 | 6 | 1 | 1 | 6 | 4   | 6  |
| 768 | 6 | 1 | 1 | 1 | 6 | 2   | 6  |
| 768 | 7 | 1 | 1 | 1 | 5 | 2.5 | 7  |
| 768 | 7 | 5 | 7 | 7 | 5 | 7   | 49 |
| 768 | 7 | 4 | 1 | 1 | 3 | 1   | 7  |
| 768 | 7 | 1 | 1 | 1 | 4 | 3.5 | 7  |
| 768 | 7 | 1 | 1 | 1 | 4 | 4   | 7  |
| 768 | 7 | 7 | 1 | 1 | 4 | 7   | 7  |
| 769 | 5 | 1 | 1 | 5 | 3 | 3.5 | 5  |
| 769 | 5 | 1 | 1 | 2 | 3 | 4   | 5  |
| 769 | 5 | 1 | 1 | 2 | 5 | 2   | 5  |
| 769 | 7 | 1 | 7 | 3 | 5 | 2.5 | 49 |
| 769 | 7 | 1 | 1 | 6 | 5 | 3   | 7  |
| 769 | 7 | 6 | 1 | 1 | 4 | 4.5 | 7  |
| 769 | 7 | 1 | 1 | 3 | 5 | 6.5 | 7  |
| 769 | 7 | 5 | 1 | 1 | 4 | 7   | 7  |
| 769 | 7 | 5 | 1 | 1 | 4 | 6.5 | 7  |
| 770 | 3 | 4 | 1 | 7 | 3 | 4.5 | 3  |
| 770 | 3 | 1 | 1 | 1 | 5 | 5.5 | 3  |
| 770 | 3 | 1 | 1 | 1 | 3 | 3   | 3  |
| 770 | 7 | 1 | 1 | 4 | 5 | 2   | 7  |
| 770 | 7 | 1 | 5 | 7 | 5 | 7   | 35 |
| 770 | 7 | 1 | 1 | 1 | 1 | 1   | 7  |
| 770 | 7 | 1 | 5 | 4 | 5 | 4   | 35 |
| 770 | 7 | 6 | 1 | 2 | 5 | 5   | 7  |
| 770 | 7 | 7 | 1 | 4 | 5 | 5   | 7  |
| 771 | 6 | 2 | 5 | 6 | 1 | 6.5 | 30 |
| 771 | 6 | 5 | 2 | 5 | 4 | 4.5 | 12 |
| 771 | 6 | 1 | 1 | 2 | 6 | 1   | 6  |
| 771 | 6 | 1 | 1 | 6 | 1 | 2   | 6  |
| 771 | 6 | 1 | 1 | 7 | 1 | 2   | 6  |
| 771 | 6 | 7 | 6 | 3 | 1 | 6   | 36 |
| 771 | 7 | 7 | 7 | 7 | 1 | 7   | 49 |
| 771 | 7 | 7 | 7 | 7 | 4 | 7   | 49 |
| 771 | 7 | 7 | 7 | 7 | 5 | 7   | 49 |
| 772 | 3 | 1 | 3 | 7 | 2 | 2.5 | 9  |
| 772 | 3 | 1 | 1 | 5 | 3 | 3.5 | 3  |
| 772 | 3 | 1 | 1 | 1 | 6 | 1.5 | 3  |
| 772 | 6 | 1 | 2 | 4 | 7 | 4.5 | 12 |
| 772 | 6 | 1 | 6 | 6 | 5 | 6   | 36 |
| 772 | 6 | 2 | 1 | 1 | 1 | 1.5 | 6  |
| 772 | 6 | 1 | 1 | 5 | 3 | 5   | 6  |
| 772 | 6 | 5 | 1 | 1 | 4 | 4.5 | 6  |
| 772 | 6 | 5 | 1 | 5 | 4 | 3.5 | 6  |
| 773 | 6 | 7 | 6 | 6 | 5 | 5   | 36 |
| 773 | 6 | 6 | 1 | 2 | 2 | 3.5 | 6  |
| 773 | 6 | 1 | 1 | 1 | 6 | 3   | 6  |

brand extension data

|     |   |   |   |   |   |     |    |
|-----|---|---|---|---|---|-----|----|
| 773 | 6 | 7 | 6 | 3 | 6 | 3   | 36 |
| 773 | 6 | 7 | 5 | 7 | 6 | 4   | 30 |
| 773 | 6 | 7 | 1 | 2 | 1 | 2.5 | 6  |
| 773 | 6 | 2 | 6 | 4 | 6 | 4   | 36 |
| 773 | 6 | 4 | 2 | 3 | 4 | 3.5 | 12 |
| 773 | 6 | 7 | 2 | 2 | 2 | 5   | 12 |
| 774 | 1 | 5 | 1 | 4 | 3 | 1.5 | 1  |
| 774 | 1 | 1 | 1 | 2 | 4 | 2.5 | 1  |
| 774 | 1 | 1 | 1 | 1 | 5 | 2   | 1  |
| 774 | 6 | 1 | 3 | 4 | 4 | 2.5 | 18 |
| 774 | 6 | 1 | 6 | 7 | 4 | 6   | 36 |
| 774 | 6 | 1 | 1 | 2 | 1 | 3   | 6  |
| 774 | 6 | 1 | 6 | 5 | 4 | 6   | 36 |
| 774 | 6 | 1 | 2 | 3 | 4 | 3   | 12 |
| 774 | 6 | 1 | 2 | 6 | 4 | 5.5 | 12 |
| 776 | 5 | 2 | 3 | 4 | 4 | 4   | 15 |
| 776 | 5 | 5 | 2 | 3 | 5 | 3   | 10 |
| 776 | 5 | 1 | 1 | 3 | 5 | 3.5 | 5  |
| 776 | 6 | 4 | 3 | 3 | 5 | 3   | 18 |
| 776 | 6 | 6 | 6 | 6 | 4 | 4.5 | 36 |
| 776 | 6 | 5 | 3 | 4 | 3 | 4   | 18 |
| 776 | 5 | 1 | 1 | 5 | 5 | 4.5 | 5  |
| 776 | 5 | 3 | 2 | 4 | 4 | 4   | 10 |
| 776 | 5 | 4 | 1 | 3 | 6 | 3   | 5  |
| 777 | 2 | 1 | 1 | 4 | 3 | 4.5 | 2  |
| 777 | 2 | 1 | 1 | 4 | 4 | 2.5 | 2  |
| 777 | 2 | 1 | 1 | 2 | 7 | 1   | 2  |
| 777 | 7 | 4 | 1 | 2 | 6 | 3   | 7  |
| 777 | 7 | 6 | 2 | 6 | 6 | 4.5 | 14 |
| 777 | 7 | 1 | 1 | 1 | 1 | 1   | 7  |
| 777 | 7 | 3 | 1 | 4 | 5 | 4   | 7  |
| 777 | 7 | 1 | 1 | 1 | 4 | 2   | 7  |
| 777 | 7 | 7 | 1 | 3 | 1 | 5   | 7  |
| 778 | 1 | 1 | 1 | 5 | 1 | 1.5 | 1  |
| 778 | 1 | 1 | 1 | 1 | 5 | 1   | 1  |
| 778 | 1 | 1 | 1 | 1 | 5 | 1   | 1  |
| 778 | 2 | 1 | 1 | 1 | 6 | 1   | 2  |
| 778 | 2 | 1 | 1 | 4 | 4 | 2   | 2  |
| 778 | 2 | 1 | 1 | 1 | 1 | 1   | 2  |
| 778 | 2 | 1 | 4 | 2 | 5 | 1   | 8  |
| 778 | 2 | 2 | 4 | 1 | 3 | 1   | 8  |
| 778 | 2 | 1 | 1 | 4 | 3 | 1   | 2  |
| 779 | 1 | 3 | 7 | 5 | 2 | 3   | 7  |
| 779 | 1 | 7 | 1 | 5 | 7 | 4   | 1  |
| 779 | 1 | 1 | 1 | 1 | 2 | 4.5 | 1  |
| 779 | 7 | 1 | 1 | 1 | 6 | 2   | 7  |
| 779 | 7 | 1 | 1 | 7 | 5 | 3.5 | 7  |
| 779 | 7 | 1 | 1 | 1 | 1 | 1.5 | 7  |
| 779 | 4 | 1 | 4 | 1 | 3 | 4.5 | 16 |
| 779 | 4 | 4 | 1 | 1 | 5 | 4   | 4  |
| 779 | 4 | 5 | 1 | 2 | 4 | 5   | 4  |

brand extension data

|     |   |   |   |   |   |     |    |
|-----|---|---|---|---|---|-----|----|
| 780 | 2 | 1 | 1 | 1 | 2 | 1.5 | 2  |
| 780 | 2 | 1 | 1 | 1 | 2 | 1.5 | 2  |
| 780 | 2 | 1 | 1 | 1 | 2 | 1.5 | 2  |
| 780 | 6 | 1 | 1 | 1 | 2 | 2   | 6  |
| 780 | 6 | 1 | 7 | 7 | 2 | 5.5 | 42 |
| 780 | 6 | 1 | 1 | 1 | 2 | 1.5 | 6  |
| 780 | 7 | 1 | 1 | 1 | 2 | 1.5 | 7  |
| 780 | 7 | 6 | 1 | 6 | 2 | 6   | 7  |
| 780 | 7 | 7 | 1 | 6 | 2 | 6   | 7  |
| 781 | 2 | 7 | 2 | 4 | 3 | 2   | 4  |
| 781 | 2 | 1 | 1 | 4 | 3 | 3   | 2  |
| 781 | 2 | 1 | 1 | 2 | 6 | 1.5 | 2  |
| 781 | 5 | 5 | 4 | 3 | 4 | 3.5 | 20 |
| 781 | 5 | 7 | 5 | 5 | 3 | 4   | 25 |
| 781 | 5 | 2 | 1 | 2 | 6 | 2.5 | 5  |
| 781 | 6 | 5 | 5 | 2 | 3 | 4   | 30 |
| 781 | 6 | 2 | 2 | 1 | 6 | 3   | 12 |
| 781 | 6 | 4 | 1 | 3 | 6 | 3   | 6  |
| 782 | 3 | 1 | 4 | 5 | 2 | 4   | 12 |
| 782 | 3 | 4 | 1 | 5 | 5 | 3   | 3  |
| 782 | 3 | 1 | 1 | 1 | 6 | 1   | 3  |
| 782 | 6 | 1 | 2 | 2 | 7 | 1.5 | 12 |
| 782 | 6 | 1 | 6 | 5 | 3 | 2.5 | 36 |
| 782 | 6 | 4 | 4 | 1 | 1 | 4   | 24 |
| 782 | 6 | 1 | 6 | 5 | 3 | 3.5 | 36 |
| 782 | 6 | 1 | 1 | 1 | 2 | 2.5 | 6  |
| 782 | 6 | 6 | 1 | 3 | 2 | 5   | 6  |
| 783 | 6 | 5 | 1 | 7 | 1 | 5.5 | 6  |
| 783 | 6 | 1 | 1 | 3 | 7 | 3.5 | 6  |
| 783 | 6 | 1 | 1 | 1 | 2 | 1   | 6  |
| 783 | 7 | 1 | 1 | 7 | 7 | 2.5 | 7  |
| 783 | 7 | 6 | 1 | 7 | 7 | 4   | 7  |
| 783 | 7 | 7 | 1 | 1 | 1 | 2.5 | 7  |
| 783 | 7 | 1 | 1 | 1 | 7 | 5.5 | 7  |
| 783 | 7 | 7 | 1 | 1 | 7 | 5.5 | 7  |
| 783 | 7 | 7 | 1 | 6 | 7 | 5   | 7  |
| 784 | 6 | 2 | 1 | 6 | 3 | 2.5 | 6  |
| 784 | 6 | 5 | 5 | 7 | 4 | 6   | 30 |
| 784 | 6 | 1 | 1 | 1 | 6 | 1.5 | 6  |
| 784 | 7 | 5 | 6 | 6 | 7 | 6   | 42 |
| 784 | 7 | 5 | 5 | 7 | 5 | 6.5 | 35 |
| 784 | 7 | 1 | 1 | 2 | 2 | 2.5 | 7  |
| 784 | 6 | 5 | 5 | 2 | 6 | 5   | 30 |
| 784 | 6 | 6 | 5 | 3 | 6 | 6   | 30 |
| 784 | 6 | 6 | 4 | 2 | 6 | 4.5 | 24 |
| 785 | 2 | 4 | 1 | 5 | 1 | 4   | 2  |
| 785 | 2 | 1 | 1 | 2 | 1 | 2.5 | 2  |
| 785 | 2 | 1 | 1 | 2 | 7 | 1.5 | 2  |
| 785 | 7 | 1 | 1 | 4 | 3 | 6   | 7  |
| 785 | 7 | 1 | 1 | 6 | 3 | 6   | 7  |
| 785 | 7 | 5 | 1 | 2 | 1 | 5.5 | 7  |

brand extension data

|     |   |   |   |   |   |     |    |
|-----|---|---|---|---|---|-----|----|
| 785 | 6 | 1 | 7 | 6 | 1 | 6.5 | 42 |
| 785 | 6 | 4 | 1 | 2 | 1 | 5.5 | 6  |
| 785 | 6 | 5 | 1 | 1 | 1 | 4.5 | 6  |
| 786 | 3 | 6 | 6 | 2 | 2 | 3.5 | 18 |
| 786 | 3 | 5 | 4 | 2 | 5 | 3   | 12 |
| 786 | 3 | 2 | 4 | 2 | 5 | 3.5 | 12 |
| 786 | 6 | 1 | 3 | 6 | 2 | 3.5 | 18 |
| 786 | 6 | 1 | 7 | 6 | 2 | 5   | 42 |
| 786 | 6 | 1 | 3 | 2 | 2 | 3.5 | 18 |
| 786 | 3 | 1 | 6 | 3 | 3 | 2.5 | 18 |
| 786 | 3 | 1 | 3 | 2 | 4 | 2.5 | 9  |
| 786 | 3 | 7 | 2 | 5 | 3 | 4   | 6  |
| 787 | 6 | 6 | 6 | 6 | 1 | 3.5 | 36 |
| 787 | 6 | 2 | 1 | 6 | 4 | 3.5 | 6  |
| 787 | 6 | 1 | 1 | 1 | 7 | 1.5 | 6  |
| 787 | 7 | 1 | 1 | 1 | 1 | 1.5 | 7  |
| 787 | 7 | 1 | 1 | 4 | 6 | 1.5 | 7  |
| 787 | 7 | 5 | 1 | 1 | 1 | 1.5 | 7  |
| 787 | 7 | 7 | 6 | 4 | 4 | 6.5 | 42 |
| 787 | 7 | 7 | 4 | 4 | 4 | 7   | 28 |
| 787 | 7 | 7 | 5 | 7 | 7 | 7   | 35 |
| 788 | 4 | 3 | 6 | 2 | 3 | 5.5 | 24 |
| 788 | 4 | 7 | 6 | 3 | 6 | 5.5 | 24 |
| 788 | 4 | 1 | 1 | 1 | 6 | 1.5 | 4  |
| 788 | 7 | 2 | 3 | 4 | 4 | 3   | 21 |
| 788 | 7 | 3 | 5 | 6 | 5 | 3.5 | 35 |
| 788 | 7 | 2 | 1 | 1 | 2 | 1   | 7  |
| 788 | 7 | 6 | 6 | 6 | 5 | 6   | 42 |
| 788 | 7 | 6 | 6 | 3 | 6 | 5.5 | 42 |
| 788 | 7 | 7 | 5 | 3 | 5 | 4.5 | 35 |
| 789 | 4 | 2 | 2 | 6 | 3 | 5.5 | 8  |
| 789 | 4 | 1 | 1 | 2 | 5 | 3   | 4  |
| 789 | 4 | 1 | 1 | 1 | 4 | 1.5 | 4  |
| 789 | 7 | 1 | 3 | 3 | 6 | 2   | 21 |
| 789 | 7 | 1 | 5 | 7 | 6 | 5.5 | 35 |
| 789 | 7 | 1 | 1 | 1 | 1 | 1   | 7  |
| 789 | 7 | 2 | 3 | 5 | 5 | 4.5 | 21 |
| 789 | 7 | 4 | 1 | 4 | 4 | 3   | 7  |
| 789 | 7 | 7 | 1 | 6 | 5 | 6   | 7  |
| 790 | 1 | 7 | 7 | 3 | 3 | 5.5 | 7  |
| 790 | 1 | 6 | 4 | 2 | 4 | 3.5 | 4  |
| 790 | 1 | 2 | 4 | 3 | 3 | 4   | 4  |
| 790 | 6 | 1 | 1 | 1 | 6 | 3   | 6  |
| 790 | 6 | 7 | 7 | 3 | 5 | 2   | 42 |
| 790 | 6 | 7 | 4 | 1 | 2 | 5.5 | 24 |
| 790 | 5 | 1 | 1 | 4 | 5 | 3   | 5  |
| 790 | 5 | 6 | 7 | 3 | 6 | 6   | 35 |
| 790 | 5 | 7 | 6 | 2 | 5 | 4.5 | 30 |
| 791 | 5 | 1 | 1 | 5 | 4 | 1   | 5  |
| 791 | 5 | 1 | 1 | 5 | 4 | 2.5 | 5  |
| 791 | 5 | 1 | 1 | 2 | 5 | 1   | 5  |

brand extension data

|     |   |   |   |   |   |     |    |
|-----|---|---|---|---|---|-----|----|
| 791 | 5 | 1 | 1 | 2 | 5 | 2.5 | 5  |
| 791 | 5 | 1 | 1 | 6 | 4 | 4.5 | 5  |
| 791 | 5 | 1 | 1 | 2 | 5 | 2.5 | 5  |
| 791 | 5 | 1 | 1 | 2 | 4 | 4.5 | 5  |
| 791 | 5 | 1 | 1 | 2 | 4 | 4.5 | 5  |
| 791 | 5 | 1 | 1 | 2 | 4 | 2.5 | 5  |
| 792 | 7 | 1 | 3 | 1 | 3 | 4   | 21 |
| 792 | 7 | 6 | 1 | 1 | 6 | 4   | 7  |
| 792 | 7 | 1 | 1 | 1 | 7 | 1   | 7  |
| 792 | 7 | 1 | 1 | 1 | 7 | 2.5 | 7  |
| 792 | 7 | 1 | 1 | 1 | 6 | 1   | 7  |
| 792 | 7 | 6 | 1 | 1 | 2 | 1   | 7  |
| 792 | 1 | 1 | 1 | 1 | 2 | 1   | 1  |
| 792 | 1 | 1 | 1 | 1 | 6 | 1   | 1  |
| 792 | 1 | 6 | 1 | 1 | 6 | 1   | 1  |
| 793 | 2 | 2 | 1 | 6 | 7 | 1   | 2  |
| 793 | 2 | 1 | 1 | 3 | 5 | 3.5 | 2  |
| 793 | 2 | 1 | 1 | 1 | 3 | 1.5 | 2  |
| 793 | 6 | 1 | 1 | 1 | 7 | 4   | 6  |
| 793 | 6 | 5 | 6 | 6 | 5 | 5.5 | 36 |
| 793 | 6 | 2 | 1 | 3 | 4 | 2.5 | 6  |
| 793 | 7 | 5 | 4 | 3 | 4 | 5.5 | 28 |
| 793 | 7 | 5 | 4 | 5 | 3 | 5.5 | 28 |
| 793 | 7 | 3 | 2 | 4 | 4 | 3   | 14 |
| 794 | 5 | 4 | 3 | 3 | 5 | 4   | 15 |
| 794 | 5 | 5 | 2 | 5 | 3 | 5.5 | 10 |
| 794 | 5 | 2 | 2 | 3 | 6 | 3   | 10 |
| 794 | 6 | 4 | 4 | 4 | 4 | 4.5 | 24 |
| 794 | 6 | 5 | 5 | 6 | 2 | 5   | 30 |
| 794 | 6 | 2 | 2 | 2 | 6 | 2.5 | 12 |
| 794 | 6 | 4 | 5 | 5 | 3 | 4.5 | 30 |
| 794 | 6 | 3 | 4 | 4 | 4 | 3.5 | 24 |
| 794 | 6 | 4 | 2 | 3 | 5 | 3   | 12 |
| 795 | 6 | 7 | 6 | 7 | 1 | 5   | 36 |
| 795 | 6 | 1 | 1 | 5 | 7 | 5   | 6  |
| 795 | 6 | 5 | 1 | 1 | 7 | 6.5 | 6  |
| 795 | 6 | 3 | 4 | 1 | 7 | 2.5 | 24 |
| 795 | 6 | 7 | 7 | 7 | 1 | 5.5 | 42 |
| 795 | 6 | 4 | 1 | 1 | 7 | 3   | 6  |
| 795 | 6 | 5 | 7 | 3 | 4 | 3.5 | 42 |
| 795 | 6 | 4 | 1 | 1 | 4 | 3   | 6  |
| 795 | 6 | 7 | 1 | 1 | 4 | 5.5 | 6  |
| 796 | 4 | 6 | 5 | 6 | 2 | 5.5 | 20 |
| 796 | 4 | 3 | 1 | 6 | 2 | 3   | 4  |
| 796 | 4 | 2 | 1 | 5 | 4 | 3.5 | 4  |
| 796 | 6 | 1 | 4 | 6 | 5 | 2.5 | 24 |
| 796 | 6 | 2 | 5 | 6 | 5 | 3.5 | 30 |
| 796 | 6 | 4 | 2 | 4 | 2 | 4.5 | 12 |
| 796 | 6 | 2 | 5 | 5 | 5 | 5   | 30 |
| 796 | 6 | 3 | 3 | 4 | 5 | 4   | 18 |
| 796 | 6 | 6 | 1 | 4 | 5 | 5   | 6  |

brand extension data

|     |   |   |   |   |   |     |    |
|-----|---|---|---|---|---|-----|----|
| 797 | 5 | 1 | 1 | 6 | 3 | 4.5 | 5  |
| 797 | 5 | 7 | 1 | 6 | 3 | 4.5 | 5  |
| 797 | 5 | 1 | 1 | 5 | 6 | 3.5 | 5  |
| 797 | 6 | 5 | 4 | 6 | 5 | 3   | 24 |
| 797 | 6 | 2 | 4 | 5 | 6 | 5.5 | 24 |
| 797 | 6 | 4 | 1 | 3 | 4 | 5   | 6  |
| 797 | 6 | 6 | 1 | 5 | 3 | 4   | 6  |
| 798 | 3 | 5 | 1 | 5 | 4 | 5   | 3  |
| 799 | 4 | 1 | 1 | 5 | 2 | 2.5 | 4  |
| 799 | 4 | 4 | 1 | 3 | 5 | 3.5 | 4  |
| 799 | 4 | 1 | 1 | 3 | 4 | 2.5 | 4  |
| 799 | 5 | 1 | 1 | 5 | 2 | 2   | 5  |
| 799 | 5 | 5 | 3 | 6 | 2 | 4.5 | 15 |
| 799 | 5 | 1 | 1 | 3 | 2 | 2   | 5  |
| 799 | 4 | 3 | 1 | 4 | 3 | 4   | 4  |
| 799 | 4 | 5 | 1 | 2 | 3 | 3.5 | 4  |
| 800 | 3 | 7 | 2 | 5 | 1 | 1.5 | 6  |
| 800 | 3 | 7 | 1 | 7 | 4 | 1   | 3  |
| 800 | 3 | 4 | 1 | 5 | 5 | 1   | 3  |
| 800 | 3 | 1 | 5 | 3 | 7 | 1   | 15 |
| 800 | 3 | 1 | 7 | 7 | 4 | 2   | 21 |
| 800 | 3 | 1 | 1 | 1 | 1 | 1   | 3  |
| 800 | 6 | 1 | 7 | 6 | 5 | 4.5 | 42 |
| 800 | 6 | 1 | 1 | 3 | 4 | 4   | 6  |
| 800 | 6 | 7 | 1 | 1 | 3 | 2   | 6  |
| 801 | 4 | 6 | 5 | 5 | 2 | 4.5 | 20 |
| 801 | 4 | 2 | 2 | 5 | 4 | 4.5 | 8  |
| 801 | 4 | 5 | 6 | 3 | 6 | 5   | 24 |
| 801 | 6 | 3 | 2 | 1 | 3 | 3   | 12 |
| 801 | 6 | 6 | 6 | 6 | 3 | 3.5 | 36 |
| 801 | 6 | 2 | 1 | 2 | 1 | 2   | 6  |
| 801 | 6 | 5 | 6 | 2 | 4 | 4   | 36 |
| 801 | 6 | 4 | 4 | 2 | 4 | 2.5 | 24 |
| 801 | 6 | 6 | 2 | 5 | 3 | 6   | 12 |
| 802 | 5 | 4 | 1 | 6 | 4 | 5   | 5  |
| 802 | 5 | 1 | 1 | 6 | 5 | 3   | 5  |
| 802 | 5 | 1 | 1 | 4 | 6 | 4.5 | 5  |
| 802 | 5 | 1 | 1 | 5 | 5 | 3   | 5  |
| 802 | 5 | 1 | 1 | 7 | 5 | 3   | 5  |
| 802 | 5 | 1 | 3 | 4 | 6 | 4   | 15 |
| 802 | 7 | 1 | 5 | 6 | 6 | 6   | 35 |
| 802 | 7 | 4 | 1 | 5 | 6 | 6   | 7  |
| 802 | 7 | 6 | 1 | 5 | 6 | 7   | 7  |
| 803 | 6 | 1 | 1 | 6 | 4 | 4.5 | 6  |
| 803 | 6 | 1 | 1 | 7 | 4 | 3   | 6  |
| 803 | 6 | 1 | 1 | 6 | 4 | 3   | 6  |
| 803 | 6 | 1 | 1 | 2 | 5 | 1   | 6  |
| 803 | 6 | 1 | 1 | 7 | 3 | 1   | 6  |
| 803 | 6 | 1 | 1 | 1 | 5 | 1   | 6  |
| 803 | 4 | 1 | 1 | 6 | 4 | 2   | 4  |
| 803 | 4 | 1 | 1 | 6 | 4 | 2   | 4  |

brand extension data

|     |   |   |   |   |   |     |    |
|-----|---|---|---|---|---|-----|----|
| 804 | 3 | 6 | 5 | 6 | 3 | 1.5 | 15 |
| 804 | 3 | 4 | 2 | 5 | 6 | 2.5 | 6  |
| 804 | 3 | 2 | 1 | 6 | 4 | 1   | 3  |
| 804 | 4 | 1 | 1 | 6 | 6 | 1.5 | 4  |
| 804 | 4 | 6 | 7 | 7 | 4 | 4.5 | 28 |
| 804 | 4 | 4 | 1 | 4 | 2 | 2   | 4  |
| 804 | 7 | 2 | 5 | 6 | 5 | 5   | 35 |
| 804 | 7 | 4 | 2 | 3 | 4 | 5.5 | 14 |
| 804 | 7 | 6 | 1 | 3 | 5 | 5.5 | 7  |
| 805 | 5 | 1 | 3 | 6 | 3 | 5   | 15 |
| 805 | 5 | 3 | 1 | 5 | 4 | 4   | 5  |
| 805 | 5 | 5 | 1 | 3 | 2 | 3.5 | 5  |
| 805 | 6 | 3 | 2 | 5 | 4 | 5   | 12 |
| 805 | 6 | 5 | 4 | 7 | 5 | 6   | 24 |
| 805 | 6 | 1 | 1 | 3 | 2 | 4   | 6  |
| 805 | 6 | 6 | 6 | 7 | 5 | 6   | 36 |
| 805 | 6 | 1 | 1 | 5 | 4 | 6   | 6  |
| 805 | 6 | 4 | 1 | 6 | 3 | 4   | 6  |
| 806 | 1 | 5 | 3 | 6 | 2 | 1   | 3  |
| 806 | 1 | 6 | 1 | 2 | 5 | 3   | 1  |
| 806 | 1 | 2 | 1 | 5 | 4 | 3.5 | 1  |
| 806 | 5 | 1 | 1 | 1 | 6 | 1   | 5  |
| 806 | 5 | 1 | 6 | 6 | 4 | 4   | 30 |
| 806 | 5 | 1 | 1 | 2 | 3 | 2.5 | 5  |
| 806 | 6 | 5 | 3 | 4 | 6 | 3.5 | 18 |
| 806 | 6 | 7 | 2 | 1 | 5 | 2.5 | 12 |
| 806 | 6 | 2 | 1 | 5 | 7 | 6.5 | 6  |
| 807 | 3 | 7 | 5 | 6 | 3 | 3.5 | 15 |
| 807 | 3 | 7 | 2 | 6 | 4 | 6   | 6  |
| 807 | 3 | 4 | 1 | 1 | 6 | 4.5 | 3  |
| 807 | 3 | 5 | 3 | 1 | 3 | 4   | 9  |
| 807 | 3 | 5 | 5 | 7 | 3 | 1.5 | 15 |
| 807 | 3 | 5 | 1 | 1 | 3 | 5.5 | 3  |
| 807 | 4 | 5 | 6 | 3 | 3 | 1.5 | 24 |
| 807 | 4 | 3 | 1 | 1 | 3 | 1   | 4  |
| 807 | 4 | 7 | 1 | 1 | 7 | 5.5 | 4  |
| 808 | 3 | 1 | 1 | 3 | 3 | 1   | 3  |
| 808 | 3 | 7 | 1 | 7 | 5 | 3   | 3  |
| 808 | 3 | 1 | 1 | 1 | 6 | 2.5 | 3  |
| 808 | 6 | 1 | 1 | 1 | 6 | 2   | 6  |
| 808 | 6 | 1 | 7 | 7 | 2 | 6   | 42 |
| 808 | 6 | 5 | 1 | 1 | 6 | 1.5 | 6  |
| 808 | 6 | 1 | 7 | 6 | 3 | 6   | 42 |
| 808 | 6 | 6 | 1 | 2 | 6 | 4.5 | 6  |
| 808 | 6 | 7 | 1 | 2 | 6 | 6   | 6  |
| 809 | 2 | 4 | 6 | 2 | 6 | 2   | 12 |
| 809 | 2 | 6 | 1 | 5 | 4 | 3.5 | 2  |
| 809 | 2 | 4 | 1 | 7 | 2 | 5.5 | 2  |
| 809 | 4 | 2 | 2 | 2 | 6 | 2.5 | 8  |
| 809 | 4 | 5 | 5 | 7 | 1 | 4.5 | 20 |
| 809 | 4 | 4 | 1 | 2 | 4 | 1   | 4  |

brand extension data

|     |   |   |   |   |   |     |    |
|-----|---|---|---|---|---|-----|----|
| 809 | 7 | 2 | 3 | 3 | 5 | 3.5 | 21 |
| 809 | 7 | 5 | 5 | 1 | 6 | 4.5 | 35 |
| 809 | 7 | 7 | 5 | 2 | 7 | 7   | 35 |
| 810 | 3 | 6 | 3 | 4 | 3 | 3   | 9  |
| 810 | 3 | 1 | 1 | 2 | 6 | 2.5 | 3  |
| 810 | 3 | 1 | 1 | 4 | 4 | 1.5 | 3  |
| 810 | 5 | 1 | 1 | 2 | 7 | 3   | 5  |
| 810 | 5 | 3 | 5 | 6 | 7 | 4   | 25 |
| 810 | 5 | 3 | 1 | 1 | 3 | 2   | 5  |
| 810 | 5 | 6 | 5 | 5 | 5 | 5   | 25 |
| 810 | 5 | 1 | 1 | 2 | 5 | 2   | 5  |
| 810 | 5 | 6 | 1 | 5 | 3 | 4   | 5  |
| 811 | 5 | 3 | 2 | 4 | 5 | 5   | 10 |
| 811 | 5 | 2 | 1 | 3 | 3 | 5.5 | 5  |
| 811 | 5 | 2 | 1 | 1 | 6 | 4.5 | 5  |
| 811 | 7 | 2 | 4 | 2 | 5 | 5   | 28 |
| 811 | 7 | 2 | 2 | 7 | 4 | 5.5 | 14 |
| 811 | 7 | 4 | 1 | 1 | 3 | 4.5 | 7  |
| 811 | 7 | 2 | 5 | 5 | 6 | 6   | 35 |
| 811 | 7 | 2 | 2 | 2 | 6 | 6   | 14 |
| 811 | 7 | 6 | 2 | 6 | 5 | 6   | 14 |
| 812 | 5 | 7 | 6 | 7 | 1 | 5.5 | 30 |
| 812 | 5 | 7 | 5 | 7 | 2 | 5   | 25 |
| 812 | 5 | 4 | 2 | 4 | 6 | 3   | 10 |
| 812 | 7 | 1 | 1 | 1 | 4 | 4   | 7  |
| 812 | 7 | 7 | 7 | 4 | 1 | 6   | 49 |
| 812 | 7 | 6 | 2 | 7 | 4 | 5   | 14 |
| 812 | 7 | 5 | 6 | 6 | 2 | 5.5 | 42 |
| 812 | 7 | 2 | 2 | 3 | 5 | 5   | 14 |
| 812 | 7 | 7 | 5 | 7 | 1 | 6.5 | 35 |
| 813 | 3 | 3 | 2 | 5 | 5 | 2.5 | 6  |
| 813 | 3 | 1 | 2 | 5 | 4 | 2.5 | 6  |
| 813 | 3 | 1 | 1 | 3 | 2 | 1.5 | 3  |
| 813 | 5 | 1 | 1 | 2 | 2 | 1.5 | 5  |
| 813 | 5 | 5 | 5 | 5 | 5 | 5.5 | 25 |
| 813 | 5 | 1 | 1 | 2 | 2 | 1.5 | 5  |
| 813 | 5 | 5 | 5 | 5 | 5 | 6   | 25 |
| 813 | 5 | 2 | 2 | 6 | 3 | 3   | 10 |
| 813 | 5 | 4 | 4 | 3 | 5 | 4   | 20 |
| 814 | 1 | 3 | 3 | 6 | 2 | 2   | 3  |
| 814 | 1 | 1 | 1 | 4 | 4 | 4   | 1  |
| 814 | 1 | 1 | 1 | 2 | 4 | 2.5 | 1  |
| 814 | 5 | 2 | 2 | 3 | 5 | 4   | 10 |
| 814 | 5 | 5 | 3 | 6 | 2 | 5   | 15 |
| 814 | 5 | 2 | 1 | 2 | 5 | 3.5 | 5  |
| 814 | 6 | 1 | 5 | 5 | 3 | 5   | 30 |
| 814 | 6 | 5 | 1 | 5 | 3 | 4.5 | 6  |
| 814 | 6 | 6 | 1 | 5 | 3 | 4.5 | 6  |
| 815 | 7 | 3 | 1 | 6 | 2 | 3.5 | 7  |
| 815 | 7 | 1 | 1 | 3 | 7 | 2   | 7  |
| 815 | 7 | 1 | 1 | 1 | 7 | 1.5 | 7  |

brand extension data

|     |   |   |   |   |   |     |    |
|-----|---|---|---|---|---|-----|----|
| 815 | 7 | 3 | 2 | 2 | 5 | 2.5 | 14 |
| 815 | 7 | 6 | 4 | 5 | 5 | 4.5 | 28 |
| 815 | 7 | 2 | 1 | 1 | 1 | 1   | 7  |
| 815 | 7 | 6 | 6 | 6 | 4 | 6   | 42 |
| 815 | 7 | 5 | 5 | 5 | 4 | 6   | 35 |
| 815 | 7 | 7 | 4 | 3 | 3 | 5.5 | 28 |
| 816 | 7 | 3 | 6 | 7 | 5 | 6.5 | 42 |
| 816 | 6 | 2 | 1 | 1 | 6 | 1   | 6  |
| 816 | 6 | 4 | 7 | 6 | 3 | 4.5 | 42 |
| 816 | 6 | 3 | 1 | 1 | 4 | 1   | 6  |
| 816 | 7 | 2 | 1 | 1 | 4 | 2   | 7  |
| 816 | 7 | 3 | 1 | 1 | 4 | 3   | 7  |
| 816 | 7 | 5 | 1 | 6 | 4 | 3.5 | 7  |
| 817 | 7 | 6 | 5 | 7 | 5 | 7   | 35 |
| 817 | 7 | 6 | 5 | 7 | 6 | 7   | 35 |
| 817 | 7 | 2 | 3 | 3 | 4 | 3.5 | 21 |
| 817 | 1 | 2 | 2 | 2 | 2 | 2   | 2  |
| 817 | 1 | 2 | 2 | 7 | 2 | 2.5 | 2  |
| 817 | 1 | 2 | 2 | 4 | 2 | 2   | 2  |
| 817 | 7 | 2 | 2 | 3 | 4 | 2.5 | 14 |
| 817 | 7 | 2 | 2 | 3 | 4 | 2.5 | 14 |
| 817 | 7 | 4 | 2 | 6 | 6 | 4   | 14 |
| 818 | 4 | 6 | 6 | 3 | 2 | 4.5 | 24 |
| 818 | 4 | 1 | 1 | 5 | 3 | 5.5 | 4  |
| 818 | 4 | 1 | 1 | 2 | 5 | 4   | 4  |
| 818 | 7 | 6 | 5 | 2 | 7 | 4   | 35 |
| 818 | 7 | 6 | 7 | 5 | 6 | 6.5 | 49 |
| 818 | 7 | 5 | 1 | 1 | 4 | 3.5 | 7  |
| 818 | 7 | 2 | 1 | 2 | 5 | 3.5 | 7  |
| 818 | 7 | 2 | 1 | 2 | 5 | 3.5 | 7  |
| 818 | 7 | 6 | 1 | 1 | 3 | 6.5 | 7  |
| 819 | 6 | 6 | 1 | 6 | 3 | 5.5 | 6  |
| 819 | 6 | 7 | 2 | 2 | 6 | 5   | 12 |
| 819 | 6 | 5 | 2 | 6 | 5 | 2   | 12 |
| 819 | 6 | 2 | 4 | 4 | 5 | 2.5 | 24 |
| 819 | 6 | 5 | 2 | 7 | 4 | 5.5 | 12 |
| 819 | 6 | 1 | 1 | 2 | 1 | 2   | 6  |
| 819 | 7 | 4 | 7 | 5 | 5 | 4.5 | 49 |
| 819 | 7 | 3 | 2 | 2 | 4 | 3.5 | 14 |
| 819 | 7 | 7 | 7 | 2 | 3 | 7   | 49 |
| 820 | 2 | 2 | 3 | 5 | 5 | 3   | 6  |
| 820 | 2 | 1 | 1 | 6 | 6 | 5.5 | 2  |
| 820 | 2 | 1 | 1 | 5 | 5 | 3.5 | 2  |
| 820 | 6 | 6 | 5 | 3 | 6 | 5   | 30 |
| 820 | 6 | 6 | 6 | 6 | 6 | 6   | 36 |
| 820 | 6 | 6 | 2 | 3 | 5 | 4.5 | 12 |
| 820 | 6 | 5 | 6 | 4 | 6 | 6   | 36 |
| 820 | 6 | 6 | 3 | 4 | 6 | 6   | 18 |
| 820 | 6 | 6 | 2 | 6 | 6 | 6   | 12 |
| 821 | 6 | 7 | 6 | 6 | 3 | 6.5 | 36 |
| 822 | 5 | 2 | 3 | 5 | 5 | 3.5 | 15 |

brand extension data

|     |   |   |   |   |   |     |    |
|-----|---|---|---|---|---|-----|----|
| 822 | 5 | 2 | 2 | 5 | 5 | 4   | 10 |
| 822 | 5 | 2 | 2 | 2 | 3 | 3.5 | 10 |
| 822 | 6 | 2 | 2 | 3 | 3 | 3   | 12 |
| 822 | 6 | 6 | 6 | 6 | 6 | 6   | 36 |
| 822 | 6 | 5 | 2 | 3 | 3 | 2   | 12 |
| 822 | 6 | 6 | 6 | 6 | 6 | 6   | 36 |
| 822 | 6 | 6 | 6 | 6 | 6 | 6   | 36 |
| 822 | 6 | 6 | 4 | 6 | 6 | 6   | 24 |
| 823 | 5 | 1 | 3 | 5 | 3 | 2.5 | 15 |
| 823 | 5 | 6 | 5 | 5 | 6 | 6   | 25 |
| 823 | 5 | 4 | 2 | 2 | 5 | 3.5 | 10 |
| 823 | 7 | 1 | 2 | 2 | 6 | 1   | 14 |
| 823 | 7 | 5 | 3 | 6 | 6 | 5   | 21 |
| 823 | 7 | 1 | 1 | 1 | 2 | 1.5 | 7  |
| 823 | 7 | 6 | 6 | 6 | 5 | 6   | 42 |
| 823 | 7 | 2 | 1 | 1 | 6 | 2.5 | 7  |
| 823 | 7 | 5 | 4 | 6 | 5 | 5.5 | 28 |
| 824 | 5 | 6 | 6 | 5 | 3 | 5   | 30 |
| 824 | 5 | 1 | 1 | 3 | 5 | 3.5 | 5  |
| 824 | 5 | 1 | 1 | 2 | 6 | 2.5 | 5  |
| 824 | 4 | 1 | 1 | 3 | 3 | 2.5 | 4  |
| 824 | 4 | 1 | 5 | 5 | 5 | 5   | 20 |
| 824 | 4 | 1 | 1 | 2 | 3 | 2.5 | 4  |
| 824 | 5 | 1 | 1 | 5 | 2 | 4   | 5  |
| 824 | 5 | 1 | 1 | 2 | 4 | 2   | 5  |
| 824 | 5 | 6 | 1 | 4 | 6 | 6   | 5  |
| 825 | 4 | 6 | 5 | 7 | 3 | 4.5 | 20 |
| 825 | 4 | 3 | 2 | 7 | 3 | 5.5 | 8  |
| 825 | 4 | 1 | 2 | 1 | 7 | 2   | 8  |
| 825 | 6 | 2 | 2 | 1 | 5 | 2   | 12 |
| 825 | 6 | 6 | 5 | 7 | 5 | 5.5 | 30 |
| 825 | 6 | 4 | 4 | 1 | 2 | 2   | 24 |
| 825 | 6 | 2 | 3 | 4 | 5 | 3.5 | 18 |
| 825 | 6 | 4 | 4 | 4 | 4 | 3.5 | 24 |
| 825 | 6 | 6 | 3 | 7 | 2 | 5.5 | 18 |
| 826 | 5 | 5 | 4 | 6 | 2 | 5.5 | 20 |
| 826 | 5 | 4 | 1 | 3 | 4 | 3.5 | 5  |
| 826 | 5 | 1 | 1 | 1 | 3 | 1   | 5  |
| 826 | 3 | 1 | 5 | 6 | 6 | 2.5 | 15 |
| 826 | 3 | 7 | 7 | 7 | 5 | 6.5 | 21 |
| 826 | 3 | 1 | 1 | 1 | 5 | 1   | 3  |
| 826 | 3 | 1 | 1 | 5 | 6 | 1.5 | 3  |
| 826 | 3 | 1 | 1 | 1 | 6 | 1.5 | 3  |
| 826 | 3 | 1 | 1 | 1 | 5 | 1   | 3  |
| 827 | 3 | 5 | 5 | 3 | 1 | 3.5 | 15 |
| 827 | 3 | 5 | 1 | 5 | 5 | 3.5 | 3  |
| 827 | 3 | 1 | 1 | 2 | 6 | 1.5 | 3  |
| 827 | 5 | 1 | 1 | 2 | 4 | 3   | 5  |
| 827 | 5 | 1 | 6 | 5 | 1 | 4   | 30 |
| 827 | 5 | 6 | 1 | 2 | 2 | 1   | 5  |
| 827 | 6 | 1 | 4 | 5 | 5 | 3   | 24 |

brand extension data

|     |   |   |   |   |   |     |    |
|-----|---|---|---|---|---|-----|----|
| 827 | 6 | 1 | 1 | 4 | 5 | 3.5 | 6  |
| 827 | 6 | 6 | 1 | 6 | 1 | 5   | 6  |
| 828 | 6 | 4 | 3 | 2 | 3 | 5.5 | 18 |
| 828 | 6 | 2 | 1 | 2 | 3 | 3.5 | 6  |
| 828 | 6 | 1 | 1 | 1 | 7 | 2   | 6  |
| 828 | 6 | 1 | 1 | 1 | 6 | 2.5 | 6  |
| 828 | 6 | 3 | 3 | 2 | 2 | 5   | 18 |
| 828 | 6 | 2 | 2 | 3 | 2 | 5   | 12 |
| 828 | 4 | 3 | 2 | 3 | 3 | 4   | 8  |
| 828 | 4 | 1 | 1 | 1 | 6 | 1   | 4  |
| 828 | 4 | 1 | 1 | 1 | 6 | 1   | 4  |
| 829 | 6 | 1 | 1 | 1 | 4 | 3.5 | 6  |
| 829 | 6 | 3 | 1 | 4 | 3 | 4.5 | 6  |
| 829 | 6 | 2 | 1 | 1 | 5 | 2.5 | 6  |
| 829 | 6 | 1 | 1 | 1 | 3 | 3   | 6  |
| 829 | 6 | 3 | 4 | 3 | 1 | 4.5 | 24 |
| 829 | 6 | 2 | 3 | 4 | 2 | 4   | 18 |
| 829 | 4 | 4 | 4 | 4 | 4 | 3.5 | 16 |
| 829 | 4 | 1 | 1 | 1 | 4 | 2.5 | 4  |
| 829 | 4 | 3 | 2 | 2 | 5 | 2   | 8  |
| 830 | 5 | 1 | 1 | 2 | 5 | 3   | 5  |
| 830 | 5 | 1 | 1 | 5 | 3 | 4   | 5  |
| 830 | 5 | 1 | 1 | 3 | 6 | 5.5 | 5  |
| 830 | 3 | 1 | 1 | 4 | 3 | 1.5 | 3  |
| 830 | 3 | 4 | 1 | 2 | 1 | 1.5 | 3  |
| 830 | 3 | 4 | 3 | 5 | 3 | 4.5 | 9  |
| 830 | 3 | 5 | 1 | 4 | 3 | 4   | 3  |
| 830 | 3 | 1 | 1 | 1 | 4 | 1.5 | 3  |
| 830 | 3 | 5 | 1 | 3 | 2 | 1   | 3  |
| 831 | 7 | 6 | 1 | 3 | 3 | 4   | 7  |
| 831 | 7 | 1 | 1 | 1 | 1 | 2   | 7  |
| 831 | 7 | 2 | 1 | 5 | 6 | 5.5 | 7  |
| 831 | 6 | 1 | 1 | 1 | 5 | 4.5 | 6  |
| 831 | 6 | 5 | 6 | 6 | 2 | 4   | 36 |
| 831 | 6 | 7 | 6 | 6 | 2 | 5   | 36 |
| 831 | 6 | 2 | 1 | 1 | 3 | 2.5 | 6  |
| 831 | 6 | 2 | 1 | 1 | 6 | 3   | 6  |
| 831 | 6 | 7 | 1 | 3 | 6 | 4.5 | 6  |
| 832 | 5 | 1 | 1 | 2 | 3 | 2.5 | 5  |
| 832 | 5 | 1 | 1 | 2 | 3 | 2.5 | 5  |
| 832 | 5 | 1 | 1 | 2 | 3 | 2.5 | 5  |
| 832 | 7 | 1 | 1 | 3 | 3 | 4   | 7  |
| 832 | 7 | 1 | 1 | 3 | 3 | 4   | 7  |
| 832 | 7 | 4 | 1 | 3 | 3 | 4   | 7  |
| 832 | 4 | 1 | 1 | 2 | 3 | 4   | 4  |
| 832 | 4 | 1 | 1 | 2 | 3 | 3.5 | 4  |
| 832 | 4 | 1 | 1 | 2 | 3 | 4   | 4  |
| 833 | 5 | 2 | 1 | 2 | 6 | 2.5 | 5  |
| 833 | 5 | 4 | 3 | 4 | 5 | 4.5 | 15 |
| 833 | 5 | 5 | 5 | 5 | 6 | 4.5 | 25 |
| 833 | 5 | 2 | 1 | 4 | 5 | 4.5 | 5  |

brand extension data

|     |   |   |   |   |   |     |    |
|-----|---|---|---|---|---|-----|----|
| 833 | 5 | 5 | 3 | 4 | 3 | 4.5 | 15 |
| 833 | 5 | 6 | 5 | 4 | 4 | 4.5 | 25 |
| 833 | 5 | 3 | 5 | 5 | 5 | 5   | 25 |
| 833 | 5 | 4 | 1 | 2 | 5 | 3   | 5  |
| 833 | 5 | 4 | 3 | 4 | 6 | 4   | 15 |
| 834 | 7 | 2 | 1 | 3 | 3 | 3   | 7  |
| 834 | 7 | 1 | 1 | 3 | 2 | 2   | 7  |
| 834 | 7 | 1 | 1 | 3 | 5 | 1   | 7  |
| 834 | 5 | 1 | 1 | 3 | 4 | 2   | 5  |
| 834 | 5 | 1 | 1 | 2 | 3 | 3.5 | 5  |
| 834 | 5 | 3 | 1 | 5 | 4 | 5   | 5  |
| 834 | 6 | 1 | 1 | 5 | 4 | 4.5 | 6  |
| 834 | 6 | 2 | 1 | 2 | 3 | 3   | 6  |
| 834 | 6 | 2 | 1 | 4 | 3 | 3   | 6  |
| 835 | 4 | 3 | 1 | 4 | 2 | 2   | 4  |
| 835 | 4 | 2 | 1 | 2 | 3 | 2   | 4  |
| 835 | 4 | 1 | 1 | 2 | 4 | 2   | 4  |
| 835 | 3 | 1 | 1 | 1 | 2 | 1.5 | 3  |
| 835 | 3 | 1 | 1 | 2 | 3 | 1   | 3  |
| 835 | 1 | 3 | 1 | 3 | 4 | 1.5 | 1  |
| 835 | 1 | 2 | 1 | 2 | 3 | 1.5 | 1  |
| 835 | 1 | 6 | 1 | 2 | 2 | 1.5 | 1  |
| 836 | 7 | 7 | 1 | 4 | 4 | 7   | 7  |
| 836 | 7 | 7 | 1 | 4 | 4 | 7   | 7  |
| 836 | 7 | 7 | 1 | 4 | 4 | 7   | 7  |
| 836 | 5 | 4 | 1 | 4 | 4 | 3   | 5  |
| 836 | 5 | 4 | 1 | 4 | 4 | 3   | 5  |
| 836 | 5 | 4 | 1 | 4 | 4 | 3   | 5  |
| 836 | 4 | 5 | 1 | 4 | 4 | 2.5 | 4  |
| 836 | 4 | 5 | 1 | 4 | 4 | 5   | 4  |
| 836 | 4 | 5 | 1 | 4 | 4 | 2.5 | 4  |
| 837 | 5 | 2 | 1 | 3 | 4 | 2.5 | 5  |
| 837 | 5 | 1 | 1 | 2 | 1 | 1.5 | 5  |
| 837 | 5 | 7 | 2 | 5 | 5 | 5   | 10 |
| 837 | 5 | 1 | 1 | 2 | 4 | 1   | 5  |
| 837 | 5 | 1 | 1 | 3 | 3 | 2.5 | 5  |
| 837 | 5 | 1 | 2 | 5 | 5 | 5.5 | 10 |
| 837 | 3 | 3 | 1 | 4 | 5 | 1.5 | 3  |
| 837 | 3 | 5 | 1 | 5 | 5 | 5.5 | 3  |
| 837 | 3 | 2 | 1 | 4 | 3 | 2   | 3  |
| 838 | 5 | 2 | 3 | 5 | 2 | 3.5 | 15 |
| 838 | 5 | 2 | 3 | 3 | 1 | 2.5 | 15 |
| 838 | 5 | 2 | 3 | 7 | 6 | 2.5 | 15 |
| 838 | 7 | 3 | 3 | 3 | 2 | 3   | 21 |
| 838 | 7 | 3 | 3 | 4 | 4 | 5.5 | 21 |
| 838 | 7 | 7 | 7 | 6 | 2 | 7   | 49 |
| 838 | 6 | 7 | 2 | 7 | 6 | 5.5 | 12 |
| 838 | 6 | 2 | 2 | 4 | 4 | 4.5 | 12 |
| 838 | 6 | 2 | 2 | 6 | 3 | 1   | 12 |
| 839 | 6 | 2 | 1 | 3 | 4 | 3   | 6  |
| 839 | 6 | 2 | 1 | 3 | 2 | 6   | 6  |

brand extension data

|     |   |   |   |   |   |     |    |
|-----|---|---|---|---|---|-----|----|
| 839 | 6 | 7 | 1 | 6 | 6 | 6   | 6  |
| 839 | 5 | 1 | 1 | 3 | 2 | 2.5 | 5  |
| 839 | 5 | 1 | 1 | 6 | 2 | 5.5 | 5  |
| 839 | 5 | 7 | 7 | 6 | 2 | 5.5 | 35 |
| 839 | 5 | 6 | 1 | 6 | 2 | 5.5 | 5  |
| 839 | 5 | 6 | 1 | 6 | 4 | 3.5 | 5  |
| 839 | 5 | 6 | 1 | 3 | 2 | 2.5 | 5  |
| 840 | 5 | 4 | 2 | 4 | 4 | 4   | 10 |
| 840 | 5 | 4 | 2 | 4 | 4 | 4.5 | 10 |
| 840 | 5 | 3 | 2 | 4 | 3 | 4   | 10 |
| 840 | 6 | 1 | 1 | 4 | 4 | 2   | 6  |
| 840 | 6 | 4 | 1 | 4 | 4 | 3.5 | 6  |
| 840 | 6 | 4 | 4 | 4 | 4 | 4.5 | 24 |
| 840 | 4 | 3 | 3 | 4 | 4 | 4   | 12 |
| 840 | 4 | 3 | 3 | 4 | 4 | 4   | 12 |
| 840 | 4 | 3 | 3 | 4 | 4 | 4   | 12 |
| 841 | 1 | 7 | 1 | 1 | 5 | 3.5 | 1  |
| 841 | 1 | 4 | 1 | 2 | 3 | 3   | 1  |
| 841 | 1 | 6 | 2 | 4 | 5 | 5.5 | 2  |
| 841 | 7 | 1 | 1 | 2 | 7 | 4.5 | 7  |
| 841 | 7 | 6 | 5 | 4 | 1 | 6.5 | 35 |
| 841 | 7 | 7 | 7 | 7 | 6 | 7   | 49 |
| 841 | 7 | 5 | 6 | 4 | 5 | 6.5 | 42 |
| 841 | 7 | 1 | 1 | 1 | 7 | 4   | 7  |
| 841 | 7 | 2 | 1 | 1 | 7 | 1.5 | 7  |
| 842 | 5 | 1 | 1 | 2 | 2 | 2   | 5  |
| 842 | 5 | 2 | 1 | 1 | 1 | 3.5 | 5  |
| 842 | 5 | 4 | 3 | 4 | 3 | 2   | 15 |
| 842 | 1 | 2 | 1 | 3 | 3 | 1   | 1  |
| 842 | 1 | 2 | 1 | 1 | 2 | 2.5 | 1  |
| 842 | 1 | 3 | 1 | 1 | 2 | 3   | 1  |
| 843 | 6 | 7 | 1 | 1 | 7 | 3   | 6  |
| 843 | 6 | 7 | 1 | 4 | 1 | 4   | 6  |
| 843 | 6 | 7 | 1 | 1 | 5 | 3.5 | 6  |
| 843 | 4 | 1 | 4 | 5 | 4 | 3.5 | 16 |
| 843 | 4 | 4 | 7 | 1 | 1 | 4   | 28 |
| 843 | 4 | 4 | 7 | 4 | 6 | 2.5 | 28 |
| 843 | 5 | 6 | 1 | 5 | 6 | 4   | 5  |
| 843 | 5 | 6 | 1 | 1 | 6 | 3   | 5  |
| 843 | 5 | 6 | 1 | 5 | 6 | 4   | 5  |
| 844 | 7 | 1 | 1 | 1 | 6 | 5   | 7  |
| 844 | 7 | 1 | 1 | 1 | 3 | 5   | 7  |
| 844 | 7 | 1 | 1 | 1 | 6 | 4   | 7  |
| 844 | 5 | 1 | 1 | 1 | 5 | 2.5 | 5  |
| 844 | 5 | 5 | 4 | 1 | 4 | 5.5 | 20 |
| 844 | 5 | 5 | 4 | 1 | 3 | 5   | 20 |
| 844 | 5 | 1 | 1 | 1 | 5 | 4.5 | 5  |
| 844 | 5 | 1 | 1 | 1 | 6 | 3.5 | 5  |
| 844 | 5 | 1 | 1 | 1 | 4 | 3.5 | 5  |
| 845 | 6 | 3 | 1 | 1 | 3 | 1.5 | 6  |
| 845 | 6 | 4 | 1 | 5 | 2 | 4.5 | 6  |

brand extension data

|     |   |   |   |   |   |     |    |
|-----|---|---|---|---|---|-----|----|
| 845 | 6 | 1 | 2 | 2 | 5 | 5   | 12 |
| 845 | 5 | 1 | 1 | 2 | 5 | 3.5 | 5  |
| 845 | 5 | 1 | 1 | 3 | 3 | 4.5 | 5  |
| 845 | 5 | 3 | 2 | 3 | 4 | 4   | 10 |
| 845 | 5 | 1 | 1 | 4 | 6 | 4   | 5  |
| 845 | 5 | 2 | 1 | 1 | 2 | 1.5 | 5  |
| 845 | 5 | 2 | 1 | 3 | 6 | 2.5 | 5  |
| 846 | 6 | 5 | 1 | 3 | 5 | 6   | 6  |
| 846 | 6 | 3 | 1 | 1 | 2 | 4   | 6  |
| 846 | 6 | 2 | 1 | 2 | 7 | 2.5 | 6  |
| 846 | 4 | 1 | 1 | 2 | 2 | 2   | 4  |
| 846 | 4 | 5 | 5 | 2 | 2 | 4   | 20 |
| 846 | 4 | 3 | 6 | 3 | 3 | 6   | 24 |
| 846 | 2 | 1 | 1 | 1 | 6 | 1.5 | 2  |
| 846 | 2 | 1 | 1 | 1 | 6 | 2.5 | 2  |
| 846 | 2 | 1 | 1 | 1 | 4 | 1   | 2  |
| 847 | 5 | 3 | 1 | 1 | 6 | 2   | 5  |
| 847 | 5 | 4 | 1 | 5 | 2 | 3.5 | 5  |
| 847 | 5 | 5 | 1 | 3 | 5 | 3   | 5  |
| 847 | 5 | 1 | 1 | 1 | 4 | 2.5 | 5  |
| 847 | 5 | 1 | 1 | 3 | 2 | 4.5 | 5  |
| 847 | 5 | 4 | 1 | 4 | 3 | 5.5 | 5  |
| 847 | 2 | 2 | 1 | 5 | 5 | 1   | 2  |
| 847 | 2 | 4 | 1 | 1 | 4 | 2.5 | 2  |
| 847 | 2 | 3 | 1 | 3 | 5 | 1   | 2  |
| 848 | 5 | 6 | 2 | 4 | 5 | 2   | 10 |
| 848 | 5 | 6 | 1 | 5 | 3 | 2.5 | 5  |
| 848 | 5 | 6 | 2 | 2 | 6 | 4   | 10 |
| 848 | 6 | 3 | 2 | 4 | 3 | 5   | 12 |
| 848 | 6 | 2 | 4 | 2 | 2 | 3.5 | 24 |
| 848 | 6 | 5 | 5 | 6 | 4 | 5   | 30 |
| 848 | 5 | 6 | 1 | 6 | 5 | 5   | 5  |
| 848 | 5 | 6 | 1 | 3 | 6 | 6   | 5  |
| 848 | 5 | 7 | 1 | 5 | 5 | 3.5 | 5  |
| 849 | 6 | 3 | 1 | 4 | 4 | 3.5 | 6  |
| 849 | 6 | 3 | 1 | 6 | 3 | 4.5 | 6  |
| 849 | 6 | 1 | 1 | 6 | 5 | 4   | 6  |
| 849 | 7 | 1 | 1 | 2 | 3 | 2.5 | 7  |
| 849 | 7 | 5 | 4 | 4 | 2 | 3   | 28 |
| 849 | 7 | 5 | 4 | 4 | 4 | 4.5 | 28 |
| 849 | 7 | 4 | 1 | 6 | 3 | 5   | 7  |
| 849 | 7 | 1 | 1 | 3 | 5 | 5   | 7  |
| 849 | 7 | 1 | 1 | 3 | 4 | 4   | 7  |
| 850 | 6 | 1 | 1 | 3 | 6 | 4   | 6  |
| 850 | 6 | 1 | 1 | 3 | 2 | 3.5 | 6  |
| 850 | 6 | 4 | 1 | 4 | 6 | 3   | 6  |
| 850 | 6 | 1 | 1 | 3 | 2 | 3   | 6  |
| 850 | 6 | 1 | 3 | 3 | 2 | 4   | 18 |
| 850 | 6 | 6 | 7 | 5 | 2 | 4.5 | 42 |
| 850 | 6 | 1 | 1 | 5 | 4 | 5   | 6  |
| 850 | 6 | 5 | 1 | 4 | 5 | 4.5 | 6  |

brand extension data

|     |   |   |   |   |   |     |    |
|-----|---|---|---|---|---|-----|----|
| 850 | 6 | 7 | 1 | 5 | 5 | 5   | 6  |
| 851 | 5 | 1 | 1 | 1 | 7 | 1.5 | 5  |
| 851 | 5 | 1 | 1 | 3 | 3 | 2   | 5  |
| 851 | 5 | 4 | 1 | 1 | 4 | 1.5 | 5  |
| 851 | 5 | 1 | 1 | 4 | 3 | 1.5 | 5  |
| 851 | 5 | 1 | 2 | 5 | 1 | 5   | 10 |
| 851 | 5 | 2 | 4 | 6 | 2 | 5   | 20 |
| 851 | 4 | 1 | 1 | 3 | 4 | 2   | 4  |
| 851 | 4 | 1 | 1 | 1 | 4 | 1   | 4  |
| 851 | 4 | 4 | 1 | 2 | 3 | 1.5 | 4  |
| 852 | 6 | 4 | 2 | 4 | 4 | 2.5 | 12 |
| 852 | 6 | 4 | 2 | 4 | 2 | 2.5 | 12 |
| 852 | 6 | 2 | 2 | 6 | 6 | 5.5 | 12 |
| 852 | 3 | 2 | 2 | 6 | 4 | 2.5 | 6  |
| 852 | 3 | 6 | 2 | 5 | 2 | 4   | 6  |
| 852 | 3 | 6 | 2 | 6 | 4 | 4   | 6  |
| 852 | 3 | 3 | 2 | 4 | 4 | 2   | 6  |
| 852 | 3 | 3 | 2 | 3 | 4 | 3   | 6  |
| 852 | 3 | 3 | 2 | 2 | 3 | 1.5 | 6  |
| 853 | 5 | 4 | 1 | 1 | 5 | 2.5 | 5  |
| 853 | 5 | 4 | 1 | 3 | 5 | 2   | 5  |
| 853 | 5 | 1 | 1 | 1 | 5 | 1   | 5  |
| 853 | 1 | 4 | 1 | 2 | 3 | 1   | 1  |
| 853 | 1 | 4 | 1 | 1 | 2 | 2.5 | 1  |
| 853 | 1 | 4 | 1 | 1 | 3 | 2   | 1  |
| 853 | 1 | 4 | 1 | 3 | 4 | 2.5 | 1  |
| 853 | 1 | 4 | 1 | 1 | 3 | 2   | 1  |
| 853 | 1 | 4 | 1 | 3 | 4 | 2.5 | 1  |
| 854 | 6 | 6 | 2 | 2 | 2 | 3   | 12 |
| 854 | 6 | 6 | 2 | 5 | 2 | 3   | 12 |
| 854 | 6 | 3 | 6 | 5 | 6 | 3   | 36 |
| 854 | 2 | 2 | 2 | 2 | 2 | 2   | 4  |
| 854 | 2 | 2 | 2 | 2 | 2 | 2   | 4  |
| 854 | 2 | 6 | 2 | 5 | 2 | 2   | 4  |
| 854 | 5 | 2 | 2 | 5 | 3 | 3   | 10 |
| 854 | 5 | 2 | 2 | 3 | 3 | 3   | 10 |
| 854 | 5 | 4 | 6 | 3 | 4 | 2.5 | 30 |
| 855 | 6 | 2 | 4 | 5 | 3 | 4   | 24 |
| 855 | 6 | 2 | 2 | 4 | 3 | 4.5 | 12 |
| 855 | 6 | 2 | 2 | 1 | 7 | 2   | 12 |
| 855 | 6 | 1 | 1 | 1 | 7 | 1   | 6  |
| 855 | 5 | 2 | 5 | 4 | 6 | 4   | 25 |
| 855 | 5 | 2 | 2 | 2 | 5 | 3.5 | 10 |
| 855 | 5 | 2 | 1 | 3 | 6 | 2.5 | 5  |
| 856 | 7 | 1 | 1 | 2 | 2 | 1.5 | 7  |
| 856 | 7 | 4 | 1 | 2 | 2 | 1.5 | 7  |
| 856 | 7 | 4 | 1 | 5 | 6 | 4.5 | 7  |
| 856 | 6 | 1 | 1 | 1 | 5 | 1   | 6  |
| 856 | 6 | 1 | 1 | 1 | 4 | 2.5 | 6  |
| 856 | 6 | 1 | 1 | 1 | 4 | 2   | 6  |
| 856 | 1 | 1 | 1 | 1 | 4 | 1   | 1  |

brand extension data

|     |   |   |   |   |   |     |    |
|-----|---|---|---|---|---|-----|----|
| 856 | 1 | 1 | 1 | 1 | 3 | 1   | 1  |
| 856 | 1 | 1 | 1 | 1 | 2 | 1   | 1  |
| 857 | 4 | 3 | 4 | 2 | 4 | 2   | 16 |
| 857 | 4 | 2 | 5 | 1 | 4 | 2   | 20 |
| 857 | 4 | 3 | 4 | 3 | 5 | 3   | 16 |
| 857 | 6 | 6 | 6 | 6 | 5 | 6   | 36 |
| 857 | 6 | 3 | 2 | 2 | 6 | 4.5 | 12 |
| 857 | 6 | 6 | 6 | 6 | 1 | 6   | 36 |
| 857 | 7 | 6 | 6 | 6 | 6 | 5.5 | 42 |
| 857 | 7 | 3 | 3 | 2 | 6 | 4   | 21 |
| 857 | 7 | 1 | 1 | 3 | 5 | 1.5 | 7  |
| 858 | 7 | 4 | 3 | 3 | 7 | 3   | 21 |
| 858 | 7 | 1 | 1 | 5 | 3 | 4.5 | 7  |
| 858 | 7 | 1 | 1 | 2 | 7 | 5   | 7  |
| 858 | 6 | 1 | 1 | 6 | 5 | 4.5 | 6  |
| 858 | 6 | 4 | 5 | 2 | 3 | 4.5 | 30 |
| 858 | 6 | 4 | 4 | 2 | 4 | 5   | 24 |
| 858 | 6 | 3 | 4 | 5 | 4 | 4.5 | 24 |
| 858 | 6 | 1 | 1 | 1 | 5 | 6.5 | 6  |
| 858 | 6 | 1 | 1 | 2 | 5 | 4.5 | 6  |
| 859 | 7 | 1 | 1 | 1 | 5 | 4   | 7  |
| 859 | 7 | 3 | 1 | 3 | 2 | 4   | 7  |
| 859 | 7 | 1 | 1 | 1 | 6 | 4   | 7  |
| 859 | 6 | 1 | 1 | 4 | 1 | 4   | 6  |
| 859 | 6 | 1 | 1 | 3 | 3 | 4   | 6  |
| 859 | 6 | 3 | 1 | 4 | 2 | 4.5 | 6  |
| 859 | 5 | 3 | 3 | 3 | 2 | 4.5 | 15 |
| 859 | 5 | 1 | 1 | 1 | 5 | 4   | 5  |
| 859 | 5 | 3 | 1 | 5 | 3 | 4   | 5  |
| 860 | 7 | 6 | 4 | 1 | 4 | 4   | 28 |
| 860 | 7 | 6 | 5 | 4 | 2 | 4   | 35 |
| 860 | 7 | 3 | 3 | 4 | 4 | 5   | 21 |
| 860 | 7 | 6 | 3 | 5 | 5 | 5   | 21 |
| 860 | 7 | 6 | 4 | 2 | 3 | 4.5 | 28 |
| 860 | 7 | 6 | 5 | 4 | 5 | 4   | 35 |
| 861 | 7 | 4 | 2 | 1 | 5 | 1.5 | 14 |
| 861 | 7 | 4 | 3 | 3 | 2 | 3.5 | 21 |
| 861 | 7 | 1 | 1 | 1 | 5 | 1   | 7  |
| 861 | 6 | 4 | 3 | 3 | 2 | 2.5 | 18 |
| 861 | 6 | 5 | 4 | 5 | 5 | 4.5 | 24 |
| 861 | 6 | 1 | 1 | 1 | 1 | 1   | 6  |
| 861 | 6 | 1 | 1 | 1 | 7 | 1   | 6  |
| 862 | 3 | 6 | 1 | 2 | 2 | 1.5 | 3  |
| 862 | 3 | 1 | 1 | 2 | 1 | 2.5 | 3  |
| 862 | 3 | 1 | 1 | 4 | 5 | 3   | 3  |
| 862 | 3 | 1 | 1 | 3 | 4 | 2.5 | 3  |
| 862 | 3 | 5 | 1 | 3 | 4 | 3.5 | 3  |
| 862 | 3 | 6 | 6 | 3 | 4 | 5   | 18 |
| 862 | 6 | 7 | 1 | 6 | 6 | 6   | 6  |
| 862 | 6 | 5 | 1 | 2 | 3 | 5.5 | 6  |
| 862 | 6 | 1 | 1 | 4 | 4 | 2   | 6  |

brand extension data

|     |   |   |   |   |   |     |    |
|-----|---|---|---|---|---|-----|----|
| 863 | 6 | 4 | 1 | 4 | 5 | 4   | 6  |
| 863 | 6 | 4 | 1 | 4 | 5 | 4   | 6  |
| 863 | 6 | 2 | 1 | 4 | 6 | 3.5 | 6  |
| 863 | 6 | 3 | 1 | 5 | 4 | 3.5 | 6  |
| 863 | 6 | 5 | 1 | 5 | 4 | 4   | 6  |
| 863 | 6 | 5 | 1 | 5 | 4 | 6   | 6  |
| 863 | 3 | 4 | 1 | 4 | 5 | 4   | 3  |
| 863 | 3 | 4 | 1 | 4 | 5 | 4   | 3  |
| 863 | 3 | 6 | 1 | 4 | 5 | 4.5 | 3  |
| 864 | 6 | 1 | 1 | 1 | 6 | 3   | 6  |
| 864 | 6 | 4 | 2 | 2 | 3 | 3   | 12 |
| 864 | 6 | 1 | 1 | 1 | 6 | 2.5 | 6  |
| 864 | 6 | 1 | 1 | 6 | 3 | 4   | 6  |
| 864 | 6 | 3 | 1 | 1 | 1 | 5.5 | 6  |
| 864 | 6 | 7 | 7 | 6 | 3 | 7   | 42 |
| 864 | 4 | 1 | 1 | 3 | 5 | 3   | 4  |
| 864 | 4 | 1 | 1 | 1 | 3 | 3   | 4  |
| 864 | 4 | 1 | 1 | 3 | 6 | 3   | 4  |
| 865 | 6 | 4 | 1 | 2 | 3 | 5   | 6  |
| 865 | 6 | 3 | 1 | 2 | 3 | 4   | 6  |
| 865 | 6 | 1 | 1 | 2 | 5 | 3.5 | 6  |
| 865 | 4 | 1 | 1 | 5 | 5 | 3.5 | 4  |
| 865 | 4 | 4 | 1 | 3 | 2 | 6   | 4  |
| 865 | 4 | 5 | 1 | 4 | 4 | 4   | 4  |
| 865 | 5 | 1 | 1 | 4 | 6 | 3.5 | 5  |
| 865 | 5 | 3 | 1 | 2 | 3 | 3.5 | 5  |
| 865 | 5 | 4 | 1 | 2 | 4 | 4   | 5  |
| 866 | 7 | 6 | 1 | 7 | 1 | 4.5 | 7  |
| 866 | 7 | 1 | 1 | 7 | 1 | 4.5 | 7  |
| 866 | 7 | 7 | 1 | 7 | 4 | 6.5 | 7  |
| 866 | 5 | 1 | 1 | 3 | 3 | 5   | 5  |
| 866 | 5 | 1 | 1 | 3 | 3 | 4.5 | 5  |
| 866 | 5 | 6 | 1 | 5 | 3 | 6.5 | 5  |
| 866 | 2 | 7 | 1 | 4 | 1 | 2   | 2  |
| 866 | 2 | 5 | 1 | 1 | 1 | 2.5 | 2  |
| 866 | 2 | 5 | 4 | 7 | 1 | 3.5 | 8  |
| 867 | 5 | 6 | 1 | 1 | 5 | 3   | 5  |
| 867 | 5 | 6 | 1 | 6 | 3 | 6   | 5  |
| 867 | 5 | 1 | 1 | 2 | 7 | 1.5 | 5  |
| 867 | 5 | 1 | 1 | 2 | 4 | 3   | 5  |
| 867 | 5 | 6 | 2 | 5 | 4 | 5.5 | 10 |
| 867 | 5 | 6 | 5 | 5 | 5 | 6   | 25 |
| 867 | 4 | 6 | 1 | 6 | 5 | 4.5 | 4  |
| 867 | 4 | 4 | 1 | 1 | 7 | 3.5 | 4  |
| 867 | 4 | 4 | 1 | 1 | 6 | 3   | 4  |
| 868 | 6 | 6 | 4 | 5 | 6 | 4.5 | 24 |
| 868 | 6 | 6 | 4 | 5 | 5 | 4.5 | 24 |
| 868 | 6 | 5 | 4 | 5 | 6 | 4   | 24 |
| 868 | 5 | 5 | 3 | 6 | 4 | 4.5 | 15 |
| 868 | 5 | 5 | 3 | 6 | 4 | 3.5 | 15 |
| 868 | 5 | 5 | 3 | 6 | 4 | 5   | 15 |

brand extension data

|     |   |   |   |   |   |     |    |
|-----|---|---|---|---|---|-----|----|
| 868 | 3 | 5 | 3 | 4 | 5 | 4   | 9  |
| 868 | 3 | 5 | 3 | 4 | 5 | 3.5 | 9  |
| 868 | 3 | 5 | 3 | 4 | 5 | 2   | 9  |
| 869 | 6 | 4 | 2 | 4 | 4 | 4.5 | 12 |
| 869 | 6 | 4 | 2 | 4 | 2 | 4.5 | 12 |
| 869 | 6 | 3 | 2 | 4 | 6 | 2.5 | 12 |
| 869 | 5 | 1 | 1 | 2 | 5 | 2   | 5  |
| 869 | 5 | 2 | 3 | 4 | 4 | 3.5 | 15 |
| 869 | 5 | 6 | 4 | 5 | 2 | 4.5 | 20 |
| 869 | 6 | 4 | 3 | 4 | 4 | 4   | 18 |
| 869 | 6 | 3 | 3 | 2 | 3 | 3.5 | 18 |
| 869 | 6 | 2 | 1 | 2 | 6 | 1.5 | 6  |
| 870 | 6 | 3 | 2 | 2 | 5 | 2.5 | 12 |
| 870 | 6 | 3 | 2 | 2 | 5 | 2   | 12 |
| 870 | 6 | 5 | 3 | 5 | 3 | 4   | 18 |
| 870 | 5 | 3 | 2 | 3 | 5 | 3   | 10 |
| 870 | 5 | 5 | 5 | 6 | 3 | 5.5 | 25 |
| 870 | 5 | 3 | 2 | 3 | 5 | 3   | 10 |
| 870 | 5 | 5 | 2 | 5 | 3 | 4   | 10 |
| 870 | 5 | 3 | 2 | 4 | 5 | 3   | 10 |
| 870 | 5 | 3 | 2 | 3 | 5 | 2   | 10 |
| 871 | 7 | 2 | 1 | 1 | 7 | 1.5 | 7  |
| 871 | 7 | 2 | 1 | 5 | 5 | 4   | 7  |
| 871 | 7 | 1 | 1 | 6 | 7 | 3   | 7  |
| 871 | 3 | 1 | 1 | 5 | 5 | 1.5 | 3  |
| 871 | 3 | 1 | 1 | 2 | 1 | 2.5 | 3  |
| 871 | 3 | 1 | 1 | 4 | 4 | 2   | 3  |
| 871 | 2 | 1 | 1 | 3 | 5 | 1.5 | 2  |
| 871 | 2 | 1 | 1 | 1 | 5 | 4   | 2  |
| 871 | 2 | 1 | 1 | 3 | 5 | 1.5 | 2  |
| 872 | 7 | 6 | 1 | 2 | 1 | 4   | 7  |
| 872 | 7 | 6 | 1 | 3 | 2 | 5.5 | 7  |
| 872 | 7 | 2 | 1 | 5 | 2 | 3.5 | 7  |
| 872 | 7 | 1 | 1 | 3 | 2 | 5.5 | 7  |
| 872 | 7 | 5 | 1 | 3 | 2 | 5.5 | 7  |
| 872 | 7 | 5 | 2 | 3 | 2 | 6.5 | 14 |
| 872 | 6 | 5 | 1 | 5 | 2 | 6   | 6  |
| 872 | 6 | 6 | 1 | 1 | 4 | 5   | 6  |
| 872 | 6 | 6 | 1 | 3 | 4 | 4.5 | 6  |
| 873 | 7 | 1 | 1 | 1 | 7 | 2.5 | 7  |
| 873 | 7 | 1 | 1 | 5 | 1 | 2.5 | 7  |
| 873 | 7 | 1 | 1 | 1 | 7 | 1   | 7  |
| 873 | 7 | 1 | 1 | 5 | 4 | 2.5 | 7  |
| 873 | 7 | 1 | 4 | 3 | 4 | 5   | 28 |
| 873 | 7 | 1 | 1 | 5 | 4 | 2.5 | 7  |
| 873 | 4 | 1 | 1 | 5 | 5 | 2   | 4  |
| 873 | 4 | 1 | 1 | 2 | 5 | 2   | 4  |
| 873 | 4 | 1 | 1 | 5 | 7 | 2.5 | 4  |
| 874 | 6 | 4 | 1 | 4 | 2 | 5.5 | 6  |
| 874 | 6 | 1 | 1 | 4 | 2 | 2   | 6  |
| 874 | 6 | 1 | 1 | 4 | 5 | 3.5 | 6  |

brand extension data

|     |   |   |   |   |   |     |    |
|-----|---|---|---|---|---|-----|----|
| 874 | 4 | 1 | 1 | 4 | 4 | 4   | 4  |
| 874 | 4 | 4 | 4 | 4 | 4 | 5   | 16 |
| 874 | 4 | 4 | 4 | 4 | 4 | 5   | 16 |
| 874 | 2 | 1 | 1 | 4 | 4 | 1.5 | 2  |
| 874 | 2 | 1 | 1 | 4 | 4 | 1.5 | 2  |
| 874 | 2 | 1 | 1 | 4 | 4 | 1.5 | 2  |
| 875 | 6 | 1 | 2 | 2 | 3 | 2.5 | 12 |
| 875 | 6 | 1 | 2 | 5 | 2 | 2   | 12 |
| 875 | 6 | 1 | 2 | 2 | 6 | 3   | 12 |
| 875 | 6 | 1 | 2 | 5 | 5 | 3   | 12 |
| 875 | 6 | 1 | 2 | 2 | 1 | 6   | 12 |
| 875 | 6 | 1 | 2 | 2 | 2 | 3.5 | 12 |
| 875 | 6 | 1 | 1 | 6 | 3 | 4.5 | 6  |
| 875 | 6 | 1 | 1 | 2 | 2 | 2   | 6  |
| 875 | 6 | 1 | 1 | 2 | 5 | 1.5 | 6  |
| 876 | 6 | 4 | 1 | 1 | 4 | 5   | 6  |
| 876 | 6 | 3 | 1 | 6 | 2 | 4.5 | 6  |
| 876 | 6 | 1 | 1 | 1 | 6 | 3.5 | 6  |
| 876 | 4 | 1 | 1 | 2 | 5 | 1.5 | 4  |
| 876 | 4 | 3 | 1 | 3 | 2 | 4   | 4  |
| 876 | 4 | 2 | 2 | 2 | 3 | 4   | 8  |
| 876 | 4 | 1 | 1 | 2 | 3 | 3.5 | 4  |
| 876 | 4 | 1 | 1 | 1 | 3 | 1.5 | 4  |
| 876 | 4 | 1 | 1 | 2 | 3 | 1   | 4  |
| 877 | 5 | 2 | 2 | 3 | 5 | 3.5 | 10 |
| 877 | 5 | 4 | 2 | 3 | 4 | 3   | 10 |
| 877 | 5 | 3 | 3 | 4 | 4 | 5   | 15 |
| 877 | 6 | 2 | 3 | 2 | 4 | 3   | 18 |
| 877 | 6 | 3 | 2 | 2 | 4 | 3.5 | 12 |
| 877 | 4 | 2 | 2 | 3 | 4 | 4.5 | 8  |
| 877 | 4 | 4 | 3 | 3 | 5 | 3.5 | 12 |
| 877 | 4 | 3 | 4 | 4 | 3 | 3   | 16 |
| 878 | 6 | 2 | 1 | 1 | 6 | 2.5 | 6  |
| 878 | 6 | 4 | 1 | 4 | 4 | 4   | 6  |
| 878 | 6 | 3 | 1 | 2 | 6 | 3   | 6  |
| 878 | 7 | 1 | 1 | 1 | 4 | 2.5 | 7  |
| 878 | 7 | 5 | 4 | 3 | 3 | 5.5 | 28 |
| 878 | 7 | 6 | 6 | 5 | 2 | 6   | 42 |
| 878 | 6 | 5 | 1 | 1 | 3 | 5   | 6  |
| 878 | 6 | 2 | 1 | 4 | 6 | 3   | 6  |
| 878 | 6 | 4 | 2 | 5 | 4 | 3.5 | 12 |
| 879 | 5 | 4 | 1 | 2 | 4 | 2   | 5  |
| 879 | 5 | 4 | 1 | 2 | 3 | 2   | 5  |
| 879 | 5 | 1 | 1 | 5 | 6 | 3.5 | 5  |
| 879 | 6 | 4 | 1 | 3 | 2 | 3.5 | 6  |
| 879 | 6 | 6 | 1 | 6 | 1 | 6   | 6  |
| 879 | 6 | 5 | 3 | 5 | 4 | 6   | 18 |
| 879 | 6 | 1 | 1 | 2 | 4 | 4.5 | 6  |
| 879 | 6 | 1 | 1 | 2 | 3 | 2   | 6  |
| 879 | 6 | 1 | 1 | 1 | 5 | 1.5 | 6  |
| 880 | 5 | 3 | 5 | 3 | 3 | 2.5 | 25 |

brand extension data

|     |   |   |   |   |   |     |    |
|-----|---|---|---|---|---|-----|----|
| 880 | 5 | 3 | 1 | 3 | 3 | 2.5 | 5  |
| 880 | 5 | 3 | 4 | 1 | 7 | 4   | 20 |
| 880 | 5 | 1 | 1 | 4 | 3 | 4   | 5  |
| 880 | 5 | 1 | 1 | 3 | 3 | 4   | 5  |
| 880 | 5 | 1 | 3 | 3 | 3 | 4.5 | 15 |
| 880 | 5 | 1 | 1 | 5 | 2 | 4.5 | 5  |
| 880 | 5 | 1 | 1 | 2 | 2 | 4   | 5  |
| 880 | 5 | 1 | 1 | 1 | 6 | 2   | 5  |
| 881 | 4 | 1 | 1 | 2 | 6 | 2.5 | 4  |
| 881 | 4 | 1 | 1 | 2 | 1 | 2.5 | 4  |
| 881 | 4 | 1 | 1 | 2 | 5 | 2.5 | 4  |
| 881 | 2 | 1 | 1 | 2 | 1 | 1   | 2  |
| 881 | 2 | 1 | 1 | 2 | 1 | 1.5 | 2  |
| 881 | 2 | 1 | 1 | 2 | 1 | 2.5 | 2  |
| 881 | 5 | 1 | 1 | 1 | 5 | 1.5 | 5  |
| 881 | 5 | 1 | 1 | 1 | 3 | 1   | 5  |
| 881 | 5 | 1 | 1 | 1 | 4 | 2.5 | 5  |
| 882 | 5 | 1 | 1 | 1 | 5 | 1   | 5  |
| 882 | 5 | 1 | 1 | 5 | 3 | 1   | 5  |
| 882 | 5 | 1 | 1 | 1 | 6 | 1   | 5  |
| 882 | 3 | 1 | 1 | 5 | 4 | 1   | 3  |
| 882 | 3 | 1 | 1 | 1 | 4 | 1   | 3  |
| 882 | 3 | 1 | 1 | 4 | 4 | 1   | 3  |
| 882 | 5 | 1 | 3 | 4 | 5 | 1   | 15 |
| 882 | 5 | 1 | 1 | 1 | 6 | 1   | 5  |
| 882 | 5 | 1 | 1 | 3 | 6 | 1   | 5  |
| 883 | 6 | 2 | 3 | 1 | 3 | 3.5 | 18 |
| 883 | 6 | 1 | 1 | 1 | 3 | 3   | 6  |
| 883 | 6 | 5 | 5 | 5 | 4 | 5   | 30 |
| 883 | 6 | 1 | 1 | 1 | 2 | 1.5 | 6  |
| 883 | 6 | 1 | 1 | 1 | 2 | 1.5 | 6  |
| 883 | 6 | 6 | 5 | 5 | 2 | 4.5 | 30 |
| 883 | 3 | 1 | 1 | 1 | 1 | 2   | 3  |
| 883 | 3 | 1 | 3 | 1 | 1 | 1   | 9  |
| 883 | 3 | 1 | 1 | 1 | 1 | 1   | 3  |
| 884 | 6 | 1 | 1 | 1 | 4 | 2   | 6  |
| 884 | 6 | 1 | 1 | 1 | 2 | 2   | 6  |
| 884 | 6 | 1 | 1 | 4 | 7 | 4   | 6  |
| 884 | 4 | 1 | 4 | 5 | 3 | 5   | 16 |
| 884 | 4 | 1 | 1 | 2 | 3 | 4   | 4  |
| 884 | 4 | 7 | 4 | 3 | 3 | 4   | 16 |
| 884 | 5 | 1 | 1 | 5 | 4 | 2   | 5  |
| 884 | 5 | 1 | 1 | 1 | 6 | 2.5 | 5  |
| 884 | 5 | 4 | 1 | 5 | 6 | 1.5 | 5  |
| 885 | 7 | 3 | 1 | 2 | 3 | 3   | 7  |
| 885 | 7 | 1 | 1 | 6 | 1 | 2   | 7  |
| 885 | 4 | 1 | 1 | 6 | 1 | 5   | 4  |
| 885 | 4 | 1 | 1 | 2 | 1 | 3.5 | 4  |
| 885 | 4 | 5 | 1 | 2 | 1 | 5   | 4  |
| 885 | 7 | 1 | 1 | 6 | 2 | 2.5 | 7  |
| 885 | 7 | 1 | 1 | 2 | 1 | 1.5 | 7  |

brand extension data

|     |   |   |   |   |   |     |    |
|-----|---|---|---|---|---|-----|----|
| 885 | 7 | 5 | 1 | 6 | 2 | 1.5 | 7  |
| 887 | 7 | 6 | 3 | 6 | 4 | 5.5 | 21 |
| 887 | 7 | 6 | 3 | 6 | 4 | 5.5 | 21 |
| 887 | 7 | 6 | 3 | 7 | 4 | 5.5 | 21 |
| 887 | 4 | 2 | 3 | 5 | 3 | 4   | 12 |
| 887 | 4 | 2 | 3 | 5 | 3 | 3.5 | 12 |
| 887 | 4 | 2 | 2 | 5 | 3 | 3.5 | 8  |
| 887 | 3 | 2 | 2 | 4 | 4 | 2.5 | 6  |
| 887 | 3 | 2 | 2 | 5 | 6 | 3.5 | 6  |
| 887 | 3 | 2 | 2 | 3 | 4 | 1   | 6  |
| 888 | 5 | 6 | 1 | 1 | 2 | 3   | 5  |
| 888 | 5 | 5 | 1 | 6 | 2 | 4.5 | 5  |
| 888 | 5 | 4 | 1 | 2 | 5 | 4   | 5  |
| 888 | 4 | 3 | 3 | 4 | 3 | 4   | 12 |
| 888 | 4 | 4 | 7 | 3 | 3 | 4   | 28 |
| 888 | 4 | 5 | 7 | 6 | 5 | 5   | 28 |
| 888 | 4 | 5 | 1 | 4 | 5 | 3.5 | 4  |
| 888 | 4 | 4 | 1 | 2 | 5 | 3   | 4  |
| 888 | 4 | 2 | 1 | 4 | 4 | 2   | 4  |
| 889 | 7 | 5 | 1 | 7 | 7 | 4.5 | 7  |
| 889 | 7 | 5 | 1 | 7 | 7 | 4.5 | 7  |
| 889 | 7 | 5 | 1 | 7 | 7 | 4.5 | 7  |
| 889 | 5 | 1 | 1 | 7 | 7 | 3   | 5  |
| 889 | 5 | 1 | 1 | 7 | 7 | 3   | 5  |
| 889 | 5 | 1 | 1 | 7 | 7 | 4.5 | 5  |
| 889 | 1 | 1 | 1 | 7 | 7 | 1   | 1  |
| 889 | 1 | 1 | 1 | 7 | 7 | 1   | 1  |
| 889 | 1 | 1 | 1 | 7 | 7 | 1   | 1  |
| 890 | 6 | 2 | 1 | 1 | 4 | 1   | 6  |
| 890 | 6 | 3 | 1 | 1 | 3 | 1   | 6  |
| 890 | 6 | 3 | 1 | 4 | 4 | 3   | 6  |
| 890 | 5 | 3 | 5 | 6 | 4 | 4   | 25 |
| 890 | 5 | 4 | 1 | 2 | 1 | 1.5 | 5  |
| 890 | 5 | 2 | 1 | 3 | 3 | 3.5 | 5  |
| 890 | 3 | 4 | 3 | 7 | 4 | 3   | 9  |
| 890 | 3 | 3 | 1 | 1 | 5 | 2   | 3  |
| 890 | 3 | 5 | 1 | 5 | 6 | 1.5 | 3  |
| 891 | 6 | 4 | 1 | 2 | 6 | 3.5 | 6  |
| 891 | 6 | 4 | 1 | 2 | 6 | 3.5 | 6  |
| 891 | 6 | 4 | 1 | 2 | 6 | 3.5 | 6  |
| 891 | 6 | 3 | 1 | 4 | 4 | 5   | 6  |
| 891 | 6 | 4 | 1 | 4 | 4 | 4.5 | 6  |
| 891 | 6 | 4 | 1 | 3 | 4 | 4   | 6  |
| 891 | 5 | 4 | 1 | 3 | 4 | 4.5 | 5  |
| 891 | 5 | 3 | 1 | 1 | 5 | 3.5 | 5  |
| 891 | 5 | 5 | 1 | 1 | 6 | 2.5 | 5  |
| 892 | 5 | 5 | 1 | 5 | 5 | 4.5 | 5  |
| 892 | 5 | 5 | 1 | 5 | 4 | 5   | 5  |
| 892 | 5 | 5 | 1 | 5 | 5 | 6   | 5  |
| 892 | 4 | 1 | 1 | 6 | 5 | 4   | 4  |
| 892 | 4 | 1 | 2 | 4 | 2 | 4   | 8  |

brand extension data

|     |   |   |   |   |   |     |    |
|-----|---|---|---|---|---|-----|----|
| 892 | 4 | 1 | 2 | 4 | 3 | 4   | 8  |
| 892 | 5 | 1 | 1 | 5 | 3 | 4.5 | 5  |
| 892 | 5 | 1 | 1 | 4 | 4 | 5   | 5  |
| 892 | 5 | 5 | 1 | 4 | 4 | 4.5 | 5  |
| 893 | 4 | 5 | 1 | 2 | 6 | 4   | 4  |
| 893 | 4 | 5 | 1 | 2 | 2 | 4   | 4  |
| 893 | 4 | 5 | 1 | 2 | 2 | 4   | 4  |
| 893 | 5 | 6 | 1 | 5 | 5 | 4.5 | 5  |
| 893 | 5 | 6 | 1 | 3 | 2 | 3.5 | 5  |
| 893 | 5 | 6 | 1 | 2 | 5 | 4   | 5  |
| 893 | 6 | 6 | 1 | 3 | 5 | 4.5 | 6  |
| 893 | 6 | 6 | 1 | 2 | 3 | 4   | 6  |
| 893 | 6 | 6 | 1 | 3 | 4 | 4   | 6  |
| 894 | 6 | 4 | 1 | 2 | 5 | 3   | 6  |
| 894 | 6 | 2 | 1 | 4 | 2 | 3   | 6  |
| 894 | 6 | 2 | 3 | 3 | 5 | 5   | 18 |
| 894 | 4 | 2 | 5 | 5 | 2 | 3   | 20 |
| 894 | 4 | 5 | 2 | 2 | 2 | 4   | 8  |
| 894 | 4 | 4 | 2 | 5 | 2 | 3.5 | 8  |
| 894 | 4 | 5 | 2 | 5 | 3 | 3.5 | 8  |
| 894 | 4 | 5 | 2 | 2 | 4 | 3   | 8  |
| 894 | 4 | 5 | 2 | 2 | 6 | 2.5 | 8  |
| 895 | 7 | 3 | 4 | 4 | 7 | 4   | 28 |
| 895 | 7 | 3 | 4 | 4 | 5 | 4   | 28 |
| 895 | 7 | 3 | 4 | 4 | 6 | 3.5 | 28 |
| 895 | 7 | 3 | 4 | 4 | 5 | 3   | 28 |
| 895 | 7 | 3 | 4 | 4 | 2 | 4   | 28 |
| 895 | 7 | 3 | 4 | 4 | 3 | 3.5 | 28 |
| 895 | 4 | 3 | 4 | 4 | 6 | 4   | 16 |
| 895 | 4 | 3 | 4 | 4 | 4 | 4   | 16 |
| 895 | 4 | 3 | 4 | 4 | 5 | 4   | 16 |
| 896 | 7 | 5 | 1 | 1 | 2 | 1   | 7  |
| 896 | 7 | 5 | 1 | 4 | 2 | 2.5 | 7  |
| 896 | 7 | 5 | 4 | 2 | 5 | 4   | 28 |
| 896 | 3 | 1 | 1 | 4 | 3 | 2   | 3  |
| 896 | 3 | 4 | 1 | 1 | 1 | 2   | 3  |
| 896 | 3 | 4 | 1 | 2 | 1 | 2   | 3  |
| 896 | 4 | 1 | 1 | 5 | 4 | 3   | 4  |
| 896 | 4 | 5 | 1 | 1 | 5 | 4   | 4  |
| 896 | 4 | 6 | 1 | 4 | 6 | 3.5 | 4  |
| 897 | 6 | 4 | 3 | 2 | 4 | 2   | 18 |
| 897 | 6 | 1 | 1 | 4 | 3 | 2   | 6  |
| 897 | 6 | 5 | 5 | 2 | 4 | 5   | 30 |
| 897 | 5 | 6 | 6 | 6 | 3 | 5.5 | 30 |
| 897 | 5 | 3 | 2 | 1 | 1 | 2.5 | 10 |
| 897 | 5 | 6 | 4 | 5 | 4 | 4.5 | 20 |
| 897 | 5 | 4 | 3 | 5 | 3 | 3.5 | 15 |
| 897 | 5 | 1 | 1 | 1 | 3 | 1   | 5  |
| 897 | 5 | 3 | 4 | 5 | 3 | 2   | 20 |
| 898 | 3 | 1 | 1 | 1 | 1 | 1   | 3  |
| 898 | 3 | 1 | 1 | 5 | 1 | 1   | 3  |

brand extension data

|     |   |   |   |   |   |     |    |
|-----|---|---|---|---|---|-----|----|
| 898 | 3 | 1 | 1 | 1 | 1 | 1   | 3  |
| 898 | 3 | 1 | 1 | 1 | 6 | 1   | 3  |
| 898 | 3 | 1 | 1 | 1 | 6 | 1   | 3  |
| 898 | 3 | 6 | 1 | 1 | 6 | 6   | 3  |
| 898 | 1 | 1 | 1 | 5 | 1 | 1   | 1  |
| 898 | 1 | 1 | 1 | 1 | 1 | 1   | 1  |
| 898 | 1 | 1 | 1 | 5 | 1 | 1   | 1  |
| 899 | 6 | 2 | 1 | 1 | 5 | 4.5 | 6  |
| 899 | 6 | 1 | 1 | 1 | 2 | 2.5 | 6  |
| 899 | 6 | 1 | 1 | 3 | 7 | 4.5 | 6  |
| 899 | 5 | 1 | 1 | 2 | 2 | 3   | 5  |
| 899 | 5 | 1 | 1 | 3 | 1 | 3   | 5  |
| 899 | 5 | 3 | 1 | 2 | 4 | 2.5 | 5  |
| 899 | 2 | 1 | 1 | 4 | 5 | 1.5 | 2  |
| 899 | 2 | 3 | 1 | 3 | 6 | 2.5 | 2  |
| 899 | 2 | 1 | 1 | 1 | 6 | 1   | 2  |
| 900 | 5 | 2 | 1 | 2 | 4 | 1.5 | 5  |
| 900 | 5 | 1 | 1 | 3 | 3 | 2   | 5  |
| 900 | 5 | 5 | 4 | 4 | 5 | 4.5 | 20 |
| 900 | 6 | 2 | 1 | 3 | 3 | 2   | 6  |
| 900 | 6 | 5 | 6 | 5 | 2 | 6   | 36 |
| 900 | 6 | 5 | 6 | 5 | 4 | 4.5 | 36 |
| 900 | 3 | 4 | 2 | 5 | 4 | 3.5 | 6  |
| 900 | 3 | 2 | 2 | 3 | 5 | 3.5 | 6  |
| 900 | 3 | 2 | 2 | 3 | 4 | 3   | 6  |
| 901 | 6 | 1 | 1 | 2 | 5 | 3   | 6  |
| 901 | 6 | 1 | 1 | 2 | 2 | 3   | 6  |
| 901 | 6 | 4 | 1 | 5 | 6 | 4.5 | 6  |
| 901 | 5 | 6 | 5 | 6 | 4 | 5.5 | 25 |
| 901 | 5 | 1 | 1 | 6 | 4 | 3   | 5  |
| 901 | 5 | 6 | 1 | 6 | 4 | 5   | 5  |
| 901 | 4 | 5 | 1 | 6 | 5 | 5   | 4  |
| 901 | 4 | 1 | 1 | 2 | 3 | 4   | 4  |
| 901 | 4 | 5 | 1 | 6 | 5 | 3   | 4  |
| 902 | 5 | 1 | 1 | 1 | 6 | 3   | 5  |
| 902 | 5 | 2 | 1 | 4 | 3 | 3   | 5  |
| 902 | 5 | 4 | 3 | 4 | 5 | 4.5 | 15 |
| 902 | 6 | 1 | 1 | 1 | 6 |     | 6  |
| 902 | 6 | 4 | 5 | 5 | 3 | 5   | 30 |
| 902 | 6 | 6 | 6 | 6 | 4 | 5.5 | 36 |
| 902 | 6 | 1 | 1 | 5 | 4 | 3   | 6  |
| 902 | 6 | 1 | 1 | 2 | 5 | 3.5 | 6  |
| 902 | 6 | 1 | 1 | 1 | 6 | 2.5 | 6  |
| 903 | 6 | 1 | 2 | 3 | 5 | 5.5 | 12 |
| 903 | 6 | 1 | 2 | 3 | 3 | 5   | 12 |
| 903 | 6 | 1 | 6 | 4 | 7 | 6   | 36 |
| 903 | 4 | 5 | 4 | 6 | 5 | 5   | 16 |
| 903 | 4 | 2 | 2 | 4 | 3 | 5   | 8  |
| 903 | 4 | 4 | 5 | 4 | 4 | 5   | 20 |
| 903 | 4 | 6 | 6 | 3 | 5 | 5   | 24 |
| 903 | 4 | 2 | 2 | 1 | 7 | 5   | 8  |

brand extension data

|     |   |   |   |   |   |     |    |
|-----|---|---|---|---|---|-----|----|
| 903 | 4 | 4 | 3 | 3 | 5 | 5   | 12 |
| 904 | 6 | 5 | 1 | 4 | 3 | 4.5 | 6  |
| 904 | 6 | 5 | 1 | 3 | 1 | 4.5 | 6  |
| 904 | 6 | 5 | 6 | 4 | 5 | 5.5 | 36 |
| 904 | 6 | 6 | 1 | 5 | 5 | 6   | 6  |
| 904 | 6 | 6 | 2 | 6 | 5 | 6.5 | 12 |
| 904 | 6 | 6 | 5 | 6 | 5 | 5.5 | 30 |
| 904 | 4 | 3 | 2 | 7 | 3 | 3.5 | 8  |
| 904 | 4 | 3 | 3 | 4 | 4 | 4   | 12 |
| 904 | 4 | 3 | 3 | 2 | 3 | 4   | 12 |
| 905 | 5 | 3 | 1 | 1 | 5 | 2.5 | 5  |
| 905 | 5 | 2 | 2 | 1 | 4 | 2   | 10 |
| 905 | 5 | 4 | 3 | 3 | 5 | 4   | 15 |
| 905 | 5 | 4 | 4 | 3 | 5 | 3.5 | 20 |
| 905 | 5 | 2 | 2 | 2 | 3 | 4   | 10 |
| 905 | 5 | 3 | 1 | 2 | 2 | 2   | 5  |
| 905 | 4 | 4 | 4 | 3 | 4 | 4   | 16 |
| 905 | 4 | 2 | 2 | 1 | 5 | 2.5 | 8  |
| 905 | 4 | 3 | 3 | 2 | 5 | 2   | 12 |
| 906 | 6 | 1 | 1 | 2 | 5 | 3   | 6  |
| 906 | 6 | 1 | 1 | 5 | 3 | 2.5 | 6  |
| 906 | 6 | 1 | 1 | 2 | 4 | 2.5 | 6  |
| 906 | 5 | 1 | 1 | 4 | 3 | 4   | 5  |
| 906 | 5 | 1 | 1 | 2 | 1 | 4.5 | 5  |
| 906 | 5 | 1 | 1 | 5 | 3 | 3   | 5  |
| 906 | 5 | 1 | 1 | 4 | 2 | 3   | 5  |
| 906 | 5 | 1 | 1 | 2 | 4 | 4.5 | 5  |
| 906 | 5 | 1 | 1 | 2 | 3 | 4   | 5  |
| 907 | 6 | 5 | 1 | 1 | 7 | 5   | 6  |
| 907 | 6 | 1 | 1 | 2 | 5 | 3   | 6  |
| 907 | 6 | 6 | 1 | 7 | 5 | 6.5 | 6  |
| 907 | 5 | 1 | 1 | 6 | 3 | 4.5 | 5  |
| 907 | 5 | 4 | 1 | 5 | 2 | 5.5 | 5  |
| 907 | 5 | 6 | 7 | 5 | 3 | 6.5 | 35 |
| 907 | 6 | 5 | 1 | 5 | 3 | 5   | 6  |
| 907 | 6 | 4 | 1 | 1 | 5 | 3.5 | 6  |
| 907 | 6 | 1 | 1 | 4 | 3 | 2   | 6  |
| 908 | 6 | 3 | 3 | 3 | 4 | 3   | 18 |
| 908 | 6 | 3 | 3 | 5 | 5 | 3   | 18 |
| 908 | 6 | 3 | 3 | 4 | 6 | 4.5 | 18 |
| 908 | 6 | 4 | 4 | 5 | 6 | 5   | 24 |
| 908 | 6 | 5 | 5 | 4 | 4 | 5   | 30 |
| 908 | 6 | 4 | 4 | 5 | 6 | 4.5 | 24 |
| 908 | 5 | 4 | 4 | 5 | 5 | 4.5 | 20 |
| 908 | 5 | 3 | 3 | 3 | 4 | 4   | 15 |
| 908 | 5 | 3 | 3 | 4 | 5 | 4.5 | 15 |
| 909 | 6 | 2 | 1 | 2 | 2 | 1.5 | 6  |
| 909 | 6 | 2 | 1 | 2 | 2 | 1   | 6  |
| 909 | 6 | 6 | 3 | 5 | 4 | 3.5 | 18 |
| 909 | 6 | 2 | 1 | 1 | 3 | 2   | 6  |
| 909 | 6 | 6 | 3 | 5 | 1 | 5   | 18 |

brand extension data

|     |   |   |   |   |   |     |    |
|-----|---|---|---|---|---|-----|----|
| 909 | 6 | 1 | 2 | 4 | 3 | 3   | 12 |
| 909 | 6 | 6 | 4 | 5 | 5 | 4.5 | 24 |
| 909 | 6 | 2 | 2 | 3 | 3 | 4   | 12 |
| 909 | 6 | 1 | 1 | 1 | 2 | 1.5 | 6  |
| 910 | 5 | 1 | 1 | 1 | 5 | 2   | 5  |
| 910 | 5 | 1 | 1 | 1 | 3 | 2   | 5  |
| 910 | 5 | 1 | 1 | 5 | 5 | 4   | 5  |
| 910 | 4 | 1 | 1 | 3 | 3 | 3.5 | 4  |
| 910 | 4 | 1 | 1 | 2 | 2 | 4   | 4  |
| 910 | 4 | 1 | 1 | 3 | 3 | 4.5 | 4  |
| 910 | 4 | 1 | 1 | 3 | 3 | 4   | 4  |
| 910 | 4 | 1 | 1 | 1 | 3 | 3   | 4  |
| 910 | 4 | 1 | 1 | 1 | 5 | 2.5 | 4  |
| 911 | 6 | 5 | 1 | 2 | 5 | 4.5 | 6  |
| 911 | 6 | 5 | 1 | 3 | 4 | 5   | 6  |
| 911 | 6 | 2 | 1 | 2 | 6 | 4   | 6  |
| 911 | 6 | 1 | 1 | 5 | 5 | 4   | 6  |
| 911 | 6 | 1 | 1 | 2 | 3 | 4.5 | 6  |
| 911 | 6 | 3 | 2 | 4 | 5 | 5   | 12 |
| 911 | 5 | 5 | 1 | 5 | 5 | 4   | 5  |
| 911 | 5 | 5 | 1 | 2 | 5 | 4   | 5  |
| 911 | 5 | 5 | 1 | 3 | 5 | 4   | 5  |
| 912 | 6 | 5 | 2 | 4 | 3 | 5.5 | 12 |
| 912 | 6 | 2 | 2 | 2 | 2 | 2   | 12 |
| 912 | 6 | 1 | 6 | 6 | 3 | 4.5 | 36 |
| 912 | 5 | 2 | 2 | 2 | 5 | 2.5 | 10 |
| 912 | 5 | 6 | 6 | 6 | 6 | 5.5 | 30 |
| 912 | 5 | 6 | 6 | 6 | 6 | 5.5 | 30 |
| 912 | 5 | 5 | 6 | 5 | 3 | 4.5 | 30 |
| 912 | 5 | 3 | 4 | 6 | 3 | 3.5 | 20 |
| 912 | 5 | 4 | 5 | 6 | 4 | 3.5 | 25 |
| 913 | 6 | 3 | 2 | 2 | 5 | 4   | 12 |
| 913 | 6 | 1 | 1 | 3 | 3 | 2.5 | 6  |
| 913 | 6 | 4 | 5 | 6 | 5 | 5   | 30 |
| 913 | 6 | 1 | 1 | 4 | 4 | 2.5 | 6  |
| 913 | 6 | 1 | 1 | 1 | 2 | 2   | 6  |
| 913 | 6 | 2 | 2 | 1 | 3 | 3.5 | 12 |
| 913 | 5 | 2 | 5 | 5 | 4 | 5   | 25 |
| 913 | 5 | 1 | 1 | 1 | 2 | 2   | 5  |
| 913 | 5 | 1 | 1 | 1 | 2 | 2   | 5  |
| 914 | 6 | 4 | 1 | 1 | 5 | 3.5 | 6  |
| 914 | 6 | 1 | 1 | 3 | 2 | 2.5 | 6  |
| 914 | 6 | 1 | 1 | 2 | 4 | 2.5 | 6  |
| 914 | 5 | 1 | 1 | 3 | 4 | 3.5 | 5  |
| 914 | 5 | 1 | 1 | 2 | 2 | 2.5 | 5  |
| 914 | 5 | 1 | 1 | 2 | 2 | 2.5 | 5  |
| 914 | 4 | 1 | 1 | 3 | 2 | 2.5 | 4  |
| 914 | 4 | 1 | 1 | 1 | 2 | 2   | 4  |
| 914 | 4 | 1 | 1 | 3 | 2 | 3   | 4  |
| 915 | 6 | 6 | 1 | 6 | 6 | 4   | 6  |
| 915 | 6 | 6 | 1 | 5 | 3 | 4   | 6  |

brand extension data

|     |   |   |   |   |   |     |    |
|-----|---|---|---|---|---|-----|----|
| 915 | 6 | 6 | 1 | 6 | 5 | 5.5 | 6  |
| 915 | 6 | 5 | 3 | 3 | 3 | 3.5 | 18 |
| 915 | 6 | 5 | 3 | 2 | 2 | 3.5 | 18 |
| 915 | 6 | 5 | 3 | 3 | 4 | 5   | 18 |
| 915 | 3 | 5 | 3 | 3 | 4 | 4.5 | 9  |
| 915 | 3 | 5 | 3 | 3 | 5 | 4.5 | 9  |
| 915 | 3 | 5 | 3 | 3 | 4 | 4.5 | 9  |
| 916 | 5 | 3 | 1 | 1 | 4 | 2.5 | 5  |
| 916 | 5 | 1 | 1 | 3 | 1 | 1   | 5  |
| 916 | 5 | 4 | 1 | 3 | 7 | 4   | 5  |
| 916 | 6 | 1 | 1 | 1 | 2 | 1   | 6  |
| 916 | 6 | 2 | 2 | 3 | 3 | 6   | 12 |
| 916 | 6 | 2 | 2 | 4 | 4 | 5   | 12 |
| 916 | 4 | 3 | 1 | 3 | 3 | 4   | 4  |
| 916 | 4 | 1 | 1 | 1 | 5 | 2.5 | 4  |
| 916 | 4 | 2 | 1 | 1 | 6 | 1.5 | 4  |
| 917 | 4 | 1 | 1 | 1 | 4 | 2   | 4  |
| 917 | 4 | 1 | 1 | 3 | 2 | 2   | 4  |
| 917 | 4 | 1 | 1 | 1 | 7 | 1.5 | 4  |
| 917 | 3 | 1 | 1 | 2 | 3 | 2   | 3  |
| 917 | 3 | 1 | 1 | 1 | 1 | 1.5 | 3  |
| 917 | 3 | 1 | 1 | 2 | 3 | 1.5 | 3  |
| 917 | 2 | 1 | 1 | 2 | 3 | 1   | 2  |
| 917 | 2 | 1 | 1 | 1 | 2 | 1.5 | 2  |
| 917 | 2 | 1 | 1 | 2 | 5 | 1   | 2  |
| 918 | 6 | 5 | 1 | 1 | 7 | 5   | 6  |
| 918 | 6 | 1 | 1 | 1 | 4 | 2   | 6  |
| 918 | 6 | 1 | 1 | 1 | 6 | 1   | 6  |
| 918 | 2 | 1 | 2 | 5 | 6 | 1   | 4  |
| 918 | 2 | 1 | 1 | 4 | 5 | 1   | 2  |
| 918 | 2 | 1 | 1 | 5 | 5 | 3   | 2  |
| 918 | 4 | 5 | 1 | 6 | 6 | 5   | 4  |
| 918 | 4 | 1 | 1 | 6 | 5 | 4   | 4  |
| 918 | 4 | 1 | 1 | 6 | 7 | 3   | 4  |
| 919 | 7 | 6 | 2 | 4 | 6 | 5.5 | 14 |
| 919 | 7 | 6 | 2 | 4 | 4 | 4   | 14 |
| 919 | 7 | 5 | 2 | 7 | 6 | 6   | 14 |
| 919 | 4 | 6 | 1 | 6 | 6 | 4   | 4  |
| 919 | 4 | 2 | 2 | 5 | 4 | 3.5 | 8  |
| 919 | 4 | 4 | 2 | 3 | 3 | 1.5 | 8  |
| 919 | 6 | 5 | 4 | 6 | 6 | 5   | 24 |
| 919 | 6 | 4 | 2 | 5 | 4 | 2.5 | 12 |
| 919 | 6 | 6 | 2 | 5 | 5 | 5   | 12 |
| 921 | 6 | 6 | 1 | 2 | 5 | 5   | 6  |
| 921 | 6 | 1 | 1 | 3 | 3 | 3   | 6  |
| 921 | 6 | 1 | 1 | 1 | 7 | 1   | 6  |
| 921 | 5 | 1 | 2 | 6 | 5 | 5.5 | 10 |
| 921 | 5 | 2 | 5 | 4 | 3 | 7   | 25 |
| 921 | 5 | 5 | 5 | 5 | 5 | 5.5 | 25 |
| 921 | 5 | 5 | 1 | 6 | 6 | 5   | 5  |
| 921 | 5 | 4 | 1 | 1 | 3 | 3.5 | 5  |

brand extension data

|     |   |   |   |   |   |     |    |
|-----|---|---|---|---|---|-----|----|
| 921 | 5 | 5 | 1 | 3 | 7 | 2.5 | 5  |
| 922 | 7 | 1 | 1 | 1 | 4 | 1.5 | 7  |
| 922 | 7 | 1 | 1 | 1 | 2 | 1.5 | 7  |
| 922 | 7 | 1 | 1 | 3 | 3 | 2   | 7  |
| 922 | 3 | 1 | 1 | 5 | 1 | 1   | 3  |
| 922 | 3 | 1 | 2 | 2 | 1 | 2   | 6  |
| 922 | 3 | 3 | 4 | 2 | 1 | 6   | 12 |
| 922 | 3 | 3 | 3 | 2 | 1 | 2.5 | 9  |
| 922 | 3 | 3 | 3 | 1 | 2 | 3   | 9  |
| 922 | 3 | 1 | 1 | 1 | 3 | 2.5 | 3  |
